# Supplementary material for: Changes in DNA Methylation in Response to 6-Benzylaminopurine Affect Allele-Specific Gene Expression in <em>Populus tomentosa</em>
Source: Preprints.org preprint supplement (doi:10.20944/preprints202002.0038.v1), 2020-02-04
Supplement: Supplementary file 2 [file supplementary]

Archive with 3 entries (2 files):
- Supplementary Files/
- Supplementary Files/Supplementary Figure S1-S5.pdf
- Supplementary Files/Supplementary Table S1-S17.xls
