# Supplementary material for: Changes in DNA Methylation in Response to 6-Benzylaminopurine Affect Allele-Specific Gene Expression in <em>Populus tomentosa</em>
Source: Preprints.org preprint supplement (doi:10.20944/preprints202002.0038.v1), 2020-02-04
Supplement: Supplementary file 2 [file supplementary › Supplementary Files/Supplementary Table S1-S17.xls]

## Sheet: Table S1
Table S1 Summary of P. tomentosa RNA-seq data.
ID	Raw reads	Quality trimed	Adaptor trimed	Clean reads	Clean ratio	rRNA trimed	Mapped reads	Mapping ratio
CK-1	144943679	142925949	141288293	136714251	0.943223	136001475	92363007	0.679132
CK-2	162986170	162945788	158711545	152247854	0.934115	151987548	102845963	0.676674
CK-3	151186125	150680347	144890292	142067473	0.939686	141381771	98333599	0.695518
6-BA-1	146362158	146220096	140702786	135302246	0.924435	124214562	93129785	0.744597
6-BA-2	151635257	150468952	147869214	142692152	0.941022	121254125	92126785	0.736578
6-BA-3	143087629	142003625	139263589	136896524	0.956732	129753415	94412547	0.754853

## Sheet: Table S2
Table S2 6-Benzylaminopurine-responsive genes.
gene_id	6-BA_FPKM	CK_FPKM	FC(6-BA/CK)	p-value	UP/DOWN regulate
Potri.001G015500	126.654	497.171	0.254749	8.81e-46	DOWN
Potri.001G015600	19.7796	83.2461	0.237604	2.51e-09	DOWN
Potri.001G024800	26.8476	66.9505	0.401007	0.000258342	DOWN
Potri.001G024900	108.037	294.692	0.36661	2.07e-17	DOWN
Potri.001G113900	19.056	41.8591	0.455242	0.0156187	DOWN
Potri.001G137300	1e-05	9.64037	1.04e-06	0.0126553	DOWN
Potri.001G140200	36.7099	79.5611	0.461405	0.000560125	DOWN
Potri.001G142200	13.1104	43.9156	0.298536	0.000313793	DOWN
Potri.001G154300	36.347	74.3844	0.488637	0.00232005	DOWN
Potri.001G155500	19.3714	58.1829	0.33294	6.3e-05	DOWN
Potri.001G163400	3.76926	15.0345	0.250707	0.0135999	DOWN
Potri.001G167800	3.39409	119.111	0.0284952	1.08e-28	DOWN
Potri.001G167900	10.4779	322.43	0.0324967	6.68e-75	DOWN
Potri.001G168200	8.06045	24.7909	0.325137	0.01541	DOWN
Potri.001G191000	100.737	215.678	0.467071	1.43e-08	DOWN
Potri.001G227300	77.6502	174.701	0.444475	6.69e-08	DOWN
Potri.001G227400	46.8112	99.9739	0.468234	0.000132154	DOWN
Potri.001G240300	1.37983	20.1744	0.0683951	9.19e-05	DOWN
Potri.001G251200	32.3841	95.0733	0.340622	3.39e-07	DOWN
Potri.001G293400	35.0166	107.846	0.324691	3.43e-08	DOWN
Potri.001G304000	26.2298	56.3308	0.465639	0.00439163	DOWN
Potri.001G311300	6.53691	30.6532	0.213254	0.000253803	DOWN
Potri.001G312800	8.47816	34.3243	0.247002	0.000233386	DOWN
Potri.001G324500	2.50483	15.4076	0.162571	0.00520625	DOWN
Potri.001G383000	16.6491	44.2668	0.376108	0.00135714	DOWN
Potri.001G388900	55.215	573.08	0.0963478	2.93e-99	DOWN
Potri.001G394900	1.79565	31.4133	0.0571621	2.35e-07	DOWN
Potri.001G397200	26.837	60.7388	0.441843	0.00131505	DOWN
Potri.001G415100	3.7961	16.3076	0.232781	0.00847765	DOWN
Potri.001G436900	18.5731	47.9007	0.387742	0.00199402	DOWN
Potri.002G004000	5.7785	27.6671	0.208858	0.000419975	DOWN
Potri.002G015100	148.667	1343.35	0.110669	1.26e-217	DOWN
Potri.002G018300	6.73523	133.64	0.0503983	3.23e-29	DOWN
Potri.002G032000	77.032	166.225	0.46342	6.86e-07	DOWN
Potri.002G055600	50.1034	119.843	0.418075	2.43e-06	DOWN
Potri.002G083200	20.0015	45.6354	0.438289	0.00968507	DOWN
Potri.002G093300	2.68458	18.4902	0.145189	0.00108879	DOWN
Potri.002G099200	3.69897	16.5527	0.223466	0.00847765	DOWN
Potri.002G103400	27.5887	73.8136	0.373762	3.91e-05	DOWN
Potri.002G112100	20.5927	51.6716	0.39853	0.00139328	DOWN
Potri.002G120700	6.09911	157.873	0.038633	1.34e-35	DOWN
Potri.002G146400	44.8573	128.814	0.348233	4.7e-09	DOWN
Potri.002G164200	0.59739	7.82589	0.0763351	0.0408942	DOWN
Potri.002G168600	29.0975	71.2838	0.408192	0.000215209	DOWN
Potri.002G176900	16.6128	70.2437	0.236502	4.28e-08	DOWN
Potri.002G179900	1.82459	14.0005	0.130323	0.00276146	DOWN
Potri.002G203500	19.1718	41.7136	0.459606	0.0156187	DOWN
Potri.002G216400	9.18677	95.1855	0.0965144	2.64e-17	DOWN
Potri.002G226500	6.86709	29.4351	0.233296	0.000407031	DOWN
Potri.002G256900	14.2836	34.5914	0.412923	0.0153146	DOWN
Potri.003G036400	5.49076	21.9719	0.249899	0.00697779	DOWN
Potri.003G040300	9.33216	23.4563	0.397853	0.0387079	DOWN
Potri.003G057000	12.0156	31.9954	0.375541	0.0159756	DOWN
Potri.003G066400	10.4618	446.321	0.0234401	3.55e-108	DOWN
Potri.003G066600	21.5751	416.645	0.0517829	4.29e-88	DOWN
Potri.003G066800	9.10437	170.334	0.0534501	4.94e-36	DOWN
Potri.003G068900	4.35483	24.8104	0.175524	0.000699771	DOWN
Potri.003G081200	16.7153	41.0491	0.407203	0.00389118	DOWN
Potri.003G086600	15.3796	46.9369	0.327665	0.000355625	DOWN
Potri.003G120300	13.3925	29.771	0.449851	0.0485134	DOWN
Potri.003G138200	6.71947	20.0145	0.33573	0.0216138	DOWN
Potri.003G139300	77.1032	160.541	0.480271	2.72e-06	DOWN
Potri.003G154900	15.6229	42.5449	0.36721	0.00158964	DOWN
Potri.003G169100	2.82699	12.8015	0.220833	0.0234505	DOWN
Potri.003G187200	6.53181	121.392	0.0538076	5.41e-26	DOWN
Potri.003G188900	0.489635	10.4003	0.0470789	0.0069814	DOWN
Potri.003G190600	53.8328	571.003	0.0942776	3.49e-100	DOWN
Potri.003G196200	21.4407	63.9049	0.335509	3.26e-05	DOWN
Potri.003G205900	22.1469	70.0181	0.316302	6.19e-06	DOWN
Potri.003G210400	3.3868	20.7959	0.162859	0.00196039	DOWN
Potri.004G000300	12.4111	38.2044	0.32486	0.0011921	DOWN
Potri.004G044400	3.26934	15.1567	0.215703	0.0135999	DOWN
Potri.004G054600	48.6072	269.767	0.180182	5.92e-34	DOWN
Potri.004G067800	11.5903	40.5058	0.286139	0.000267681	DOWN
Potri.004G072700	1e-05	57.1467	1.75e-07	1.61e-15	DOWN
Potri.004G080000	131.4	271.982	0.48312	1.26e-09	DOWN
Potri.004G082000	13.908	221.938	0.0626662	2.03e-45	DOWN
Potri.004G088100	7.73761	34.8979	0.221721	9.68e-05	DOWN
Potri.004G093800	5.00946	21.0217	0.238299	0.00697779	DOWN
Potri.004G096100	26.1502	68.3279	0.382716	0.000130774	DOWN
Potri.004G096200	1.02671	9.92825	0.103413	0.0410246	DOWN
Potri.004G096300	8.4709	22.4266	0.377717	0.0326454	DOWN
Potri.004G106600	30.8609	179.16	0.172253	7.29e-24	DOWN
Potri.004G111400	4.64464	14.6625	0.31677	0.0457321	DOWN
Potri.004G133200	29.4866	64.6024	0.456432	0.00191249	DOWN
Potri.004G142900	8.22454	59.8838	0.137342	1.52e-09	DOWN
Potri.004G157800	17.3228	36.0476	0.480553	0.0302808	DOWN
Potri.004G160900	5.13436	17.9114	0.286653	0.0387447	DOWN
Potri.004G163300	21.1633	44.2581	0.478179	0.0194512	DOWN
Potri.004G182000	18.6624	52.2842	0.356941	0.000331969	DOWN
Potri.004G188100	19.1142	80.8512	0.236412	9.8e-09	DOWN
Potri.005G025200	46.0857	118.804	0.387914	4.82e-07	DOWN
Potri.005G033800	3.01965	13.0583	0.231244	0.0340871	DOWN
Potri.005G044400	74.7427	261.539	0.28578	7.74e-22	DOWN
Potri.005G073300	18.0123	127.883	0.14085	4.67e-19	DOWN
Potri.005G081000	5.75411	31.4087	0.183201	5.78e-05	DOWN
Potri.005G091900	6.69112	32.6598	0.204873	9.73e-05	DOWN
Potri.005G101500	18.475	38.9673	0.474115	0.0251543	DOWN
Potri.005G110900	16.5882	49.812	0.333016	0.000212172	DOWN
Potri.005G158000	7.06919	48.5633	0.145567	1.49e-07	DOWN
Potri.005G229500	2.12404	23.8997	0.0888731	0.000125641	DOWN
Potri.005G237300	16.6024	36.2591	0.457882	0.0199617	DOWN
Potri.005G244000	1.4586	16.5586	0.0880872	0.000901092	DOWN
Potri.005G248500	9.7355	24.1355	0.403368	0.0271739	DOWN
Potri.006G010000	61.3011	137.735	0.445066	1.8e-06	DOWN
Potri.006G023300	1e-05	7.36578	1.36e-06	0.0408942	DOWN
Potri.006G027800	22.3368	245.637	0.0909342	5.16e-44	DOWN
Potri.006G028000	14.8791	190.865	0.0779561	8.21e-37	DOWN
Potri.006G030000	9.99322	113.773	0.0878347	1.51e-21	DOWN
Potri.006G030200	11.1743	136.396	0.0819254	1.31e-25	DOWN
Potri.006G030300	3.68004	49.6747	0.0740828	1.77e-10	DOWN
Potri.006G037600	24.4246	169.487	0.144109	5.91e-25	DOWN
Potri.006G044800	0.733694	13.9526	0.0525848	0.00114623	DOWN
Potri.006G100000	17.6416	39.2241	0.449764	0.012152	DOWN
Potri.006G126800	28.5982	1088.5	0.026273	4.05e-259	DOWN
Potri.006G127900	3.66724	24.7141	0.148387	0.000242873	DOWN
Potri.006G139400	11.7338	34.199	0.343104	0.00305617	DOWN
Potri.006G141400	19.7501	751.2	0.0262914	2.11e-179	DOWN
Potri.006G166700	13.0067	33.4991	0.38827	0.0132119	DOWN
Potri.006G166800	16.5472	53.5282	0.309131	6.54e-05	DOWN
Potri.006G167200	21.4306	85.196	0.251545	5.54e-09	DOWN
Potri.006G171100	2.44595	13.8027	0.177208	0.014314	DOWN
Potri.006G171400	2.89359	12.0232	0.240667	0.0234505	DOWN
Potri.006G171700	4.34566	16.0574	0.270633	0.0194704	DOWN
Potri.006G221500	0.586977	31.9224	0.0183876	3.25e-08	DOWN
Potri.006G242400	2.78237	14.0806	0.197603	0.0086645	DOWN
Potri.006G245500	20.3447	46.9967	0.432896	0.00711247	DOWN
Potri.006G263600	13.2373	29.3096	0.451637	0.0485134	DOWN
Potri.006G275900	1.04899	9.86098	0.106378	0.0410246	DOWN
Potri.007G009100	8.33681	27.1488	0.307078	0.00469311	DOWN
Potri.007G015100	129.263	261.196	0.494889	6.59e-09	DOWN
Potri.007G021300	3.92445	28.6666	0.1369	2.79e-05	DOWN
Potri.007G026200	157.752	508.957	0.309952	3.31e-37	DOWN
Potri.007G026800	33.4769	81.235	0.412099	7.97e-05	DOWN
Potri.007G044800	4.6939	15.5963	0.300962	0.029991	DOWN
Potri.007G052500	38.4398	105.092	0.365773	4.22e-07	DOWN
Potri.007G053600	6.04859	21.4856	0.281518	0.0143374	DOWN
Potri.007G081000	13.1795	29.3129	0.449614	0.0485134	DOWN
Potri.007G092500	24.5885	52.8441	0.465303	0.00625602	DOWN
Potri.007G103600	83.6523	173.108	0.483238	9.89e-07	DOWN
Potri.007G112900	12.9473	32.0587	0.403862	0.0112642	DOWN
Potri.007G133500	0.906622	13.8652	0.0653883	0.00114623	DOWN
Potri.008G004700	106.358	289.668	0.367172	3.93e-17	DOWN
Potri.008G010600	6.86925	24.0783	0.285288	0.00397223	DOWN
Potri.008G022100	6.0349	23.8503	0.253032	0.00614234	DOWN
Potri.008G040700	4.02029	16.4647	0.244176	0.0194704	DOWN
Potri.008G045300	7.61351	26.1443	0.291211	0.00352468	DOWN
Potri.008G060200	2.1017	14.6153	0.143801	0.0086645	DOWN
Potri.008G086700	6.53425	19.7824	0.330306	0.0322616	DOWN
Potri.008G099900	0.630693	27.8769	0.0226242	2.06e-07	DOWN
Potri.008G101500	10.572	62.1399	0.170132	3.49e-09	DOWN
Potri.008G106400	11.2897	33.334	0.338684	0.0044886	DOWN
Potri.008G123300	9.88206	24.0008	0.411739	0.0271739	DOWN
Potri.008G214600	12.9747	41.2415	0.314603	0.000357536	DOWN
Potri.008G214800	17.076	53.6837	0.318085	0.000124421	DOWN
Potri.009G004300	1e-05	7.58206	1.32e-06	0.0408942	DOWN
Potri.009G005400	3.4324	13.2231	0.259576	0.0340871	DOWN
Potri.009G045500	12.5914	34.8028	0.361793	0.00547396	DOWN
Potri.009G045800	5.56647	20.5946	0.270288	0.0108662	DOWN
Potri.009G058500	4.41444	30.4955	0.144757	3.19e-05	DOWN
Potri.009G083100	2.70678	11.1514	0.24273	0.0380553	DOWN
Potri.009G103800	1.11672	17.5598	0.0635953	0.000511664	DOWN
Potri.009G104600	3.15403	93.9697	0.0335643	7.67e-22	DOWN
Potri.009G110800	46.7927	123.082	0.380175	8.74e-08	DOWN
Potri.009G117000	2.86474	27.797	0.103059	1.28e-05	DOWN
Potri.009G117100	3.93194	29.9263	0.131387	1.61e-05	DOWN
Potri.009G124800	18.9962	42.1428	0.450758	0.00741049	DOWN
Potri.009G142000	0.623167	7.83124	0.0795745	0.0408942	DOWN
Potri.009G142300	0.910087	11.5238	0.0789746	0.00383526	DOWN
Potri.009G148800	14.7103	42.742	0.344165	0.000881314	DOWN
Potri.010G000600	7.43636	148.35	0.0501271	2.96e-32	DOWN
Potri.010G012100	14.3734	39.982	0.359497	0.00269214	DOWN
Potri.010G019000	12.2457	33.0033	0.371045	0.00788125	DOWN
Potri.010G021800	0.371582	17.5	0.0212333	9.97e-05	DOWN
Potri.010G035900	2.24664	14.3988	0.15603	0.0086645	DOWN
Potri.010G036800	11.6398	45.7192	0.254593	3.06e-05	DOWN
Potri.010G038000	23.9248	60.0893	0.398154	0.000302528	DOWN
Potri.010G039400	268.353	550.794	0.487211	8.26e-18	DOWN
Potri.010G059400	16.1863	41.994	0.385443	0.00389118	DOWN
Potri.010G059500	43.9682	101.267	0.434181	2.01e-05	DOWN
Potri.010G068900	40.7844	238.45	0.17104	1.77e-31	DOWN
Potri.010G076300	1e-05	8.872	1.13e-06	0.0228224	DOWN
Potri.010G126300	29.824	65.1614	0.457694	0.00141732	DOWN
Potri.010G142600	209.932	474.764	0.442182	1.58e-19	DOWN
Potri.010G142800	3.00237	17.5565	0.171012	0.00524449	DOWN
Potri.010G150500	315.635	1870.72	0.168724	5.46e-238	DOWN
Potri.010G150800	158.206	510.684	0.309792	2.97e-37	DOWN
Potri.010G150900	66.7289	183.326	0.36399	1.13e-11	DOWN
Potri.010G151200	16.8834	66.8867	0.252418	2.59e-07	DOWN
Potri.010G166600	11.1023	58.2238	0.190683	7.32e-08	DOWN
Potri.010G192600	5.95188	19.1364	0.311024	0.0167696	DOWN
Potri.010G198400	15.8445	34.8454	0.454709	0.024099	DOWN
Potri.010G218900	16.099	34.2364	0.470231	0.0365659	DOWN
Potri.010G237300	31.4125	81.7351	0.384321	2.96e-05	DOWN
Potri.010G237600	7.78168	29.9865	0.259506	0.000953609	DOWN
Potri.011G002500	2.61771	17.9905	0.145505	0.00184437	DOWN
Potri.011G031800	1.59475	9.39768	0.169696	0.0410246	DOWN
Potri.011G066900	8.1822	22.0834	0.370514	0.0326454	DOWN
Potri.011G075200	34.202	76.2613	0.448484	0.000596213	DOWN
Potri.011G076100	0.256287	7.29227	0.035145	0.0408942	DOWN
Potri.011G076200	2.20044	44.0232	0.0499836	5.54e-10	DOWN
Potri.011G076400	2.32422	31.5437	0.0736825	1.25e-06	DOWN
Potri.011G078200	6.81652	24.4794	0.278459	0.00397223	DOWN
Potri.011G087200	92.3976	185.386	0.498407	1.41e-06	DOWN
Potri.011G108200	2.16462	17.3105	0.125047	0.00184437	DOWN
Potri.011G108300	1.59094	12.8164	0.124133	0.00829708	DOWN
Potri.011G117600	3.44784	16.8907	0.204127	0.00847765	DOWN
Potri.011G117700	1.30885	9.52178	0.137459	0.0410246	DOWN
Potri.011G123300	5.46841	19.1005	0.286297	0.0167696	DOWN
Potri.011G140400	2.68326	39.793	0.0674305	1.1e-08	DOWN
Potri.011G140700	0.393871	13.8059	0.0285292	0.00114623	DOWN
Potri.012G021000	4.0083	22.1259	0.181159	0.00188026	DOWN
Potri.012G024600	95.5251	195.801	0.487868	3.89e-07	DOWN
Potri.012G032700	28.6035	102.592	0.278808	1.38e-09	DOWN
Potri.012G047300	8.55688	21.2248	0.403155	0.0468342	DOWN
Potri.012G047400	4.17851	14.9714	0.279099	0.0457321	DOWN
Potri.012G055100	13.0662	30.0756	0.434445	0.0354985	DOWN
Potri.012G070300	15.9655	32.465	0.491776	0.044299	DOWN
Potri.012G101300	1e-05	824.289	1.21e-08	3.79e-230	DOWN
Potri.012G130900	0.579665	38.706	0.0149761	3.43e-10	DOWN
Potri.013G002200	23.629	48.6966	0.485229	0.0133949	DOWN
Potri.013G013800	9.32151	38.0103	0.245236	0.000139562	DOWN
Potri.013G026100	18.1415	40.3031	0.450127	0.0138308	DOWN
Potri.013G033200	3.58441	18.2935	0.195939	0.00322204	DOWN
Potri.013G041600	9.92908	38.9969	0.254612	0.000139562	DOWN
Potri.013G065800	7.79559	21.5574	0.36162	0.0269272	DOWN
Potri.013G074300	6.90255	23.0921	0.298914	0.00614234	DOWN
Potri.013G074400	19.5835	59.8068	0.327446	4.29e-05	DOWN
Potri.013G074500	24.095	238.806	0.100898	6.67e-41	DOWN
Potri.013G080300	26.7703	1372.29	0.0195078	0	DOWN
Potri.013G080400	16.1474	764.721	0.0211154	1.01e-186	DOWN
Potri.013G080500	3.08844	174.962	0.0176521	1.43e-43	DOWN
Potri.013G082600	3.39695	204.111	0.0166427	1.12e-51	DOWN
Potri.013G082700	2.42051	162.146	0.014928	1.64e-41	DOWN
Potri.013G082800	3.35947	198.334	0.0169384	5.41e-50	DOWN
Potri.013G083600	1.89839	12.7243	0.149194	0.00829708	DOWN
Potri.013G100700	23.2853	235.93	0.0986958	8.11e-41	DOWN
Potri.013G100800	51.4644	519.977	0.0989744	3.59e-89	DOWN
Potri.013G101000	144.849	1279.53	0.113205	3.2e-205	DOWN
Potri.013G105800	17.4674	44.9076	0.388963	0.00233487	DOWN
Potri.013G120800	2.77354	19.7881	0.140162	0.000639682	DOWN
Potri.013G121400	7.8484	96.4177	0.0814	5.52e-19	DOWN
Potri.013G121900	2.80282	33.4658	0.0837518	3.87e-07	DOWN
Potri.013G122000	2.69678	18.9972	0.141957	0.00108879	DOWN
Potri.013G122400	1.03701	15.5598	0.0666467	0.00158085	DOWN
Potri.013G122500	2.56548	19.397	0.132262	0.000639682	DOWN
Potri.013G141400	5768.23	12492.6	0.461732	0	DOWN
Potri.013G142700	1310.79	2637.12	0.497054	6.84e-76	DOWN
Potri.014G019200	8.94372	26.8652	0.332911	0.00702902	DOWN
Potri.014G019400	35.4742	71.1037	0.498908	0.00276492	DOWN
Potri.014G019500	25.4343	62.3304	0.408056	0.0004309	DOWN
Potri.014G019700	6.3683	112.516	0.0565991	6.64e-24	DOWN
Potri.014G027800	14.2176	56.1786	0.253079	4.34e-06	DOWN
Potri.014G096100	98.0883	213.651	0.459105	1.15e-08	DOWN
Potri.014G103000	3.99529	13.6209	0.293321	0.0340871	DOWN
Potri.014G103700	14.0238	39.9204	0.351294	0.00269214	DOWN
Potri.014G134000	2.26612	19.5361	0.115997	0.000639682	DOWN
Potri.014G136600	4.25177	31.1705	0.136404	1.88e-05	DOWN
Potri.014G141900	8.31511	21.4089	0.388395	0.0468342	DOWN
Potri.015G000900	24.5345	50.7694	0.483254	0.0111577	DOWN
Potri.015G007300	46.5289	116.479	0.399462	9.39e-07	DOWN
Potri.015G007600	39.0565	128.927	0.302935	1.96e-10	DOWN
Potri.015G068500	57.7416	146.072	0.395295	2.22e-08	DOWN
Potri.015G074600	5.82924	25.8068	0.22588	0.00109917	DOWN
Potri.015G087300	22.7944	52.0036	0.438324	0.0026233	DOWN
Potri.015G087700	5.07549	24.8331	0.204384	0.00176274	DOWN
Potri.015G132900	9.91506	271.673	0.0364963	2.65e-62	DOWN
Potri.015G148500	1.8242	9.25576	0.197088	0.0410246	DOWN
Potri.016G014500	52.8353	485.571	0.108811	3.84e-80	DOWN
Potri.016G029600	44.459	91.3251	0.486821	0.000574144	DOWN
Potri.016G031500	4.43307	50.5431	0.0877087	5.35e-10	DOWN
Potri.016G083500	145.501	403.683	0.360434	5.23e-24	DOWN
Potri.016G089400	8.07626	24.3545	0.331613	0.01541	DOWN
Potri.016G090900	3.6169	39.9889	0.0904476	5.75e-08	DOWN
Potri.016G091100	17.3634	120.721	0.143831	5.45e-18	DOWN
Potri.016G115700	1.6839	16.1428	0.104313	0.000901092	DOWN
Potri.016G117100	5.26515	18.4321	0.285651	0.0256271	DOWN
Potri.016G141800	1e-05	12.9891	7.7e-07	0.00209968	DOWN
Potri.017G010900	7.40834	234.388	0.0316072	6.36e-55	DOWN
Potri.017G011000	0.975618	26.8089	0.0363916	3.84e-07	DOWN
Potri.017G011900	3.95817	126.559	0.0312753	1.35e-30	DOWN
Potri.017G012000	2.40767	62.295	0.0386495	1.89e-14	DOWN
Potri.017G012100	0.958627	13.4576	0.0712331	0.00114623	DOWN
Potri.017G014500	25.5214	56.2278	0.453893	0.00288208	DOWN
Potri.017G017300	134.015	290.275	0.461683	2.86e-11	DOWN
Potri.017G040800	26.5118	64.5021	0.411022	0.000502243	DOWN
Potri.017G046200	32.972	130.628	0.252411	2.87e-13	DOWN
Potri.017G051100	8.0003	28.7439	0.27833	0.00311165	DOWN
Potri.017G088700	10.3641	37.4864	0.276476	0.000463652	DOWN
Potri.017G142000	1e-05	12.8162	7.8e-07	0.00209968	DOWN
Potri.017G155200	5.35608	29.6701	0.180521	0.000157202	DOWN
Potri.018G026100	1e-05	7.1134	1.41e-06	0.0408942	DOWN
Potri.018G047100	41.6467	92.8662	0.448459	0.000131508	DOWN
Potri.018G049400	7.54711	29.9277	0.252178	0.000953609	DOWN
Potri.018G051300	9.04638	198.684	0.0455315	3.35e-43	DOWN
Potri.018G056300	2.5121	11.1111	0.226089	0.0380553	DOWN
Potri.018G082900	36.5632	73.9153	0.494663	0.00304574	DOWN
Potri.018G087400	4.1753	24.0273	0.173773	0.000699771	DOWN
Potri.018G088500	56.439	188.406	0.299561	3.07e-15	DOWN
Potri.018G088600	35.7325	120.968	0.295388	2.03e-10	DOWN
Potri.018G088800	116.671	333.254	0.350096	3.71e-21	DOWN
Potri.018G089100	10.4453	27.2058	0.383937	0.0159004	DOWN
Potri.018G089200	70.7972	205.751	0.344092	8.36e-14	DOWN
Potri.018G089400	48.3751	129.427	0.373764	3.25e-08	DOWN
Potri.018G089500	36.5854	110.083	0.332344	2.04e-08	DOWN
Potri.018G092100	23.7792	58.8559	0.404024	0.000596315	DOWN
Potri.018G094200	3.64959	22.2861	0.163761	0.000697901	DOWN
Potri.018G138600	10.8522	35.4519	0.306111	0.00107429	DOWN
Potri.019G008200	6.3376	19.2415	0.329371	0.0322616	DOWN
Potri.019G015100	3.13861	19.7823	0.158657	0.00325306	DOWN
Potri.019G015300	0.336845	12.5366	0.0268689	0.00209968	DOWN
Potri.019G031200	2.68611	40.006	0.0671427	6.07e-09	DOWN
Potri.019G050200	28.6001	710.227	0.040269	6.35e-158	DOWN
Potri.019G056400	9.14501	25.707	0.35574	0.0189037	DOWN
Potri.019G069100	1e-05	13.9674	7.16e-07	0.00114623	DOWN
Potri.019G088200	1e-05	40.267	2.48e-07	9.36e-11	DOWN
Potri.019G103500	7.29725	30.3211	0.240666	0.000609554	DOWN
Potri.019G120300	13.5377	28.044	0.482731	0.0484483	DOWN
Potri.019G121800	3.34819	28.6439	0.11689	2.79e-05	DOWN
Potri.019G124400	50.3364	458.721	0.109732	3.81e-75	DOWN
Potri.019G124600	1.9665	11.2842	0.17427	0.0142487	DOWN
Potri.T006100	4.01626	23.6535	0.169796	0.00115058	DOWN
Potri.T035300	63.3106	179.645	0.352421	8.35e-12	DOWN
Potri.T035400	45.6987	144.765	0.315675	2.98e-11	DOWN
Potri.T074700	86.2999	306.575	0.281497	1.03e-25	DOWN
Potri.T111500	1.51443	12.8341	0.118	0.00829708	DOWN
Potri.T131600	5.62407	18.6973	0.300796	0.0256271	DOWN
Potri.T156000	6.25198	20.7163	0.30179	0.0216138	DOWN
Potri.T177600	10.0093	50.5088	0.198169	1.27e-06	DOWN
Potri.T177800	8.58054	28.0909	0.305456	0.00311165	DOWN
Potri.001G014200	13.5199	4.05668	3.33275	0.0359201	UP
Potri.001G052300	9.38812	2.20144	4.26454	0.0491318	UP
Potri.001G068100	65.6887	30.4058	2.1604	6.15e-05	UP
Potri.001G071000	10.9824	2.10164	5.22563	0.0293243	UP
Potri.001G079600	21.7799	7.8845	2.76237	0.00555757	UP
Potri.001G092200	6.9212	0.91643	7.55235	0.0317161	UP
Potri.001G096900	11.8502	1.68263	7.04267	0.00553334	UP
Potri.001G191400	18.0308	3.66087	4.92528	0.00115166	UP
Potri.001G237200	58.3966	27.3046	2.13871	0.000220221	UP
Potri.001G254100	8.01898	0.539759	14.8566	0.0088008	UP
Potri.001G272700	57.9632	26.8487	2.15888	0.000184413	UP
Potri.001G289500	76.5204	29.4112	2.60174	4.89e-07	UP
Potri.001G332200	10.1627	1.09694	9.26459	0.0100089	UP
Potri.001G382100	12.0339	1.78462	6.74312	0.00303499	UP
Potri.001G400100	8558.57	3459.94	2.47362	0	UP
Potri.001G400200	3979.27	1630.07	2.44117	2.69e-273	UP
Potri.001G468100	255.541	126.81	2.01515	5.91e-14	UP
Potri.002G005700	11.9135	2.02913	5.87124	0.0172808	UP
Potri.002G093100	122.553	60.6669	2.0201	1.79e-07	UP
Potri.002G111900	135.384	62.4602	2.16752	5.55e-09	UP
Potri.002G182500	29.219	13.7762	2.12098	0.00947657	UP
Potri.002G208400	143.056	43.7118	3.27271	8.37e-16	UP
Potri.002G223100	34.7164	4.15252	8.36032	2.07e-07	UP
Potri.003G079800	25.2428	10.3265	2.44447	0.00766488	UP
Potri.003G100200	88.4705	40.8496	2.16576	2.38e-06	UP
Potri.003G134700	200.042	93.9208	2.1299	2e-12	UP
Potri.003G143300	108.003	22.5111	4.79777	1.26e-16	UP
Potri.003G159700	12.5827	3.76673	3.34048	0.0260364	UP
Potri.003G206000	25.1268	12.1649	2.06552	0.0236307	UP
Potri.003G207000	16.4904	4.96443	3.32171	0.00875014	UP
Potri.004G007600	31.1175	12.3182	2.52614	0.0024299	UP
Potri.004G149500	21.0496	6.29035	3.34633	0.00255147	UP
Potri.004G156000	16.4371	4.9062	3.35027	0.00875014	UP
Potri.004G164800	14.8583	1.216	12.219	0.000895275	UP
Potri.004G165300	25.9254	5.67268	4.57022	0.000128459	UP
Potri.004G172300	137.235	32.5074	4.22165	8.82e-19	UP
Potri.004G233900	267.982	124.506	2.15236	2.57e-16	UP
Potri.005G057400	6.11746	1e-05	611746	0.0317161	UP
Potri.005G068900	6.78493	0.531206	12.7727	0.0317161	UP
Potri.005G077800	9.67573	1e-05	967573	0.0045845	UP
Potri.005G087000	17.481	4.35501	4.014	0.00535752	UP
Potri.005G113100	27.5985	13.0981	2.10706	0.0193908	UP
Potri.005G132300	512.641	14.4787	35.4066	2.82e-141	UP
Potri.005G132500	22.5093	3.84301	5.85721	6.94e-05	UP
Potri.005G132700	16.0781	1.92151	8.36743	0.000258613	UP
Potri.005G132900	15.0062	6.72527	2.23132	0.038302	UP
Potri.005G133100	83.1107	5.15659	16.1174	1.73e-20	UP
Potri.005G174000	19.5903	6.26759	3.12565	0.0065593	UP
Potri.005G218200	23.8962	10.9756	2.17721	0.0168302	UP
Potri.005G256000	10.8506	2.46465	4.40249	0.0293243	UP
Potri.006G062100	207.561	64.7	3.20805	8.02e-22	UP
Potri.006G062200	16.165	5.82688	2.77421	0.0123894	UP
Potri.006G071200	14.1787	5.31133	2.66952	0.0466232	UP
Potri.006G109900	13.3406	4.08141	3.26863	0.0359201	UP
Potri.006G129200	109.581	35.1117	3.12093	1.12e-11	UP
Potri.006G177000	37.9285	10.9915	3.45071	2.3e-05	UP
Potri.006G196400	17.4376	4.33274	4.02461	0.00535752	UP
Potri.006G198800	17.0912	6.41361	2.66483	0.0162162	UP
Potri.006G232900	338.605	90.2021	3.75385	4.16e-40	UP
Potri.006G243600	444.631	151.503	2.9348	1.54e-40	UP
Potri.006G243700	206.489	72.5976	2.8443	6.2e-19	UP
Potri.006G250100	45.6391	7.86343	5.80397	1.24e-08	UP
Potri.007G008500	1221.46	508.453	2.40231	5.77e-83	UP
Potri.007G023800	22.744	11.0562	2.05713	0.0411817	UP
Potri.007G026500	25.769	6.15853	4.18428	0.000350513	UP
Potri.007G075200	13.4503	4.35294	3.08993	0.0359201	UP
Potri.007G077300	23.6667	8.50986	2.78109	0.00470443	UP
Potri.007G103800	26.5256	10.935	2.42575	0.00510555	UP
Potri.008G023800	162.38	73.6166	2.20575	6.54e-11	UP
Potri.008G029700	10.0387	2.03968	4.9217	0.0293243	UP
Potri.008G061800	45.5484	4.34683	10.4785	2.38e-10	UP
Potri.008G062300	19.5045	8.84698	2.20465	0.0251674	UP
Potri.008G073800	34.0156	11.5043	2.95677	0.000217417	UP
Potri.008G086800	13.7138	2.535	5.40978	0.00581283	UP
Potri.008G116700	20.9807	7.80242	2.689	0.00867244	UP
Potri.008G161200	25.1077	12.4834	2.01129	0.0236307	UP
Potri.008G164800	10.9005	2.70368	4.03173	0.0293243	UP
Potri.008G195000	47.3778	21.3244	2.22176	0.000469201	UP
Potri.008G224400	22.5093	6.72527	3.34697	0.00157086	UP
Potri.008G224500	28.9405	5.76452	5.02045	2.48e-05	UP
Potri.008G224600	19.2937	3.84301	5.02047	0.000667085	UP
Potri.009G019300	8.09493	1.13646	7.12293	0.0318095	UP
Potri.009G034500	12.5011	2.54892	4.90447	0.0100713	UP
Potri.009G052100	9.04978	2.17745	4.15614	0.0491318	UP
Potri.009G067200	51.6787	24.646	2.09684	0.000545722	UP
Potri.009G092300	29.4201	12.3532	2.38158	0.00535059	UP
Potri.009G098500	48.2703	23.4241	2.06071	0.000943795	UP
Potri.009G114400	40.0668	12.5227	3.19953	2.96e-05	UP
Potri.009G117300	21.697	8.53624	2.54175	0.0110969	UP
Potri.009G126000	82.721	16.5369	5.00221	4.53e-13	UP
Potri.009G126300	21.9437	3.80735	5.76351	0.000124624	UP
Potri.009G126400	7.89357	0.593595	13.2979	0.0167776	UP
Potri.009G126700	37.5253	15.9877	2.34714	0.000933321	UP
Potri.009G128500	17.9267	5.20994	3.44086	0.00772281	UP
Potri.009G131800	50.6774	20.0526	2.52722	8.1e-05	UP
Potri.009G141200	9.40587	0.606468	15.5093	0.0045845	UP
Potri.009G148100	16.447	1.77821	9.24919	0.000258613	UP
Potri.009G148900	31.2708	13.8363	2.26006	0.00302313	UP
Potri.010G093500	16.6561	5.90575	2.82032	0.0123894	UP
Potri.010G141400	31.4123	12.0486	2.60713	0.0024299	UP
Potri.010G141600	152.414	63.1559	2.4133	1.25e-11	UP
Potri.010G183500	31.5157	8.10311	3.88933	0.000112093	UP
Potri.010G185300	18.811	8.93368	2.10563	0.0372809	UP
Potri.010G207200	116.897	53.718	2.17612	5.55e-08	UP
Potri.010G236500	665.911	175.959	3.78447	3.05e-78	UP
Potri.011G069600	16.4141	7.21023	2.2765	0.0462567	UP
Potri.011G074100	2009.86	174.351	11.5277	0	UP
Potri.011G074900	1550.82	40.4911	38.3003	0	UP
Potri.011G075000	780.883	124.911	6.25152	1.38e-130	UP
Potri.011G118900	50.502	19.1945	2.63107	4.26e-05	UP
Potri.011G120200	11.5561	1.24008	9.31883	0.00553334	UP
Potri.011G120300	12.4085	1.85131	6.70255	0.00303499	UP
Potri.011G149100	16.5583	7.8262	2.11575	0.0462567	UP
Potri.011G165000	59.1042	24.103	2.45215	2.74e-05	UP
Potri.012G035200	14.0168	2.72215	5.14917	0.00332646	UP
Potri.012G110500	26.5203	12.9819	2.04287	0.0165105	UP
Potri.012G111500	17.4084	3.71918	4.68071	0.00197596	UP
Potri.012G123900	12.2306	2.85298	4.28696	0.0100713	UP
Potri.012G140800	69.3665	29.6789	2.33723	7.87e-06	UP
Potri.013G007000	141.164	33.9174	4.16199	3.28e-19	UP
Potri.013G041300	14.9234	5.9643	2.50212	0.0466232	UP
Potri.013G042700	63.8133	31.0859	2.05281	0.000206868	UP
Potri.013G057200	45.2248	17.8695	2.53084	0.000132049	UP
Potri.013G057300	17.342	6.8689	2.52471	0.0162162	UP
Potri.013G061800	100.795	50.2535	2.00573	4.26e-06	UP
Potri.013G119600	42.3101	19.8224	2.13446	0.00141316	UP
Potri.013G139200	19486.4	808.437	24.1038	0	UP
Potri.013G139800	29261.1	1339.16	21.8503	0	UP
Potri.013G139900	198.62	10.5327	18.8575	7.13e-50	UP
Potri.013G140100	6081.96	948.691	6.4109	0	UP
Potri.013G154700	98.7668	6.86704	14.3827	4.16e-24	UP
Potri.014G018900	27.2907	12.3533	2.20918	0.0114342	UP
Potri.014G020100	26.5272	0.269902	98.2846	4.44e-08	UP
Potri.014G035000	9.89492	2.24884	4.40001	0.0491318	UP
Potri.014G110400	99.8754	27.909	3.57861	2.1e-12	UP
Potri.014G134300	50.3048	11.0715	4.54363	7.89e-08	UP
Potri.014G149700	168.039	51.1217	3.28704	2.62e-18	UP
Potri.014G160100	15.689	5.06758	3.09596	0.0303729	UP
Potri.014G168100	22.3795	10.2996	2.17285	0.0245882	UP
Potri.014G185400	23.5812	3.84301	6.13613	3.84e-05	UP
Potri.014G185700	18.2218	5.76452	3.16103	0.00476415	UP
Potri.014G186000	23.2442	1.16719	19.9147	3.02e-06	UP
Potri.015G010500	44.7684	16.3908	2.73131	0.000101415	UP
Potri.015G044500	32.0893	10.7019	2.99847	0.000382561	UP
Potri.015G071500	17.9436	3.08126	5.82346	0.00197596	UP
Potri.015G087800	11.4823	1.58988	7.22212	0.00553334	UP
Potri.015G128200	17.1625	5.56764	3.08254	0.00772281	UP
Potri.015G128400	26.9911	10.3299	2.61291	0.00510555	UP
Potri.015G129400	80.7043	33.3593	2.41924	8.74e-07	UP
Potri.015G143600	28.8742	11.4239	2.52753	0.00429373	UP
Potri.016G025500	22.6691	9.20046	2.46391	0.0138212	UP
Potri.016G088700	45.5208	13.4502	3.3844	6.44e-06	UP
Potri.016G129500	9.26686	0.980699	9.44924	0.0045845	UP
Potri.016G129600	14.5677	1.78705	8.15181	0.000895275	UP
Potri.016G138600	29.4389	7.51394	3.9179	0.000119085	UP
Potri.017G029000	24.0854	9.61947	2.50382	0.00608255	UP
Potri.017G043400	14.697	3.33032	4.41309	0.00954503	UP
Potri.017G079700	20.9553	8.95281	2.34064	0.0167997	UP
Potri.017G081300	8.72912	1.63367	5.34326	0.0318095	UP
Potri.018G015100	41.1796	15.9311	2.58486	0.000180182	UP
Potri.018G031100	43.1263	13.6006	3.17091	1.65e-05	UP
Potri.018G052500	16.0167	5.17295	3.09624	0.0123894	UP
Potri.018G059400	14.1711	4.57089	3.10029	0.0226813	UP
Potri.018G101400	7.20546	1e-05	720546	0.0167776	UP
Potri.019G038200	45.8547	18.9975	2.41372	0.000252053	UP
Potri.019G057500	19.8272	1.53931	12.8806	3.9e-05	UP
Potri.019G075000	45.8332	20.2477	2.26363	0.0568513	UP
Potri.T006700	12.8598	0.960739	13.3853	0.0450068	UP
Potri.T140800	23.5812	3.84301	6.13613	0.00374981	UP
Potri.T141000	86.6671	5.1056	16.9749	7.48e-19	UP
Potri.T141200	83.2341	3.92065	21.2297	6.08e-20	UP

## Sheet: Table S3
Table S3 The significant GO categories of 6-BA-responsive genes.
GO_ID	GO_term	Term_type	Number of genes	Up_gene	Down_gene	P-value	FDR
GO:0009116	nucleoside metabolic process	biological_process	10	0	10	3.63306e-14	4.68665e-12
GO:0005524	ATP binding	molecular_function	2	0	2	4.13796e-09	2.66899e-07
GO:0016788	hydrolase activity, acting on ester bonds	molecular_function	9	0	9	2.72361e-06	0.000117115
GO:0015035	protein disulfide oxidoreductase activity	molecular_function	7	2	5	4.88739e-06	0.000157618
GO:0045454	cell redox homeostasis	biological_process	8	2	6	1.03339e-05	0.000266614
GO:0009073	aromatic amino acid family biosynthetic process	biological_process	3	0	3	1.22587e-05	0.000263562
GO:0017148	negative regulation of translation	biological_process	2	0	2	1.50558e-05	0.000277458
GO:0030598	rRNA N-glycosylase activity	molecular_function	2	0	2	1.50558e-05	0.000277458
GO:0006629	lipid metabolic process	biological_process	11	0	11	1.64527e-05	0.000235823
GO:0005874	microtubule	cellular_component	4	4	0	1.65789e-05	0.000213868
GO:0006184	GTP catabolic process	biological_process	4	4	0	1.89026e-05	0.000221676
GO:0043234	protein complex	cellular_component	4	4	0	2.43084e-05	0.000261315
GO:0051258	protein polymerization	biological_process	4	4	0	2.43084e-05	0.000285071
GO:0003871	5-methyltetrahydropteroyltriglutamate-homocysteine S-methyltransferase activity	molecular_function	2	2	0	4.16991e-05	0.000384228
GO:0016841	ammonia-lyase activity	molecular_function	2	0	2	4.16991e-05	0.000448266
GO:0055114	oxidation-reduction process	biological_process	31	6	25	4.30346e-05	0.000346967
GO:0009055	electron carrier activity	molecular_function	16	3	13	5.93314e-05	0.000450221
GO:0016702	oxidoreductase activity, acting on single donors with incorporation of molecular oxygen, incorporation of two atoms of oxygen	molecular_function	3	0	3	6.22019e-05	0.00044578
GO:0007017	microtubule-based process	biological_process	4	4	0	6.50994e-05	0.000441991
GO:0008171	O-methyltransferase activity	molecular_function	4	0	4	8.65942e-05	0.000558533
GO:0004332	fructose-bisphosphate aldolase activity	molecular_function	2	2	0	0.000160288	0.000984624
GO:0004866	endopeptidase inhibitor activity	molecular_function	3	0	3	0.000169797	0.000995629
GO:0051920	peroxiredoxin activity	molecular_function	1	0	1	0.000314689	0.00176499
GO:0003856	3-dehydroquinate synthase activity	molecular_function	1	0	1	0.000314689	0.00202974
GO:0046417	chorismate metabolic process	biological_process	1	0	1	0.000314689	0.00202974
GO:0003824	catalytic activity	molecular_function	16	3	13	0.000323862	0.00160685
GO:0005515	protein binding	molecular_function	8	0	8	0.000325968	0.0015574
GO:0005544	calcium-dependent phospholipid binding	molecular_function	2	0	2	0.000482146	0.00222132
GO:0020037	heme binding	molecular_function	12	1	11	0.00078906	0.00350996
GO:0008061	chitin binding	molecular_function	2	0	2	0.00106269	0.00456955
GO:0006032	chitin catabolic process	biological_process	2	1	1	0.00138161	0.0057493
GO:0004568	chitinase activity	molecular_function	2	1	1	0.00138161	0.00685494
GO:0009086	methionine biosynthetic process	biological_process	1	1	0	0.00155074	0.00606197
GO:0042742	defense response to bacterium	biological_process	1	0	1	0.00155074	0.00740908
GO:0050832	defense response to fungus	biological_process	1	0	1	0.00155074	0.00740908
GO:0005506	iron ion binding	molecular_function	10	1	9	0.00183453	0.00657373
GO:0004664	prephenate dehydratase activity	molecular_function	1	0	1	0.00216055	0.00753273
GO:0004106	chorismate mutase activity	molecular_function	1	0	1	0.00216055	0.00961072
GO:0003849	3-deoxy-7-phosphoheptulonate synthase activity	molecular_function	1	0	1	0.00216055	0.00961072
GO:0009094	L-phenylalanine biosynthetic process	biological_process	1	0	1	0.00216055	0.00961072
GO:0016705	oxidoreductase activity, acting on paired donors, with incorporation or reduction of molecular oxygen	molecular_function	9	1	8	0.00270864	0.00852231
GO:0004420	hydroxymethylglutaryl-CoA reductase (NADPH) activity	molecular_function	1	0	1	0.00286683	0.00880528
GO:0015936	coenzyme A metabolic process	biological_process	1	0	1	0.00286683	0.0119297
GO:0004807	triose-phosphate isomerase activity	molecular_function	1	0	1	0.00286683	0.0119297
GO:0004020	adenylylsulfate kinase activity	molecular_function	1	0	1	0.00286683	0.0119297
GO:0046872	metal ion binding	molecular_function	7	2	5	0.00346531	0.00971794
GO:0003854	3-beta-hydroxy-delta5-steroid dehydrogenase activity	molecular_function	4	3	1	0.00385288	0.0105749
GO:0010181	FMN binding	molecular_function	2	0	2	0.00420975	0.0113137
GO:0050662	coenzyme binding	molecular_function	5	3	2	0.00446986	0.0117676
GO:0006694	steroid biosynthetic process	biological_process	4	3	1	0.00460283	0.0118753
GO:0016020	membrane	cellular_component	2	1	1	0.00469732	0.0118815
GO:0005622	intracellular	cellular_component	1	0	1	0.00582581	0.0144525
GO:0008652	cellular amino acid biosynthetic process	biological_process	2	2	0	0.00618584	0.0150561
GO:0000103	sulfate assimilation	biological_process	1	0	1	0.00662825	0.0158342
GO:0008831	dTDP-4-dehydrorhamnose reductase activity	molecular_function	2	2	0	0.00663835	0.01557
GO:0016209	antioxidant activity	molecular_function	2	0	2	0.00663835	0.0208865
GO:0045226	extracellular polysaccharide biosynthetic process	biological_process	2	2	0	0.00663835	0.0208865
GO:0003995	acyl-CoA dehydrogenase activity	molecular_function	1	0	1	0.00779571	0.0173387
GO:0016765	transferase activity, transferring alkyl or aryl (other than methyl) groups	molecular_function	1	0	1	0.0103936	0.022725
GO:0006801	superoxide metabolic process	biological_process	1	0	1	0.0103936	0.0311808
GO:0051539	4 iron, 4 sulfur cluster binding	molecular_function	1	0	1	0.0103936	0.0311808
GO:0003993	acid phosphatase activity	molecular_function	1	0	1	0.0103936	0.0311808
GO:0000272	polysaccharide catabolic process	biological_process	1	0	1	0.0118214	0.0242057
GO:0016161	beta-amylase activity	molecular_function	1	0	1	0.0118214	0.0346581
GO:0016998	cell wall macromolecule catabolic process	biological_process	2	1	1	0.0144049	0.0285882
GO:0016772	transferase activity, transferring phosphorus-containing groups	molecular_function	1	0	1	0.014928	0.0291774
GO:0016651	oxidoreductase activity, acting on NADH or NADPH	molecular_function	1	0	1	0.0166043	0.0319694
GO:0004097	catechol oxidase activity	molecular_function	1	0	1	0.0166043	0.0455734
GO:0033177	proton-transporting two-sector ATPase complex, proton-transporting domain	cellular_component	1	0	1	0.0183608	0.0343268
GO:0008168	methyltransferase activity	molecular_function	5	0	5	0.0194401	0.0358253
GO:0006520	cellular amino acid metabolic process	biological_process	2	0	2	0.0219787	0.0399332
GO:0006096	glycolysis	biological_process	2	2	0	0.0219787	0.0567052
GO:0044237	cellular metabolic process	biological_process	4	3	1	0.0220785	0.0390154
GO:0003924	GTPase activity	molecular_function	4	4	0	0.025114	0.0437798
GO:0004806	triglyceride lipase activity	molecular_function	2	0	2	0.0259543	0.0446414
GO:0019684	photosynthesis, light reaction	biological_process	1	0	1	0.0283044	0.0480431
GO:0005634	nucleus	cellular_component	1	1	0	0.029672	0.0497103
GO:0003677	DNA binding	molecular_function	4	1	3	0.030464	0.0503828
GO:0004197	cysteine-type endopeptidase activity	molecular_function	1	1	0	0.0305168	0.0498313
GO:0006355	regulation of transcription, DNA-dependent	biological_process	4	0	4	0.031221	0.0503439
GO:0008152	metabolic process	biological_process	16	0	16	0.0313283	0.0498932
GO:0016616	oxidoreductase activity, acting on the CH-OH group of donors, NAD or NADP as acceptor	molecular_function	4	3	1	0.032631	0.0513342
GO:0009058	biosynthetic process	biological_process	5	2	3	0.0448315	0.0696779
GO:0008146	sulfotransferase activity	molecular_function	1	0	1	0.0452587	0.0695045
GO:0015078	hydrogen ion transmembrane transporter activity	molecular_function	1	0	1	0.0535227	0.0812285
GO:0016491	oxidoreductase activity	molecular_function	13	2	11	0.0564733	0.08471
GO:0003700	sequence-specific DNA binding transcription factor activity	molecular_function	1	0	1	0.0587542	0.0871183
GO:0016747	transferase activity, transferring acyl groups other than amino-acyl groups	molecular_function	4	0	4	0.0676135	0.0991153
GO:0006073	cellular glucan metabolic process	biological_process	1	1	0	0.071692	0.103913
GO:0016762	xyloglucan:xyloglucosyl transferase activity	molecular_function	1	1	0	0.071692	0.138034
GO:0048046	apoplast	cellular_component	1	1	0	0.071692	0.138034
GO:0009607	response to biotic stimulus	biological_process	1	0	1	0.0782049	0.109657
GO:0015991	ATP hydrolysis coupled proton transport	biological_process	1	0	1	0.0815425	0.113107
GO:0006952	defense response	biological_process	1	0	1	0.0883752	0.121281
GO:0004857	enzyme inhibitor activity	molecular_function	2	1	1	0.0890672	0.120944
GO:0005509	calcium ion binding	molecular_function	2	0	2	0.099509	0.133715
GO:0016301	kinase activity	molecular_function	1	0	1	0.110067	0.146378
GO:0046983	protein dimerization activity	molecular_function	4	0	4	0.111323	0.146538
GO:0016787	hydrolase activity	molecular_function	5	0	5	0.113381	0.147739
GO:0016758	transferase activity, transferring hexosyl groups	molecular_function	4	0	4	0.128307	0.165516
GO:0030170	pyridoxal phosphate binding	molecular_function	2	0	2	0.136664	0.174551
GO:0004185	serine-type carboxypeptidase activity	molecular_function	1	0	1	0.141512	0.178971
GO:0009523	photosystem II	cellular_component	1	0	1	0.14978	0.187588
GO:0005783	endoplasmic reticulum	cellular_component	1	0	1	0.15397	0.190982
GO:0030599	pectinesterase activity	molecular_function	2	1	1	0.154624	0.189966
GO:0005618	cell wall	cellular_component	2	2	0	0.15727	0.191394
GO:0000786	nucleosome	cellular_component	1	1	0	0.162459	0.195862
GO:0030528	transcription regulator activity	molecular_function	3	0	3	0.16351	0.195304
GO:0005525	GTP binding	molecular_function	4	4	0	0.173224	0.205008
GO:0006412	translation	biological_process	1	0	1	0.188004	0.220477
GO:0031072	heat shock protein binding	molecular_function	2	2	0	0.19341	0.224774
GO:0030001	metal ion transport	biological_process	2	2	0	0.202189	0.232878
GO:0006334	nucleosome assembly	biological_process	1	1	0	0.211514	0.241463
GO:0004553	hydrolase activity, hydrolyzing O-glycosyl compounds	molecular_function	4	2	2	0.229239	0.259402
GO:0045735	nutrient reservoir activity	molecular_function	1	1	0	0.254175	0.285118
GO:0042545	cell wall modification	biological_process	1	1	0	0.254175	0.360314
GO:0005507	copper ion binding	molecular_function	2	2	0	0.2645	0.291629
GO:0003735	structural constituent of ribosome	molecular_function	1	0	1	0.288986	0.315926
GO:0005840	ribosome	cellular_component	1	0	1	0.323301	0.350469
GO:0016740	transferase activity	molecular_function	1	0	1	0.344467	0.370302
GO:0004190	aspartic-type endopeptidase activity	molecular_function	1	1	0	0.354806	0.378264
GO:0008270	zinc ion binding	molecular_function	3	2	1	0.358301	0.378859
GO:0015979	photosynthesis	biological_process	1	0	1	0.386093	0.404927
GO:0055085	transmembrane transport	biological_process	3	0	3	0.427673	0.444918
GO:0022857	transmembrane transporter activity	molecular_function	1	0	1	0.476273	0.491514
GO:0005975	carbohydrate metabolic process	biological_process	4	2	2	0.702521	0.719248
GO:0006508	proteolysis	biological_process	3	2	1	0.956046	0.971102
GO:0016887	ATPase activity	molecular_function	1	0	1	0.976654	0.984284
GO:0016021	integral to membrane	cellular_component	7	0	7	0.993852	0.993852

## Sheet: Table S4
Table S4 Characteristics of all lncRNA identified in this study.
lncRNA_id	Class	Chromosome	Length
TCONS_00001011	Antisense LncRNA	Chr01:11979561-11982513	450
TCONS_00002615	Antisense LncRNA	Chr01:38902909-38987812	434
TCONS_00003998	Antisense LncRNA	Chr01:9518131-9522061	1758
TCONS_00014618	Antisense LncRNA	Chr01:9518131-9522061	305
TCONS_00022927	Antisense LncRNA	Chr01:15182796-15189424	346
TCONS_00034178	Antisense LncRNA	Chr02:8056940-8089435	532
TCONS_00034184	Antisense LncRNA	Chr02:8056940-8089435	363
TCONS_00041404	Antisense LncRNA	Chr02:9851029-9862558	496
TCONS_00064147	Antisense LncRNA	Chr03:20472393-20480357	289
TCONS_00065599	Antisense LncRNA	Chr03:15102359-15104678	205
TCONS_00075847	Antisense LncRNA	Chr04:23289885-23294645	761
TCONS_00077843	Antisense LncRNA	Chr04:21978844-21990057	224
TCONS_00081914	Antisense LncRNA	Chr04:9164087-9167060	702
TCONS_00132904	Antisense LncRNA	Chr07:2019098-2022527	428
TCONS_00136340	Antisense LncRNA	Chr08:1057296-1059013	535
TCONS_00144764	Antisense LncRNA	Chr08:12588598-12589169	220
TCONS_00146311	Antisense LncRNA	Chr08:15700210-15706906	423
TCONS_00168960	Antisense LncRNA	Chr10:20582104-20591471	517
TCONS_00170543	Antisense LncRNA	Chr10:16273418-16277648	339
TCONS_00175557	Antisense LncRNA	Chr10:8093809-8128386	389
TCONS_00175558	Antisense LncRNA	Chr10:8093809-8128386	349
TCONS_00178342	Antisense LncRNA	Chr10:20782683-20785460	372
TCONS_00180368	Antisense LncRNA	Chr10:17717132-17719347	360
TCONS_00187104	Antisense LncRNA	Chr11:11334565-11337674	716
TCONS_00206238	Antisense LncRNA	Chr13:12370661-12371165	307
TCONS_00206917	Antisense LncRNA	Chr13:3582799-3585113	412
TCONS_00218708	Antisense LncRNA	Chr14:7489921-7491260	563
TCONS_00245641	Antisense LncRNA	Chr16:14306652-14315348	234
TCONS_00252825	Antisense LncRNA	Chr17:11431753-11453517	421
TCONS_00270642	Antisense LncRNA	Chr18:14694391-14695561	568
TCONS_00272405	Antisense LncRNA	Chr18:14694391-14695561	325
TCONS_00283371	Antisense LncRNA	scaffold_218:681-31648	270
TCONS_00283404	Antisense LncRNA	scaffold_218:681-31648	244
TCONS_00285743	Antisense LncRNA	scaffold_32:51297-99439	372
TCONS_00006005	Intergenic LncRNA	Chr01:41164610-41186607	503
TCONS_00017589	Intergenic LncRNA	Chr01:38519462-38519877	283
TCONS_00024436	Intergenic LncRNA	Chr01:26307515-26324015	275
TCONS_00028061	Intergenic LncRNA	Chr01:35661283-35667015	335
TCONS_00036354	Intergenic LncRNA	Chr02:9851029-9862558	814
TCONS_00043747	Intergenic LncRNA	Chr02:1991090-1992410	553
TCONS_00044031	Intergenic LncRNA	Chr02:8214689-8246346	436
TCONS_00044933	Intergenic LncRNA	Chr02:86306-89495	684
TCONS_00049283	Intergenic LncRNA	Chr02:9851029-9862558	433
TCONS_00050517	Intergenic LncRNA	Chr02:4961291-4962821	350
TCONS_00050741	Intergenic LncRNA	Chr02:86306-89495	272
TCONS_00051443	Intergenic LncRNA	Chr02:9064204-9066242	617
TCONS_00055425	Intergenic LncRNA	Chr03:5917221-5917704	207
TCONS_00063177	Intergenic LncRNA	Chr03:2991439-3026610	294
TCONS_00067109	Intergenic LncRNA	Chr03:12494426-12495768	330
TCONS_00073701	Intergenic LncRNA	Chr04:2545710-2590051	492
TCONS_00077601	Intergenic LncRNA	Chr04:9164087-9167060	381
TCONS_00077602	Intergenic LncRNA	Chr04:9164087-9167060	634
TCONS_00081442	Intergenic LncRNA	Chr04:2545710-2590051	988
TCONS_00102335	Intergenic LncRNA	Chr05:22937411-22944011	403
TCONS_00107607	Intergenic LncRNA	Chr06:4670511-4671469	275
TCONS_00108710	Intergenic LncRNA	Chr06:22132048-22134601	358
TCONS_00119256	Intergenic LncRNA	Chr06:3967076-3967624	322
TCONS_00121629	Intergenic LncRNA	Chr06:4863916-4865297	575
TCONS_00131061	Intergenic LncRNA	Chr07:5018103-5040338	294
TCONS_00131707	Intergenic LncRNA	Chr07:9164740-9178185	606
TCONS_00143102	Intergenic LncRNA	Chr08:11234777-11236133	237
TCONS_00149379	Intergenic LncRNA	Chr08:461610-462589	623
TCONS_00149517	Intergenic LncRNA	Chr08:5516474-5517171	639
TCONS_00149995	Intergenic LncRNA	Chr08:9238009-9239124	484
TCONS_00155528	Intergenic LncRNA	Chr09:11804155-11805641	471
TCONS_00155529	Intergenic LncRNA	Chr09:11804155-11805641	238
TCONS_00167417	Intergenic LncRNA	Chr10:4574774-4575148	209
TCONS_00177955	Intergenic LncRNA	Chr10:10749419-10752707	1082
TCONS_00180579	Intergenic LncRNA	Chr10:6618140-6625215	203
TCONS_00180907	Intergenic LncRNA	Chr10:19891574-19893905	882
TCONS_00181006	Intergenic LncRNA	Chr10:3379751-3380770	313
TCONS_00181632	Intergenic LncRNA	Chr10:15979154-15986200	380
TCONS_00182325	Intergenic LncRNA	Chr10:19891574-19893905	353
TCONS_00192933	Intergenic LncRNA	Chr11:11334565-11337674	256
TCONS_00195437	Intergenic LncRNA	Chr11:16478403-16480170	948
TCONS_00195976	Intergenic LncRNA	Chr12:3074611-3075405	529
TCONS_00203860	Intergenic LncRNA	Chr12:13433811-13435279	305
TCONS_00207724	Intergenic LncRNA	Chr13:979306-984897	883
TCONS_00209561	Intergenic LncRNA	Chr13:6905980-6907440	414
TCONS_00210627	Intergenic LncRNA	Chr13:13767334-13771701	806
TCONS_00217398	Intergenic LncRNA	Chr14:9187083-9188083	528
TCONS_00225453	Intergenic LncRNA	Chr14:8105641-8122620	1044
TCONS_00225973	Intergenic LncRNA	Chr14:7848419-7849206	308
TCONS_00228447	Intergenic LncRNA	Chr14:9186168-9186982	431
TCONS_00234612	Intergenic LncRNA	Chr15:3253040-3257256	572
TCONS_00239746	Intergenic LncRNA	Chr15:10351260-10352517	252
TCONS_00241414	Intergenic LncRNA	Chr15:8561637-8562691	236
TCONS_00250933	Intergenic LncRNA	Chr16:124297-130077	311
TCONS_00262376	Intergenic LncRNA	Chr18:15620931-15639018	465
TCONS_00267119	Intergenic LncRNA	Chr18:6579158-6581999	1600
TCONS_00268291	Intergenic LncRNA	Chr18:1568499-1584526	1889
TCONS_00270184	Intergenic LncRNA	Chr18:15734705-15735941	686
TCONS_00270778	Intergenic LncRNA	Chr18:10247776-10250303	299
TCONS_00270894	Intergenic LncRNA	Chr18:2915693-2917283	297
TCONS_00273846	Intergenic LncRNA	Chr19:14761151-14763356	250
TCONS_00274808	Intergenic LncRNA	Chr19:2750869-2775764	1060
TCONS_00275309	Intergenic LncRNA	Chr19:3041746-3043322	444
TCONS_00281076	Intergenic LncRNA	scaffold_1264:1251-1620	277
TCONS_00282969	Intergenic LncRNA	scaffold_20:640076-706931	208
TCONS_00284096	Intergenic LncRNA	scaffold_25:261499-378057	337
TCONS_00286225	Intergenic LncRNA	scaffold_36:2023-54528	678
TCONS_00286231	Intergenic LncRNA	scaffold_36:2023-54528	492
TCONS_00286489	Intergenic LncRNA	scaffold_38:122218-122625	306
TCONS_00040878	Intron LncRNA	Chr02:12967459-12970767	208
TCONS_00054187	Intron LncRNA	Chr03:11756184-11764095	257
TCONS_00054220	Intron LncRNA	Chr03:12349224-12361054	526
TCONS_00055333	Intron LncRNA	Chr03:3895764-3909372	521
TCONS_00068130	Intron LncRNA	Chr03:11344492-11355137	464
TCONS_00070512	Intron LncRNA	Chr04:7862603-7868482	316
TCONS_00106809	Intron LncRNA	Chr06:23979121-23984955	716
TCONS_00121862	Intron LncRNA	Chr06:23979121-23984955	1012
TCONS_00130373	Intron LncRNA	Chr07:9412902-9414981	477
TCONS_00130654	Intron LncRNA	Chr07:4992412-5001208	432
TCONS_00131712	Intron LncRNA	Chr07:9412902-9414981	223
TCONS_00131714	Intron LncRNA	Chr07:9412902-9414981	256
TCONS_00145185	Intron LncRNA	Chr08:6805002-6827840	211
TCONS_00162148	Intron LncRNA	Chr09:6163995-6168295	261
TCONS_00172585	Intron LncRNA	Chr10:19155435-19162199	249
TCONS_00231384	Intron LncRNA	Chr15:840123-847885	223
TCONS_00232304	Intron LncRNA	Chr15:14941906-14945248	278
TCONS_00249000	Intron LncRNA	Chr16:5666324-5679482	348
TCONS_00267712	Intron LncRNA	Chr18:5542832-5543646	226
TCONS_00000287	Sense LncRNA	Chr01:3608820-3698469	315
TCONS_00001693	Sense LncRNA	Chr01:25775486-25778212	394
TCONS_00002467	Sense LncRNA	Chr01:36274600-36276680	539
TCONS_00003200	Sense LncRNA	Chr01:118071-124535	2461
TCONS_00003202	Sense LncRNA	Chr01:118071-124535	1988
TCONS_00003215	Sense LncRNA	Chr01:245612-248035	1128
TCONS_00003236	Sense LncRNA	Chr01:551268-553132	809
TCONS_00003297	Sense LncRNA	Chr01:1387330-1393732	2265
TCONS_00003382	Sense LncRNA	Chr01:2212516-2227905	1877
TCONS_00003426	Sense LncRNA	Chr01:2591066-2601832	1005
TCONS_00003445	Sense LncRNA	Chr01:2835087-2921340	976
TCONS_00003471	Sense LncRNA	Chr01:3209164-3211694	939
TCONS_00003480	Sense LncRNA	Chr01:3427236-3472347	375
TCONS_00003558	Sense LncRNA	Chr01:4085821-4088592	450
TCONS_00003591	Sense LncRNA	Chr01:4383997-4392296	3617
TCONS_00003599	Sense LncRNA	Chr01:4493878-4500423	1397
TCONS_00003631	Sense LncRNA	Chr01:5304394-5307189	1407
TCONS_00003633	Sense LncRNA	Chr01:5358560-5361624	1057
TCONS_00003667	Sense LncRNA	Chr01:5821586-5827533	643
TCONS_00003689	Sense LncRNA	Chr01:5977270-5986900	500
TCONS_00003703	Sense LncRNA	Chr01:6064334-6068765	230
TCONS_00003705	Sense LncRNA	Chr01:6064334-6068765	919
TCONS_00003750	Sense LncRNA	Chr01:6555960-6558562	1682
TCONS_00003751	Sense LncRNA	Chr01:6555960-6558562	1662
TCONS_00003842	Sense LncRNA	Chr01:7328633-7329801	292
TCONS_00003862	Sense LncRNA	Chr01:7501631-7504598	543
TCONS_00003888	Sense LncRNA	Chr01:7949958-7953114	480
TCONS_00003898	Sense LncRNA	Chr01:8217276-8223076	1439
TCONS_00003901	Sense LncRNA	Chr01:8217276-8223076	1143
TCONS_00003937	Sense LncRNA	Chr01:8701787-8706330	2106
TCONS_00003962	Sense LncRNA	Chr01:9172240-9177550	1036
TCONS_00003976	Sense LncRNA	Chr01:9307056-9314898	912
TCONS_00003985	Sense LncRNA	Chr01:9376027-9386443	976
TCONS_00004002	Sense LncRNA	Chr01:9544100-9547961	1166
TCONS_00004003	Sense LncRNA	Chr01:9544100-9547961	1214
TCONS_00004015	Sense LncRNA	Chr01:9691002-9695537	1582
TCONS_00004020	Sense LncRNA	Chr01:9750079-9753335	1615
TCONS_00004061	Sense LncRNA	Chr01:10238986-10246369	768
TCONS_00004098	Sense LncRNA	Chr01:10651345-10656787	1630
TCONS_00004104	Sense LncRNA	Chr01:10670782-10674359	1398
TCONS_00004119	Sense LncRNA	Chr01:10738970-10741534	289
TCONS_00004165	Sense LncRNA	Chr01:11114468-11116531	275
TCONS_00004215	Sense LncRNA	Chr01:11787503-11789083	533
TCONS_00004267	Sense LncRNA	Chr01:12284894-12289383	927
TCONS_00004283	Sense LncRNA	Chr01:12338822-12341270	531
TCONS_00004323	Sense LncRNA	Chr01:12664439-12668016	482
TCONS_00004331	Sense LncRNA	Chr01:12787433-12790197	1915
TCONS_00004390	Sense LncRNA	Chr01:13935156-13940543	1298
TCONS_00004395	Sense LncRNA	Chr01:13984786-13988207	435
TCONS_00004464	Sense LncRNA	Chr01:15248282-15266293	1689
TCONS_00004531	Sense LncRNA	Chr01:16103899-16108963	1404
TCONS_00004542	Sense LncRNA	Chr01:16338960-16344584	435
TCONS_00004550	Sense LncRNA	Chr01:16503436-16506322	660
TCONS_00004604	Sense LncRNA	Chr01:17650393-17655906	2047
TCONS_00004624	Sense LncRNA	Chr01:18691531-18698276	784
TCONS_00004627	Sense LncRNA	Chr01:19011899-19021072	1902
TCONS_00004629	Sense LncRNA	Chr01:19011899-19021072	1355
TCONS_00004664	Sense LncRNA	Chr01:19727002-19738241	1122
TCONS_00004795	Sense LncRNA	Chr01:21996006-22003122	1253
TCONS_00004811	Sense LncRNA	Chr01:22537014-22541923	1107
TCONS_00004832	Sense LncRNA	Chr01:23557098-23572729	340
TCONS_00004860	Sense LncRNA	Chr01:24342541-24343563	873
TCONS_00004899	Sense LncRNA	Chr01:24727975-24729343	272
TCONS_00004913	Sense LncRNA	Chr01:24838293-24842440	1530
TCONS_00004914	Sense LncRNA	Chr01:24838293-24842440	1508
TCONS_00004929	Sense LncRNA	Chr01:25027859-25029692	906
TCONS_00004961	Sense LncRNA	Chr01:25524257-25526162	1011
TCONS_00005005	Sense LncRNA	Chr01:26293548-26299655	1298
TCONS_00005006	Sense LncRNA	Chr01:26293548-26299655	252
TCONS_00005016	Sense LncRNA	Chr01:26342500-26362609	1111
TCONS_00005020	Sense LncRNA	Chr01:26367155-26377198	441
TCONS_00005023	Sense LncRNA	Chr01:26433897-26439875	379
TCONS_00005150	Sense LncRNA	Chr01:27941678-27944090	935
TCONS_00005178	Sense LncRNA	Chr01:28309264-28313776	2647
TCONS_00005221	Sense LncRNA	Chr01:28939251-28985529	512
TCONS_00005223	Sense LncRNA	Chr01:28939251-28985529	1081
TCONS_00005228	Sense LncRNA	Chr01:29102934-29132468	1233
TCONS_00005246	Sense LncRNA	Chr01:29339260-29344566	1397
TCONS_00005247	Sense LncRNA	Chr01:29339260-29344566	1797
TCONS_00005249	Sense LncRNA	Chr01:29345883-29351774	524
TCONS_00005332	Sense LncRNA	Chr01:30578712-30582283	774
TCONS_00005351	Sense LncRNA	Chr01:30874726-30880522	2373
TCONS_00005510	Sense LncRNA	Chr01:33365067-33368877	739
TCONS_00005512	Sense LncRNA	Chr01:33365067-33368877	509
TCONS_00005599	Sense LncRNA	Chr01:34702845-34714115	361
TCONS_00005682	Sense LncRNA	Chr01:35980478-35987415	2014
TCONS_00005694	Sense LncRNA	Chr01:36084030-36087740	918
TCONS_00005708	Sense LncRNA	Chr01:36205808-36209713	1184
TCONS_00005724	Sense LncRNA	Chr01:36381082-36386673	1657
TCONS_00005730	Sense LncRNA	Chr01:36600838-36606365	659
TCONS_00005757	Sense LncRNA	Chr01:37026369-37045416	1016
TCONS_00005763	Sense LncRNA	Chr01:37165730-37209102	429
TCONS_00005770	Sense LncRNA	Chr01:37165730-37209102	457
TCONS_00005821	Sense LncRNA	Chr01:37886737-37900392	745
TCONS_00005823	Sense LncRNA	Chr01:37943746-37947687	859
TCONS_00005824	Sense LncRNA	Chr01:37943746-37947687	665
TCONS_00005849	Sense LncRNA	Chr01:38397505-38429906	787
TCONS_00005851	Sense LncRNA	Chr01:38397505-38429906	680
TCONS_00005852	Sense LncRNA	Chr01:38438396-38444987	1800
TCONS_00005877	Sense LncRNA	Chr01:38800444-38806201	247
TCONS_00005920	Sense LncRNA	Chr01:39576263-39583668	1120
TCONS_00005969	Sense LncRNA	Chr01:40341733-40346697	357
TCONS_00006105	Sense LncRNA	Chr01:42862899-42864981	686
TCONS_00006110	Sense LncRNA	Chr01:42917802-42921690	539
TCONS_00006111	Sense LncRNA	Chr01:42917802-42921690	612
TCONS_00006112	Sense LncRNA	Chr01:42917802-42921690	381
TCONS_00006155	Sense LncRNA	Chr01:43425226-43428890	1229
TCONS_00006241	Sense LncRNA	Chr01:44844731-44850558	492
TCONS_00006425	Sense LncRNA	Chr01:48584542-48585947	543
TCONS_00006453	Sense LncRNA	Chr01:48849969-48877379	984
TCONS_00006471	Sense LncRNA	Chr01:49098156-49102288	400
TCONS_00006477	Sense LncRNA	Chr01:49151992-49157572	1987
TCONS_00006484	Sense LncRNA	Chr01:49213956-49218054	1014
TCONS_00006494	Sense LncRNA	Chr01:49390486-49394871	1413
TCONS_00006669	Sense LncRNA	Chr01:2699371-2745395	281
TCONS_00007962	Sense LncRNA	Chr01:308122-317967	3891
TCONS_00008013	Sense LncRNA	Chr01:1725460-1730296	1055
TCONS_00008048	Sense LncRNA	Chr01:2212516-2227905	1644
TCONS_00008171	Sense LncRNA	Chr01:5358560-5361624	911
TCONS_00008237	Sense LncRNA	Chr01:6864784-6871577	1248
TCONS_00008275	Sense LncRNA	Chr01:7379929-7383583	1529
TCONS_00008280	Sense LncRNA	Chr01:7501631-7504598	540
TCONS_00008330	Sense LncRNA	Chr01:9006508-9016303	2173
TCONS_00008332	Sense LncRNA	Chr01:9088337-9090567	1403
TCONS_00008382	Sense LncRNA	Chr01:10268781-10273847	485
TCONS_00008389	Sense LncRNA	Chr01:10428704-10436528	358
TCONS_00008400	Sense LncRNA	Chr01:10651345-10656787	1101
TCONS_00008423	Sense LncRNA	Chr01:10969498-10977258	2118
TCONS_00008446	Sense LncRNA	Chr01:11698167-11700586	499
TCONS_00008505	Sense LncRNA	Chr01:13518975-13522582	1086
TCONS_00008525	Sense LncRNA	Chr01:13976542-13980975	1725
TCONS_00008636	Sense LncRNA	Chr01:19570203-19579987	741
TCONS_00008645	Sense LncRNA	Chr01:19681950-19692024	429
TCONS_00008665	Sense LncRNA	Chr01:20662692-20669122	1957
TCONS_00008704	Sense LncRNA	Chr01:22537014-22541923	450
TCONS_00008761	Sense LncRNA	Chr01:25404322-25407458	312
TCONS_00008765	Sense LncRNA	Chr01:25520040-25524092	488
TCONS_00008785	Sense LncRNA	Chr01:26293548-26299655	346
TCONS_00008876	Sense LncRNA	Chr01:28802837-28805179	732
TCONS_00008892	Sense LncRNA	Chr01:29238144-29241785	1142
TCONS_00008894	Sense LncRNA	Chr01:29238144-29241785	1054
TCONS_00008903	Sense LncRNA	Chr01:29772405-29774800	342
TCONS_00008922	Sense LncRNA	Chr01:30434212-30439142	767
TCONS_00009031	Sense LncRNA	Chr01:34830547-34839291	948
TCONS_00009045	Sense LncRNA	Chr01:35214262-35219101	1548
TCONS_00009062	Sense LncRNA	Chr01:35980478-35987415	887
TCONS_00009072	Sense LncRNA	Chr01:36138098-36146778	671
TCONS_00009089	Sense LncRNA	Chr01:36770586-36775130	1615
TCONS_00009102	Sense LncRNA	Chr01:37165730-37209102	258
TCONS_00009134	Sense LncRNA	Chr01:38085813-38090779	974
TCONS_00009146	Sense LncRNA	Chr01:38489129-38494974	229
TCONS_00009163	Sense LncRNA	Chr01:39284325-39289831	1319
TCONS_00009165	Sense LncRNA	Chr01:39492516-39496779	851
TCONS_00009177	Sense LncRNA	Chr01:39753446-39781535	1058
TCONS_00009183	Sense LncRNA	Chr01:39951234-39955670	3088
TCONS_00009205	Sense LncRNA	Chr01:41557956-41620588	483
TCONS_00009267	Sense LncRNA	Chr01:44240507-44248271	1445
TCONS_00009313	Sense LncRNA	Chr01:46073463-46076506	710
TCONS_00009361	Sense LncRNA	Chr01:48421058-48423936	1576
TCONS_00009393	Sense LncRNA	Chr01:49151992-49157572	471
TCONS_00009401	Sense LncRNA	Chr01:49390486-49394871	1385
TCONS_00010421	Sense LncRNA	Chr01:101245-104082	853
TCONS_00010490	Sense LncRNA	Chr01:2212516-2227905	2446
TCONS_00010519	Sense LncRNA	Chr01:3543334-3548006	999
TCONS_00010522	Sense LncRNA	Chr01:3703357-3719669	286
TCONS_00010554	Sense LncRNA	Chr01:5358560-5361624	385
TCONS_00010555	Sense LncRNA	Chr01:5358560-5361624	469
TCONS_00010563	Sense LncRNA	Chr01:5657704-5662215	917
TCONS_00010567	Sense LncRNA	Chr01:5759398-5761814	654
TCONS_00010590	Sense LncRNA	Chr01:6351079-6360148	489
TCONS_00010612	Sense LncRNA	Chr01:6962581-6966122	1924
TCONS_00010664	Sense LncRNA	Chr01:9006508-9016303	1049
TCONS_00010667	Sense LncRNA	Chr01:9240651-9243061	598
TCONS_00010692	Sense LncRNA	Chr01:10079758-10086985	1649
TCONS_00010705	Sense LncRNA	Chr01:10542977-10547475	403
TCONS_00010737	Sense LncRNA	Chr01:11866572-11876308	837
TCONS_00010770	Sense LncRNA	Chr01:12976598-12977595	795
TCONS_00010780	Sense LncRNA	Chr01:13540003-13545260	731
TCONS_00010802	Sense LncRNA	Chr01:14349674-14356884	1164
TCONS_00010806	Sense LncRNA	Chr01:14602634-14616134	1348
TCONS_00010808	Sense LncRNA	Chr01:14602634-14616134	1097
TCONS_00010838	Sense LncRNA	Chr01:16047783-16053473	1714
TCONS_00010856	Sense LncRNA	Chr01:18237077-18245157	761
TCONS_00010858	Sense LncRNA	Chr01:18984443-18995748	891
TCONS_00010864	Sense LncRNA	Chr01:19373236-19381579	535
TCONS_00010879	Sense LncRNA	Chr01:20225032-20237002	926
TCONS_00010902	Sense LncRNA	Chr01:21159772-21169996	530
TCONS_00010903	Sense LncRNA	Chr01:21159772-21169996	2353
TCONS_00010920	Sense LncRNA	Chr01:22029152-22033691	371
TCONS_00010926	Sense LncRNA	Chr01:23063116-23070172	1131
TCONS_00010930	Sense LncRNA	Chr01:24193251-24213661	3542
TCONS_00010942	Sense LncRNA	Chr01:24675040-24679978	1123
TCONS_00010978	Sense LncRNA	Chr01:26342500-26362609	803
TCONS_00011035	Sense LncRNA	Chr01:29318669-29321520	795
TCONS_00011043	Sense LncRNA	Chr01:30231899-30236653	815
TCONS_00011051	Sense LncRNA	Chr01:30578712-30582283	782
TCONS_00011054	Sense LncRNA	Chr01:30591042-30594081	840
TCONS_00011071	Sense LncRNA	Chr01:32204625-32209269	1091
TCONS_00011119	Sense LncRNA	Chr01:34777769-34786142	1179
TCONS_00011125	Sense LncRNA	Chr01:34947733-34951965	1047
TCONS_00011128	Sense LncRNA	Chr01:35012524-35016158	797
TCONS_00011166	Sense LncRNA	Chr01:37003219-37009609	1761
TCONS_00011172	Sense LncRNA	Chr01:37165730-37209102	824
TCONS_00011173	Sense LncRNA	Chr01:37165730-37209102	520
TCONS_00011193	Sense LncRNA	Chr01:38085813-38090779	408
TCONS_00011194	Sense LncRNA	Chr01:38334237-38339873	914
TCONS_00011232	Sense LncRNA	Chr01:41328501-41335664	1285
TCONS_00011310	Sense LncRNA	Chr01:48372431-48376756	1337
TCONS_00011348	Sense LncRNA	Chr01:50012502-50016110	841
TCONS_00011405	Sense LncRNA	Chr01:1614386-1618340	364
TCONS_00012392	Sense LncRNA	Chr01:172363-185890	240
TCONS_00012457	Sense LncRNA	Chr01:2258645-2276385	759
TCONS_00012481	Sense LncRNA	Chr01:3176446-3182995	776
TCONS_00012482	Sense LncRNA	Chr01:3176446-3182995	1268
TCONS_00012490	Sense LncRNA	Chr01:3591704-3595497	469
TCONS_00012507	Sense LncRNA	Chr01:3859454-3862178	1130
TCONS_00012512	Sense LncRNA	Chr01:3997162-4001140	386
TCONS_00012513	Sense LncRNA	Chr01:3997162-4001140	345
TCONS_00012526	Sense LncRNA	Chr01:4268229-4272395	523
TCONS_00012528	Sense LncRNA	Chr01:4383997-4392296	3229
TCONS_00012589	Sense LncRNA	Chr01:6719258-6721426	376
TCONS_00012611	Sense LncRNA	Chr01:7328633-7329801	382
TCONS_00012703	Sense LncRNA	Chr01:10738970-10741534	321
TCONS_00012714	Sense LncRNA	Chr01:10993543-10996919	681
TCONS_00012764	Sense LncRNA	Chr01:12330392-12332713	506
TCONS_00012799	Sense LncRNA	Chr01:13910830-13924143	1768
TCONS_00012868	Sense LncRNA	Chr01:17530454-17535519	779
TCONS_00012886	Sense LncRNA	Chr01:19747748-19757429	396
TCONS_00012944	Sense LncRNA	Chr01:23517281-23519809	1708
TCONS_00012956	Sense LncRNA	Chr01:24193251-24213661	1022
TCONS_00012971	Sense LncRNA	Chr01:24631320-24640544	683
TCONS_00012976	Sense LncRNA	Chr01:24844081-24849117	1028
TCONS_00012987	Sense LncRNA	Chr01:25520040-25524092	710
TCONS_00012988	Sense LncRNA	Chr01:25524257-25526162	498
TCONS_00013097	Sense LncRNA	Chr01:29339260-29344566	1150
TCONS_00013105	Sense LncRNA	Chr01:29619687-29707238	635
TCONS_00013108	Sense LncRNA	Chr01:29776221-29777309	220
TCONS_00013166	Sense LncRNA	Chr01:32483485-32488401	362
TCONS_00013192	Sense LncRNA	Chr01:33365067-33368877	1060
TCONS_00013193	Sense LncRNA	Chr01:33365067-33368877	1210
TCONS_00013195	Sense LncRNA	Chr01:33399375-33402099	503
TCONS_00013232	Sense LncRNA	Chr01:35274856-35276789	1397
TCONS_00013274	Sense LncRNA	Chr01:37165730-37209102	340
TCONS_00013297	Sense LncRNA	Chr01:38085813-38090779	710
TCONS_00013311	Sense LncRNA	Chr01:38800444-38806201	610
TCONS_00013337	Sense LncRNA	Chr01:41164610-41186607	1282
TCONS_00013359	Sense LncRNA	Chr01:42527314-42531360	621
TCONS_00013373	Sense LncRNA	Chr01:43096332-43102725	1043
TCONS_00013392	Sense LncRNA	Chr01:44233587-44237544	823
TCONS_00013438	Sense LncRNA	Chr01:46691780-46696446	296
TCONS_00013467	Sense LncRNA	Chr01:48849969-48877379	375
TCONS_00013468	Sense LncRNA	Chr01:48906317-48910908	1533
TCONS_00013494	Sense LncRNA	Chr01:49888317-49893089	704
TCONS_00014275	Sense LncRNA	Chr01:40001052-40198793	269
TCONS_00014398	Sense LncRNA	Chr01:568518-581571	2016
TCONS_00014436	Sense LncRNA	Chr01:2208449-2211619	432
TCONS_00014444	Sense LncRNA	Chr01:2419694-2425122	394
TCONS_00014478	Sense LncRNA	Chr01:3929303-3941208	574
TCONS_00014483	Sense LncRNA	Chr01:4085821-4088592	626
TCONS_00014501	Sense LncRNA	Chr01:4493878-4500423	693
TCONS_00014503	Sense LncRNA	Chr01:4493878-4500423	727
TCONS_00014527	Sense LncRNA	Chr01:5727717-5732294	791
TCONS_00014554	Sense LncRNA	Chr01:6633245-6635508	652
TCONS_00014558	Sense LncRNA	Chr01:6823542-6825491	448
TCONS_00014564	Sense LncRNA	Chr01:6994415-6999057	2118
TCONS_00014580	Sense LncRNA	Chr01:7355666-7363737	709
TCONS_00014597	Sense LncRNA	Chr01:8217276-8223076	411
TCONS_00014655	Sense LncRNA	Chr01:10517931-10519466	774
TCONS_00014669	Sense LncRNA	Chr01:10856660-10863667	1625
TCONS_00014694	Sense LncRNA	Chr01:11519162-11522724	1247
TCONS_00014708	Sense LncRNA	Chr01:11922778-11929960	605
TCONS_00014715	Sense LncRNA	Chr01:12342410-12348823	689
TCONS_00014751	Sense LncRNA	Chr01:14349674-14356884	380
TCONS_00014773	Sense LncRNA	Chr01:15382049-15388421	504
TCONS_00014808	Sense LncRNA	Chr01:19011899-19021072	903
TCONS_00014841	Sense LncRNA	Chr01:20868227-20873468	1402
TCONS_00014891	Sense LncRNA	Chr01:24631320-24640544	2437
TCONS_00014909	Sense LncRNA	Chr01:25734793-25740644	991
TCONS_00014910	Sense LncRNA	Chr01:25734793-25740644	221
TCONS_00014924	Sense LncRNA	Chr01:26342500-26362609	467
TCONS_00014960	Sense LncRNA	Chr01:28081926-28105539	350
TCONS_00014968	Sense LncRNA	Chr01:28628392-28630518	425
TCONS_00015001	Sense LncRNA	Chr01:30709419-30714718	904
TCONS_00015036	Sense LncRNA	Chr01:32913991-32917240	1018
TCONS_00015054	Sense LncRNA	Chr01:33847381-33852107	1310
TCONS_00015057	Sense LncRNA	Chr01:34028145-34031968	930
TCONS_00015090	Sense LncRNA	Chr01:35096624-35102322	1218
TCONS_00015123	Sense LncRNA	Chr01:36837586-36841256	1383
TCONS_00015177	Sense LncRNA	Chr01:38800444-38806201	1132
TCONS_00015199	Sense LncRNA	Chr01:39951234-39955670	2285
TCONS_00015213	Sense LncRNA	Chr01:42121923-42128691	509
TCONS_00015220	Sense LncRNA	Chr01:42527314-42531360	518
TCONS_00015221	Sense LncRNA	Chr01:42596196-42599968	611
TCONS_00015256	Sense LncRNA	Chr01:44607651-44609372	226
TCONS_00015272	Sense LncRNA	Chr01:46049683-46054491	1194
TCONS_00015277	Sense LncRNA	Chr01:46770164-46778768	445
TCONS_00015294	Sense LncRNA	Chr01:48306873-48315618	1370
TCONS_00015325	Sense LncRNA	Chr01:50042381-50046583	751
TCONS_00015334	Sense LncRNA	Chr01:50288666-50297275	368
TCONS_00015337	Sense LncRNA	Chr01:50288666-50297275	350
TCONS_00016196	Sense LncRNA	Chr01:32364629-32372448	428
TCONS_00016578	Sense LncRNA	Chr01:672969-677163	592
TCONS_00016617	Sense LncRNA	Chr01:2068100-2069535	768
TCONS_00016650	Sense LncRNA	Chr01:3224690-3228789	365
TCONS_00016651	Sense LncRNA	Chr01:3224690-3228789	638
TCONS_00016684	Sense LncRNA	Chr01:3997162-4001140	327
TCONS_00016708	Sense LncRNA	Chr01:5285113-5295708	1420
TCONS_00016711	Sense LncRNA	Chr01:5358560-5361624	518
TCONS_00016776	Sense LncRNA	Chr01:7146273-7151251	843
TCONS_00016809	Sense LncRNA	Chr01:8384169-8386280	206
TCONS_00016838	Sense LncRNA	Chr01:9407684-9416201	1010
TCONS_00016844	Sense LncRNA	Chr01:9729138-9737539	1659
TCONS_00016865	Sense LncRNA	Chr01:10440743-10445074	1269
TCONS_00016952	Sense LncRNA	Chr01:12557132-12563919	497
TCONS_00016994	Sense LncRNA	Chr01:14349674-14356884	936
TCONS_00017002	Sense LncRNA	Chr01:14602634-14616134	885
TCONS_00017003	Sense LncRNA	Chr01:14602634-14616134	544
TCONS_00017033	Sense LncRNA	Chr01:16135550-16137834	650
TCONS_00017056	Sense LncRNA	Chr01:18237077-18245157	975
TCONS_00017062	Sense LncRNA	Chr01:18984443-18995748	984
TCONS_00017121	Sense LncRNA	Chr01:21444082-21464619	1246
TCONS_00017166	Sense LncRNA	Chr01:23854166-23859135	3180
TCONS_00017173	Sense LncRNA	Chr01:24193251-24213661	1479
TCONS_00017189	Sense LncRNA	Chr01:24715176-24721238	450
TCONS_00017212	Sense LncRNA	Chr01:25620087-25628354	930
TCONS_00017225	Sense LncRNA	Chr01:26285633-26290842	1867
TCONS_00017238	Sense LncRNA	Chr01:26367155-26377198	784
TCONS_00017300	Sense LncRNA	Chr01:28852327-28855596	522
TCONS_00017358	Sense LncRNA	Chr01:30091440-30095827	505
TCONS_00017381	Sense LncRNA	Chr01:30578712-30582283	979
TCONS_00017404	Sense LncRNA	Chr01:32204625-32209269	1836
TCONS_00017428	Sense LncRNA	Chr01:32748398-32751445	736
TCONS_00017459	Sense LncRNA	Chr01:33847381-33852107	744
TCONS_00017464	Sense LncRNA	Chr01:34066099-34071572	772
TCONS_00017465	Sense LncRNA	Chr01:34238124-34243537	1018
TCONS_00017467	Sense LncRNA	Chr01:34238124-34243537	735
TCONS_00017562	Sense LncRNA	Chr01:37165730-37209102	608
TCONS_00017564	Sense LncRNA	Chr01:37165730-37209102	2003
TCONS_00017568	Sense LncRNA	Chr01:37334896-37337635	1874
TCONS_00017586	Sense LncRNA	Chr01:38469467-38473823	1518
TCONS_00017594	Sense LncRNA	Chr01:38760194-38764655	605
TCONS_00017600	Sense LncRNA	Chr01:39239385-39247445	276
TCONS_00017609	Sense LncRNA	Chr01:39492516-39496779	2647
TCONS_00017639	Sense LncRNA	Chr01:40271856-40280907	735
TCONS_00017641	Sense LncRNA	Chr01:40349659-40354779	1949
TCONS_00017654	Sense LncRNA	Chr01:41971986-41990849	328
TCONS_00017683	Sense LncRNA	Chr01:43076589-43079895	550
TCONS_00017718	Sense LncRNA	Chr01:44582317-44585163	1106
TCONS_00017773	Sense LncRNA	Chr01:48306873-48315618	1679
TCONS_00017780	Sense LncRNA	Chr01:48832776-48836209	511
TCONS_00017802	Sense LncRNA	Chr01:49390486-49394871	1171
TCONS_00017812	Sense LncRNA	Chr01:49888317-49893089	1003
TCONS_00017818	Sense LncRNA	Chr01:49908170-49913076	368
TCONS_00017830	Sense LncRNA	Chr01:50219130-50233819	424
TCONS_00018564	Sense LncRNA	Chr01:690030-718833	707
TCONS_00018594	Sense LncRNA	Chr01:1835260-1838879	2819
TCONS_00018596	Sense LncRNA	Chr01:1842462-1845548	983
TCONS_00018610	Sense LncRNA	Chr01:2495960-2517023	1326
TCONS_00018650	Sense LncRNA	Chr01:4381010-4382241	811
TCONS_00018669	Sense LncRNA	Chr01:5727717-5732294	953
TCONS_00018874	Sense LncRNA	Chr01:15846221-15847471	787
TCONS_00018877	Sense LncRNA	Chr01:16047783-16053473	1428
TCONS_00018991	Sense LncRNA	Chr01:25094438-25096759	759
TCONS_00019064	Sense LncRNA	Chr01:29550598-29554627	971
TCONS_00019120	Sense LncRNA	Chr01:33951673-33957601	1110
TCONS_00019173	Sense LncRNA	Chr01:36138098-36146778	1853
TCONS_00019180	Sense LncRNA	Chr01:36331897-36334750	1175
TCONS_00019204	Sense LncRNA	Chr01:37428916-37448076	898
TCONS_00019230	Sense LncRNA	Chr01:39355162-39362051	2725
TCONS_00019231	Sense LncRNA	Chr01:39576263-39583668	2851
TCONS_00019323	Sense LncRNA	Chr01:48849969-48877379	440
TCONS_00019325	Sense LncRNA	Chr01:48849969-48877379	332
TCONS_00019354	Sense LncRNA	Chr01:49908170-49913076	565
TCONS_00019374	Sense LncRNA	Chr01:50403612-50409335	3179
TCONS_00019834	Sense LncRNA	Chr01:19221366-19225775	410
TCONS_00020462	Sense LncRNA	Chr01:8297-12352	449
TCONS_00020491	Sense LncRNA	Chr01:690030-718833	780
TCONS_00020513	Sense LncRNA	Chr01:1239321-1241981	1872
TCONS_00020521	Sense LncRNA	Chr01:1725460-1730296	1212
TCONS_00020553	Sense LncRNA	Chr01:2495960-2517023	1303
TCONS_00020607	Sense LncRNA	Chr01:4166966-4171270	1104
TCONS_00020624	Sense LncRNA	Chr01:4892702-4897138	897
TCONS_00020641	Sense LncRNA	Chr01:5828431-5834170	1259
TCONS_00020649	Sense LncRNA	Chr01:5977270-5986900	775
TCONS_00020655	Sense LncRNA	Chr01:6129707-6130662	673
TCONS_00020811	Sense LncRNA	Chr01:10787141-10834876	1288
TCONS_00020831	Sense LncRNA	Chr01:11348403-11350286	1595
TCONS_00020834	Sense LncRNA	Chr01:11648012-11652068	1595
TCONS_00020854	Sense LncRNA	Chr01:12100191-12110308	3122
TCONS_00020864	Sense LncRNA	Chr01:12330392-12332713	677
TCONS_00020868	Sense LncRNA	Chr01:12557132-12563919	711
TCONS_00020870	Sense LncRNA	Chr01:12664439-12668016	1266
TCONS_00020910	Sense LncRNA	Chr01:15193867-15196634	1002
TCONS_00020911	Sense LncRNA	Chr01:15248282-15266293	1931
TCONS_00020926	Sense LncRNA	Chr01:15846221-15847471	882
TCONS_00020938	Sense LncRNA	Chr01:16648852-16649792	423
TCONS_00021026	Sense LncRNA	Chr01:21996006-22003122	1369
TCONS_00021062	Sense LncRNA	Chr01:24359329-24364051	1024
TCONS_00021063	Sense LncRNA	Chr01:24514556-24516949	1265
TCONS_00021246	Sense LncRNA	Chr01:32882153-32889726	500
TCONS_00021291	Sense LncRNA	Chr01:34947733-34951965	2103
TCONS_00021299	Sense LncRNA	Chr01:35342900-35344982	577
TCONS_00021313	Sense LncRNA	Chr01:36138098-36146778	758
TCONS_00021374	Sense LncRNA	Chr01:37886737-37900392	232
TCONS_00021387	Sense LncRNA	Chr01:38397505-38429906	640
TCONS_00021390	Sense LncRNA	Chr01:38536520-38543257	3915
TCONS_00021391	Sense LncRNA	Chr01:38536520-38543257	3810
TCONS_00021446	Sense LncRNA	Chr01:40349659-40354779	1880
TCONS_00021461	Sense LncRNA	Chr01:41257676-41261408	1753
TCONS_00021496	Sense LncRNA	Chr01:42608630-42616063	1794
TCONS_00021505	Sense LncRNA	Chr01:42862899-42864981	560
TCONS_00022074	Sense LncRNA	Chr01:23793924-23833914	522
TCONS_00022542	Sense LncRNA	Chr01:339987-347238	641
TCONS_00022559	Sense LncRNA	Chr01:672969-677163	632
TCONS_00022598	Sense LncRNA	Chr01:2495960-2517023	782
TCONS_00022609	Sense LncRNA	Chr01:2835087-2921340	317
TCONS_00022627	Sense LncRNA	Chr01:2976321-2994358	209
TCONS_00022795	Sense LncRNA	Chr01:8701787-8706330	2285
TCONS_00022821	Sense LncRNA	Chr01:10428704-10436528	2715
TCONS_00022842	Sense LncRNA	Chr01:10969498-10977258	2257
TCONS_00022850	Sense LncRNA	Chr01:11381371-11384562	987
TCONS_00022926	Sense LncRNA	Chr01:15164188-15164891	296
TCONS_00022992	Sense LncRNA	Chr01:19727002-19738241	291
TCONS_00023014	Sense LncRNA	Chr01:21377204-21382990	2304
TCONS_00023055	Sense LncRNA	Chr01:24605868-24608518	747
TCONS_00023069	Sense LncRNA	Chr01:25027859-25029692	900
TCONS_00023070	Sense LncRNA	Chr01:25027859-25029692	945
TCONS_00023189	Sense LncRNA	Chr01:30397899-30401937	290
TCONS_00023246	Sense LncRNA	Chr01:34238124-34243537	1108
TCONS_00023250	Sense LncRNA	Chr01:34364305-34367039	876
TCONS_00023265	Sense LncRNA	Chr01:35860300-35863632	800
TCONS_00023359	Sense LncRNA	Chr01:40001052-40198793	335
TCONS_00023372	Sense LncRNA	Chr01:40349659-40354779	1070
TCONS_00023379	Sense LncRNA	Chr01:41257676-41261408	671
TCONS_00023391	Sense LncRNA	Chr01:41971986-41990849	420
TCONS_00023430	Sense LncRNA	Chr01:43745471-43751692	1651
TCONS_00023457	Sense LncRNA	Chr01:46147936-46194885	1586
TCONS_00023483	Sense LncRNA	Chr01:48337425-48340613	1597
TCONS_00024111	Sense LncRNA	Chr01:568518-581571	1457
TCONS_00024113	Sense LncRNA	Chr01:568518-581571	855
TCONS_00024122	Sense LncRNA	Chr01:764274-800644	1026
TCONS_00024133	Sense LncRNA	Chr01:1090614-1098030	999
TCONS_00024140	Sense LncRNA	Chr01:1818263-1823310	542
TCONS_00024194	Sense LncRNA	Chr01:5727717-5732294	1374
TCONS_00024198	Sense LncRNA	Chr01:5759398-5761814	1035
TCONS_00024222	Sense LncRNA	Chr01:6906270-6912767	998
TCONS_00024227	Sense LncRNA	Chr01:6975182-6978512	757
TCONS_00024234	Sense LncRNA	Chr01:7120338-7122675	1281
TCONS_00024251	Sense LncRNA	Chr01:9025354-9028979	1308
TCONS_00024257	Sense LncRNA	Chr01:9524233-9525972	989
TCONS_00024290	Sense LncRNA	Chr01:11898336-11904628	353
TCONS_00024291	Sense LncRNA	Chr01:12100191-12110308	565
TCONS_00024312	Sense LncRNA	Chr01:13900662-13908729	661
TCONS_00024314	Sense LncRNA	Chr01:13900662-13908729	893
TCONS_00024331	Sense LncRNA	Chr01:15447709-15458903	1913
TCONS_00024339	Sense LncRNA	Chr01:16103899-16108963	2106
TCONS_00024356	Sense LncRNA	Chr01:19011899-19021072	1741
TCONS_00024386	Sense LncRNA	Chr01:21862538-21868921	336
TCONS_00024423	Sense LncRNA	Chr01:25352876-25354962	779
TCONS_00024452	Sense LncRNA	Chr01:27679957-27687402	1729
TCONS_00024458	Sense LncRNA	Chr01:27951078-27958732	592
TCONS_00024467	Sense LncRNA	Chr01:28081926-28105539	847
TCONS_00024476	Sense LncRNA	Chr01:30053118-30054155	495
TCONS_00024493	Sense LncRNA	Chr01:32112064-32113009	221
TCONS_00024513	Sense LncRNA	Chr01:33744020-33751699	859
TCONS_00024517	Sense LncRNA	Chr01:34066099-34071572	1244
TCONS_00024518	Sense LncRNA	Chr01:34066099-34071572	509
TCONS_00024526	Sense LncRNA	Chr01:34846245-34854739	2691
TCONS_00024546	Sense LncRNA	Chr01:35980478-35987415	892
TCONS_00024569	Sense LncRNA	Chr01:37165730-37209102	462
TCONS_00024570	Sense LncRNA	Chr01:37165730-37209102	1502
TCONS_00024586	Sense LncRNA	Chr01:38438396-38444987	693
TCONS_00024595	Sense LncRNA	Chr01:39576263-39583668	3285
TCONS_00024620	Sense LncRNA	Chr01:42917802-42921690	1217
TCONS_00024648	Sense LncRNA	Chr01:48849969-48877379	912
TCONS_00024661	Sense LncRNA	Chr01:49357106-49365845	1570
TCONS_00024688	Sense LncRNA	Chr01:351823-353408	213
TCONS_00024896	Sense LncRNA	Chr01:10522230-10525417	354
TCONS_00025160	Sense LncRNA	Chr01:29377718-29380360	393
TCONS_00025453	Sense LncRNA	Chr01:118071-124535	2642
TCONS_00025460	Sense LncRNA	Chr01:568518-581571	1421
TCONS_00025487	Sense LncRNA	Chr01:1239321-1241981	1640
TCONS_00025492	Sense LncRNA	Chr01:1755642-1760985	947
TCONS_00025493	Sense LncRNA	Chr01:1795887-1799560	475
TCONS_00025509	Sense LncRNA	Chr01:2457486-2461167	370
TCONS_00025512	Sense LncRNA	Chr01:2495960-2517023	1359
TCONS_00025534	Sense LncRNA	Chr01:3028051-3035921	1609
TCONS_00025542	Sense LncRNA	Chr01:3703357-3719669	1392
TCONS_00025559	Sense LncRNA	Chr01:4140191-4145651	508
TCONS_00025567	Sense LncRNA	Chr01:4631674-4637290	1728
TCONS_00025581	Sense LncRNA	Chr01:5821586-5827533	370
TCONS_00025597	Sense LncRNA	Chr01:6457590-6465192	1120
TCONS_00025616	Sense LncRNA	Chr01:7125702-7132794	527
TCONS_00025622	Sense LncRNA	Chr01:7339509-7341324	849
TCONS_00025638	Sense LncRNA	Chr01:7961481-7964370	1310
TCONS_00025645	Sense LncRNA	Chr01:8217276-8223076	574
TCONS_00025718	Sense LncRNA	Chr01:11519162-11522724	1226
TCONS_00025728	Sense LncRNA	Chr01:11979561-11982513	592
TCONS_00025743	Sense LncRNA	Chr01:12778890-12782535	924
TCONS_00025749	Sense LncRNA	Chr01:13642626-13654294	4608
TCONS_00025755	Sense LncRNA	Chr01:14143926-14145990	515
TCONS_00025765	Sense LncRNA	Chr01:14787050-14791240	1904
TCONS_00025776	Sense LncRNA	Chr01:15542197-15545350	1419
TCONS_00025782	Sense LncRNA	Chr01:15773199-15776857	849
TCONS_00025808	Sense LncRNA	Chr01:17702195-17713442	355
TCONS_00025860	Sense LncRNA	Chr01:24193251-24213661	3577
TCONS_00025862	Sense LncRNA	Chr01:24193251-24213661	1583
TCONS_00025873	Sense LncRNA	Chr01:24675040-24679978	582
TCONS_00025877	Sense LncRNA	Chr01:24791374-24792616	719
TCONS_00025878	Sense LncRNA	Chr01:24832529-24837689	742
TCONS_00025879	Sense LncRNA	Chr01:24832529-24837689	832
TCONS_00025888	Sense LncRNA	Chr01:24903187-24911540	1528
TCONS_00025907	Sense LncRNA	Chr01:26004454-26007677	804
TCONS_00025913	Sense LncRNA	Chr01:26293548-26299655	300
TCONS_00025939	Sense LncRNA	Chr01:27288711-27292883	427
TCONS_00025942	Sense LncRNA	Chr01:27537169-27544775	914
TCONS_00025958	Sense LncRNA	Chr01:28647637-28650954	687
TCONS_00025971	Sense LncRNA	Chr01:29102934-29132468	605
TCONS_00025983	Sense LncRNA	Chr01:29908154-29910853	841
TCONS_00025994	Sense LncRNA	Chr01:30966651-30969292	964
TCONS_00026020	Sense LncRNA	Chr01:32624821-32637219	1353
TCONS_00026060	Sense LncRNA	Chr01:35166650-35170370	452
TCONS_00026075	Sense LncRNA	Chr01:35980478-35987415	1723
TCONS_00026103	Sense LncRNA	Chr01:37943746-37947687	498
TCONS_00026112	Sense LncRNA	Chr01:39251147-39256404	1287
TCONS_00026119	Sense LncRNA	Chr01:39652240-39656179	430
TCONS_00026131	Sense LncRNA	Chr01:40349659-40354779	1062
TCONS_00026171	Sense LncRNA	Chr01:43351123-43354650	356
TCONS_00026184	Sense LncRNA	Chr01:44240507-44248271	1600
TCONS_00026215	Sense LncRNA	Chr01:46704736-46707732	506
TCONS_00026240	Sense LncRNA	Chr01:49081451-49084692	1003
TCONS_00026241	Sense LncRNA	Chr01:49098156-49102288	544
TCONS_00026242	Sense LncRNA	Chr01:49169517-49176510	3299
TCONS_00026244	Sense LncRNA	Chr01:49357106-49365845	1630
TCONS_00026248	Sense LncRNA	Chr01:49489404-49493056	1413
TCONS_00026254	Sense LncRNA	Chr01:49899077-49906033	596
TCONS_00026258	Sense LncRNA	Chr01:50012502-50016110	648
TCONS_00026277	Sense LncRNA	Chr01:50482973-50488524	754
TCONS_00026355	Sense LncRNA	Chr01:4817338-4819750	321
TCONS_00026552	Sense LncRNA	Chr01:15402618-15408995	358
TCONS_00026983	Sense LncRNA	Chr01:1239321-1241981	1031
TCONS_00027038	Sense LncRNA	Chr01:3896582-3902052	866
TCONS_00027044	Sense LncRNA	Chr01:4100759-4104819	602
TCONS_00027058	Sense LncRNA	Chr01:5304394-5307189	610
TCONS_00027066	Sense LncRNA	Chr01:5821586-5827533	1330
TCONS_00027068	Sense LncRNA	Chr01:5869106-5870548	702
TCONS_00027071	Sense LncRNA	Chr01:5944066-5945792	1055
TCONS_00027104	Sense LncRNA	Chr01:7146273-7151251	1757
TCONS_00027105	Sense LncRNA	Chr01:7146273-7151251	2308
TCONS_00027106	Sense LncRNA	Chr01:7146273-7151251	1525
TCONS_00027107	Sense LncRNA	Chr01:7146273-7151251	1575
TCONS_00027160	Sense LncRNA	Chr01:9750079-9753335	1449
TCONS_00027165	Sense LncRNA	Chr01:10035413-10054701	2127
TCONS_00027176	Sense LncRNA	Chr01:10770183-10773136	1370
TCONS_00027201	Sense LncRNA	Chr01:11519162-11522724	1142
TCONS_00027231	Sense LncRNA	Chr01:13230680-13238064	2245
TCONS_00027238	Sense LncRNA	Chr01:13984786-13988207	602
TCONS_00027258	Sense LncRNA	Chr01:15958669-15963352	1330
TCONS_00027327	Sense LncRNA	Chr01:23012081-23016333	272
TCONS_00027340	Sense LncRNA	Chr01:24193251-24213661	761
TCONS_00027405	Sense LncRNA	Chr01:29102934-29132468	667
TCONS_00027451	Sense LncRNA	Chr01:32044768-32052111	691
TCONS_00027478	Sense LncRNA	Chr01:32913991-32917240	1358
TCONS_00027518	Sense LncRNA	Chr01:35510386-35513749	279
TCONS_00027525	Sense LncRNA	Chr01:35980478-35987415	1961
TCONS_00027534	Sense LncRNA	Chr01:36331897-36334750	899
TCONS_00027540	Sense LncRNA	Chr01:37003219-37009609	2283
TCONS_00027551	Sense LncRNA	Chr01:37603349-37603811	431
TCONS_00027571	Sense LncRNA	Chr01:39251147-39256404	1143
TCONS_00027585	Sense LncRNA	Chr01:40001052-40198793	383
TCONS_00027599	Sense LncRNA	Chr01:42015546-42016590	777
TCONS_00027637	Sense LncRNA	Chr01:44366159-44374348	511
TCONS_00028081	Sense LncRNA	Chr01:38008847-38017794	490
TCONS_00028163	Sense LncRNA	Chr01:245612-248035	767
TCONS_00028217	Sense LncRNA	Chr01:3107922-3112388	636
TCONS_00028221	Sense LncRNA	Chr01:3427236-3472347	1097
TCONS_00028268	Sense LncRNA	Chr01:6864784-6871577	902
TCONS_00028360	Sense LncRNA	Chr01:13524987-13529480	356
TCONS_00028368	Sense LncRNA	Chr01:13935156-13940543	1782
TCONS_00028371	Sense LncRNA	Chr01:14143926-14145990	332
TCONS_00028376	Sense LncRNA	Chr01:14414206-14416283	1312
TCONS_00028383	Sense LncRNA	Chr01:15136471-15142696	1380
TCONS_00028392	Sense LncRNA	Chr01:15958669-15963352	1273
TCONS_00028417	Sense LncRNA	Chr01:20943899-20956738	674
TCONS_00028419	Sense LncRNA	Chr01:20943899-20956738	751
TCONS_00028450	Sense LncRNA	Chr01:25149722-25152389	993
TCONS_00028464	Sense LncRNA	Chr01:25927106-25932430	1674
TCONS_00028467	Sense LncRNA	Chr01:26307515-26324015	1044
TCONS_00028498	Sense LncRNA	Chr01:28939251-28985529	1284
TCONS_00028511	Sense LncRNA	Chr01:29619687-29707238	404
TCONS_00028520	Sense LncRNA	Chr01:30709419-30714718	1111
TCONS_00028553	Sense LncRNA	Chr01:35510386-35513749	710
TCONS_00028561	Sense LncRNA	Chr01:36381082-36386673	1404
TCONS_00028562	Sense LncRNA	Chr01:36381082-36386673	948
TCONS_00028571	Sense LncRNA	Chr01:37165730-37209102	240
TCONS_00028591	Sense LncRNA	Chr01:39920086-39941129	597
TCONS_00028596	Sense LncRNA	Chr01:40349659-40354779	1769
TCONS_00028597	Sense LncRNA	Chr01:40762279-40793645	697
TCONS_00028604	Sense LncRNA	Chr01:41257676-41261408	641
TCONS_00028626	Sense LncRNA	Chr01:43814207-43860066	463
TCONS_00028652	Sense LncRNA	Chr01:46780848-46783201	540
TCONS_00028671	Sense LncRNA	Chr01:49019143-49047179	701
TCONS_00029545	Sense LncRNA	Chr01:23793924-23833914	303
TCONS_00030544	Sense LncRNA	Chr01:308122-317967	1588
TCONS_00030562	Sense LncRNA	Chr01:672969-677163	1532
TCONS_00030662	Sense LncRNA	Chr01:2551629-2556611	676
TCONS_00030681	Sense LncRNA	Chr01:3107922-3112388	677
TCONS_00030698	Sense LncRNA	Chr01:3543334-3548006	407
TCONS_00030789	Sense LncRNA	Chr01:5749607-5754418	940
TCONS_00030932	Sense LncRNA	Chr01:8553908-8558642	216
TCONS_00030993	Sense LncRNA	Chr01:10035413-10054701	2348
TCONS_00031026	Sense LncRNA	Chr01:10542977-10547475	897
TCONS_00031070	Sense LncRNA	Chr01:11446090-11451199	1529
TCONS_00031071	Sense LncRNA	Chr01:11446090-11451199	570
TCONS_00031093	Sense LncRNA	Chr01:11866572-11876308	2078
TCONS_00031128	Sense LncRNA	Chr01:12557132-12563919	840
TCONS_00031142	Sense LncRNA	Chr01:12805781-12807714	948
TCONS_00031153	Sense LncRNA	Chr01:13297762-13304180	2396
TCONS_00031284	Sense LncRNA	Chr01:17058170-17064441	1192
TCONS_00031356	Sense LncRNA	Chr01:19466100-19471070	889
TCONS_00031377	Sense LncRNA	Chr01:20272033-20276455	212
TCONS_00031394	Sense LncRNA	Chr01:20662692-20669122	2174
TCONS_00031421	Sense LncRNA	Chr01:21159772-21169996	963
TCONS_00031453	Sense LncRNA	Chr01:21862538-21868921	1630
TCONS_00031511	Sense LncRNA	Chr01:23854166-23859135	2526
TCONS_00031540	Sense LncRNA	Chr01:24715176-24721238	461
TCONS_00031549	Sense LncRNA	Chr01:24838293-24842440	425
TCONS_00031598	Sense LncRNA	Chr01:26342500-26362609	303
TCONS_00031759	Sense LncRNA	Chr01:30434212-30439142	505
TCONS_00031898	Sense LncRNA	Chr01:34777769-34786142	909
TCONS_00031916	Sense LncRNA	Chr01:35096624-35102322	1132
TCONS_00031983	Sense LncRNA	Chr01:37165730-37209102	1500
TCONS_00032017	Sense LncRNA	Chr01:38179318-38187785	677
TCONS_00032020	Sense LncRNA	Chr01:38334237-38339873	1675
TCONS_00032029	Sense LncRNA	Chr01:38438396-38444987	556
TCONS_00032070	Sense LncRNA	Chr01:39652240-39656179	777
TCONS_00032084	Sense LncRNA	Chr01:39842459-39914184	1405
TCONS_00032401	Sense LncRNA	Chr01:48849969-48877379	879
TCONS_00032439	Sense LncRNA	Chr01:49489404-49493056	284
TCONS_00032977	Sense LncRNA	Chr01:4345053-4346452	582
TCONS_00032979	Sense LncRNA	Chr01:4493878-4500423	768
TCONS_00032986	Sense LncRNA	Chr01:5358560-5361624	1352
TCONS_00033011	Sense LncRNA	Chr01:8019040-8022047	1051
TCONS_00033059	Sense LncRNA	Chr01:11698167-11700586	301
TCONS_00033060	Sense LncRNA	Chr01:11698167-11700586	285
TCONS_00033085	Sense LncRNA	Chr01:14143926-14145990	735
TCONS_00033086	Sense LncRNA	Chr01:14143926-14145990	377
TCONS_00033087	Sense LncRNA	Chr01:14602634-14616134	1417
TCONS_00033088	Sense LncRNA	Chr01:14602634-14616134	1764
TCONS_00033105	Sense LncRNA	Chr01:17650393-17655906	1274
TCONS_00033133	Sense LncRNA	Chr01:24302673-24303609	487
TCONS_00033140	Sense LncRNA	Chr01:24818576-24821647	704
TCONS_00033144	Sense LncRNA	Chr01:25962699-25965644	1856
TCONS_00033172	Sense LncRNA	Chr01:28852327-28855596	784
TCONS_00033173	Sense LncRNA	Chr01:28852327-28855596	307
TCONS_00033253	Sense LncRNA	Chr01:38370297-38376251	1108
TCONS_00033255	Sense LncRNA	Chr01:38536520-38543257	604
TCONS_00033270	Sense LncRNA	Chr01:40762279-40793645	483
TCONS_00033281	Sense LncRNA	Chr01:41257676-41261408	812
TCONS_00033291	Sense LncRNA	Chr01:42608630-42616063	1643
TCONS_00033294	Sense LncRNA	Chr01:42966864-42999882	309
TCONS_00033315	Sense LncRNA	Chr01:46858616-46892442	471
TCONS_00033699	Sense LncRNA	Chr02:3529427-3530434	264
TCONS_00034431	Sense LncRNA	Chr02:10876938-10882973	355
TCONS_00034588	Sense LncRNA	Chr02:12398395-12413419	653
TCONS_00034660	Sense LncRNA	Chr02:12984992-13000384	620
TCONS_00034711	Sense LncRNA	Chr02:14239198-14242178	222
TCONS_00035361	Sense LncRNA	Chr02:9624-17751	645
TCONS_00035363	Sense LncRNA	Chr02:9624-17751	228
TCONS_00035375	Sense LncRNA	Chr02:100883-110053	1088
TCONS_00035453	Sense LncRNA	Chr02:875929-881224	778
TCONS_00035500	Sense LncRNA	Chr02:1381792-1383821	746
TCONS_00035502	Sense LncRNA	Chr02:1414599-1417469	1420
TCONS_00035507	Sense LncRNA	Chr02:1463694-1472599	960
TCONS_00035531	Sense LncRNA	Chr02:1604738-1714822	767
TCONS_00035545	Sense LncRNA	Chr02:1876775-1878553	704
TCONS_00035647	Sense LncRNA	Chr02:2826998-2829545	213
TCONS_00035664	Sense LncRNA	Chr02:2888661-2895040	201
TCONS_00035681	Sense LncRNA	Chr02:3024340-3030821	1085
TCONS_00035749	Sense LncRNA	Chr02:3705296-3709560	2146
TCONS_00035768	Sense LncRNA	Chr02:3815117-3817393	757
TCONS_00035769	Sense LncRNA	Chr02:3815117-3817393	754
TCONS_00035776	Sense LncRNA	Chr02:3909804-3911480	1595
TCONS_00035795	Sense LncRNA	Chr02:4191925-4192567	378
TCONS_00035857	Sense LncRNA	Chr02:4696820-4708167	3656
TCONS_00035878	Sense LncRNA	Chr02:4982811-4986221	663
TCONS_00035948	Sense LncRNA	Chr02:5691299-5696765	379
TCONS_00035989	Sense LncRNA	Chr02:6314501-6320709	2065
TCONS_00036009	Sense LncRNA	Chr02:6478393-6481661	1511
TCONS_00036010	Sense LncRNA	Chr02:6498790-6501225	1375
TCONS_00036098	Sense LncRNA	Chr02:7311381-7321254	749
TCONS_00036099	Sense LncRNA	Chr02:7311381-7321254	572
TCONS_00036110	Sense LncRNA	Chr02:7459435-7462483	694
TCONS_00036113	Sense LncRNA	Chr02:7462877-7465135	650
TCONS_00036146	Sense LncRNA	Chr02:7778871-7783224	794
TCONS_00036270	Sense LncRNA	Chr02:9083940-9101180	828
TCONS_00036271	Sense LncRNA	Chr02:9083940-9101180	885
TCONS_00036387	Sense LncRNA	Chr02:10113355-10116028	511
TCONS_00036501	Sense LncRNA	Chr02:11810280-11820159	1727
TCONS_00036549	Sense LncRNA	Chr02:12185243-12188038	1310
TCONS_00036587	Sense LncRNA	Chr02:12608581-12611087	769
TCONS_00036605	Sense LncRNA	Chr02:12883929-12888698	1547
TCONS_00036626	Sense LncRNA	Chr02:13194201-13197366	701
TCONS_00036638	Sense LncRNA	Chr02:13256987-13259322	378
TCONS_00036639	Sense LncRNA	Chr02:13256987-13259322	341
TCONS_00036716	Sense LncRNA	Chr02:14276397-14280535	627
TCONS_00036732	Sense LncRNA	Chr02:14363509-14370733	3292
TCONS_00036734	Sense LncRNA	Chr02:14363509-14370733	1743
TCONS_00036767	Sense LncRNA	Chr02:14827521-14831310	942
TCONS_00036782	Sense LncRNA	Chr02:15027168-15031999	1125
TCONS_00036797	Sense LncRNA	Chr02:15305899-15307210	814
TCONS_00036799	Sense LncRNA	Chr02:15305899-15307210	990
TCONS_00036820	Sense LncRNA	Chr02:15697109-15702971	2835
TCONS_00036833	Sense LncRNA	Chr02:15903067-15907258	875
TCONS_00036860	Sense LncRNA	Chr02:16852494-16860682	386
TCONS_00036866	Sense LncRNA	Chr02:16888795-16891205	273
TCONS_00036878	Sense LncRNA	Chr02:16948655-16953290	811
TCONS_00036923	Sense LncRNA	Chr02:19336482-19347279	1028
TCONS_00036956	Sense LncRNA	Chr02:19894831-19897478	595
TCONS_00036987	Sense LncRNA	Chr02:20887920-20892336	2930
TCONS_00037042	Sense LncRNA	Chr02:22444435-22453548	590
TCONS_00037073	Sense LncRNA	Chr02:22717162-22787324	450
TCONS_00037074	Sense LncRNA	Chr02:22717162-22787324	597
TCONS_00037075	Sense LncRNA	Chr02:22717162-22787324	458
TCONS_00037078	Sense LncRNA	Chr02:22805849-22808524	1372
TCONS_00037136	Sense LncRNA	Chr02:23347642-23352083	2029
TCONS_00037152	Sense LncRNA	Chr02:23552270-23589522	1244
TCONS_00037174	Sense LncRNA	Chr02:23728713-23732334	582
TCONS_00037204	Sense LncRNA	Chr02:23940898-23945837	722
TCONS_00037224	Sense LncRNA	Chr02:24187373-24192984	1634
TCONS_00037238	Sense LncRNA	Chr02:24379101-24386173	1118
TCONS_00037255	Sense LncRNA	Chr02:24564578-24570085	315
TCONS_00037277	Sense LncRNA	Chr02:24656475-24736635	300
TCONS_00037289	Sense LncRNA	Chr02:24656475-24736635	217
TCONS_00037296	Sense LncRNA	Chr02:24656475-24736635	334
TCONS_00038296	Sense LncRNA	Chr02:410276-412769	247
TCONS_00038318	Sense LncRNA	Chr02:875929-881224	802
TCONS_00038322	Sense LncRNA	Chr02:886567-894792	1105
TCONS_00038348	Sense LncRNA	Chr02:1566291-1567720	608
TCONS_00038356	Sense LncRNA	Chr02:1922786-1927377	1721
TCONS_00038389	Sense LncRNA	Chr02:2599699-2603555	736
TCONS_00038405	Sense LncRNA	Chr02:2888661-2895040	1504
TCONS_00038447	Sense LncRNA	Chr02:3838346-3843393	2142
TCONS_00038477	Sense LncRNA	Chr02:4549497-4558593	1535
TCONS_00038506	Sense LncRNA	Chr02:5426499-5433623	1463
TCONS_00038545	Sense LncRNA	Chr02:6452919-6458517	985
TCONS_00038606	Sense LncRNA	Chr02:7521720-7524769	541
TCONS_00038662	Sense LncRNA	Chr02:8752611-8756514	592
TCONS_00038667	Sense LncRNA	Chr02:8856101-8860128	858
TCONS_00038687	Sense LncRNA	Chr02:9444792-9446697	615
TCONS_00038693	Sense LncRNA	Chr02:9542825-9556432	615
TCONS_00038790	Sense LncRNA	Chr02:11918175-11920685	998
TCONS_00038798	Sense LncRNA	Chr02:12013198-12028010	564
TCONS_00038829	Sense LncRNA	Chr02:12690682-12695798	1690
TCONS_00038832	Sense LncRNA	Chr02:12778467-12781213	432
TCONS_00038834	Sense LncRNA	Chr02:12796999-12798182	302
TCONS_00038930	Sense LncRNA	Chr02:15349975-15353787	2525
TCONS_00038931	Sense LncRNA	Chr02:15349975-15353787	2991
TCONS_00038941	Sense LncRNA	Chr02:15747289-15749526	821
TCONS_00038942	Sense LncRNA	Chr02:15747289-15749526	564
TCONS_00038943	Sense LncRNA	Chr02:15747289-15749526	598
TCONS_00039098	Sense LncRNA	Chr02:23347642-23352083	1465
TCONS_00039116	Sense LncRNA	Chr02:23728713-23732334	577
TCONS_00039144	Sense LncRNA	Chr02:24450937-24455168	580
TCONS_00039163	Sense LncRNA	Chr02:24783670-24789319	1301
TCONS_00039839	Sense LncRNA	Chr02:484476-486348	997
TCONS_00039848	Sense LncRNA	Chr02:841764-846111	617
TCONS_00039906	Sense LncRNA	Chr02:2557454-2565047	3584
TCONS_00039959	Sense LncRNA	Chr02:3925125-3929902	1388
TCONS_00039969	Sense LncRNA	Chr02:4285571-4289866	616
TCONS_00040041	Sense LncRNA	Chr02:6471398-6477374	728
TCONS_00040042	Sense LncRNA	Chr02:6478393-6481661	999
TCONS_00040061	Sense LncRNA	Chr02:7028875-7031543	1444
TCONS_00040082	Sense LncRNA	Chr02:7637827-7643102	612
TCONS_00040092	Sense LncRNA	Chr02:8007595-8012159	791
TCONS_00040133	Sense LncRNA	Chr02:9628783-9636751	1640
TCONS_00040156	Sense LncRNA	Chr02:10123406-10125489	1245
TCONS_00040160	Sense LncRNA	Chr02:10354888-10361082	1982
TCONS_00040275	Sense LncRNA	Chr02:15858472-15865592	1306
TCONS_00040327	Sense LncRNA	Chr02:21894239-21895996	551
TCONS_00040336	Sense LncRNA	Chr02:22444435-22453548	712
TCONS_00040351	Sense LncRNA	Chr02:22717162-22787324	242
TCONS_00040383	Sense LncRNA	Chr02:23728713-23732334	716
TCONS_00040420	Sense LncRNA	Chr02:24592336-24602250	1400
TCONS_00041094	Sense LncRNA	Chr02:100883-110053	1805
TCONS_00041114	Sense LncRNA	Chr02:642312-645228	986
TCONS_00041116	Sense LncRNA	Chr02:725180-726752	845
TCONS_00041144	Sense LncRNA	Chr02:1579110-1583940	1835
TCONS_00041147	Sense LncRNA	Chr02:1604738-1714822	1416
TCONS_00041178	Sense LncRNA	Chr02:2557454-2565047	3634
TCONS_00041193	Sense LncRNA	Chr02:2879010-2885738	1333
TCONS_00041195	Sense LncRNA	Chr02:2947372-2951365	849
TCONS_00041219	Sense LncRNA	Chr02:3909804-3911480	966
TCONS_00041247	Sense LncRNA	Chr02:5070973-5073900	1093
TCONS_00041260	Sense LncRNA	Chr02:5426499-5433623	1063
TCONS_00041262	Sense LncRNA	Chr02:5505013-5551541	386
TCONS_00041314	Sense LncRNA	Chr02:7271488-7277067	1292
TCONS_00041411	Sense LncRNA	Chr02:10038437-10045484	1879
TCONS_00041435	Sense LncRNA	Chr02:11144725-11146643	687
TCONS_00041439	Sense LncRNA	Chr02:11437037-11446597	752
TCONS_00041443	Sense LncRNA	Chr02:11511535-11514641	1272
TCONS_00041445	Sense LncRNA	Chr02:11519108-11523680	813
TCONS_00041470	Sense LncRNA	Chr02:12291503-12293698	1240
TCONS_00041478	Sense LncRNA	Chr02:12814278-12818327	394
TCONS_00041508	Sense LncRNA	Chr02:13746582-13754767	2128
TCONS_00041521	Sense LncRNA	Chr02:14276397-14280535	1924
TCONS_00041538	Sense LncRNA	Chr02:14805884-14806379	295
TCONS_00041541	Sense LncRNA	Chr02:14936875-14939215	366
TCONS_00041545	Sense LncRNA	Chr02:15045900-15048820	703
TCONS_00041573	Sense LncRNA	Chr02:16897581-16910287	241
TCONS_00041575	Sense LncRNA	Chr02:16897581-16910287	2419
TCONS_00041610	Sense LncRNA	Chr02:20796601-20805889	243
TCONS_00041629	Sense LncRNA	Chr02:22717162-22787324	746
TCONS_00041674	Sense LncRNA	Chr02:24379101-24386173	1097
TCONS_00041683	Sense LncRNA	Chr02:24656475-24736635	230
TCONS_00042286	Sense LncRNA	Chr02:417365-471485	507
TCONS_00042345	Sense LncRNA	Chr02:2308236-2315155	1831
TCONS_00042407	Sense LncRNA	Chr02:4186865-4191789	794
TCONS_00042449	Sense LncRNA	Chr02:5668235-5671633	468
TCONS_00042483	Sense LncRNA	Chr02:6682249-6687359	1211
TCONS_00042501	Sense LncRNA	Chr02:7208401-7211651	1191
TCONS_00042503	Sense LncRNA	Chr02:7521720-7524769	565
TCONS_00042505	Sense LncRNA	Chr02:7713563-7724136	1111
TCONS_00042514	Sense LncRNA	Chr02:7861383-7880684	1499
TCONS_00042562	Sense LncRNA	Chr02:9628783-9636751	1288
TCONS_00042610	Sense LncRNA	Chr02:11600262-11604724	569
TCONS_00042620	Sense LncRNA	Chr02:11858459-11863224	337
TCONS_00042683	Sense LncRNA	Chr02:14357258-14359584	810
TCONS_00042690	Sense LncRNA	Chr02:14827521-14831310	1000
TCONS_00042751	Sense LncRNA	Chr02:21948772-21956123	923
TCONS_00042770	Sense LncRNA	Chr02:22717162-22787324	471
TCONS_00042801	Sense LncRNA	Chr02:23552270-23589522	1763
TCONS_00043621	Sense LncRNA	Chr02:23754018-23757970	292
TCONS_00043726	Sense LncRNA	Chr02:1463694-1472599	876
TCONS_00043728	Sense LncRNA	Chr02:1463694-1472599	1400
TCONS_00043745	Sense LncRNA	Chr02:1979279-1981572	883
TCONS_00043783	Sense LncRNA	Chr02:2870010-2872539	750
TCONS_00043807	Sense LncRNA	Chr02:3210834-3217332	1170
TCONS_00043817	Sense LncRNA	Chr02:3578196-3584254	1922
TCONS_00043829	Sense LncRNA	Chr02:3712860-3716155	1155
TCONS_00043830	Sense LncRNA	Chr02:3712860-3716155	950
TCONS_00043864	Sense LncRNA	Chr02:4537028-4541353	399
TCONS_00043891	Sense LncRNA	Chr02:5242552-5267545	663
TCONS_00043915	Sense LncRNA	Chr02:5668235-5671633	543
TCONS_00043916	Sense LncRNA	Chr02:5668235-5671633	206
TCONS_00043921	Sense LncRNA	Chr02:5772388-5777796	917
TCONS_00043930	Sense LncRNA	Chr02:5896820-5915458	854
TCONS_00043933	Sense LncRNA	Chr02:6072966-6073928	390
TCONS_00044074	Sense LncRNA	Chr02:9422291-9426509	1489
TCONS_00044103	Sense LncRNA	Chr02:9824519-9828455	712
TCONS_00044126	Sense LncRNA	Chr02:10178225-10182345	457
TCONS_00044168	Sense LncRNA	Chr02:11718358-11719862	1043
TCONS_00044174	Sense LncRNA	Chr02:11810280-11820159	1255
TCONS_00044200	Sense LncRNA	Chr02:12299672-12302810	267
TCONS_00044227	Sense LncRNA	Chr02:13598029-13606631	543
TCONS_00044257	Sense LncRNA	Chr02:14245897-14265949	601
TCONS_00044276	Sense LncRNA	Chr02:14363509-14370733	1915
TCONS_00044311	Sense LncRNA	Chr02:15697109-15702971	2960
TCONS_00044326	Sense LncRNA	Chr02:19138678-19143259	234
TCONS_00044357	Sense LncRNA	Chr02:20407270-20419311	857
TCONS_00044365	Sense LncRNA	Chr02:20862231-20864973	601
TCONS_00044385	Sense LncRNA	Chr02:22230554-22247124	863
TCONS_00044403	Sense LncRNA	Chr02:22717162-22787324	986
TCONS_00045037	Sense LncRNA	Chr02:4537028-4541353	741
TCONS_00045086	Sense LncRNA	Chr02:6615063-6628939	3230
TCONS_00045100	Sense LncRNA	Chr02:7050490-7057288	1395
TCONS_00045111	Sense LncRNA	Chr02:7713563-7724136	1107
TCONS_00045150	Sense LncRNA	Chr02:9628783-9636751	1334
TCONS_00045230	Sense LncRNA	Chr02:13368890-13371707	1164
TCONS_00045243	Sense LncRNA	Chr02:14319322-14339266	1441
TCONS_00045245	Sense LncRNA	Chr02:14363509-14370733	619
TCONS_00045271	Sense LncRNA	Chr02:15630030-15631931	1058
TCONS_00045326	Sense LncRNA	Chr02:22717162-22787324	687
TCONS_00045358	Sense LncRNA	Chr02:24281523-24287347	1520
TCONS_00045696	Sense LncRNA	Chr02:9888380-9894037	879
TCONS_00046052	Sense LncRNA	Chr02:858183-859416	1063
TCONS_00046127	Sense LncRNA	Chr02:2353745-2365061	1478
TCONS_00046134	Sense LncRNA	Chr02:2557454-2565047	3837
TCONS_00046145	Sense LncRNA	Chr02:2947372-2951365	1752
TCONS_00046164	Sense LncRNA	Chr02:3578196-3584254	2021
TCONS_00046165	Sense LncRNA	Chr02:3578196-3584254	915
TCONS_00046250	Sense LncRNA	Chr02:5691299-5696765	1951
TCONS_00046267	Sense LncRNA	Chr02:6314501-6320709	1611
TCONS_00046284	Sense LncRNA	Chr02:6615063-6628939	2147
TCONS_00046302	Sense LncRNA	Chr02:7050490-7057288	2627
TCONS_00046306	Sense LncRNA	Chr02:7208401-7211651	1148
TCONS_00046325	Sense LncRNA	Chr02:7713563-7724136	1659
TCONS_00046360	Sense LncRNA	Chr02:8863886-8867831	2584
TCONS_00046393	Sense LncRNA	Chr02:9851029-9862558	3619
TCONS_00046403	Sense LncRNA	Chr02:10011038-10015442	3427
TCONS_00046417	Sense LncRNA	Chr02:10178225-10182345	905
TCONS_00046455	Sense LncRNA	Chr02:11556509-11560215	1078
TCONS_00046460	Sense LncRNA	Chr02:11810280-11820159	505
TCONS_00046463	Sense LncRNA	Chr02:11858459-11863224	1312
TCONS_00046464	Sense LncRNA	Chr02:11895086-11900008	1492
TCONS_00046538	Sense LncRNA	Chr02:14363509-14370733	2532
TCONS_00046562	Sense LncRNA	Chr02:15000735-15005395	1644
TCONS_00046586	Sense LncRNA	Chr02:16948655-16953290	1334
TCONS_00046632	Sense LncRNA	Chr02:21167648-21172604	833
TCONS_00046704	Sense LncRNA	Chr02:23946926-23951392	461
TCONS_00046739	Sense LncRNA	Chr02:24964374-24966650	2028
TCONS_00046743	Sense LncRNA	Chr02:25091682-25103791	1394
TCONS_00046964	Sense LncRNA	Chr02:8693523-8696141	823
TCONS_00047313	Sense LncRNA	Chr02:2790993-2793679	387
TCONS_00047350	Sense LncRNA	Chr02:4696820-4708167	2725
TCONS_00047387	Sense LncRNA	Chr02:5896820-5915458	4740
TCONS_00047411	Sense LncRNA	Chr02:7050490-7057288	1820
TCONS_00047457	Sense LncRNA	Chr02:9083940-9101180	992
TCONS_00047522	Sense LncRNA	Chr02:11437037-11446597	1236
TCONS_00047538	Sense LncRNA	Chr02:11858459-11863224	854
TCONS_00047553	Sense LncRNA	Chr02:12318155-12323116	1116
TCONS_00047561	Sense LncRNA	Chr02:12477900-12487322	696
TCONS_00047562	Sense LncRNA	Chr02:12477900-12487322	691
TCONS_00047617	Sense LncRNA	Chr02:15492660-15494564	971
TCONS_00047622	Sense LncRNA	Chr02:15858472-15865592	731
TCONS_00047715	Sense LncRNA	Chr02:24187373-24192984	1719
TCONS_00047840	Sense LncRNA	Chr02:4336683-4348618	395
TCONS_00047865	Sense LncRNA	Chr02:5213541-5219500	569
TCONS_00048180	Sense LncRNA	Chr02:1463694-1472599	870
TCONS_00048186	Sense LncRNA	Chr02:2308236-2315155	1374
TCONS_00048187	Sense LncRNA	Chr02:2308236-2315155	1243
TCONS_00048208	Sense LncRNA	Chr02:3474740-3479946	1038
TCONS_00048215	Sense LncRNA	Chr02:3705296-3709560	2005
TCONS_00048256	Sense LncRNA	Chr02:6277037-6281180	668
TCONS_00048257	Sense LncRNA	Chr02:6314501-6320709	2462
TCONS_00048258	Sense LncRNA	Chr02:6314501-6320709	1541
TCONS_00048261	Sense LncRNA	Chr02:6385302-6389593	1021
TCONS_00048262	Sense LncRNA	Chr02:6385302-6389593	523
TCONS_00048271	Sense LncRNA	Chr02:6682249-6687359	454
TCONS_00048277	Sense LncRNA	Chr02:6887788-6891022	1057
TCONS_00048322	Sense LncRNA	Chr02:8823837-8828023	436
TCONS_00048360	Sense LncRNA	Chr02:11437037-11446597	328
TCONS_00048365	Sense LncRNA	Chr02:11519108-11523680	1059
TCONS_00048386	Sense LncRNA	Chr02:12690682-12695798	836
TCONS_00048391	Sense LncRNA	Chr02:13670811-13674146	982
TCONS_00048404	Sense LncRNA	Chr02:14276397-14280535	1764
TCONS_00048407	Sense LncRNA	Chr02:14363509-14370733	982
TCONS_00048413	Sense LncRNA	Chr02:15045900-15048820	814
TCONS_00048431	Sense LncRNA	Chr02:17495155-17499193	1341
TCONS_00048457	Sense LncRNA	Chr02:22230554-22247124	1403
TCONS_00048506	Sense LncRNA	Chr02:24946750-24953398	896
TCONS_00048724	Sense LncRNA	Chr02:9463836-9467868	238
TCONS_00048999	Sense LncRNA	Chr02:417365-471485	3276
TCONS_00049005	Sense LncRNA	Chr02:771899-779688	525
TCONS_00049008	Sense LncRNA	Chr02:812203-816802	1969
TCONS_00049010	Sense LncRNA	Chr02:841764-846111	1358
TCONS_00049019	Sense LncRNA	Chr02:1082754-1083883	525
TCONS_00049032	Sense LncRNA	Chr02:1463694-1472599	978
TCONS_00049033	Sense LncRNA	Chr02:1463694-1472599	607
TCONS_00049034	Sense LncRNA	Chr02:1566291-1567720	742
TCONS_00049061	Sense LncRNA	Chr02:2353745-2365061	456
TCONS_00049124	Sense LncRNA	Chr02:4186865-4191789	1295
TCONS_00049143	Sense LncRNA	Chr02:4606487-4613564	646
TCONS_00049144	Sense LncRNA	Chr02:4606487-4613564	399
TCONS_00049148	Sense LncRNA	Chr02:4709214-4713956	1188
TCONS_00049157	Sense LncRNA	Chr02:5242552-5267545	420
TCONS_00049158	Sense LncRNA	Chr02:5242552-5267545	420
TCONS_00049182	Sense LncRNA	Chr02:5691299-5696765	738
TCONS_00049191	Sense LncRNA	Chr02:6314501-6320709	2620
TCONS_00049193	Sense LncRNA	Chr02:6385302-6389593	871
TCONS_00049204	Sense LncRNA	Chr02:6765587-6770024	644
TCONS_00049207	Sense LncRNA	Chr02:7187692-7190779	1575
TCONS_00049247	Sense LncRNA	Chr02:8823837-8828023	713
TCONS_00049257	Sense LncRNA	Chr02:9083940-9101180	996
TCONS_00049260	Sense LncRNA	Chr02:9422291-9426509	2279
TCONS_00049268	Sense LncRNA	Chr02:9628783-9636751	1053
TCONS_00049295	Sense LncRNA	Chr02:10141710-10144336	557
TCONS_00049303	Sense LncRNA	Chr02:10327966-10333273	396
TCONS_00049308	Sense LncRNA	Chr02:10452536-10456553	704
TCONS_00049319	Sense LncRNA	Chr02:10640583-10643250	807
TCONS_00049336	Sense LncRNA	Chr02:11753758-11787342	978
TCONS_00049339	Sense LncRNA	Chr02:11810280-11820159	1455
TCONS_00049377	Sense LncRNA	Chr02:13670811-13674146	1867
TCONS_00049379	Sense LncRNA	Chr02:13811299-13813844	1294
TCONS_00049401	Sense LncRNA	Chr02:14803243-14805723	302
TCONS_00049403	Sense LncRNA	Chr02:14959544-14970456	2021
TCONS_00049425	Sense LncRNA	Chr02:16643000-16647153	245
TCONS_00049445	Sense LncRNA	Chr02:19822307-19825557	418
TCONS_00049457	Sense LncRNA	Chr02:21361634-21381196	848
TCONS_00049488	Sense LncRNA	Chr02:23059687-23068148	689
TCONS_00049496	Sense LncRNA	Chr02:23511855-23518198	1268
TCONS_00049499	Sense LncRNA	Chr02:23552270-23589522	1367
TCONS_00049514	Sense LncRNA	Chr02:24187373-24192984	1467
TCONS_00049520	Sense LncRNA	Chr02:24575583-24578881	725
TCONS_00049573	Sense LncRNA	Chr02:1246848-1250811	492
TCONS_00049999	Sense LncRNA	Chr02:725180-726752	672
TCONS_00050003	Sense LncRNA	Chr02:886567-894792	1386
TCONS_00050007	Sense LncRNA	Chr02:978912-983016	282
TCONS_00050039	Sense LncRNA	Chr02:2145216-2146256	207
TCONS_00050105	Sense LncRNA	Chr02:4473292-4479979	828
TCONS_00050111	Sense LncRNA	Chr02:4606487-4613564	673
TCONS_00050114	Sense LncRNA	Chr02:4709214-4713956	539
TCONS_00050117	Sense LncRNA	Chr02:4709214-4713956	476
TCONS_00050156	Sense LncRNA	Chr02:6385302-6389593	907
TCONS_00050159	Sense LncRNA	Chr02:6615063-6628939	2174
TCONS_00050169	Sense LncRNA	Chr02:7329916-7331754	580
TCONS_00050182	Sense LncRNA	Chr02:8007595-8012159	1246
TCONS_00050262	Sense LncRNA	Chr02:11519108-11523680	1374
TCONS_00050266	Sense LncRNA	Chr02:11753758-11787342	900
TCONS_00050283	Sense LncRNA	Chr02:12281385-12288757	367
TCONS_00050288	Sense LncRNA	Chr02:12778467-12781213	701
TCONS_00050302	Sense LncRNA	Chr02:13746582-13754767	2296
TCONS_00050313	Sense LncRNA	Chr02:14245897-14265949	532
TCONS_00050315	Sense LncRNA	Chr02:14276397-14280535	938
TCONS_00050329	Sense LncRNA	Chr02:15027168-15031999	860
TCONS_00050333	Sense LncRNA	Chr02:15349975-15353787	2440
TCONS_00050367	Sense LncRNA	Chr02:20862231-20864973	804
TCONS_00050372	Sense LncRNA	Chr02:21361634-21381196	598
TCONS_00050387	Sense LncRNA	Chr02:22717162-22787324	554
TCONS_00050397	Sense LncRNA	Chr02:23059687-23068148	1549
TCONS_00050416	Sense LncRNA	Chr02:23864508-23869365	1066
TCONS_00050431	Sense LncRNA	Chr02:24553607-24557865	1072
TCONS_00050432	Sense LncRNA	Chr02:24575583-24578881	588
TCONS_00050442	Sense LncRNA	Chr02:25091682-25103791	436
TCONS_00050505	Sense LncRNA	Chr02:3937143-3945198	470
TCONS_00050651	Sense LncRNA	Chr02:15041746-15045072	364
TCONS_00050751	Sense LncRNA	Chr02:484476-486348	1134
TCONS_00050774	Sense LncRNA	Chr02:1463694-1472599	2591
TCONS_00050786	Sense LncRNA	Chr02:2599699-2603555	409
TCONS_00050797	Sense LncRNA	Chr02:3115869-3120592	1267
TCONS_00050808	Sense LncRNA	Chr02:3705296-3709560	665
TCONS_00050813	Sense LncRNA	Chr02:3712860-3716155	1387
TCONS_00050821	Sense LncRNA	Chr02:4186865-4191789	509
TCONS_00050839	Sense LncRNA	Chr02:5242552-5267545	355
TCONS_00050840	Sense LncRNA	Chr02:5242552-5267545	360
TCONS_00050843	Sense LncRNA	Chr02:5333709-5337591	443
TCONS_00050848	Sense LncRNA	Chr02:5505013-5551541	488
TCONS_00050866	Sense LncRNA	Chr02:7050490-7057288	2760
TCONS_00050876	Sense LncRNA	Chr02:7713563-7724136	812
TCONS_00050882	Sense LncRNA	Chr02:8007595-8012159	1236
TCONS_00050911	Sense LncRNA	Chr02:9628783-9636751	1233
TCONS_00050926	Sense LncRNA	Chr02:10603291-10607859	1014
TCONS_00050934	Sense LncRNA	Chr02:11465717-11473350	1447
TCONS_00050938	Sense LncRNA	Chr02:11828357-11833729	1380
TCONS_00050943	Sense LncRNA	Chr02:12101665-12106353	874
TCONS_00050945	Sense LncRNA	Chr02:12185243-12188038	1020
TCONS_00050950	Sense LncRNA	Chr02:12477900-12487322	808
TCONS_00050964	Sense LncRNA	Chr02:14121478-14127562	1753
TCONS_00050967	Sense LncRNA	Chr02:14121478-14127562	766
TCONS_00050977	Sense LncRNA	Chr02:14357258-14359584	343
TCONS_00050978	Sense LncRNA	Chr02:14363509-14370733	2721
TCONS_00050994	Sense LncRNA	Chr02:16897581-16910287	1787
TCONS_00050999	Sense LncRNA	Chr02:19170733-19182188	1353
TCONS_00051023	Sense LncRNA	Chr02:23047949-23056170	611
TCONS_00051029	Sense LncRNA	Chr02:23511855-23518198	530
TCONS_00051798	Sense LncRNA	Chr02:21332630-21345285	280
TCONS_00051908	Sense LncRNA	Chr02:23825784-23833491	816
TCONS_00051983	Sense LncRNA	Chr02:311266-313157	826
TCONS_00051996	Sense LncRNA	Chr02:417365-471485	3543
TCONS_00052000	Sense LncRNA	Chr02:642312-645228	665
TCONS_00052054	Sense LncRNA	Chr02:2114743-2119132	917
TCONS_00052108	Sense LncRNA	Chr02:2947372-2951365	2969
TCONS_00052133	Sense LncRNA	Chr02:3474740-3479946	1335
TCONS_00052191	Sense LncRNA	Chr02:4640365-4643635	1162
TCONS_00052251	Sense LncRNA	Chr02:5691299-5696765	1345
TCONS_00052272	Sense LncRNA	Chr02:6340093-6342713	588
TCONS_00052280	Sense LncRNA	Chr02:6471398-6477374	959
TCONS_00052391	Sense LncRNA	Chr02:8997605-9006845	2951
TCONS_00052444	Sense LncRNA	Chr02:9923167-9930741	828
TCONS_00052525	Sense LncRNA	Chr02:11419165-11429199	694
TCONS_00052556	Sense LncRNA	Chr02:12113583-12116742	1630
TCONS_00052561	Sense LncRNA	Chr02:12265546-12270369	773
TCONS_00052681	Sense LncRNA	Chr02:15697109-15702971	2462
TCONS_00052744	Sense LncRNA	Chr02:19170733-19182188	1500
TCONS_00052766	Sense LncRNA	Chr02:19822307-19825557	459
TCONS_00052820	Sense LncRNA	Chr02:22275531-22283120	1475
TCONS_00052862	Sense LncRNA	Chr02:23511855-23518198	749
TCONS_00052898	Sense LncRNA	Chr02:24187373-24192984	748
TCONS_00052914	Sense LncRNA	Chr02:24450937-24455168	2619
TCONS_00052931	Sense LncRNA	Chr02:24778959-24781820	961
TCONS_00052937	Sense LncRNA	Chr02:24946750-24953398	496
TCONS_00052940	Sense LncRNA	Chr02:24964374-24966650	1010
TCONS_00053129	Sense LncRNA	Chr02:14228426-14230620	305
TCONS_00053215	Sense LncRNA	Chr02:100883-110053	3484
TCONS_00053222	Sense LncRNA	Chr02:489919-491577	370
TCONS_00053243	Sense LncRNA	Chr02:1604738-1714822	1646
TCONS_00053248	Sense LncRNA	Chr02:2517887-2519133	906
TCONS_00053260	Sense LncRNA	Chr02:3139074-3142048	2003
TCONS_00053282	Sense LncRNA	Chr02:5242552-5267545	1154
TCONS_00053302	Sense LncRNA	Chr02:5936490-5944314	395
TCONS_00053309	Sense LncRNA	Chr02:6692394-6700953	3285
TCONS_00053318	Sense LncRNA	Chr02:7713563-7724136	608
TCONS_00053328	Sense LncRNA	Chr02:8612786-8616624	944
TCONS_00053335	Sense LncRNA	Chr02:9083940-9101180	542
TCONS_00053353	Sense LncRNA	Chr02:10038437-10045484	1931
TCONS_00053366	Sense LncRNA	Chr02:11419165-11429199	290
TCONS_00053370	Sense LncRNA	Chr02:11753758-11787342	278
TCONS_00053421	Sense LncRNA	Chr02:19170733-19182188	1452
TCONS_00053430	Sense LncRNA	Chr02:20426272-20431583	834
TCONS_00053444	Sense LncRNA	Chr02:22717162-22787324	722
TCONS_00053672	Sense LncRNA	Chr03:3411293-3420923	512
TCONS_00053787	Sense LncRNA	Chr03:5053741-5059162	404
TCONS_00055164	Sense LncRNA	Chr03:465875-473490	429
TCONS_00055180	Sense LncRNA	Chr03:788904-791097	378
TCONS_00055185	Sense LncRNA	Chr03:1447901-1459403	327
TCONS_00055214	Sense LncRNA	Chr03:1854479-1890804	308
TCONS_00055239	Sense LncRNA	Chr03:2098691-2102284	697
TCONS_00055244	Sense LncRNA	Chr03:2153474-2154737	1003
TCONS_00055274	Sense LncRNA	Chr03:2352842-2356027	582
TCONS_00055294	Sense LncRNA	Chr03:2775842-2792753	584
TCONS_00055330	Sense LncRNA	Chr03:3804392-3809973	627
TCONS_00055389	Sense LncRNA	Chr03:5198261-5204591	2965
TCONS_00055434	Sense LncRNA	Chr03:7029839-7033161	1420
TCONS_00055468	Sense LncRNA	Chr03:7683479-7685115	1411
TCONS_00055541	Sense LncRNA	Chr03:9224943-9230127	1434
TCONS_00055546	Sense LncRNA	Chr03:9238750-9247250	1481
TCONS_00055578	Sense LncRNA	Chr03:9754370-9790950	649
TCONS_00055604	Sense LncRNA	Chr03:9946118-9955944	2042
TCONS_00055639	Sense LncRNA	Chr03:10295814-10300568	2104
TCONS_00055688	Sense LncRNA	Chr03:10749253-10751937	1594
TCONS_00055701	Sense LncRNA	Chr03:10935560-10945841	836
TCONS_00055804	Sense LncRNA	Chr03:12201992-12206808	1720
TCONS_00055918	Sense LncRNA	Chr03:13267438-13271408	405
TCONS_00055996	Sense LncRNA	Chr03:14261156-14261485	205
TCONS_00056000	Sense LncRNA	Chr03:14265267-14285720	1348
TCONS_00056006	Sense LncRNA	Chr03:14330718-14336211	1659
TCONS_00056014	Sense LncRNA	Chr03:14416843-14419424	1008
TCONS_00056064	Sense LncRNA	Chr03:14934670-14943262	1793
TCONS_00056088	Sense LncRNA	Chr03:15129389-15133828	1249
TCONS_00056125	Sense LncRNA	Chr03:15430451-15433220	207
TCONS_00056136	Sense LncRNA	Chr03:15654964-15658829	1513
TCONS_00056140	Sense LncRNA	Chr03:15687430-15689990	1032
TCONS_00056175	Sense LncRNA	Chr03:16335866-16338235	620
TCONS_00056205	Sense LncRNA	Chr03:16586185-16612110	507
TCONS_00056231	Sense LncRNA	Chr03:16807046-16815305	582
TCONS_00056252	Sense LncRNA	Chr03:17041300-17049026	1481
TCONS_00056258	Sense LncRNA	Chr03:17075347-17092144	312
TCONS_00056259	Sense LncRNA	Chr03:17075347-17092144	498
TCONS_00056371	Sense LncRNA	Chr03:18175833-18179145	399
TCONS_00056398	Sense LncRNA	Chr03:18615403-18619353	1547
TCONS_00056403	Sense LncRNA	Chr03:18732229-18738302	1099
TCONS_00056420	Sense LncRNA	Chr03:18976550-18982970	1259
TCONS_00056435	Sense LncRNA	Chr03:19111313-19187481	1863
TCONS_00056458	Sense LncRNA	Chr03:19588959-19592558	2408
TCONS_00056460	Sense LncRNA	Chr03:19611337-19614183	772
TCONS_00056520	Sense LncRNA	Chr03:20140670-20302270	833
TCONS_00056527	Sense LncRNA	Chr03:20140670-20302270	327
TCONS_00056530	Sense LncRNA	Chr03:20140670-20302270	711
TCONS_00056539	Sense LncRNA	Chr03:20357742-20359789	584
TCONS_00056540	Sense LncRNA	Chr03:20357742-20359789	263
TCONS_00056658	Sense LncRNA	Chr03:21731127-21742223	344
TCONS_00056764	Sense LncRNA	Chr03:3822304-3839786	233
TCONS_00057415	Sense LncRNA	Chr03:174887-184900	1233
TCONS_00057450	Sense LncRNA	Chr03:1925736-1934372	2109
TCONS_00057543	Sense LncRNA	Chr03:5231243-5231525	204
TCONS_00057573	Sense LncRNA	Chr03:7543009-7546614	1491
TCONS_00057592	Sense LncRNA	Chr03:8367213-8373658	349
TCONS_00057623	Sense LncRNA	Chr03:9622742-9628862	2452
TCONS_00057626	Sense LncRNA	Chr03:9754370-9790950	558
TCONS_00057636	Sense LncRNA	Chr03:9886940-9891240	1563
TCONS_00057639	Sense LncRNA	Chr03:9946118-9955944	1098
TCONS_00057642	Sense LncRNA	Chr03:9946118-9955944	1646
TCONS_00057682	Sense LncRNA	Chr03:10767397-10775130	3073
TCONS_00057814	Sense LncRNA	Chr03:14265267-14285720	1441
TCONS_00057817	Sense LncRNA	Chr03:14330718-14336211	1245
TCONS_00057873	Sense LncRNA	Chr03:15988671-15993680	852
TCONS_00057896	Sense LncRNA	Chr03:16780852-16784724	507
TCONS_00057943	Sense LncRNA	Chr03:17841646-17846030	433
TCONS_00057985	Sense LncRNA	Chr03:19111313-19187481	268
TCONS_00058014	Sense LncRNA	Chr03:19918000-19921782	770
TCONS_00058629	Sense LncRNA	Chr03:203366-213026	1185
TCONS_00058654	Sense LncRNA	Chr03:2263609-2269851	276
TCONS_00058683	Sense LncRNA	Chr03:4473174-4476818	962
TCONS_00058751	Sense LncRNA	Chr03:9946118-9955944	272
TCONS_00058758	Sense LncRNA	Chr03:9946118-9955944	1005
TCONS_00058777	Sense LncRNA	Chr03:10604515-10617521	971
TCONS_00058785	Sense LncRNA	Chr03:10654558-10660678	570
TCONS_00058833	Sense LncRNA	Chr03:12415107-12422457	711
TCONS_00058834	Sense LncRNA	Chr03:12484296-12489440	1348
TCONS_00058895	Sense LncRNA	Chr03:14218301-14220168	993
TCONS_00058899	Sense LncRNA	Chr03:14305476-14312983	359
TCONS_00058903	Sense LncRNA	Chr03:14432385-14436402	565
TCONS_00059047	Sense LncRNA	Chr03:19759456-19769680	981
TCONS_00059048	Sense LncRNA	Chr03:19759456-19769680	2062
TCONS_00059049	Sense LncRNA	Chr03:19759456-19769680	1183
TCONS_00059073	Sense LncRNA	Chr03:20357742-20359789	517
TCONS_00059079	Sense LncRNA	Chr03:20510976-20516065	1624
TCONS_00059103	Sense LncRNA	Chr03:21447209-21452033	1248
TCONS_00059735	Sense LncRNA	Chr03:2275731-2300097	367
TCONS_00059736	Sense LncRNA	Chr03:2275731-2300097	1974
TCONS_00059737	Sense LncRNA	Chr03:2275731-2300097	2812
TCONS_00059817	Sense LncRNA	Chr03:7543009-7546614	1323
TCONS_00059876	Sense LncRNA	Chr03:10295814-10300568	1626
TCONS_00059881	Sense LncRNA	Chr03:10537929-10541896	1122
TCONS_00059907	Sense LncRNA	Chr03:11145070-11147889	796
TCONS_00059927	Sense LncRNA	Chr03:12201992-12206808	438
TCONS_00059933	Sense LncRNA	Chr03:12562816-12568867	833
TCONS_00059951	Sense LncRNA	Chr03:13008383-13014027	250
TCONS_00059952	Sense LncRNA	Chr03:13040852-13046506	526
TCONS_00059973	Sense LncRNA	Chr03:13355952-13364490	624
TCONS_00060044	Sense LncRNA	Chr03:16396060-16398750	1225
TCONS_00060099	Sense LncRNA	Chr03:18175833-18179145	961
TCONS_00060101	Sense LncRNA	Chr03:18212976-18219770	2013
TCONS_00060107	Sense LncRNA	Chr03:18335029-18336959	1072
TCONS_00060127	Sense LncRNA	Chr03:19111313-19187481	298
TCONS_00060176	Sense LncRNA	Chr03:20627342-20632142	1798
TCONS_00060189	Sense LncRNA	Chr03:21312330-21317401	473
TCONS_00060202	Sense LncRNA	Chr03:21662126-21664687	1482
TCONS_00060727	Sense LncRNA	Chr03:1976840-1982336	1011
TCONS_00060730	Sense LncRNA	Chr03:2275731-2300097	1003
TCONS_00060750	Sense LncRNA	Chr03:2889038-2973203	274
TCONS_00060780	Sense LncRNA	Chr03:5287035-5288523	418
TCONS_00060822	Sense LncRNA	Chr03:9238750-9247250	249
TCONS_00060828	Sense LncRNA	Chr03:9622742-9628862	2987
TCONS_00060851	Sense LncRNA	Chr03:10295814-10300568	433
TCONS_00060855	Sense LncRNA	Chr03:10497269-10505660	1354
TCONS_00060877	Sense LncRNA	Chr03:10744908-10747647	1201
TCONS_00060890	Sense LncRNA	Chr03:11590328-11594973	988
TCONS_00060907	Sense LncRNA	Chr03:12675774-12681116	526
TCONS_00060937	Sense LncRNA	Chr03:13406580-13411660	1006
TCONS_00060938	Sense LncRNA	Chr03:13406580-13411660	1335
TCONS_00060965	Sense LncRNA	Chr03:14764264-14772183	1460
TCONS_00060993	Sense LncRNA	Chr03:16066927-16071107	1731
TCONS_00061010	Sense LncRNA	Chr03:16780852-16784724	503
TCONS_00061018	Sense LncRNA	Chr03:17041300-17049026	419
TCONS_00061031	Sense LncRNA	Chr03:17312271-17316654	1304
TCONS_00061038	Sense LncRNA	Chr03:17462474-17465209	1366
TCONS_00061040	Sense LncRNA	Chr03:17474668-17480778	1368
TCONS_00061063	Sense LncRNA	Chr03:18171769-18172512	364
TCONS_00061125	Sense LncRNA	Chr03:21091106-21095588	417
TCONS_00061417	Sense LncRNA	Chr03:11915934-11917185	257
TCONS_00061817	Sense LncRNA	Chr03:203366-213026	1596
TCONS_00061919	Sense LncRNA	Chr03:6294635-6296599	1646
TCONS_00061937	Sense LncRNA	Chr03:8367213-8373658	2674
TCONS_00061955	Sense LncRNA	Chr03:9622742-9628862	1238
TCONS_00061978	Sense LncRNA	Chr03:9946118-9955944	710
TCONS_00061982	Sense LncRNA	Chr03:10087161-10089562	655
TCONS_00062004	Sense LncRNA	Chr03:10675045-10677294	730
TCONS_00062009	Sense LncRNA	Chr03:10863892-10867678	612
TCONS_00062036	Sense LncRNA	Chr03:11685843-11691588	1140
TCONS_00062067	Sense LncRNA	Chr03:12941913-12945785	767
TCONS_00062083	Sense LncRNA	Chr03:13078877-13081171	1002
TCONS_00062186	Sense LncRNA	Chr03:16586185-16612110	276
TCONS_00062206	Sense LncRNA	Chr03:17041300-17049026	1639
TCONS_00062208	Sense LncRNA	Chr03:17041300-17049026	486
TCONS_00062213	Sense LncRNA	Chr03:17192847-17195159	916
TCONS_00062238	Sense LncRNA	Chr03:17563557-17565338	209
TCONS_00062308	Sense LncRNA	Chr03:19611337-19614183	428
TCONS_00062359	Sense LncRNA	Chr03:20627342-20632142	2327
TCONS_00062383	Sense LncRNA	Chr03:21428578-21431483	1458
TCONS_00062406	Sense LncRNA	Chr03:21731127-21742223	1871
TCONS_00062792	Sense LncRNA	Chr03:2263609-2269851	1455
TCONS_00062860	Sense LncRNA	Chr03:9946118-9955944	828
TCONS_00062861	Sense LncRNA	Chr03:10012413-10014779	1045
TCONS_00062895	Sense LncRNA	Chr03:11388426-11402082	3214
TCONS_00062941	Sense LncRNA	Chr03:14305476-14312983	1166
TCONS_00062970	Sense LncRNA	Chr03:15368473-15374787	1162
TCONS_00062971	Sense LncRNA	Chr03:15430451-15433220	959
TCONS_00062999	Sense LncRNA	Chr03:17041300-17049026	775
TCONS_00063048	Sense LncRNA	Chr03:19759456-19769680	660
TCONS_00063057	Sense LncRNA	Chr03:19918000-19921782	2170
TCONS_00063058	Sense LncRNA	Chr03:19918000-19921782	1001
TCONS_00063074	Sense LncRNA	Chr03:20140670-20302270	262
TCONS_00063077	Sense LncRNA	Chr03:20140670-20302270	1330
TCONS_00063103	Sense LncRNA	Chr03:21512571-21525570	1133
TCONS_00063107	Sense LncRNA	Chr03:21602294-21618403	3289
TCONS_00063703	Sense LncRNA	Chr03:235146-290063	1138
TCONS_00063717	Sense LncRNA	Chr03:726847-728898	801
TCONS_00063727	Sense LncRNA	Chr03:1854479-1890804	503
TCONS_00063748	Sense LncRNA	Chr03:2834388-2865403	775
TCONS_00063774	Sense LncRNA	Chr03:5198261-5204591	1782
TCONS_00063798	Sense LncRNA	Chr03:7817681-7824361	1127
TCONS_00063845	Sense LncRNA	Chr03:9946118-9955944	2780
TCONS_00063908	Sense LncRNA	Chr03:12076504-12079464	405
TCONS_00063969	Sense LncRNA	Chr03:14101984-14105012	1582
TCONS_00064010	Sense LncRNA	Chr03:15430451-15433220	1475
TCONS_00064011	Sense LncRNA	Chr03:15430451-15433220	728
TCONS_00064030	Sense LncRNA	Chr03:16396060-16398750	1408
TCONS_00064041	Sense LncRNA	Chr03:16625701-16626814	321
TCONS_00064047	Sense LncRNA	Chr03:17041300-17049026	1474
TCONS_00064056	Sense LncRNA	Chr03:17358519-17366743	2087
TCONS_00064072	Sense LncRNA	Chr03:17834810-17836600	1587
TCONS_00064108	Sense LncRNA	Chr03:19435023-19456409	590
TCONS_00064139	Sense LncRNA	Chr03:20140670-20302270	2429
TCONS_00064154	Sense LncRNA	Chr03:20627342-20632142	1957
TCONS_00064183	Sense LncRNA	Chr03:21512571-21525570	1870
TCONS_00064222	Sense LncRNA	Chr03:1251977-1257601	385
TCONS_00064753	Sense LncRNA	Chr03:3513503-3513902	311
TCONS_00064767	Sense LncRNA	Chr03:3999579-4012270	1687
TCONS_00064833	Sense LncRNA	Chr03:9238750-9247250	2247
TCONS_00064853	Sense LncRNA	Chr03:10479275-10481399	611
TCONS_00064864	Sense LncRNA	Chr03:10863892-10867678	990
TCONS_00064868	Sense LncRNA	Chr03:10935560-10945841	735
TCONS_00064893	Sense LncRNA	Chr03:12235990-12238009	1262
TCONS_00064894	Sense LncRNA	Chr03:12415107-12422457	2099
TCONS_00064906	Sense LncRNA	Chr03:12964805-12968959	787
TCONS_00064927	Sense LncRNA	Chr03:13833333-13837194	279
TCONS_00064972	Sense LncRNA	Chr03:15368473-15374787	353
TCONS_00064974	Sense LncRNA	Chr03:15430451-15433220	1340
TCONS_00064975	Sense LncRNA	Chr03:15430451-15433220	1241
TCONS_00064999	Sense LncRNA	Chr03:16586185-16612110	408
TCONS_00065010	Sense LncRNA	Chr03:16632404-16645389	374
TCONS_00065025	Sense LncRNA	Chr03:17430377-17431820	558
TCONS_00065057	Sense LncRNA	Chr03:18976550-18982970	595
TCONS_00065059	Sense LncRNA	Chr03:18985224-18990375	532
TCONS_00065127	Sense LncRNA	Chr03:21353147-21357390	923
TCONS_00065445	Sense LncRNA	Chr03:2263609-2269851	417
TCONS_00065464	Sense LncRNA	Chr03:4538101-4543458	635
TCONS_00065477	Sense LncRNA	Chr03:9109611-9115872	678
TCONS_00065498	Sense LncRNA	Chr03:9946118-9955944	1959
TCONS_00065543	Sense LncRNA	Chr03:12415107-12422457	1403
TCONS_00065592	Sense LncRNA	Chr03:14934670-14943262	1605
TCONS_00065621	Sense LncRNA	Chr03:16780852-16784724	1038
TCONS_00065648	Sense LncRNA	Chr03:18924585-18939295	719
TCONS_00065652	Sense LncRNA	Chr03:19259145-19264493	707
TCONS_00065660	Sense LncRNA	Chr03:19759456-19769680	904
TCONS_00065661	Sense LncRNA	Chr03:19759456-19769680	2311
TCONS_00065667	Sense LncRNA	Chr03:19918000-19921782	864
TCONS_00065762	Sense LncRNA	Chr03:3672969-3680242	349
TCONS_00066184	Sense LncRNA	Chr03:329655-338055	1579
TCONS_00066187	Sense LncRNA	Chr03:1461119-1471722	1014
TCONS_00066201	Sense LncRNA	Chr03:2275731-2300097	1892
TCONS_00066215	Sense LncRNA	Chr03:2834388-2865403	733
TCONS_00066221	Sense LncRNA	Chr03:2889038-2973203	234
TCONS_00066233	Sense LncRNA	Chr03:4918664-4924254	1176
TCONS_00066237	Sense LncRNA	Chr03:5198261-5204591	2384
TCONS_00066240	Sense LncRNA	Chr03:5294385-5308778	393
TCONS_00066242	Sense LncRNA	Chr03:5316305-5319317	375
TCONS_00066244	Sense LncRNA	Chr03:5377643-5437834	271
TCONS_00066253	Sense LncRNA	Chr03:7499124-7503406	496
TCONS_00066256	Sense LncRNA	Chr03:7731431-7737211	1556
TCONS_00066290	Sense LncRNA	Chr03:9982690-9984228	465
TCONS_00066298	Sense LncRNA	Chr03:10497269-10505660	1864
TCONS_00066305	Sense LncRNA	Chr03:10690647-10695205	1081
TCONS_00066329	Sense LncRNA	Chr03:11741636-11745427	534
TCONS_00066337	Sense LncRNA	Chr03:12155307-12161304	3013
TCONS_00066338	Sense LncRNA	Chr03:12155307-12161304	3098
TCONS_00066342	Sense LncRNA	Chr03:12510052-12517296	951
TCONS_00066365	Sense LncRNA	Chr03:13049046-13055372	381
TCONS_00066374	Sense LncRNA	Chr03:13257412-13261064	1176
TCONS_00066376	Sense LncRNA	Chr03:13346546-13353381	1773
TCONS_00066392	Sense LncRNA	Chr03:14124950-14127476	1240
TCONS_00066400	Sense LncRNA	Chr03:14396512-14400583	2048
TCONS_00066420	Sense LncRNA	Chr03:14981548-14984038	1368
TCONS_00066430	Sense LncRNA	Chr03:15325099-15330699	1039
TCONS_00066432	Sense LncRNA	Chr03:15368473-15374787	822
TCONS_00066436	Sense LncRNA	Chr03:15925040-15927927	236
TCONS_00066440	Sense LncRNA	Chr03:16323646-16328807	307
TCONS_00066443	Sense LncRNA	Chr03:16388476-16391317	856
TCONS_00066445	Sense LncRNA	Chr03:16422722-16447636	680
TCONS_00066453	Sense LncRNA	Chr03:16780852-16784724	1009
TCONS_00066457	Sense LncRNA	Chr03:17075347-17092144	619
TCONS_00066470	Sense LncRNA	Chr03:17501020-17505453	1866
TCONS_00066471	Sense LncRNA	Chr03:17501020-17505453	1836
TCONS_00066472	Sense LncRNA	Chr03:17501020-17505453	1738
TCONS_00066474	Sense LncRNA	Chr03:17563557-17565338	797
TCONS_00066494	Sense LncRNA	Chr03:18985224-18990375	757
TCONS_00066511	Sense LncRNA	Chr03:19759456-19769680	2091
TCONS_00066512	Sense LncRNA	Chr03:19759456-19769680	1627
TCONS_00066529	Sense LncRNA	Chr03:20140670-20302270	723
TCONS_00066533	Sense LncRNA	Chr03:20140670-20302270	337
TCONS_00066534	Sense LncRNA	Chr03:20140670-20302270	424
TCONS_00067048	Sense LncRNA	Chr03:9754370-9790950	702
TCONS_00067078	Sense LncRNA	Chr03:10844240-10846496	1125
TCONS_00067101	Sense LncRNA	Chr03:12047440-12055476	602
TCONS_00067139	Sense LncRNA	Chr03:13346546-13353381	1292
TCONS_00067176	Sense LncRNA	Chr03:15368473-15374787	1138
TCONS_00067198	Sense LncRNA	Chr03:16508409-16512198	827
TCONS_00067257	Sense LncRNA	Chr03:19759456-19769680	373
TCONS_00067281	Sense LncRNA	Chr03:20627342-20632142	657
TCONS_00067289	Sense LncRNA	Chr03:21051117-21057439	611
TCONS_00067308	Sense LncRNA	Chr03:818721-837379	440
TCONS_00067502	Sense LncRNA	Chr03:17095746-17098278	227
TCONS_00067606	Sense LncRNA	Chr03:5038922-5046417	1017
TCONS_00067609	Sense LncRNA	Chr03:6517695-6520804	1231
TCONS_00067633	Sense LncRNA	Chr03:9946118-9955944	1446
TCONS_00067684	Sense LncRNA	Chr03:12715164-12721376	1980
TCONS_00067685	Sense LncRNA	Chr03:12715164-12721376	1930
TCONS_00067686	Sense LncRNA	Chr03:12715164-12721376	2012
TCONS_00067690	Sense LncRNA	Chr03:12964805-12968959	1607
TCONS_00067700	Sense LncRNA	Chr03:13346546-13353381	793
TCONS_00067709	Sense LncRNA	Chr03:14172594-14175580	1161
TCONS_00067724	Sense LncRNA	Chr03:15861023-15863733	376
TCONS_00067737	Sense LncRNA	Chr03:17041300-17049026	1464
TCONS_00067764	Sense LncRNA	Chr03:19932552-19942500	2027
TCONS_00067788	Sense LncRNA	Chr03:21602294-21618403	3434
TCONS_00068689	Sense LncRNA	Chr03:203366-213026	2162
TCONS_00068729	Sense LncRNA	Chr03:1925736-1934372	2662
TCONS_00068802	Sense LncRNA	Chr03:3804392-3809973	809
TCONS_00068816	Sense LncRNA	Chr03:4344151-4354296	685
TCONS_00068879	Sense LncRNA	Chr03:7942503-7949023	1374
TCONS_00068930	Sense LncRNA	Chr03:9886940-9891240	2730
TCONS_00068962	Sense LncRNA	Chr03:10675045-10677294	676
TCONS_00068966	Sense LncRNA	Chr03:10744908-10747647	1208
TCONS_00068972	Sense LncRNA	Chr03:10844240-10846496	1573
TCONS_00069031	Sense LncRNA	Chr03:12130439-12132638	355
TCONS_00069052	Sense LncRNA	Chr03:12715164-12721376	3165
TCONS_00069064	Sense LncRNA	Chr03:12905450-12915972	1316
TCONS_00069136	Sense LncRNA	Chr03:14305476-14312983	2454
TCONS_00069137	Sense LncRNA	Chr03:14305476-14312983	1171
TCONS_00069154	Sense LncRNA	Chr03:14502750-14506324	453
TCONS_00069194	Sense LncRNA	Chr03:15368473-15374787	1171
TCONS_00069198	Sense LncRNA	Chr03:15430451-15433220	380
TCONS_00069221	Sense LncRNA	Chr03:16193498-16198998	1122
TCONS_00069288	Sense LncRNA	Chr03:17808988-17812998	516
TCONS_00069327	Sense LncRNA	Chr03:18924585-18939295	1496
TCONS_00069335	Sense LncRNA	Chr03:18985224-18990375	783
TCONS_00069341	Sense LncRNA	Chr03:19111313-19187481	2448
TCONS_00069381	Sense LncRNA	Chr03:19918000-19921782	2189
TCONS_00069397	Sense LncRNA	Chr03:20065700-20073788	760
TCONS_00069426	Sense LncRNA	Chr03:20559898-20564369	1381
TCONS_00069767	Sense LncRNA	Chr03:3804392-3809973	239
TCONS_00069788	Sense LncRNA	Chr03:9410009-9411597	359
TCONS_00069817	Sense LncRNA	Chr03:10744908-10747647	706
TCONS_00069878	Sense LncRNA	Chr03:14416843-14419424	776
TCONS_00069880	Sense LncRNA	Chr03:14521466-14522536	873
TCONS_00069915	Sense LncRNA	Chr03:17501020-17505453	556
TCONS_00069934	Sense LncRNA	Chr03:19759456-19769680	2025
TCONS_00069944	Sense LncRNA	Chr03:20559898-20564369	915
TCONS_00069952	Sense LncRNA	Chr03:21512571-21525570	922
TCONS_00071322	Sense LncRNA	Chr04:23047088-23050320	296
TCONS_00071323	Sense LncRNA	Chr04:23047088-23050320	658
TCONS_00071420	Sense LncRNA	Chr04:336614-341875	1168
TCONS_00071509	Sense LncRNA	Chr04:1356583-1360039	1147
TCONS_00071512	Sense LncRNA	Chr04:1393997-1397171	1351
TCONS_00071569	Sense LncRNA	Chr04:2545710-2590051	478
TCONS_00071581	Sense LncRNA	Chr04:2545710-2590051	376
TCONS_00071597	Sense LncRNA	Chr04:2733173-2738614	673
TCONS_00071600	Sense LncRNA	Chr04:2733173-2738614	258
TCONS_00071603	Sense LncRNA	Chr04:2744407-2752747	433
TCONS_00071695	Sense LncRNA	Chr04:3900860-3907914	3207
TCONS_00071726	Sense LncRNA	Chr04:4649015-4653539	1597
TCONS_00071784	Sense LncRNA	Chr04:5653633-5674017	596
TCONS_00071792	Sense LncRNA	Chr04:5752019-5755151	456
TCONS_00071800	Sense LncRNA	Chr04:5850074-5852422	326
TCONS_00071801	Sense LncRNA	Chr04:5850074-5852422	737
TCONS_00071813	Sense LncRNA	Chr04:5968958-5972514	463
TCONS_00071818	Sense LncRNA	Chr04:6030596-6033353	430
TCONS_00071859	Sense LncRNA	Chr04:6577397-6579675	580
TCONS_00071868	Sense LncRNA	Chr04:6688587-6692338	1009
TCONS_00071890	Sense LncRNA	Chr04:7002373-7005313	420
TCONS_00071908	Sense LncRNA	Chr04:7278336-7282821	1215
TCONS_00071918	Sense LncRNA	Chr04:7493684-7498016	1040
TCONS_00071947	Sense LncRNA	Chr04:7807152-7812761	1437
TCONS_00071982	Sense LncRNA	Chr04:8557986-8561296	1116
TCONS_00071986	Sense LncRNA	Chr04:8579597-8585159	466
TCONS_00072002	Sense LncRNA	Chr04:8791787-8799994	903
TCONS_00072019	Sense LncRNA	Chr04:9101022-9104644	315
TCONS_00072127	Sense LncRNA	Chr04:11366306-11370210	1093
TCONS_00072138	Sense LncRNA	Chr04:11599101-11605327	295
TCONS_00072164	Sense LncRNA	Chr04:14264103-14270179	1560
TCONS_00072166	Sense LncRNA	Chr04:14264103-14270179	814
TCONS_00072167	Sense LncRNA	Chr04:14264103-14270179	644
TCONS_00072220	Sense LncRNA	Chr04:15913789-15915321	539
TCONS_00072227	Sense LncRNA	Chr04:16027260-16034006	593
TCONS_00072325	Sense LncRNA	Chr04:17357711-17419303	558
TCONS_00072403	Sense LncRNA	Chr04:18542920-18546569	1246
TCONS_00072409	Sense LncRNA	Chr04:18652432-18662366	2839
TCONS_00072544	Sense LncRNA	Chr04:20422177-20424785	827
TCONS_00072565	Sense LncRNA	Chr04:20524527-20529602	532
TCONS_00072602	Sense LncRNA	Chr04:20891802-20895942	812
TCONS_00072620	Sense LncRNA	Chr04:21121007-21127182	425
TCONS_00072668	Sense LncRNA	Chr04:21423785-21426283	1429
TCONS_00072672	Sense LncRNA	Chr04:21433841-21439139	1090
TCONS_00072678	Sense LncRNA	Chr04:21495204-21501862	2269
TCONS_00072679	Sense LncRNA	Chr04:21503844-21507428	971
TCONS_00072690	Sense LncRNA	Chr04:21612667-21620592	253
TCONS_00072692	Sense LncRNA	Chr04:21612667-21620592	285
TCONS_00072696	Sense LncRNA	Chr04:21630945-21636778	1192
TCONS_00072713	Sense LncRNA	Chr04:21768732-21786084	1495
TCONS_00072715	Sense LncRNA	Chr04:21768732-21786084	1528
TCONS_00072762	Sense LncRNA	Chr04:22203923-22205725	617
TCONS_00072770	Sense LncRNA	Chr04:22273730-22275438	446
TCONS_00072791	Sense LncRNA	Chr04:22823688-22828224	820
TCONS_00072793	Sense LncRNA	Chr04:22823688-22828224	433
TCONS_00072822	Sense LncRNA	Chr04:23114076-23145797	789
TCONS_00072827	Sense LncRNA	Chr04:23148255-23157882	1763
TCONS_00072833	Sense LncRNA	Chr04:23190589-23192662	931
TCONS_00072844	Sense LncRNA	Chr04:23265679-23268358	542
TCONS_00072889	Sense LncRNA	Chr04:23639626-23734459	1075
TCONS_00072911	Sense LncRNA	Chr04:23908835-23911353	465
TCONS_00072931	Sense LncRNA	Chr04:24030840-24034311	1219
TCONS_00072940	Sense LncRNA	Chr04:24164234-24172377	2156
TCONS_00072942	Sense LncRNA	Chr04:24164234-24172377	573
TCONS_00072955	Sense LncRNA	Chr04:24246566-24252528	2637
TCONS_00073226	Sense LncRNA	Chr04:8629387-8631359	531
TCONS_00073673	Sense LncRNA	Chr04:2171412-2176097	474
TCONS_00073708	Sense LncRNA	Chr04:2733173-2738614	1081
TCONS_00073710	Sense LncRNA	Chr04:2744407-2752747	1381
TCONS_00073725	Sense LncRNA	Chr04:3119767-3129321	1938
TCONS_00073726	Sense LncRNA	Chr04:3165927-3168318	737
TCONS_00073804	Sense LncRNA	Chr04:5755443-5757164	529
TCONS_00073826	Sense LncRNA	Chr04:6182423-6186961	440
TCONS_00073903	Sense LncRNA	Chr04:7965558-7968617	2090
TCONS_00073993	Sense LncRNA	Chr04:11338586-11343990	1007
TCONS_00074013	Sense LncRNA	Chr04:15373850-15384953	1733
TCONS_00074040	Sense LncRNA	Chr04:16472426-16475107	684
TCONS_00074075	Sense LncRNA	Chr04:17357711-17419303	725
TCONS_00074121	Sense LncRNA	Chr04:18652432-18662366	807
TCONS_00074152	Sense LncRNA	Chr04:19490625-19498523	1400
TCONS_00074154	Sense LncRNA	Chr04:19490625-19498523	538
TCONS_00074166	Sense LncRNA	Chr04:19646505-19677893	217
TCONS_00074236	Sense LncRNA	Chr04:21330846-21337456	367
TCONS_00074271	Sense LncRNA	Chr04:21768732-21786084	1389
TCONS_00074272	Sense LncRNA	Chr04:21768732-21786084	1387
TCONS_00074293	Sense LncRNA	Chr04:22029769-22036657	465
TCONS_00074326	Sense LncRNA	Chr04:23148255-23157882	1762
TCONS_00074361	Sense LncRNA	Chr04:24003123-24008191	1601
TCONS_00074484	Sense LncRNA	Chr04:5453526-5460571	280
TCONS_00074603	Sense LncRNA	Chr04:11895499-11905803	419
TCONS_00074872	Sense LncRNA	Chr04:456999-458567	845
TCONS_00074876	Sense LncRNA	Chr04:668149-695737	1133
TCONS_00074877	Sense LncRNA	Chr04:668149-695737	550
TCONS_00074879	Sense LncRNA	Chr04:833435-836925	951
TCONS_00074918	Sense LncRNA	Chr04:1393997-1397171	689
TCONS_00074921	Sense LncRNA	Chr04:1462663-1467964	345
TCONS_00074925	Sense LncRNA	Chr04:1499190-1502789	1173
TCONS_00074940	Sense LncRNA	Chr04:2507398-2512970	518
TCONS_00074960	Sense LncRNA	Chr04:3174995-3180177	900
TCONS_00075006	Sense LncRNA	Chr04:4395455-4400224	1600
TCONS_00075011	Sense LncRNA	Chr04:4649015-4653539	514
TCONS_00075023	Sense LncRNA	Chr04:5549893-5559284	3149
TCONS_00075030	Sense LncRNA	Chr04:5968958-5972514	245
TCONS_00075090	Sense LncRNA	Chr04:8809315-8846663	3023
TCONS_00075117	Sense LncRNA	Chr04:10322928-10337564	746
TCONS_00075121	Sense LncRNA	Chr04:10654196-10656428	625
TCONS_00075141	Sense LncRNA	Chr04:14768397-14771269	354
TCONS_00075146	Sense LncRNA	Chr04:15813237-15817520	757
TCONS_00075149	Sense LncRNA	Chr04:16027260-16034006	1052
TCONS_00075188	Sense LncRNA	Chr04:17529445-17534908	932
TCONS_00075214	Sense LncRNA	Chr04:18652432-18662366	582
TCONS_00075219	Sense LncRNA	Chr04:18745283-18747653	773
TCONS_00075225	Sense LncRNA	Chr04:19286987-19291368	1146
TCONS_00075230	Sense LncRNA	Chr04:19490625-19498523	4046
TCONS_00075254	Sense LncRNA	Chr04:20483453-20486490	1352
TCONS_00075256	Sense LncRNA	Chr04:20524527-20529602	381
TCONS_00075271	Sense LncRNA	Chr04:20974480-20979905	1653
TCONS_00075342	Sense LncRNA	Chr04:22869177-22877958	945
TCONS_00075353	Sense LncRNA	Chr04:23169176-23177106	992
TCONS_00075358	Sense LncRNA	Chr04:23269613-23274299	1135
TCONS_00075363	Sense LncRNA	Chr04:23373473-23383941	2486
TCONS_00075375	Sense LncRNA	Chr04:23972482-23976951	502
TCONS_00075936	Sense LncRNA	Chr04:3050329-3055079	1890
TCONS_00075987	Sense LncRNA	Chr04:5752019-5755151	237
TCONS_00076010	Sense LncRNA	Chr04:6384059-6435909	205
TCONS_00076041	Sense LncRNA	Chr04:7681036-7689380	1025
TCONS_00076049	Sense LncRNA	Chr04:7807152-7812761	2030
TCONS_00076074	Sense LncRNA	Chr04:9150691-9160981	1090
TCONS_00076106	Sense LncRNA	Chr04:11366306-11370210	358
TCONS_00076115	Sense LncRNA	Chr04:14264103-14270179	1588
TCONS_00076116	Sense LncRNA	Chr04:14264103-14270179	555
TCONS_00076122	Sense LncRNA	Chr04:14536111-14542480	1479
TCONS_00076132	Sense LncRNA	Chr04:15452230-15454551	319
TCONS_00076133	Sense LncRNA	Chr04:15452230-15454551	575
TCONS_00076180	Sense LncRNA	Chr04:17274006-17276046	436
TCONS_00076191	Sense LncRNA	Chr04:17696520-17698166	325
TCONS_00076237	Sense LncRNA	Chr04:19490625-19498523	1264
TCONS_00076274	Sense LncRNA	Chr04:20591334-20740758	719
TCONS_00076319	Sense LncRNA	Chr04:21375671-21384966	1301
TCONS_00076326	Sense LncRNA	Chr04:21509516-21515228	3138
TCONS_00076333	Sense LncRNA	Chr04:21709622-21715940	407
TCONS_00076339	Sense LncRNA	Chr04:21768732-21786084	1388
TCONS_00076344	Sense LncRNA	Chr04:21789854-21801446	995
TCONS_00076349	Sense LncRNA	Chr04:21813169-21819470	1272
TCONS_00076368	Sense LncRNA	Chr04:22368954-22373201	413
TCONS_00076419	Sense LncRNA	Chr04:24003123-24008191	1755
TCONS_00076432	Sense LncRNA	Chr04:24178228-24181971	976
TCONS_00076433	Sense LncRNA	Chr04:24178228-24181971	807
TCONS_00076865	Sense LncRNA	Chr04:907471-917630	1552
TCONS_00076910	Sense LncRNA	Chr04:3174995-3180177	769
TCONS_00076921	Sense LncRNA	Chr04:3780234-3784816	574
TCONS_00076933	Sense LncRNA	Chr04:5461966-5466375	765
TCONS_00076936	Sense LncRNA	Chr04:5549893-5559284	1026
TCONS_00076976	Sense LncRNA	Chr04:6488247-6489272	771
TCONS_00076977	Sense LncRNA	Chr04:6557381-6561204	1261
TCONS_00076986	Sense LncRNA	Chr04:6841525-6852038	571
TCONS_00077015	Sense LncRNA	Chr04:8809315-8846663	6706
TCONS_00077024	Sense LncRNA	Chr04:9229745-9232893	985
TCONS_00077093	Sense LncRNA	Chr04:16525841-16530613	1075
TCONS_00077117	Sense LncRNA	Chr04:17357711-17419303	372
TCONS_00077127	Sense LncRNA	Chr04:17539628-17543635	1444
TCONS_00077214	Sense LncRNA	Chr04:20883483-20890694	721
TCONS_00077229	Sense LncRNA	Chr04:21301040-21305260	2691
TCONS_00077243	Sense LncRNA	Chr04:21525845-21528579	1225
TCONS_00077267	Sense LncRNA	Chr04:22395505-22401053	1042
TCONS_00077594	Sense LncRNA	Chr04:8747671-8758120	239
TCONS_00077943	Sense LncRNA	Chr04:1499190-1502789	1180
TCONS_00078010	Sense LncRNA	Chr04:3326436-3332965	774
TCONS_00078068	Sense LncRNA	Chr04:5653633-5674017	394
TCONS_00078080	Sense LncRNA	Chr04:5766788-5834903	574
TCONS_00078097	Sense LncRNA	Chr04:6182423-6186961	607
TCONS_00078103	Sense LncRNA	Chr04:6332954-6367223	451
TCONS_00078118	Sense LncRNA	Chr04:6841525-6852038	811
TCONS_00078139	Sense LncRNA	Chr04:7681036-7689380	968
TCONS_00078197	Sense LncRNA	Chr04:10751899-10757549	742
TCONS_00078216	Sense LncRNA	Chr04:12083723-12086857	892
TCONS_00078314	Sense LncRNA	Chr04:18652432-18662366	2409
TCONS_00078334	Sense LncRNA	Chr04:19457518-19461824	376
TCONS_00078359	Sense LncRNA	Chr04:19954424-19958889	1664
TCONS_00078386	Sense LncRNA	Chr04:20524527-20529602	533
TCONS_00078399	Sense LncRNA	Chr04:20858561-20882666	456
TCONS_00078428	Sense LncRNA	Chr04:21375671-21384966	2546
TCONS_00078511	Sense LncRNA	Chr04:23441032-23453210	4208
TCONS_00078515	Sense LncRNA	Chr04:23513973-23522854	3514
TCONS_00078539	Sense LncRNA	Chr04:24018377-24021362	553
TCONS_00078922	Sense LncRNA	Chr04:907471-917630	2165
TCONS_00078926	Sense LncRNA	Chr04:1206233-1209891	864
TCONS_00078930	Sense LncRNA	Chr04:1418652-1419958	928
TCONS_00078971	Sense LncRNA	Chr04:3326436-3332965	956
TCONS_00078993	Sense LncRNA	Chr04:4649015-4653539	954
TCONS_00079021	Sense LncRNA	Chr04:6638731-6650232	3184
TCONS_00079079	Sense LncRNA	Chr04:14536111-14542480	411
TCONS_00079128	Sense LncRNA	Chr04:18009603-18014927	2102
TCONS_00079153	Sense LncRNA	Chr04:19646505-19677893	504
TCONS_00079191	Sense LncRNA	Chr04:21768732-21786084	1366
TCONS_00079811	Sense LncRNA	Chr04:1400672-1403508	560
TCONS_00079830	Sense LncRNA	Chr04:2429798-2435391	1615
TCONS_00079842	Sense LncRNA	Chr04:2545710-2590051	1862
TCONS_00079869	Sense LncRNA	Chr04:3165927-3168318	1179
TCONS_00079910	Sense LncRNA	Chr04:5336956-5344552	1905
TCONS_00079920	Sense LncRNA	Chr04:5584323-5586902	881
TCONS_00079930	Sense LncRNA	Chr04:5653633-5674017	1088
TCONS_00079936	Sense LncRNA	Chr04:5968958-5972514	1326
TCONS_00079941	Sense LncRNA	Chr04:6105513-6106498	528
TCONS_00079962	Sense LncRNA	Chr04:6841525-6852038	1015
TCONS_00079976	Sense LncRNA	Chr04:7807152-7812761	472
TCONS_00080049	Sense LncRNA	Chr04:15373850-15384953	1370
TCONS_00080069	Sense LncRNA	Chr04:16106029-16113516	317
TCONS_00080134	Sense LncRNA	Chr04:18567778-18576288	500
TCONS_00080212	Sense LncRNA	Chr04:21301040-21305260	1655
TCONS_00080217	Sense LncRNA	Chr04:21391714-21395937	1162
TCONS_00080285	Sense LncRNA	Chr04:23639626-23734459	552
TCONS_00080287	Sense LncRNA	Chr04:23639626-23734459	858
TCONS_00080297	Sense LncRNA	Chr04:23737843-23739169	436
TCONS_00080334	Sense LncRNA	Chr04:24261558-24264616	1371
TCONS_00080754	Sense LncRNA	Chr04:668149-695737	1006
TCONS_00080770	Sense LncRNA	Chr04:1330286-1352412	890
TCONS_00080796	Sense LncRNA	Chr04:2733173-2738614	1873
TCONS_00080826	Sense LncRNA	Chr04:3900860-3907914	2074
TCONS_00080827	Sense LncRNA	Chr04:3925057-3930137	1059
TCONS_00080859	Sense LncRNA	Chr04:5850074-5852422	834
TCONS_00080866	Sense LncRNA	Chr04:6310284-6316135	2295
TCONS_00080869	Sense LncRNA	Chr04:6557381-6561204	2305
TCONS_00080878	Sense LncRNA	Chr04:7278336-7282821	1622
TCONS_00080889	Sense LncRNA	Chr04:7681036-7689380	2075
TCONS_00080906	Sense LncRNA	Chr04:8579597-8585159	621
TCONS_00080957	Sense LncRNA	Chr04:14264103-14270179	564
TCONS_00081017	Sense LncRNA	Chr04:18453524-18457046	659
TCONS_00081042	Sense LncRNA	Chr04:19854398-19855928	1193
TCONS_00081095	Sense LncRNA	Chr04:21433841-21439139	453
TCONS_00081164	Sense LncRNA	Chr04:23812174-23820036	604
TCONS_00081172	Sense LncRNA	Chr04:23894027-23901275	403
TCONS_00081180	Sense LncRNA	Chr04:24003123-24008191	1947
TCONS_00081181	Sense LncRNA	Chr04:24003123-24008191	1363
TCONS_00081256	Sense LncRNA	Chr04:6773566-6777855	580
TCONS_00081452	Sense LncRNA	Chr04:2744407-2752747	684
TCONS_00081497	Sense LncRNA	Chr04:5336956-5344552	1584
TCONS_00081516	Sense LncRNA	Chr04:6828996-6835403	452
TCONS_00081548	Sense LncRNA	Chr04:9229745-9232893	403
TCONS_00081570	Sense LncRNA	Chr04:15820725-15832673	924
TCONS_00081590	Sense LncRNA	Chr04:17902208-17907515	1298
TCONS_00081601	Sense LncRNA	Chr04:18652432-18662366	1973
TCONS_00081642	Sense LncRNA	Chr04:20974480-20979905	1611
TCONS_00081654	Sense LncRNA	Chr04:21375671-21384966	583
TCONS_00081668	Sense LncRNA	Chr04:21740066-21756447	1784
TCONS_00081683	Sense LncRNA	Chr04:23000505-23006616	1158
TCONS_00081692	Sense LncRNA	Chr04:23373473-23383941	329
TCONS_00081708	Sense LncRNA	Chr04:23513973-23522854	1811
TCONS_00081722	Sense LncRNA	Chr04:24178228-24181971	1233
TCONS_00081723	Sense LncRNA	Chr04:24178228-24181971	365
TCONS_00082036	Sense LncRNA	Chr04:21117406-21118782	533
TCONS_00082091	Sense LncRNA	Chr04:336614-341875	1354
TCONS_00082105	Sense LncRNA	Chr04:1118245-1124388	3067
TCONS_00082115	Sense LncRNA	Chr04:2118923-2122212	1341
TCONS_00082119	Sense LncRNA	Chr04:2183283-2213744	1451
TCONS_00082128	Sense LncRNA	Chr04:2429798-2435391	1365
TCONS_00082140	Sense LncRNA	Chr04:2744407-2752747	321
TCONS_00082144	Sense LncRNA	Chr04:2890416-2891954	462
TCONS_00082148	Sense LncRNA	Chr04:2957593-2964515	1774
TCONS_00082202	Sense LncRNA	Chr04:5653633-5674017	549
TCONS_00082218	Sense LncRNA	Chr04:5915180-5961741	238
TCONS_00082222	Sense LncRNA	Chr04:5915180-5961741	278
TCONS_00082263	Sense LncRNA	Chr04:7807152-7812761	1717
TCONS_00082271	Sense LncRNA	Chr04:8731158-8736093	1353
TCONS_00082273	Sense LncRNA	Chr04:8809315-8846663	4270
TCONS_00082274	Sense LncRNA	Chr04:8997646-9004321	791
TCONS_00082295	Sense LncRNA	Chr04:10353362-10361173	227
TCONS_00082307	Sense LncRNA	Chr04:11599101-11605327	265
TCONS_00082332	Sense LncRNA	Chr04:16027260-16034006	1685
TCONS_00082368	Sense LncRNA	Chr04:18652432-18662366	2164
TCONS_00082370	Sense LncRNA	Chr04:18735169-18736329	565
TCONS_00082426	Sense LncRNA	Chr04:20807328-20810936	528
TCONS_00082437	Sense LncRNA	Chr04:20981643-20986248	615
TCONS_00082459	Sense LncRNA	Chr04:21740066-21756447	1001
TCONS_00082472	Sense LncRNA	Chr04:21813169-21819470	537
TCONS_00082492	Sense LncRNA	Chr04:22528398-22537272	1222
TCONS_00082495	Sense LncRNA	Chr04:22835759-22838204	1056
TCONS_00082502	Sense LncRNA	Chr04:23114076-23145797	803
TCONS_00082516	Sense LncRNA	Chr04:23639626-23734459	1248
TCONS_00082519	Sense LncRNA	Chr04:23639626-23734459	794
TCONS_00082542	Sense LncRNA	Chr04:23984321-23985803	458
TCONS_00082547	Sense LncRNA	Chr04:24003123-24008191	1642
TCONS_00082612	Sense LncRNA	Chr04:3097247-3103011	417
TCONS_00082911	Sense LncRNA	Chr04:2183283-2213744	1363
TCONS_00082922	Sense LncRNA	Chr04:2689947-2693017	1121
TCONS_00082939	Sense LncRNA	Chr04:3174995-3180177	1253
TCONS_00082941	Sense LncRNA	Chr04:3326436-3332965	824
TCONS_00082977	Sense LncRNA	Chr04:5653633-5674017	527
TCONS_00082981	Sense LncRNA	Chr04:5653633-5674017	240
TCONS_00082996	Sense LncRNA	Chr04:6091928-6092801	375
TCONS_00083002	Sense LncRNA	Chr04:6332954-6367223	383
TCONS_00083026	Sense LncRNA	Chr04:7493684-7498016	1179
TCONS_00083044	Sense LncRNA	Chr04:9127340-9133458	520
TCONS_00083047	Sense LncRNA	Chr04:9167677-9174163	1091
TCONS_00083107	Sense LncRNA	Chr04:18009603-18014927	1738
TCONS_00083108	Sense LncRNA	Chr04:18182973-18187135	1781
TCONS_00083114	Sense LncRNA	Chr04:18567778-18576288	343
TCONS_00083119	Sense LncRNA	Chr04:18652432-18662366	2771
TCONS_00083129	Sense LncRNA	Chr04:19474251-19486773	671
TCONS_00083173	Sense LncRNA	Chr04:21740066-21756447	638
TCONS_00083175	Sense LncRNA	Chr04:21740066-21756447	1509
TCONS_00083176	Sense LncRNA	Chr04:21740066-21756447	1554
TCONS_00083177	Sense LncRNA	Chr04:21740066-21756447	1065
TCONS_00083181	Sense LncRNA	Chr04:21789854-21801446	1096
TCONS_00083182	Sense LncRNA	Chr04:21789854-21801446	843
TCONS_00083206	Sense LncRNA	Chr04:23441032-23453210	2882
TCONS_00083443	Sense LncRNA	Chr04:846200-851960	1407
TCONS_00083452	Sense LncRNA	Chr04:1468306-1471295	855
TCONS_00083460	Sense LncRNA	Chr04:2545710-2590051	729
TCONS_00083466	Sense LncRNA	Chr04:2606457-2615456	880
TCONS_00083476	Sense LncRNA	Chr04:3050329-3055079	389
TCONS_00083494	Sense LncRNA	Chr04:4430956-4453367	265
TCONS_00083512	Sense LncRNA	Chr04:5766788-5834903	221
TCONS_00083523	Sense LncRNA	Chr04:6332954-6367223	583
TCONS_00083529	Sense LncRNA	Chr04:6638731-6650232	917
TCONS_00083546	Sense LncRNA	Chr04:7477132-7489539	1523
TCONS_00083567	Sense LncRNA	Chr04:10123767-10134373	449
TCONS_00083599	Sense LncRNA	Chr04:16517052-16521449	478
TCONS_00083601	Sense LncRNA	Chr04:17276885-17281068	1766
TCONS_00083634	Sense LncRNA	Chr04:19490625-19498523	2699
TCONS_00083638	Sense LncRNA	Chr04:19913346-19919183	883
TCONS_00083640	Sense LncRNA	Chr04:20289867-20293731	2267
TCONS_00083657	Sense LncRNA	Chr04:20883483-20890694	978
TCONS_00083668	Sense LncRNA	Chr04:21433841-21439139	1481
TCONS_00083674	Sense LncRNA	Chr04:21762904-21766835	719
TCONS_00083705	Sense LncRNA	Chr04:23639626-23734459	499
TCONS_00083718	Sense LncRNA	Chr04:24003123-24008191	1504
TCONS_00083721	Sense LncRNA	Chr04:24104302-24107127	1543
TCONS_00084027	Sense LncRNA	Chr04:7006454-7011002	470
TCONS_00084579	Sense LncRNA	Chr04:668149-695737	1218
TCONS_00084636	Sense LncRNA	Chr04:2606457-2615456	2549
TCONS_00084671	Sense LncRNA	Chr04:3266831-3268747	1147
TCONS_00084687	Sense LncRNA	Chr04:3740439-3743775	611
TCONS_00084694	Sense LncRNA	Chr04:3761853-3773506	1249
TCONS_00084763	Sense LncRNA	Chr04:5850074-5852422	410
TCONS_00084772	Sense LncRNA	Chr04:6065906-6071554	992
TCONS_00084808	Sense LncRNA	Chr04:6841525-6852038	1640
TCONS_00084837	Sense LncRNA	Chr04:7681036-7689380	1607
TCONS_00085025	Sense LncRNA	Chr04:14536111-14542480	603
TCONS_00085070	Sense LncRNA	Chr04:16027260-16034006	1551
TCONS_00085112	Sense LncRNA	Chr04:17083311-17091314	1903
TCONS_00085116	Sense LncRNA	Chr04:17276885-17281068	1929
TCONS_00085168	Sense LncRNA	Chr04:18404763-18408774	727
TCONS_00085169	Sense LncRNA	Chr04:18404763-18408774	424
TCONS_00085179	Sense LncRNA	Chr04:18652432-18662366	4032
TCONS_00085180	Sense LncRNA	Chr04:18652432-18662366	2706
TCONS_00085181	Sense LncRNA	Chr04:18652432-18662366	1622
TCONS_00085201	Sense LncRNA	Chr04:19457518-19461824	692
TCONS_00085211	Sense LncRNA	Chr04:19913346-19919183	1019
TCONS_00085228	Sense LncRNA	Chr04:20289867-20293731	937
TCONS_00085280	Sense LncRNA	Chr04:20974480-20979905	3111
TCONS_00085289	Sense LncRNA	Chr04:21301040-21305260	1760
TCONS_00085365	Sense LncRNA	Chr04:23114076-23145797	675
TCONS_00085390	Sense LncRNA	Chr04:23494648-23507952	1003
TCONS_00085399	Sense LncRNA	Chr04:23639626-23734459	2646
TCONS_00085440	Sense LncRNA	Chr04:24178228-24181971	479
TCONS_00085695	Sense LncRNA	Chr04:1468306-1471295	1059
TCONS_00085703	Sense LncRNA	Chr04:2429798-2435391	995
TCONS_00085710	Sense LncRNA	Chr04:2606457-2615456	1320
TCONS_00085723	Sense LncRNA	Chr04:3165927-3168318	858
TCONS_00085738	Sense LncRNA	Chr04:4649015-4653539	921
TCONS_00085750	Sense LncRNA	Chr04:5653633-5674017	455
TCONS_00085766	Sense LncRNA	Chr04:6868619-6874497	1011
TCONS_00085767	Sense LncRNA	Chr04:6868619-6874497	299
TCONS_00085783	Sense LncRNA	Chr04:8579597-8585159	695
TCONS_00085785	Sense LncRNA	Chr04:8809315-8846663	3286
TCONS_00085787	Sense LncRNA	Chr04:9024014-9025702	414
TCONS_00085797	Sense LncRNA	Chr04:10982973-10989843	687
TCONS_00085804	Sense LncRNA	Chr04:14768397-14771269	358
TCONS_00085836	Sense LncRNA	Chr04:18652432-18662366	2143
TCONS_00085887	Sense LncRNA	Chr04:21813169-21819470	960
TCONS_00085888	Sense LncRNA	Chr04:21813169-21819470	976
TCONS_00085911	Sense LncRNA	Chr04:23639626-23734459	1167
TCONS_00085912	Sense LncRNA	Chr04:23639626-23734459	328
TCONS_00085923	Sense LncRNA	Chr04:23984321-23985803	374
TCONS_00085925	Sense LncRNA	Chr04:23992237-23995449	1320
TCONS_00085926	Sense LncRNA	Chr04:24003123-24008191	1527
TCONS_00085928	Sense LncRNA	Chr04:24003123-24008191	1407
TCONS_00085980	Sense LncRNA	Chr05:239200-272123	265
TCONS_00086116	Sense LncRNA	Chr05:1745156-1747452	1023
TCONS_00086557	Sense LncRNA	Chr05:6676227-6676718	374
TCONS_00086706	Sense LncRNA	Chr05:8722956-8725679	440
TCONS_00087868	Sense LncRNA	Chr05:1671787-1680919	2091
TCONS_00087926	Sense LncRNA	Chr05:2116496-2171029	235
TCONS_00087933	Sense LncRNA	Chr05:2249950-2388846	1598
TCONS_00087967	Sense LncRNA	Chr05:2249950-2388846	209
TCONS_00087989	Sense LncRNA	Chr05:2505532-2512289	539
TCONS_00088010	Sense LncRNA	Chr05:2563632-2639103	243
TCONS_00088025	Sense LncRNA	Chr05:2691752-2694992	1419
TCONS_00088056	Sense LncRNA	Chr05:3057030-3172726	441
TCONS_00088118	Sense LncRNA	Chr05:3589784-3593287	2447
TCONS_00088121	Sense LncRNA	Chr05:3611036-3631034	238
TCONS_00088122	Sense LncRNA	Chr05:3611036-3631034	309
TCONS_00088130	Sense LncRNA	Chr05:3635526-3641960	1884
TCONS_00088161	Sense LncRNA	Chr05:3933049-3937864	909
TCONS_00088162	Sense LncRNA	Chr05:3938514-3943510	1665
TCONS_00088195	Sense LncRNA	Chr05:4331066-4434640	3043
TCONS_00088212	Sense LncRNA	Chr05:4331066-4434640	550
TCONS_00088214	Sense LncRNA	Chr05:4331066-4434640	355
TCONS_00088228	Sense LncRNA	Chr05:4331066-4434640	300
TCONS_00088235	Sense LncRNA	Chr05:4624165-4630515	1289
TCONS_00088239	Sense LncRNA	Chr05:4689799-4696200	1045
TCONS_00088284	Sense LncRNA	Chr05:5072511-5081031	595
TCONS_00088383	Sense LncRNA	Chr05:5877429-5881759	704
TCONS_00088462	Sense LncRNA	Chr05:6850596-6853649	1618
TCONS_00088473	Sense LncRNA	Chr05:6963598-6969038	1502
TCONS_00088478	Sense LncRNA	Chr05:7034730-7048314	4355
TCONS_00088484	Sense LncRNA	Chr05:7140428-7150560	1590
TCONS_00088544	Sense LncRNA	Chr05:8067276-8069294	1102
TCONS_00088545	Sense LncRNA	Chr05:8067276-8069294	938
TCONS_00088551	Sense LncRNA	Chr05:8201568-8207593	1449
TCONS_00088552	Sense LncRNA	Chr05:8201568-8207593	1573
TCONS_00088553	Sense LncRNA	Chr05:8211426-8220657	597
TCONS_00088556	Sense LncRNA	Chr05:8250399-8257673	3238
TCONS_00088610	Sense LncRNA	Chr05:9039304-9043494	1663
TCONS_00088611	Sense LncRNA	Chr05:9039304-9043494	1654
TCONS_00088647	Sense LncRNA	Chr05:9434196-9437294	1331
TCONS_00088666	Sense LncRNA	Chr05:9605863-9608834	1311
TCONS_00088684	Sense LncRNA	Chr05:9709122-9714307	1534
TCONS_00088706	Sense LncRNA	Chr05:10172650-10192634	354
TCONS_00088707	Sense LncRNA	Chr05:10172650-10192634	673
TCONS_00088708	Sense LncRNA	Chr05:10172650-10192634	963
TCONS_00088780	Sense LncRNA	Chr05:10930158-10935982	1719
TCONS_00088783	Sense LncRNA	Chr05:11158872-11162430	811
TCONS_00088792	Sense LncRNA	Chr05:11370407-11374527	1554
TCONS_00088801	Sense LncRNA	Chr05:11496227-11502931	1167
TCONS_00088825	Sense LncRNA	Chr05:12040642-12042808	343
TCONS_00088865	Sense LncRNA	Chr05:13009671-13012729	478
TCONS_00088876	Sense LncRNA	Chr05:13059029-13070871	374
TCONS_00088895	Sense LncRNA	Chr05:14306407-14308725	1084
TCONS_00088915	Sense LncRNA	Chr05:14699478-14711641	989
TCONS_00088919	Sense LncRNA	Chr05:14820361-14826152	3519
TCONS_00088922	Sense LncRNA	Chr05:15349181-15357840	2401
TCONS_00088938	Sense LncRNA	Chr05:15944659-15945714	843
TCONS_00088958	Sense LncRNA	Chr05:16770491-16832369	639
TCONS_00088975	Sense LncRNA	Chr05:17374494-17377222	624
TCONS_00089042	Sense LncRNA	Chr05:19239458-19243621	425
TCONS_00089078	Sense LncRNA	Chr05:19826859-19832707	2264
TCONS_00089147	Sense LncRNA	Chr05:20761022-20771541	987
TCONS_00089151	Sense LncRNA	Chr05:20817849-20823699	668
TCONS_00089185	Sense LncRNA	Chr05:21371267-21378395	487
TCONS_00089242	Sense LncRNA	Chr05:21957164-21962235	819
TCONS_00089249	Sense LncRNA	Chr05:22065569-22069561	1111
TCONS_00089310	Sense LncRNA	Chr05:22711370-22713185	560
TCONS_00089440	Sense LncRNA	Chr05:24170544-24173957	666
TCONS_00089442	Sense LncRNA	Chr05:24183360-24191860	3231
TCONS_00089466	Sense LncRNA	Chr05:24557077-24561951	428
TCONS_00089472	Sense LncRNA	Chr05:24615047-24619296	1328
TCONS_00089487	Sense LncRNA	Chr05:24813781-24815750	1883
TCONS_00089508	Sense LncRNA	Chr05:24912200-24915351	506
TCONS_00089536	Sense LncRNA	Chr05:25134748-25139932	681
TCONS_00089553	Sense LncRNA	Chr05:25270772-25274957	1379
TCONS_00089563	Sense LncRNA	Chr05:25306618-25310511	1068
TCONS_00089602	Sense LncRNA	Chr05:25696116-25702880	1151
TCONS_00089623	Sense LncRNA	Chr05:25831524-25834609	1532
TCONS_00089641	Sense LncRNA	Chr05:25878181-25885244	1860
TCONS_00089764	Sense LncRNA	Chr05:2790278-2798593	310
TCONS_00089793	Sense LncRNA	Chr05:3057030-3172726	294
TCONS_00089983	Sense LncRNA	Chr05:8087927-8090766	686
TCONS_00090530	Sense LncRNA	Chr05:1807120-1809251	753
TCONS_00090531	Sense LncRNA	Chr05:1807120-1809251	784
TCONS_00090551	Sense LncRNA	Chr05:2226270-2233751	213
TCONS_00090591	Sense LncRNA	Chr05:3057030-3172726	620
TCONS_00090614	Sense LncRNA	Chr05:3589784-3593287	2459
TCONS_00090638	Sense LncRNA	Chr05:4154879-4168281	2117
TCONS_00090656	Sense LncRNA	Chr05:4331066-4434640	585
[truncated: 4,285 more rows]

## Sheet: Table S5
Table S5 6-Benzylaminopurine-responsive lncRNAs.
lncRNA_id	6-BA_FPKM	CK_FPKM	FC(6-BA/CK)	p-value	UP/DOWN regulate
TCONS_00004119	0.87869	10.6098	0.0828187	0.0349006	DOWN
TCONS_00005023	0.611588	10.4798	0.0583587	0.0349006	DOWN
TCONS_00005877	0.0135186	15.6843	0.000861919	0.00258241	DOWN
TCONS_00005935	1e-05	32.5804	3.07e-07	1.2e-06	DOWN
TCONS_00015001	0.0193916	13.0439	0.00148664	0.00716947	DOWN
TCONS_00016809	24.6342	69.2903	0.355522	0.00635637	DOWN
TCONS_00019325	1.13923	21.3589	0.0533375	0.00120313	DOWN
TCONS_00024493	115.872	235.488	0.492051	0.00754559	DOWN
TCONS_00024688	1.73215	22.8333	0.0758607	0.000714073	DOWN
TCONS_00025550	1e-05	49.4749	2.02e-07	2.69e-10	DOWN
TCONS_00025581	5.382	22.1377	0.243115	0.0370337	DOWN
TCONS_00027327	95.9865	280.576	0.342105	5.24e-09	DOWN
TCONS_00029545	32.5627	76.553	0.425362	0.0402919	DOWN
TCONS_00030932	2.78569	32.8099	0.0849039	4.65e-05	DOWN
TCONS_00035545	36.1522	131.656	0.274596	8.45e-07	DOWN
TCONS_00035647	0.00118913	12.368	9.61e-05	0.012082	DOWN
TCONS_00035676	1e-05	13.0078	7.69e-07	0.00716947	DOWN
TCONS_00036866	0.00532363	17.0943	0.000311427	0.00147641	DOWN
TCONS_00038318	33.8261	112.849	0.299747	2.14e-05	DOWN
TCONS_00047840	1.35006	13.8964	0.0971518	0.037426	DOWN
TCONS_00048724	2.29003	16.659	0.137465	0.0226348	DOWN
TCONS_00058751	9.17315	33.0135	0.277861	0.0206076	DOWN
TCONS_00060822	4.05871	22.2374	0.182517	0.01933	DOWN
TCONS_00062238	2.15291	21.7068	0.0991814	0.00360554	DOWN
TCONS_00063074	9.12806	35.9688	0.253777	0.0149903	DOWN
TCONS_00066244	16.2095	63.0848	0.256948	0.000383303	DOWN
TCONS_00069940	1e-05	17.8079	5.62e-07	0.00147641	DOWN
TCONS_00072641	1e-05	18.105	5.52e-07	0.000846244	DOWN
TCONS_00072690	9.57301	34.4994	0.277483	0.0148109	DOWN
TCONS_00074166	2.57849	20.9926	0.122829	0.00573949	DOWN
TCONS_00074236	1.80167	52.9741	0.0340104	7.06e-10	DOWN
TCONS_00076351	1e-05	13.4392	7.44e-07	0.00716947	DOWN
TCONS_00076949	1e-05	11.1706	8.95e-07	0.0204916	DOWN
TCONS_00077064	1e-05	14.7749	6.77e-07	0.00428639	DOWN
TCONS_00081042	21.2028	65.8908	0.321787	0.004397	DOWN
TCONS_00081649	1e-05	42.8007	2.34e-07	7.75e-09	DOWN
TCONS_00081950	1e-05	17.3311	5.77e-07	0.00147641	DOWN
TCONS_00082217	1e-05	17.3199	5.77e-07	0.00147641	DOWN
TCONS_00088010	0.584768	11.5631	0.0505719	0.0204916	DOWN
TCONS_00089983	0.656008	12.1104	0.054169	0.012082	DOWN
TCONS_00092211	8.97696	41.7488	0.215023	0.000873402	DOWN
TCONS_00094680	1e-05	10.9163	9.16e-07	0.0349006	DOWN
TCONS_00095697	1.24322	15.6729	0.0793229	0.0140198	DOWN
TCONS_00099340	0.497958	10.1261	0.0491757	0.0349006	DOWN
TCONS_00101025	0.60791	15.7982	0.0384797	0.00258241	DOWN
TCONS_00101838	11.4505	36.7172	0.311857	0.0285771	DOWN
TCONS_00102031	0.725611	17.1891	0.0422134	0.00147641	DOWN
TCONS_00102308	1e-05	87.8718	1.14e-07	2.2e-18	DOWN
TCONS_00104917	1e-05	10.016	9.98e-07	0.0349006	DOWN
TCONS_00105020	41.5299	124.392	0.333863	7.06e-05	DOWN
TCONS_00109025	1.46284	20.6592	0.0708082	0.00203742	DOWN
TCONS_00112926	1e-05	19.3166	5.18e-07	0.00048946	DOWN
TCONS_00113045	8.88179	48.07	0.184768	7.74e-05	DOWN
TCONS_00115695	1e-05	14.1124	7.09e-07	0.00428639	DOWN
TCONS_00121192	2.78555	21.3824	0.130273	0.00360554	DOWN
TCONS_00121970	0.00573057	35.6347	0.000160814	2.22e-07	DOWN
TCONS_00125396	1e-05	19.742	5.07e-07	0.00048946	DOWN
TCONS_00126956	12.9097	118.374	0.109059	1.7e-14	DOWN
TCONS_00127814	1e-05	11.457	8.73e-07	0.0204916	DOWN
TCONS_00139098	1e-05	16.5341	6.05e-07	0.0025957	DOWN
TCONS_00145275	86.9055	259.922	0.334352	8.61e-09	DOWN
TCONS_00153206	1.522	25.9023	0.0587593	0.000155542	DOWN
TCONS_00155111	1e-05	12.54	7.97e-07	0.012082	DOWN
TCONS_00157674	3.35102	26.9973	0.124124	0.00152702	DOWN
TCONS_00158070	4.94326	19.8786	0.248672	0.0428873	DOWN
TCONS_00158684	8.80673	39.287	0.224164	0.00189475	DOWN
TCONS_00162171	35.084	91.001	0.385534	0.00658324	DOWN
TCONS_00162859	9.89e-05	16.3418	6.05e-06	0.0025957	DOWN
TCONS_00162863	1.51596	22.6359	0.0669715	0.000714073	DOWN
TCONS_00166087	1e-05	12.377	8.08e-07	0.012082	DOWN
TCONS_00166540	14.2354	45.2622	0.31451	0.0178063	DOWN
TCONS_00167152	0.000716829	10.9411	6.55e-05	0.0349006	DOWN
TCONS_00167674	8.99501	32.678	0.275262	0.0170781	DOWN
TCONS_00169696	1e-05	12.7154	7.86e-07	0.012082	DOWN
TCONS_00170092	44.5586	110.61	0.402844	0.00523992	DOWN
TCONS_00171016	1e-05	26.3403	3.8e-07	1.85e-05	DOWN
TCONS_00174143	0.408388	11.3481	0.0359873	0.0204916	DOWN
TCONS_00177898	1e-05	19.8462	5.04e-07	0.00048946	DOWN
TCONS_00180623	6.22774	24.5078	0.254113	0.0457634	DOWN
TCONS_00180925	1e-05	10.0592	9.94e-07	0.0349006	DOWN
TCONS_00180927	1e-05	10.0483	9.95e-07	0.0349006	DOWN
TCONS_00181745	4.17988	38.5958	0.108299	4.23e-05	DOWN
TCONS_00182140	10.5326	32.0106	0.329035	0.0457737	DOWN
TCONS_00188789	1.40828	12.3761	0.11379	0.036777	DOWN
TCONS_00189011	2.68744	19.4251	0.138349	0.00915489	DOWN
TCONS_00189614	0.672832	12.7013	0.0529735	0.012082	DOWN
TCONS_00193391	1e-05	17.1584	5.83e-07	0.00147641	DOWN
TCONS_00193817	4.0573	38.4614	0.10549	4.23e-05	DOWN
TCONS_00193919	10.7636	163.324	0.0659034	4.15e-24	DOWN
TCONS_00195722	10.1523	239.409	0.0424057	3.08e-39	DOWN
TCONS_00197673	3.9877	20.7356	0.192312	0.01393	DOWN
TCONS_00199136	20.3548	63.3819	0.321145	0.00384518	DOWN
TCONS_00207044	4.86362	56.9187	0.0854485	2.84e-08	DOWN
TCONS_00207481	29.7154	85.9624	0.345679	0.00225119	DOWN
TCONS_00208263	18.2374	98.4163	0.185309	2.72e-08	DOWN
TCONS_00209794	35.4564	178.25	0.198914	3.72e-13	DOWN
TCONS_00214148	2.69876	20.5589	0.13127	0.00573949	DOWN
TCONS_00214244	0.326409	525.877	0.000620695	5.96e-115	DOWN
TCONS_00215022	12.7485	38.2603	0.333204	0.0328353	DOWN
TCONS_00218579	2.03422	18.8788	0.107752	0.0146057	DOWN
TCONS_00220619	1e-05	31.1516	3.21e-07	2.17e-06	DOWN
TCONS_00221468	1.76409	13.7198	0.12858	0.037426	DOWN
TCONS_00221527	1e-05	14.9384	6.69e-07	0.00428639	DOWN
TCONS_00228075	1.3671	14.8489	0.0920674	0.0229252	DOWN
TCONS_00232466	6.34002	36.088	0.175682	0.000984635	DOWN
TCONS_00232952	1e-05	13.2015	7.57e-07	0.00716947	DOWN
TCONS_00233101	1e-05	14.1356	7.07e-07	0.00428639	DOWN
TCONS_00233775	42.8214	209.171	0.20472	5.64e-15	DOWN
TCONS_00234575	1e-05	10.5669	9.46e-07	0.0349006	DOWN
TCONS_00237713	12.0489	37.9124	0.317809	0.0442195	DOWN
TCONS_00238269	14.9422	55.0444	0.271457	0.000976773	DOWN
TCONS_00238926	1e-05	12.4339	8.04e-07	0.012082	DOWN
TCONS_00239297	1e-05	10.9676	9.12e-07	0.0349006	DOWN
TCONS_00239355	1e-05	23.1748	4.32e-07	0.000103309	DOWN
TCONS_00239361	1e-05	44.6134	2.24e-07	2.6e-09	DOWN
TCONS_00249064	5.42975	22.5655	0.240622	0.0370337	DOWN
TCONS_00249461	0.141098	11.3741	0.0124052	0.0204916	DOWN
TCONS_00252526	19.8343	56.3046	0.352268	0.0140242	DOWN
TCONS_00256165	6.41737	32.7576	0.195905	0.00330457	DOWN
TCONS_00258591	46.0766	105.783	0.435577	0.0206707	DOWN
TCONS_00258858	1e-05	101.807	9.82e-08	1.34e-21	DOWN
TCONS_00259011	16.2631	1532.51	0.0106121	0	DOWN
TCONS_00259094	11.5874	35.951	0.322311	0.0386517	DOWN
TCONS_00259530	0.779694	17.4351	0.0447198	0.00147641	DOWN
TCONS_00259531	1.16339	17.7597	0.0655073	0.0052735	DOWN
TCONS_00259903	3.50665	54.833	0.0639515	1.18e-08	DOWN
TCONS_00267712	1.69769	13.5224	0.125547	0.037426	DOWN
TCONS_00269116	46.6157	197.342	0.236218	5.05e-12	DOWN
TCONS_00270086	12.6888	53.8922	0.235448	0.000423734	DOWN
TCONS_00270096	47.9191	1481.07	0.0323544	1.96e-258	DOWN
TCONS_00270491	0.00127531	12.3855	0.000102968	0.012082	DOWN
TCONS_00270950	126.41	539.11	0.234479	8.08e-31	DOWN
TCONS_00270951	193.799	422.979	0.458176	1.44e-05	DOWN
TCONS_00274535	50.6869	110.544	0.458522	0.0300735	DOWN
TCONS_00274867	6.46341	36.0664	0.179209	0.000984635	DOWN
TCONS_00276723	7.33411	27.4865	0.266826	0.0395579	DOWN
TCONS_00278414	5.97	32.2183	0.185298	0.0015428	DOWN
TCONS_00278649	1e-05	34.7747	2.88e-07	3.85e-07	DOWN
TCONS_00279029	1e-05	13.7748	7.26e-07	0.00716947	DOWN
TCONS_00280469	17.631	50.1569	0.351517	0.0193444	DOWN
TCONS_00283250	2.64808	15.0869	0.175522	0.034741	DOWN
TCONS_00284607	0.00824072	23.2141	0.000354988	0.000103309	DOWN
TCONS_00286169	1e-05	17.6648	5.66e-07	0.00147641	DOWN
TCONS_00288379	1.08794	12.1312	0.0896812	0.036777	DOWN
TCONS_00289937	1.3595	14.4176	0.0942945	0.0229252	DOWN
TCONS_00290115	39.2637	94.8851	0.413803	0.017239	DOWN
TCONS_00004003	4.51647	0.000832752	5423.55	0.0404152	UP
TCONS_00014841	6.60048	0.649032	10.1697	0.00835668	UP
TCONS_00015256	191.636	50.2078	3.81686	2.36e-35	UP
TCONS_00017189	12.9252	4.79343	2.69644	0.00693855	UP
TCONS_00019354	8.78534	2.54299	3.45473	0.0171629	UP
TCONS_00024270	11.4929	1e-05	1149290	0.000132905	UP
TCONS_00024528	5.19094	1e-05	519094	0.0185362	UP
TCONS_00027201	9.72977	3.11526	3.12326	0.0253897	UP
TCONS_00039014	4.32322	1e-05	432322	0.0404152	UP
TCONS_00040351	17.0536	8.03872	2.12143	0.00555137	UP
TCONS_00041683	7.76696	0.885482	8.77145	0.00371719	UP
TCONS_00042620	16.7749	1.35783	12.3542	1.09e-05	UP
TCONS_00047562	4.57126	0.119523	38.2459	0.0404152	UP
TCONS_00050741	9.20446	3.96917	2.31899	0.0253897	UP
TCONS_00052399	4.38541	1e-05	438541	0.0404152	UP
TCONS_00053247	5.17081	1e-05	517081	0.0185362	UP
TCONS_00056530	13.9069	6.16453	2.25595	0.0143802	UP
TCONS_00059636	7.20693	1e-05	720693	0.00371719	UP
TCONS_00064030	4.04182	0.994709	4.06332	0.0404152	UP
TCONS_00067244	4.1333	1e-05	413330	0.0404152	UP
TCONS_00067502	15.8929	3.51466	4.52189	0.000342165	UP
TCONS_00080869	6.90954	0.149565	46.1976	0.00835668	UP
TCONS_00081182	4.39105	1e-05	439105	0.0404152	UP
TCONS_00083494	16.3768	7.55282	2.1683	0.00661827	UP
TCONS_00094526	12.087	1e-05	1208700	5.69e-05	UP
TCONS_00094791	8.35958	0.000402979	20744.5	0.00163574	UP
TCONS_00102261	6.72596	1e-05	672596	0.00835668	UP
TCONS_00107215	6.08152	1.848	3.29087	0.0348499	UP
TCONS_00107503	7.84855	1.40354	5.59197	0.0182078	UP
TCONS_00108911	5.54393	0.979802	5.65821	0.0185362	UP
TCONS_00110723	26.856	7.98518	3.36323	1.34e-05	UP
TCONS_00115745	5.89058	0.588382	10.0115	0.0185362	UP
TCONS_00116793	4.01997	0.00315791	1272.98	0.0404152	UP
TCONS_00118098	4.13749	0.00141722	2919.44	0.0404152	UP
TCONS_00118478	11.9887	5.25906	2.27963	0.0282065	UP
TCONS_00121968	9.64889	1e-05	964889	0.000713462	UP
TCONS_00122201	26.2236	3.17884	8.24942	7.5e-08	UP
TCONS_00122760	24.2983	1e-05	2429830	1.67e-09	UP
TCONS_00122830	21.8742	7.28474	3.00274	0.000260611	UP
TCONS_00128527	7.06608	1e-05	706608	0.00371719	UP
TCONS_00131034	36.2436	5.20014	6.96974	8.52e-10	UP
TCONS_00131714	19.1257	9.48024	2.01743	0.00430541	UP
TCONS_00134676	5.68062	1e-05	568062	0.0185362	UP
TCONS_00138144	11.669	3.1204	3.73958	0.00813407	UP
TCONS_00138620	4.72861	0.741306	6.37876	0.0404152	UP
TCONS_00141763	9.39121	0.000651538	14413.9	0.000713462	UP
TCONS_00142166	16.8935	4.52523	3.73318	0.000623332	UP
TCONS_00151061	6.26609	0.774327	8.0923	0.00835668	UP
TCONS_00153061	12.6224	3.86772	3.26352	0.00458885	UP
TCONS_00153627	24.55	6.09838	4.02566	1.39e-05	UP
TCONS_00153628	21.4784	1e-05	2147840	2.34e-08	UP
TCONS_00156440	4.40295	1e-05	440295	0.0404152	UP
TCONS_00160192	24.6279	10.3691	2.37512	0.000470258	UP
TCONS_00163367	18.8266	4.1303	4.55817	0.000186886	UP
TCONS_00167662	11.6208	2.94797	3.94197	0.00235293	UP
TCONS_00174431	7.44671	0.0020687	3599.71	0.00371719	UP
TCONS_00175557	5.45443	0.935731	5.82906	0.0185362	UP
TCONS_00178341	21.3469	1e-05	2134690	2.34e-08	UP
TCONS_00179004	7.0103	1e-05	701030	0.00371719	UP
TCONS_00182325	7.03116	2.67855	2.62499	0.0324343	UP
TCONS_00184256	4.91916	1e-05	491916	0.0404152	UP
TCONS_00186688	7.9987	2.54293	3.14547	0.0324343	UP
TCONS_00187699	21.4655	8.18719	2.62184	0.000668988	UP
TCONS_00190890	4.3241	0.0365068	118.446	0.0404152	UP
TCONS_00193716	15.1816	0.0659323	230.26	4.34e-06	UP
TCONS_00194224	9.98339	3.0113	3.31531	0.0253897	UP
TCONS_00194249	11.0066	1.22019	9.0204	0.000589081	UP
TCONS_00195665	11.2973	0.861176	13.1185	0.000132905	UP
TCONS_00202884	4.48746	0.184779	24.2856	0.0404152	UP
TCONS_00203914	10.3292	0.956863	10.7949	0.0003089	UP
TCONS_00203988	5.11041	0.00050741	10071.6	0.0185362	UP
TCONS_00206867	9.68878	3.57953	2.70672	0.0253897	UP
TCONS_00207459	8.18985	1e-05	818985	0.00163574	UP
TCONS_00211085	128.524	1e-05	12852400	2.22e-50	UP
TCONS_00212636	16.1182	1e-05	1611820	1.83e-06	UP
TCONS_00214992	15.4998	1.67547	9.25102	2.45e-05	UP
TCONS_00214993	8.75016	0.000687808	12721.8	0.00163574	UP
TCONS_00216216	4.39182	0.0397577	110.465	0.0404152	UP
TCONS_00231259	8.97743	1e-05	897743	0.00163574	UP
TCONS_00233059	22.6517	11.2216	2.01858	0.00277609	UP
TCONS_00233941	8.00107	3.099	2.58182	0.0443277	UP
TCONS_00237621	6.847	1.95901	3.49513	0.0348499	UP
TCONS_00239816	4.24258	1e-05	424258	0.0404152	UP
TCONS_00240011	7.45022	2.66741	2.79305	0.0324343	UP
TCONS_00244581	7.33798	2.81734	2.60458	0.0324343	UP
TCONS_00244753	7.56984	1e-05	756984	0.00371719	UP
TCONS_00248482	5.6536	1e-05	565360	0.0185362	UP
TCONS_00254530	9.16439	3.83077	2.39231	0.0253897	UP
TCONS_00256259	5.94353	1e-05	594353	0.0185362	UP
TCONS_00257365	5.22839	1e-05	522839	0.0185362	UP
TCONS_00259582	9.40484	1e-05	940484	0.000713462	UP
TCONS_00259832	83.9234	1e-05	8392340	1.43e-32	UP
TCONS_00259900	16.7145	1.77651	9.40862	1.09e-05	UP
TCONS_00259921	80.4133	38.7356	2.07595	1.58e-09	UP
TCONS_00263312	4.62492	0.00139539	3314.43	0.0404152	UP
TCONS_00267832	6.82178	1e-05	682178	0.00835668	UP
TCONS_00270894	11.4824	1.45987	7.86536	0.000589081	UP
TCONS_00272052	11.5925	0.778098	14.8985	0.000132905	UP
TCONS_00273629	55.3027	23.5242	2.35089	6.29e-08	UP
TCONS_00273728	29.2387	9.52226	3.07056	1.16e-05	UP
TCONS_00274572	5.44146	0.495283	10.9866	0.0185362	UP
TCONS_00275851	27.4656	7.96712	3.44737	7.48e-06	UP
TCONS_00276447	6.85962	1e-05	685962	0.00835668	UP
TCONS_00278183	4.70179	0.356215	13.1993	0.0404152	UP
TCONS_00278573	53.0182	23.6022	2.24632	1.82e-07	UP
TCONS_00278635	13.0285	4.75112	2.7422	0.00382669	UP
TCONS_00279240	28.3049	0.028049	1009.12	4.85e-11	UP
TCONS_00279271	15.2399	4.34012	3.5114	0.00114346	UP
TCONS_00280380	6.23153	0.98949	6.29772	0.00835668	UP
TCONS_00280395	11.6005	1e-05	1160050	0.000132905	UP
TCONS_00281422	7.00678	2.68592	2.60871	0.0324343	UP
TCONS_00283371	77.4371	4.81042	16.0978	1.66e-25	UP
TCONS_00283630	4.878	1e-05	487800	0.0404152	UP
TCONS_00285616	6.16375	1e-05	616375	0.00835668	UP
TCONS_00286673	8.84119	1e-05	884119	0.00163574	UP
TCONS_00287827	11.3218	1e-05	1132180	0.000132905	UP

## Sheet: Table S6
Table S6 Summary of P. tomentosa small RNA-seq data.
Sample	Row Reads	Effective Reads	Effective Ratio
CK-1	126040127	1.24763e+08	0.9899
CK-2	126294562	1.24994e+08	0.9897
CK-3	126548454	125295624	0.9901
6-BA-1	77977630	75963895	0.9791
6-BA-2	78956213	76823539	0.9656
6-BA-3	78459615	77683183	0.9901

## Sheet: Table S7
Table S7 Summary of P. tomentosa 24-nt siRNA data.
	Average unique tags	Average total tags	Average clusters	Average expressed clusters
CK	7494036	124880203	76690	32836
6-BA	6545777	68323393	76072	33101

## Sheet: Table S8
Table S8 6-Benzylaminopurine-responsive 24-nt siRNA clusters.
Locus	Locus	Fold change	Up / Down	Transposon	Annotation	6-BA_RPM	CK_RPM
cluster1	Chr1:4222-4973	2.22	Down	T	Potri.001G000200	220.73	489.33
cluster2	Chr1:5409-6477	2.33	Down	F	Potri.001G000200	109.18	254.39
cluster92	Chr1:802247-802667	3.99	Down	T	Potri.001G012100	34.69	138.3
cluster108	Chr1:960442-961702	347.49	Down	F	Potri.001G014000	0.39	135.52
cluster135	Chr1:1077622-1077893	2.84	Down	T	Potri.001G015300	41.78	118.86
cluster144	Chr1:1122604-1122975	2.17	Down	T	Potri.001G015600	59.12	128.3
cluster184	Chr1:1371006-1371740	2.17	Down	T	Potri.001G018800	38.63	83.87
cluster232	Chr1:1776386-1776698	2.01	Down	T	Potri.001G023400	89.87	180.51
cluster298	Chr1:2399684-2400131	2.52	Down	T	Potri.001G032600	44.15	111.09
cluster319	Chr1:2703704-2704969	2.52	Down	T	Potri.001G038300	338.58	853.13
cluster356	Chr1:2868243-2869737	2.36	Down	T	Potri.001G039700	57.55	136.08
cluster366	Chr1:2970720-2971179	3.15	Down	T	Potri.001G040800	33.5	105.53
cluster370	Chr1:2981388-2982284	2.91	Down	T	Potri.001G041000	18.92	54.99
cluster503	Chr1:3763926-3765735	2.27	Down	T	Potri.001G049500	34.29	77.76
cluster520	Chr1:3844085-3846628	2.44	Down	F	Potri.001G050300	19.31	47.21
cluster562	Chr1:4281231-4281551	2.08	Down	T	Potri.001G056700	221.91	462.11
cluster582	Chr1:4423422-4423906	3.31	Down	T	Potri.001G058200	37.05	122.75
cluster603	Chr1:4571985-4575274	2.28	Down	T	Potri.001G059600	132.04	301.6
cluster663	Chr1:4987857-4988524	2.77	Down	F	Potri.001G063300	10.64	29.44
cluster673	Chr1:5048905-5049199	2.73	Down	F	Potri.001G064100	11.82	32.21
cluster682	Chr1:5086368-5086811	2.72	Down	F	Potri.001G064600	11.43	31.1
cluster697	Chr1:5177620-5179225	2.67	Down	T	Potri.001G065500	722.89	1927.33
cluster902	Chr1:6841273-6841974	3.07	Down	T	Potri.001G086500	46.12	141.63
cluster910	Chr1:6884806-6890219	2.49	Down	F	Potri.001G087000	143.47	357.69
cluster1003	Chr1:7740242-7740394	2.57	Down	T	Potri.001G098300	338.58	871.46
cluster1120	Chr1:8606004-8606226	2.82	Down	T	Potri.001G108400	136.38	384.91
cluster1176	Chr1:9139026-9139201	3.19	Down	F	Potri.001G114200	41.39	132.19
cluster1197	Chr1:9307347-9312352	2.14	Down	T	Potri.001G116100	228.61	489.89
cluster1319	Chr1:10276481-10278046	2.59	Down	T	Potri.001G126600	283.4	733.72
cluster1324	Chr1:10285423-10285700	2.04	Down	T	Potri.001G126700	59.91	122.19
cluster1347	Chr1:10520590-10521241	2.43	Down	T	Potri.001G130300	15.77	38.32
cluster1357	Chr1:10592405-10593262	2.33	Down	T	Potri.001G131500	37.84	88.31
cluster1430	Chr1:11335617-11335977	2.79	Down	F	Potri.001G140900	44.93	125.53
cluster1460	Chr1:11634748-11635461	2.54	Down	T	Potri.001G143000	50.85	129.41
cluster1628	Chr1:12848818-12849631	2.3	Down	T	Potri.001G155400	330.3	759.27
cluster1696	Chr1:13364425-13364787	3.1	Down	T	Potri.001G160400	220.33	682.62
cluster1704	Chr1:13479894-13480803	2.37	Down	T	Potri.001G161500	118.64	281.05
cluster1711	Chr1:13501870-13502291	2.01	Down	T	Potri.001G161600	111.94	225.5
cluster1737	Chr1:13673158-13673358	2.11	Down	T	Potri.001G163500	38.63	81.65
cluster1765	Chr1:13844295-13845178	2.66	Down	T	Potri.001G165100	372.48	990.88
cluster1901	Chr1:14813761-14814890	2.35	Down	T	Potri.001G174800	97.36	228.84
cluster1943	Chr1:15021756-15022423	2.04	Down	T	Potri.001G176400	133.23	272.16
cluster2145	Chr1:16163741-16165167	2.21	Down	F	Potri.001G184500	41.39	91.65
cluster2160	Chr1:16255733-16257960	2.28	Down	T	Potri.001G185500	97.36	221.61
cluster2161	Chr1:16258083-16260680	2.08	Down	T	Potri.001G185500	125.74	261.61
cluster2216	Chr1:16620658-16621724	2.63	Down	T	Potri.001G188200	37.45	98.31
cluster2332	Chr1:17475510-17475793	3.76	Down	T	Potri.001G192000	8.28	31.1
cluster2569	Chr1:19201010-19207112	2.59	Down	T	Potri.001G198500	1633.79	4225.13
cluster2586	Chr1:19377408-19377688	2.43	Down	T	Potri.001G199600	51.63	125.53
cluster2629	Chr1:19679824-19681084	2.31	Down	F	Potri.001G200900	94.6	218.28
cluster2633	Chr1:19749815-19750478	2.67	Down	T	Potri.001G201500	43.75	116.64
cluster2669	Chr1:19955074-19956499	4.16	Down	T	Potri.001G203000	7.88	32.77
cluster2731	Chr1:20229846-20230697	2.31	Down	T	Potri.001G204000	31.93	73.87
cluster2894	Chr1:21549652-21551149	2.16	Down	T	Potri.001G213100	23.65	51.1
cluster2908	Chr1:21613959-21614841	2.68	Down	T	Potri.001G213400	55.58	148.85
cluster2919	Chr1:21698644-21699682	5.48	Down	F	Potri.001G214100	3.55	19.44
cluster2920	Chr1:21704368-21704856	3.42	Down	F	Potri.001G214200	13.8	47.21
cluster2989	Chr1:22315364-22315602	3.17	Down	T	Potri.001G217400	34.69	109.97
cluster3202	Chr1:23423990-23424292	2.14	Down	T	Potri.001G224000	108	231.06
cluster3426	Chr1:24641514-24641652	3.59	Down	T	Potri.001G234400	213.24	764.82
cluster3520	Chr1:25128694-25128991	2.97	Down	F	Potri.001G240300	106.82	317.7
cluster3570	Chr1:25390759-25390934	2.29	Down	T	Potri.001G242700	56.76	129.97
cluster3571	Chr1:25398530-25398779	2.44	Down	T	Potri.001G243000	18.92	46.1
cluster3621	Chr1:25667712-25668655	2.15	Down	T	Potri.001G246100	42.17	90.53
cluster3636	Chr1:25805099-25805797	2.11	Down	T	Potri.001G248300	27.59	58.32
cluster3689	Chr1:26150832-26152232	2.34	Down	T	Potri.001G251800	19.71	46.1
cluster3697	Chr1:26188155-26188380	2.86	Down	T	Potri.001G252200	690.17	1977.32
cluster3721	Chr1:26370826-26371446	3.22	Down	T	Potri.001G253900	11.04	35.55
cluster3743	Chr1:26588117-26588351	2.69	Down	F	Potri.001G256300	22.47	60.54
cluster3816	Chr1:27129696-27130322	2.36	Down	T	Potri.001G262200	242.01	570.42
cluster3934	Chr1:27919647-27920526	2.45	Down	T	Potri.001G271700	120.22	294.93
cluster3940	Chr1:27979313-27980340	2.49	Down	T	Potri.001G272700	108.39	269.94
cluster3994	Chr1:28428697-28429040	2.67	Down	T	Potri.001G278200	90.66	242.17
cluster4107	Chr1:29078263-29079506	2.14	Down	T	Potri.001G284200	92.63	198.29
cluster4118	Chr1:29144551-29145948	2.23	Down	T	Potri.001G284900	35.87	79.98
cluster4138	Chr1:29305399-29305869	4.23	Down	F	Potri.001G286900	21.28	89.98
cluster4232	Chr1:29935920-29936978	2.77	Down	T	Potri.001G294500	62.67	173.85
cluster4246	Chr1:30056917-30057432	2.83	Down	T	Potri.001G296000	146.23	413.79
cluster4304	Chr1:30432794-30433029	3.14	Down	T	Potri.001G300000	70.16	220.5
cluster4321	Chr1:30590901-30591039	2.01	Down	T	Potri.001G302100	68.19	137.19
cluster4337	Chr1:30681922-30682172	2.09	Down	T	Potri.001G303400	104.45	218.28
cluster4338	Chr1:30682546-30683093	2.49	Down	T	Potri.001G303400	44.15	109.97
cluster4409	Chr1:31019033-31019230	2.07	Down	T	Potri.001G307300	52.03	107.75
cluster4437	Chr1:31166713-31168108	2.4	Down	T	Potri.001G308300	229.4	551.54
cluster4577	Chr1:31923610-31923974	2.93	Down	T	Potri.001G313400	54.79	160.52
cluster4675	Chr1:32727994-32728394	4.14	Down	F	Potri.001G323100	128.89	533.76
cluster4682	Chr1:32831397-32832612	2.63	Down	T	Potri.001G324400	517.14	1358.02
cluster4707	Chr1:33062549-33063182	2.07	Down	T	Potri.001G326600	424.51	877.57
cluster4730	Chr1:33196629-33197158	2.59	Down	T	Potri.001G327800	107.61	278.82
cluster4765	Chr1:33428119-33428856	3.98	Down	T	Potri.001G330700	18.13	72.21
cluster4865	Chr1:34302685-34304562	2.34	Down	T	Potri.001G339300	121.79	284.93
cluster4977	Chr1:35089611-35089973	2.9	Down	T	Potri.001G345300	63.07	182.74
cluster5007	Chr1:35421681-35421853	2.31	Down	T	Potri.001G348300	46.9	108.31
cluster5016	Chr1:35510918-35511052	2.74	Down	F	Potri.001G348900	14.58	39.99
cluster5100	Chr1:36190931-36194378	2.39	Down	T	Potri.001G354200	3387.79	8091.45
cluster5136	Chr1:36628047-36629739	2.15	Down	T	Potri.001G357400	77.26	166.07
cluster5137	Chr1:36630099-36630638	2.69	Down	T	Potri.001G357400	22.47	60.54
cluster5138	Chr1:36633227-36633684	2.07	Down	T	Potri.001G357500	114.31	236.61
cluster5143	Chr1:36713941-36714103	3.41	Down	T	Potri.001G357800	41.39	141.08
cluster5162	Chr1:36941983-36942781	2.58	Down	T	Potri.001G359200	218.36	564.31
cluster5169	Chr1:37010787-37011938	2.87	Down	T	Potri.001G359800	11.04	31.66
cluster5211	Chr1:37435131-37436423	2.4	Down	T	Potri.001G362100	70.95	169.96
cluster5235	Chr1:37636045-37637562	2.21	Down	T	Potri.001G363600	135.98	300.49
cluster5415	Chr1:39004682-39005010	2.62	Down	T	Potri.001G375300	68.58	179.4
cluster5424	Chr1:39038657-39039022	2.25	Down	T	Potri.001G375500	35.47	79.98
cluster5488	Chr1:39560622-39560996	2.36	Down	T	Potri.001G379400	193.14	456.56
cluster5551	Chr1:40074548-40074663	2.89	Down	F	Potri.001G385500	178.16	514.88
cluster5618	Chr1:40447241-40448144	2.03	Down	T	Potri.001G388100	132.44	268.27
cluster5739	Chr1:41040182-41041670	2.24	Down	T	Potri.001G391500	122.98	275.49
cluster5742	Chr1:41049942-41051513	2.46	Down	T	Potri.001G391700	136.38	335.48
cluster5902	Chr1:41958311-41959063	3.17	Down	T	Potri.001G398800	20.5	64.98
cluster6129	Chr1:43348278-43349069	2.82	Down	T	Potri.001G410000	10.64	29.99
cluster6173	Chr1:43561418-43561610	2.33	Down	T	Potri.001G411000	81.2	188.84
cluster6203	Chr1:43726270-43728200	2.99	Down	T	Potri.001G412500	590.84	1766.25
cluster6280	Chr1:44337979-44338144	2.46	Down	F	Potri.001G418500	15.37	37.77
cluster6304	Chr1:44521971-44522366	2.27	Down	T	Potri.001G420000	80.8	183.29
cluster6347	Chr1:44799153-44799743	2.97	Down	T	Potri.001G422800	120.22	357.14
cluster6367	Chr1:45020595-45021241	3.4	Down	T	Potri.001G425300	9.46	32.21
cluster6478	Chr1:45473658-45473778	2.58	Down	T	Potri.001G427100	200.23	517.1
cluster6480	Chr1:45499846-45500872	2.4	Down	T	Potri.001G427300	501.76	1204.16
cluster6496	Chr1:45551110-45555403	2.04	Down	T	Potri.001G427500	3200.17	6531.81
cluster6552	Chr1:45774145-45774783	3.95	Down	F	Potri.001G428400	25.62	101.09
cluster6669	Chr1:46399743-46400148	2.61	Down	F	Potri.001G433100	16.16	42.21
cluster6689	Chr1:46527966-46528344	2.15	Down	F	Potri.001G434300	68.58	147.19
cluster6764	Chr1:47023529-47023780	2.76	Down	T	Potri.001G438700	69.37	191.62
cluster6780	Chr1:47139861-47140323	2.33	Down	T	Potri.001G439800	22.86	53.32
cluster6802	Chr1:47339840-47340085	2.54	Down	T	Potri.001G442000	169.09	429.34
cluster6812	Chr1:47420897-47421059	2.27	Down	T	Potri.001G443100	74.5	168.85
cluster7003	Chr1:48602079-48602660	2.28	Down	T	Potri.001G451700	22.86	52.21
cluster7010	Chr1:48628653-48629156	2.23	Down	T	Potri.001G451800	19.71	43.88
cluster7094	Chr1:49134779-49135056	4.11	Down	F	Potri.001G457100	4.73	19.44
cluster7196	Chr1:49659224-49659624	2.34	Down	T	Potri.001G462500	31.14	72.76
cluster7219	Chr1:49778843-49779640	2.13	Down	T	Potri.001G463500	134.41	286.04
cluster29580	Chr2:179975-180284	2.52	Down	T	Potri.002G002900	59.12	148.85
cluster29597	Chr2:359027-359250	3.12	Down	F	Potri.002G006500	40.99	127.75
cluster29617	Chr2:568346-569111	2.44	Down	T	Potri.002G009800	115.88	283.27
cluster29796	Chr2:2278737-2279537	2.55	Down	F	Potri.002G035500	1015.75	2592.17
cluster30000	Chr2:4302955-4303250	2.16	Down	T	Potri.002G063900	101.69	219.95
cluster30007	Chr2:4351867-4352023	2.28	Down	F	Potri.002G064600	33.11	75.54
cluster30207	Chr2:6301970-6302300	3.35	Down	T	Potri.002G088600	11.43	38.32
cluster30238	Chr2:6661957-6662427	2.11	Down	T	Potri.002G093000	96.96	204.4
cluster30330	Chr2:7345157-7345316	2.54	Down	T	Potri.002G101700	72.13	183.29
cluster30436	Chr2:8424727-8424852	3.13	Down	T	Potri.002G113000	126.92	397.13
cluster30457	Chr2:8585058-8585646	4.45	Down	T	Potri.002G114400	9.85	43.88
cluster30471	Chr2:8657523-8657876	2.39	Down	T	Potri.002G114900	100.9	241.61
cluster30484	Chr2:8744618-8745743	2.35	Down	T	Potri.002G116700	20.1	47.21
cluster30486	Chr2:8776974-8777108	2.93	Down	F	Potri.002G117400	14.98	43.88
cluster30487	Chr2:8783876-8784232	2.17	Down	T	Potri.002G117400	150.96	327.15
cluster30496	Chr2:8852863-8853470	2.64	Down	T	Potri.002G118300	188.01	495.44
cluster30579	Chr2:9410742-9412209	2.11	Down	T	Potri.002G125100	182.89	386.58
cluster30617	Chr2:9736591-9737034	2.26	Down	T	Potri.002G129800	36.66	82.76
cluster30631	Chr2:9919972-9920170	2.12	Down	T	Potri.002G133200	96.57	204.95
cluster30645	Chr2:9999251-9999566	2.57	Down	T	Potri.002G134100	13.4	34.44
cluster30658	Chr2:10110331-10111055	2.24	Down	T	Potri.002G135800	156.87	351.58
cluster30681	Chr2:10363562-10364082	3.54	Down	F	Potri.002G139800	42.96	152.19
cluster30683	Chr2:10368733-10369095	2.18	Down	T	Potri.002G139800	50.45	109.97
cluster30713	Chr2:10668369-10668499	2.88	Down	T	Potri.002G143400	58.34	168.29
cluster30750	Chr2:10944507-10944687	3.49	Down	T	Potri.002G147300	103.27	360.47
cluster30768	Chr2:11055950-11056315	2.64	Down	F	Potri.002G148900	242.01	638.18
cluster30984	Chr2:12619735-12620181	2.62	Down	F	Potri.002G167000	11.04	28.88
cluster31011	Chr2:12795551-12795788	2.38	Down	F	Potri.002G168900	86.71	206.06
cluster31030	Chr2:12946621-12948651	3.58	Down	T	Potri.002G170400	40.6	145.52
cluster31139	Chr2:13703538-13704959	2.2	Down	T	Potri.002G177800	126.13	277.71
cluster31154	Chr2:13782085-13783142	2.71	Down	T	Potri.002G178400	41.78	113.31
cluster31222	Chr2:14274667-14275362	2.53	Down	F	Potri.002G182400	105.63	267.72
cluster31246	Chr2:14468878-14469553	3.07	Down	T	Potri.002G185100	48.48	148.85
cluster31296	Chr2:14873212-14873497	2.5	Down	T	Potri.002G188900	118.64	297.15
cluster31297	Chr2:14874120-14874296	2.16	Down	T	Potri.002G188900	122.19	263.83
cluster31300	Chr2:14920713-14920943	2.58	Down	T	Potri.002G189100	115.09	296.6
cluster31320	Chr2:15025381-15026779	2.08	Down	T	Potri.002G190100	63.07	131.08
cluster31329	Chr2:15110077-15110655	2.62	Down	T	Potri.002G190800	48.09	126.08
cluster31356	Chr2:15303563-15304475	5.37	Down	F	Potri.002G192100	6.31	33.88
cluster31374	Chr2:15452012-15452519	2.44	Down	T	Potri.002G193500	23.65	57.76
cluster31568	Chr2:16772466-16773335	2.41	Down	T	Potri.002G204800	258.57	622.63
cluster31778	Chr2:17927393-17928167	3.45	Down	T	Potri.002G209500	48.88	168.85
cluster31780	Chr2:17934796-17935570	3.45	Down	T	Potri.002G209600	48.88	168.85
cluster31795	Chr2:18083246-18088553	2.79	Down	T	Potri.002G210300	2575.43	7186.1
cluster31832	Chr2:18234792-18238560	2.04	Down	T	Potri.002G210700	1424.09	2909.32
cluster31848	Chr2:18302125-18308050	2.06	Down	T	Potri.002G211100	1035.06	2131.72
cluster31860	Chr2:18390448-18391075	2.85	Down	F	Potri.002G211800	61.88	176.07
cluster31939	Chr2:18980724-18981575	2.69	Down	T	Potri.002G212300	61.88	166.63
cluster31940	Chr2:18982594-18983653	2.43	Down	T	Potri.002G212300	152.93	372.14
cluster32154	Chr2:20413120-20415304	2.12	Down	T	Potri.002G219300	527.78	1117.52
cluster32155	Chr2:20416064-20416916	2.31	Down	T	Potri.002G219300	87.9	203.29
cluster32193	Chr2:20799763-20800654	3.14	Down	T	Potri.002G221100	10.25	32.21
cluster32197	Chr2:20840619-20841127	3.62	Down	F	Potri.002G221400	78.04	282.16
cluster32290	Chr2:21486877-21487874	2.11	Down	T	Potri.002G225900	98.15	206.62
cluster32311	Chr2:21706738-21706916	2.68	Down	T	Potri.002G227400	27.59	73.87
cluster32458	Chr2:22927793-22928173	2.49	Down	T	Potri.002G235700	65.82	163.85
cluster32499	Chr2:23325932-23326209	2.3	Down	T	Potri.002G240700	51.24	117.75
cluster32553	Chr2:23781468-23781825	2.64	Down	T	Potri.002G246700	177.37	468.22
cluster32633	Chr2:24384799-24385147	2.62	Down	T	Potri.002G254500	139.14	364.91
cluster32653	Chr2:24552070-24552273	2.47	Down	T	Potri.002G256200	52.42	129.41
cluster32655	Chr2:24639361-24639563	2.54	Down	F	Potri.002G257700	14.19	36.1
cluster32763	Chr2:25249527-25249794	2.48	Down	T	Potri.002G263900	44.15	109.42
cluster32767	Chr3:17722-18438	2.57	Down	F	Potri.003G000200	94.99	244.39
cluster32768	Chr3:18885-19543	2.19	Down	T	Potri.003G000300	127.31	279.38
cluster32769	Chr3:19938-20664	2.87	Down	F	Potri.003G000300	76.47	219.39
cluster32801	Chr3:320784-321676	2.21	Down	T	Potri.003G003100	207.72	459.89
cluster32803	Chr3:351259-351536	2.75	Down	T	Potri.003G003700	40.6	111.64
cluster32824	Chr3:527719-528965	2.4	Down	T	Potri.003G006400	434.76	1044.76
cluster32844	Chr3:616776-617474	2.24	Down	T	Potri.003G007500	30.74	68.87
cluster32847	Chr3:664531-665566	2.72	Down	T	Potri.003G008100	28.77	78.32
cluster33001	Chr3:1545041-1545604	2.15	Down	T	Potri.003G013300	74.5	159.96
cluster33021	Chr3:1657606-1658091	2.73	Down	T	Potri.003G014100	19.31	52.77
cluster33146	Chr3:2525729-2525905	3.57	Down	T	Potri.003G021000	97.75	349.36
cluster33181	Chr3:2852628-2854353	2.14	Down	T	Potri.003G024000	105.24	224.95
cluster33216	Chr3:3077682-3080083	2.45	Down	T	Potri.003G025700	116.28	284.93
cluster33222	Chr3:3129264-3129877	2.15	Down	T	Potri.003G026100	23.26	49.99
cluster33254	Chr3:3287058-3287637	2.49	Down	T	Potri.003G026900	255.41	635.41
cluster33256	Chr3:3288532-3289231	2.15	Down	T	Potri.003G026900	106.42	228.28
cluster33260	Chr3:3311972-3312310	2.51	Down	T	Potri.003G027100	117.07	293.82
cluster33290	Chr3:3432884-3434377	2.16	Down	T	Potri.003G027500	20.1	43.32
cluster33297	Chr3:3471765-3473599	2.1	Down	T	Potri.003G027700	69.77	146.63
cluster33301	Chr3:3511717-3512207	2.55	Down	F	Potri.003G028200	22.86	58.32
cluster33316	Chr3:3570398-3570630	2.95	Down	F	Potri.003G028700	78.83	232.72
cluster33355	Chr3:3797633-3797891	2.37	Down	T	Potri.003G030100	97.36	230.5
cluster33376	Chr3:3907491-3907627	2.9	Down	F	Potri.003G031000	61.49	178.29
cluster33439	Chr3:4475570-4475832	2.01	Down	T	Potri.003G035000	43.36	87.2
cluster33444	Chr3:4531554-4531805	2.27	Down	T	Potri.003G035300	48.48	109.97
cluster33445	Chr3:4535199-4535372	2.28	Down	T	Potri.003G035400	107.21	244.94
cluster33482	Chr3:4915764-4915933	2.95	Down	T	Potri.003G037800	330.7	974.22
cluster33524	Chr3:5223720-5228267	2.15	Down	T	Potri.003G039200	400.86	860.91
cluster33624	Chr3:5758426-5759966	2.27	Down	T	Potri.003G043100	41.39	93.87
cluster33690	Chr3:6270785-6270930	3.07	Down	F	Potri.003G046100	24.44	74.98
cluster33830	Chr3:7337876-7338649	2.37	Down	T	Potri.003G049800	31.14	73.87
cluster34120	Chr3:9386183-9388000	2.37	Down	F	Potri.003G065100	63.85	151.08
cluster34121	Chr3:9388896-9390118	2.93	Down	F	Potri.003G065200	87.5	256.05
cluster34337	Chr3:10980962-10981575	2.96	Down	T	Potri.003G082000	20.1	59.43
cluster34382	Chr3:11368897-11369141	2.19	Down	T	Potri.003G086200	19.31	42.21
cluster34456	Chr3:12170683-12171314	10.2	Down	T	Potri.003G094600	1.58	16.11
cluster34519	Chr3:12698485-12699927	2	Down	T	Potri.003G101400	35.47	71.09
cluster34548	Chr3:13020812-13020937	3.06	Down	T	Potri.003G106100	23.26	71.09
cluster34582	Chr3:13465382-13465533	2.58	Down	F	Potri.003G111200	65.82	169.96
cluster34602	Chr3:13592971-13593744	3.62	Down	F	Potri.003G112300	33.9	122.75
cluster34639	Chr3:13811655-13812001	2.48	Down	T	Potri.003G114900	38.23	94.98
cluster34641	Chr3:13835839-13836019	3.01	Down	T	Potri.003G115300	17.34	52.21
cluster34708	Chr3:14369773-14369914	2.84	Down	T	Potri.003G121300	65.04	184.96
cluster34712	Chr3:14437543-14438938	3.55	Down	T	Potri.003G122200	12.22	43.32
cluster34816	Chr3:15527455-15528546	2.51	Down	T	Potri.003G136400	14.58	36.66
cluster34847	Chr3:15852939-15853447	5.89	Down	T	Potri.003G141700	2.36	13.89
cluster34886	Chr3:16171383-16171579	2.37	Down	T	Potri.003G145900	24.83	58.88
cluster34887	Chr3:16172408-16172920	2.79	Down	T	Potri.003G145900	306.26	855.91
cluster34890	Chr3:16185959-16186625	2.52	Down	T	Potri.003G146000	31.14	78.32
cluster34893	Chr3:16247806-16248605	2.72	Down	T	Potri.003G146900	28.38	77.2
cluster34933	Chr3:16692573-16692748	3.36	Down	F	Potri.003G153600	13.4	44.99
cluster34934	Chr3:16706124-16706244	2.77	Down	T	Potri.003G153800	22.86	63.32
cluster34980	Chr3:17110536-17110692	3.39	Down	T	Potri.003G159300	18.53	62.76
cluster35061	Chr3:17815498-17815813	2.56	Down	T	Potri.003G167700	66.22	169.4
cluster35099	Chr3:18164569-18164981	2.05	Down	F	Potri.003G171700	45.72	93.87
cluster35230	Chr3:19240137-19240947	2	Down	F	Potri.003G186200	39.42	78.87
cluster35246	Chr3:19401511-19401619	2.33	Down	T	Potri.003G188900	39.02	91.09
cluster35257	Chr3:19575917-19576133	2.05	Down	T	Potri.003G191300	26.01	53.32
cluster35320	Chr3:20177318-20178202	5.11	Down	T	Potri.003G199200	44.54	227.72
cluster35329	Chr3:20242193-20242685	2.73	Down	F	Potri.003G199800	57.94	158.3
cluster35330	Chr3:20273163-20273279	3.57	Down	F	Potri.003G200300	5.91	21.11
cluster35333	Chr3:20285262-20285862	2.31	Down	T	Potri.003G200500	101.69	234.95
cluster35343	Chr3:20414690-20415590	4.61	Down	T	Potri.003G202400	8.67	39.99
cluster35386	Chr3:20846011-20846805	2.1	Down	T	Potri.003G208200	51.24	107.75
cluster35394	Chr3:20881702-20881932	2.09	Down	T	Potri.003G208800	22.07	46.1
cluster35395	Chr3:20882286-20882553	2.04	Down	T	Potri.003G208800	37.84	77.2
cluster35413	Chr3:21048881-21049435	2.17	Down	T	Potri.003G211900	32.72	71.09
cluster35494	Chr4:44450-45270	2.33	Down	F	Potri.004G000200	74.5	173.85
cluster35524	Chr4:366339-367238	2.59	Down	T	Potri.004G005800	19.71	51.1
cluster35525	Chr4:381394-381719	2.01	Down	F	Potri.004G006000	30.74	61.65
cluster35603	Chr4:954308-954594	4.12	Down	F	Potri.004G014800	5.52	22.77
cluster35622	Chr4:1100969-1102412	8.22	Down	T	Potri.004G016200	4.73	38.88
cluster35654	Chr4:1430023-1430810	3.33	Down	F	Potri.004G021500	17.34	57.76
cluster35728	Chr4:1867378-1872615	2.31	Down	T	Potri.004G026000	1768.19	4091.27
cluster35734	Chr4:1891918-1893565	2.24	Down	T	Potri.004G026200	63.85	142.74
cluster35811	Chr4:2486385-2487661	3.73	Down	T	Potri.004G033900	21.28	79.43
cluster35950	Chr4:3609070-3609251	3.62	Down	T	Potri.004G047200	5.52	20
cluster36005	Chr4:3971164-3971353	2.73	Down	T	Potri.004G051000	137.56	376.02
cluster36062	Chr4:4394815-4395349	2.75	Down	T	Potri.004G055600	15.37	42.21
cluster36191	Chr4:5270271-5270529	2.91	Down	T	Potri.004G063800	62.67	182.18
cluster36298	Chr4:6000916-6001717	2.32	Down	T	Potri.004G071500	29.96	69.43
cluster36318	Chr4:6116549-6116731	2.84	Down	T	Potri.004G073200	80.8	229.39
cluster36353	Chr4:6391136-6393096	2.01	Down	T	Potri.004G077100	228.61	458.78
cluster36445	Chr4:7066285-7066744	2.32	Down	T	Potri.004G085200	61.49	142.74
cluster36465	Chr4:7257088-7257421	4.5	Down	F	Potri.004G086600	28.38	127.75
cluster36497	Chr4:7486379-7486653	2.73	Down	T	Potri.004G088700	26.41	72.21
cluster36656	Chr4:8655836-8656371	3.17	Down	F	Potri.004G100000	92.23	292.71
cluster36657	Chr4:8656793-8657206	2.82	Down	F	Potri.004G100000	27.99	78.87
cluster36671	Chr4:8750206-8750367	2.36	Down	T	Potri.004G100700	40.99	96.64
cluster36684	Chr4:8899464-8899647	5.42	Down	F	Potri.004G101500	5.12	27.77
cluster36736	Chr4:9245560-9246351	2.01	Down	T	Potri.004G105100	35.08	70.54
cluster36800	Chr4:9634154-9636388	2.13	Down	T	Potri.004G108700	119.04	253.27
cluster36828	Chr4:9824269-9824564	12.66	Down	T	Potri.004G110100	1.58	20
cluster36879	Chr4:10138007-10139543	2.64	Down	T	Potri.004G111700	109.18	287.71
cluster36895	Chr4:10249722-10251230	4.57	Down	T	Potri.004G113100	13.01	59.43
cluster36994	Chr4:11027843-11028894	3.66	Down	T	Potri.004G118200	17.74	64.98
cluster37158	Chr4:12258993-12259313	2.65	Down	T	Potri.004G126400	16.55	43.88
cluster37251	Chr4:13038308-13038855	2.25	Down	T	Potri.004G127500	48.48	108.86
cluster37454	Chr4:14679219-14684614	2.17	Down	T	Potri.004G130700	1217.16	2637.16
cluster37533	Chr4:15325975-15326682	2.89	Down	F	Potri.004G133300	254.63	737.05
cluster37615	Chr4:15937708-15938270	2.28	Down	T	Potri.004G137800	88.29	201.62
cluster37645	Chr4:16114375-16116205	3.48	Down	T	Potri.004G139200	25.23	87.76
cluster37648	Chr4:16132381-16133405	3.04	Down	T	Potri.004G139300	35.47	107.75
cluster37725	Chr4:16588220-16589194	13.18	Down	F	Potri.004G142500	1.18	15.55
cluster37744	Chr4:16664362-16664665	2.45	Down	T	Potri.004G143100	98.54	241.05
cluster37811	Chr4:17027359-17028992	2.11	Down	T	Potri.004G147500	62.67	132.19
cluster37929	Chr4:17695960-17696367	2.29	Down	T	Potri.004G155500	272.76	623.74
cluster37979	Chr4:17944057-17945775	2.36	Down	T	Potri.004G157800	78.04	184.4
cluster37981	Chr4:17947941-17948481	3.69	Down	T	Potri.004G157900	16.55	61.1
cluster38005	Chr4:18167029-18167143	2.45	Down	T	Potri.004G161200	50.06	122.75
cluster38034	Chr4:18345666-18346148	3.1	Down	F	Potri.004G162400	11.82	36.66
cluster38090	Chr4:18782591-18782979	3.25	Down	T	Potri.004G168700	21.68	70.54
cluster38189	Chr4:19364923-19365557	2.14	Down	T	Potri.004G175200	27.99	59.99
cluster38216	Chr4:19549650-19550373	2.36	Down	T	Potri.004G177400	77.26	182.18
cluster38284	Chr4:20068003-20069882	4.87	Down	T	Potri.004G184600	29.56	143.86
cluster38316	Chr4:20320423-20321002	2.08	Down	T	Potri.004G188000	33.9	70.54
cluster38363	Chr4:20626094-20626641	2.06	Down	T	Potri.004G192000	73.31	151.08
cluster38371	Chr4:20667258-20668044	2.18	Down	F	Potri.004G192300	37.45	81.65
cluster38372	Chr4:20673513-20674178	2.71	Down	T	Potri.004G192400	10.64	28.88
cluster38383	Chr4:20701251-20702017	2.06	Down	F	Potri.004G192500	39.81	82.2
cluster38409	Chr4:20995571-20996228	2.26	Down	T	Potri.004G197300	667.31	1508.54
cluster38506	Chr4:21864299-21865091	2.42	Down	T	Potri.004G211200	223.88	540.98
cluster38538	Chr4:22013153-22013346	2.78	Down	T	Potri.004G212300	1296.78	3599.16
cluster38579	Chr4:22273377-22273742	2.19	Down	F	Potri.004G215900	622.77	1364.68
cluster38590	Chr4:22344452-22344576	2.53	Down	T	Potri.004G216700	42.57	107.75
cluster38601	Chr4:22466059-22466285	2.5	Down	T	Potri.004G217800	81.2	203.29
cluster38628	Chr4:22666543-22668292	2.54	Down	T	Potri.004G220200	163.18	414.35
cluster38681	Chr4:23070013-23070181	2.2	Down	T	Potri.004G224500	82.77	182.18
cluster38703	Chr4:23254800-23255401	2.92	Down	F	Potri.004G227200	16.55	48.32
cluster38814	Chr4:23873610-23879776	3.4	Down	T	Potri.004G232300	7340.02	24944.2
cluster38815	Chr4:23879979-23880854	2.36	Down	T	Potri.004G232300	21.68	51.1
cluster38889	Chr5:205507-206184	4.67	Down	T	Potri.005G003400	13.8	64.43
cluster38978	Chr5:693200-695081	7.71	Down	T	Potri.005G009200	5.91	45.54
cluster39033	Chr5:1277702-1279559	2.31	Down	T	Potri.005G016200	1629.06	3758.01
cluster39037	Chr5:1291653-1291922	19.45	Down	T	Potri.005G016300	7.88	153.3
cluster39105	Chr5:1758358-1761300	2.35	Down	T	Potri.005G023300	3222.64	7567.68
cluster39120	Chr5:1907864-1908042	2.62	Down	T	Potri.005G026000	207.72	543.21
cluster39175	Chr5:2295944-2296533	2.89	Down	F	Potri.005G030900	16.55	47.77
cluster39177	Chr5:2298395-2298582	2.87	Down	F	Potri.005G031000	11.43	32.77
cluster39193	Chr5:2396098-2401546	2.08	Down	T	Potri.005G032000	549.06	1143.07
cluster39213	Chr5:2660888-2661033	3.37	Down	T	Potri.005G036300	18.13	61.1
cluster39231	Chr5:2819657-2820191	4.65	Down	F	Potri.005G038400	18.53	86.09
cluster39238	Chr5:2873828-2874068	2.07	Down	T	Potri.005G039500	87.9	181.62
cluster39258	Chr5:3023721-3024206	2.05	Down	T	Potri.005G041300	28.38	58.32
cluster39260	Chr5:3033248-3034745	2.18	Down	T	Potri.005G041400	183.28	399.35
cluster39272	Chr5:3095513-3095767	2.14	Down	T	Potri.005G042100	295.22	632.63
cluster39274	Chr5:3101614-3103209	2.44	Down	T	Potri.005G042200	1221.89	2975.97
cluster39284	Chr5:3144354-3144686	2.59	Down	F	Potri.005G042400	48.09	124.42
cluster39293	Chr5:3224267-3224533	2.36	Down	T	Potri.005G043900	108	254.39
cluster39304	Chr5:3378700-3379239	4	Down	F	Potri.005G046100	19.31	77.2
cluster39305	Chr5:3382044-3382649	2.87	Down	F	Potri.005G046200	20.1	57.76
cluster39327	Chr5:3611963-3612762	3.36	Down	F	Potri.005G050100	43.75	147.19
cluster39329	Chr5:3617236-3617891	3.57	Down	F	Potri.005G050200	44.15	157.74
cluster39330	Chr5:3621470-3622202	3.22	Down	F	Potri.005G050300	53.61	172.74
cluster39331	Chr5:3626304-3626577	2.67	Down	F	Potri.005G050400	29.96	79.98
cluster39332	Chr5:3629755-3630258	2.84	Down	F	Potri.005G050500	41.39	117.75
cluster39360	Chr5:4000279-4001279	3.69	Down	T	Potri.005G057100	8.28	30.55
cluster39391	Chr5:4361614-4362941	2.34	Down	T	Potri.005G062000	119.04	278.82
cluster39421	Chr5:4502439-4502975	2.19	Down	T	Potri.005G062800	29.17	63.87
cluster39457	Chr5:4733151-4734128	3.05	Down	F	Potri.005G065600	53.21	162.18
cluster39549	Chr5:5741802-5746086	2.06	Down	T	Potri.005G077900	2700.38	5568.7
cluster39643	Chr5:6640595-6641033	2.1	Down	F	Potri.005G088900	117.85	247.16
cluster39660	Chr5:6813351-6813579	2.71	Down	T	Potri.005G091600	35.87	97.2
cluster39661	Chr5:6820214-6820816	2.59	Down	T	Potri.005G091700	86.71	224.95
cluster39714	Chr5:7209858-7210088	3.02	Down	T	Potri.005G095900	53.21	160.52
cluster39717	Chr5:7222353-7223633	2.05	Down	T	Potri.005G096000	78.04	159.96
cluster39821	Chr5:8020540-8022270	2.01	Down	T	Potri.005G104800	719.34	1443
cluster39889	Chr5:8455857-8456268	2.67	Down	T	Potri.005G109900	46.12	123.3
cluster39895	Chr5:8501342-8501536	2.6	Down	T	Potri.005G110500	499	1299.14
cluster40047	Chr5:9513105-9513440	3.88	Down	T	Potri.005G122300	19.31	74.98
cluster40173	Chr5:10468299-10468633	5.17	Down	F	Potri.005G130400	5.91	30.55
cluster40203	Chr5:10686193-10697030	2.73	Down	T	Potri.005G132300	648476	1.76821e+06
cluster40204	Chr5:10698704-10703108	2.69	Down	T	Potri.005G132500	422458	1.13835e+06
cluster40205	Chr5:10707588-10758998	2.76	Down	T	Potri.005G132700	2.98198e+06	8.24265e+06
cluster40206	Chr5:10764427-10769823	2.34	Down	T	Potri.005G133200	206585	483498
cluster40207	Chr5:10772532-10799150	2.76	Down	T	Potri.005G133300	1.56441e+06	4.31594e+06
cluster40488	Chr5:12651305-12652962	2.18	Down	T	Potri.005G145700	141.11	307.71
cluster40525	Chr5:12975865-12976075	2.43	Down	T	Potri.005G147200	175.79	426.57
cluster40763	Chr5:14723715-14724693	2.88	Down	T	Potri.005G154100	62.28	179.4
cluster40764	Chr5:14725205-14726676	2.43	Down	T	Potri.005G154100	165.94	403.24
cluster40771	Chr5:14816477-14817732	2.2	Down	F	Potri.005G154400	51.24	112.75
cluster40772	Chr5:14818201-14819233	2.07	Down	F	Potri.005G154500	45.72	94.42
cluster40773	Chr5:14819699-14820033	3.27	Down	F	Potri.005G154500	145.05	473.78
cluster40775	Chr5:14821706-14824047	2.94	Down	F	Potri.005G154600	80.01	234.95
cluster40880	Chr5:15636514-15639825	2.29	Down	T	Potri.005G156800	224.67	515.44
cluster40972	Chr5:16195978-16196325	2.27	Down	T	Potri.005G160600	125.74	286.04
cluster41072	Chr5:16767073-16768000	2.07	Down	F	Potri.005G163200	62.67	129.97
cluster41392	Chr5:18871632-18872995	2.35	Down	T	Potri.005G173000	145.84	342.7
cluster41463	Chr5:19318533-19319500	3.98	Down	T	Potri.005G177300	22.07	87.76
cluster41532	Chr5:19828468-19828627	2.19	Down	T	Potri.005G181700	46.12	101.09
cluster41632	Chr5:20514825-20514982	2.34	Down	T	Potri.005G187700	22.07	51.65
cluster41670	Chr5:20828906-20829559	2.36	Down	T	Potri.005G191200	27.99	66.1
cluster41782	Chr5:21562664-21564075	3.34	Down	T	Potri.005G200200	94.99	317.15
cluster41818	Chr5:21840468-21840999	3.43	Down	F	Potri.005G203500	6.31	21.66
cluster41875	Chr5:22264402-22264796	2.16	Down	T	Potri.005G208600	45.33	97.75
cluster41883	Chr5:22342764-22343691	2.13	Down	F	Potri.005G209500	225.46	481
cluster41919	Chr5:22581885-22582259	2.03	Down	T	Potri.005G212300	41.39	83.87
cluster41955	Chr5:22952633-22952889	2.26	Down	T	Potri.005G216700	18.92	42.77
cluster42112	Chr5:24550694-24552357	2.18	Down	T	Potri.005G238600	236.1	514.32
cluster42118	Chr5:24584918-24586017	3.8	Down	F	Potri.005G239200	405.98	1540.75
cluster42119	Chr5:24586997-24587894	3.68	Down	F	Potri.005G239200	472.6	1739.04
cluster42160	Chr5:24955508-24955725	2.85	Down	T	Potri.005G245000	36.26	103.31
cluster42180	Chr5:25181170-25181549	2.21	Down	T	Potri.005G248500	22.86	50.54
cluster42181	Chr5:25192666-25193366	2.21	Down	F	Potri.005G248600	29.96	66.1
cluster42235	Chr5:25756951-25757079	2.61	Down	T	Potri.005G258600	48.09	125.53
cluster42263	Chr6:33382-33834	2.17	Down	F	Potri.006G000400	27.59	59.99
cluster42329	Chr6:535100-535674	4.71	Down	F	Potri.006G007900	427.66	2013.97
cluster42365	Chr6:833577-833870	4.1	Down	T	Potri.006G012500	8.67	35.55
cluster42495	Chr6:1603960-1604583	2.69	Down	T	Potri.006G022900	43.75	117.75
cluster42504	Chr6:1687050-1688687	2.03	Down	T	Potri.006G024000	165.94	337.14
cluster42505	Chr6:1706729-1706914	2.49	Down	T	Potri.006G024300	335.82	835.92
cluster42508	Chr6:1750666-1751198	2.24	Down	T	Potri.006G025400	34.29	76.65
cluster42538	Chr6:2025756-2026035	3.38	Down	T	Potri.006G029900	5.91	20
cluster42718	Chr6:3662750-3662970	2.02	Down	T	Potri.006G050700	79.23	159.96
cluster42771	Chr6:4175381-4175942	2.13	Down	T	Potri.006G057300	37.84	80.54
cluster42916	Chr6:5409450-5409948	2.82	Down	T	Potri.006G072900	31.14	87.76
cluster42950	Chr6:5656273-5658003	2.17	Down	T	Potri.006G075300	126.92	276.05
cluster42985	Chr6:5986129-5986754	5.31	Down	T	Potri.006G079100	11.82	62.76
cluster42987	Chr6:5988313-5988587	2.39	Down	T	Potri.006G079100	419.78	1004.21
cluster43058	Chr6:6618215-6618568	2.4	Down	T	Potri.006G086900	76.86	184.4
cluster43080	Chr6:6773704-6774181	4.87	Down	F	Potri.006G089100	102.48	499.33
cluster43082	Chr6:6776733-6777274	2.17	Down	T	Potri.006G089100	45.33	98.31
cluster43156	Chr6:7387451-7389898	2.74	Down	T	Potri.006G096800	1981.43	5423.18
cluster43157	Chr6:7391860-7392249	2.48	Down	T	Potri.006G096800	92.23	228.28
cluster43329	Chr6:8657979-8660196	2.3	Down	T	Potri.006G110900	590.05	1357.46
cluster43330	Chr6:8660257-8662073	2.32	Down	T	Potri.006G110900	512.8	1191.39
cluster43352	Chr6:8775136-8775469	2.76	Down	T	Potri.006G112400	18.13	49.99
cluster43353	Chr6:8775803-8776314	2.53	Down	T	Potri.006G112400	22.86	57.76
cluster43434	Chr6:9476206-9476416	3.34	Down	F	Potri.006G119600	7.49	24.99
cluster43478	Chr6:9848898-9849268	2.67	Down	F	Potri.006G123000	37.45	99.98
cluster43663	Chr6:11245464-11245882	2.28	Down	T	Potri.006G136400	119.82	272.71
cluster43714	Chr6:11612536-11612909	2.71	Down	F	Potri.006G139000	9.85	26.66
cluster43769	Chr6:12016336-12017032	2.77	Down	T	Potri.006G142300	469.44	1298.03
cluster43779	Chr6:12083837-12084642	2.92	Down	T	Potri.006G143100	48.09	140.52
cluster43838	Chr6:12637000-12638325	2.2	Down	T	Potri.006G147200	85.14	187.18
cluster43921	Chr6:13271990-13276347	2.23	Down	T	Potri.006G151700	378.39	842.58
cluster43957	Chr6:13654259-13654501	3.39	Down	T	Potri.006G153300	120.22	407.68
cluster44095	Chr6:14541521-14541687	2.59	Down	T	Potri.006G157000	81.2	210.51
cluster44205	Chr6:15848086-15848733	2.67	Down	T	Potri.006G162200	262.12	699.28
cluster44295	Chr6:16535400-16535699	2.94	Down	T	Potri.006G164300	61.49	181.07
cluster44301	Chr6:16594637-16595080	2.34	Down	F	Potri.006G164600	32.72	76.65
cluster44302	Chr6:16598353-16598475	2.74	Down	T	Potri.006G164600	37.84	103.86
cluster44345	Chr6:16933606-16933784	2.02	Down	T	Potri.006G166400	141.11	285.49
cluster44406	Chr6:17382981-17384378	2.73	Down	T	Potri.006G168500	32.72	89.42
cluster44431	Chr6:17584874-17585045	3.55	Down	T	Potri.006G169600	12.22	43.32
cluster44433	Chr6:17602679-17602857	2.18	Down	T	Potri.006G169700	44.15	96.09
cluster44434	Chr6:17607100-17607267	2.41	Down	F	Potri.006G169700	50.85	122.75
cluster44472	Chr6:17806498-17806868	2.06	Down	T	Potri.006G170600	50.06	103.31
cluster44523	Chr6:18126147-18126707	3.28	Down	T	Potri.006G172400	34.69	113.86
cluster44588	Chr6:18505637-18506567	2.42	Down	T	Potri.006G174200	104.06	252.16
cluster44734	Chr6:19546215-19546390	2.97	Down	T	Potri.006G181300	14.98	44.43
cluster44748	Chr6:19696937-19698829	2.33	Down	T	Potri.006G183100	284.58	662.07
cluster44870	Chr6:20609650-20614215	2.66	Down	F	Potri.006G191200	115.09	306.04
cluster44894	Chr6:20783572-20786967	5.64	Down	T	Potri.006G193400	13.4	75.54
cluster44967	Chr6:21284911-21285957	2.03	Down	T	Potri.006G197400	198.66	402.68
cluster44993	Chr6:21483837-21484222	2.18	Down	T	Potri.006G199500	60.7	132.19
cluster44998	Chr6:21492688-21495612	2.09	Down	T	Potri.006G199800	1371.67	2864.33
cluster45140	Chr6:22483582-22484221	2.03	Down	T	Potri.006G210200	36.66	74.43
cluster45145	Chr6:22527432-22527811	2.57	Down	T	Potri.006G210700	13.4	34.44
cluster45186	Chr6:22881992-22884666	2.08	Down	T	Potri.006G215400	123.37	256.61
cluster45188	Chr6:22886338-22887538	2.21	Down	T	Potri.006G215500	150.57	332.14
cluster45400	Chr6:24485272-24485481	2.44	Down	T	Potri.006G235400	29.56	72.21
cluster45474	Chr6:24984607-24984903	3.3	Down	T	Potri.006G240700	124.16	409.9
cluster45508	Chr6:25203252-25203546	2.08	Down	T	Potri.006G243900	81.2	168.85
cluster45534	Chr6:25483359-25483612	2.15	Down	T	Potri.006G248000	52.82	113.31
cluster45565	Chr6:25789681-25789881	3.29	Down	F	Potri.006G252400	16.55	54.43
cluster45689	Chr6:26981616-26981801	2.74	Down	F	Potri.006G268500	108	295.49
cluster45701	Chr6:27044078-27044344	2.73	Down	T	Potri.006G269100	36.66	99.98
cluster45705	Chr6:27054901-27055473	3.27	Down	T	Potri.006G269200	20.89	68.32
cluster45726	Chr6:27172282-27173003	3.88	Down	T	Potri.006G269800	4.73	18.33
cluster45728	Chr6:27179878-27180373	3.16	Down	T	Potri.006G269900	181.31	573.76
cluster45735	Chr6:27279400-27281447	2.24	Down	T	Potri.006G271500	698.45	1562.41
cluster45824	Chr7:173554-175888	2.12	Down	T	Potri.007G002500	1055.56	2236.7
cluster45832	Chr7:258681-259421	2.8	Down	T	Potri.007G003600	53.61	149.97
cluster45833	Chr7:259570-260774	2.4	Down	T	Potri.007G003600	1264.85	3040.96
cluster45875	Chr7:608219-608491	2.68	Down	T	Potri.007G008000	71.74	192.18
cluster45905	Chr7:890735-890943	2.15	Down	F	Potri.007G011200	24.04	51.65
cluster46112	Chr7:2605467-2606301	3.23	Down	F	Potri.007G033700	65.43	211.06
cluster46172	Chr7:2962870-2963273	2.24	Down	T	Potri.007G037900	29.96	67.21
cluster46200	Chr7:3093268-3093735	2.26	Down	T	Potri.007G038900	64.25	144.97
cluster46204	Chr7:3108219-3108692	2.2	Down	T	Potri.007G039000	69.77	153.3
cluster46332	Chr7:4089498-4090274	2.01	Down	T	Potri.007G045900	26.8	53.88
cluster46418	Chr7:4789921-4790476	2.55	Down	F	Potri.007G050000	35.47	90.53
cluster46479	Chr7:5253731-5253946	2.47	Down	T	Potri.007G052400	80.8	199.4
cluster46560	Chr7:5981469-5982176	2.49	Down	T	Potri.007G056600	39.02	97.2
cluster46750	Chr7:7429259-7430380	2.32	Down	T	Potri.007G062200	212.45	492.11
cluster46827	Chr7:7974004-7975168	2.35	Down	T	Potri.007G063500	167.52	393.24
cluster46879	Chr7:8290222-8290475	3.06	Down	T	Potri.007G065400	16.16	49.43
cluster46900	Chr7:8411820-8412017	2.44	Down	T	Potri.007G066100	14.58	35.55
cluster46981	Chr7:8998430-8998781	2.2	Down	T	Potri.007G069000	43.75	96.09
cluster47106	Chr7:9906579-9907956	2.1	Down	T	Potri.007G075200	162.39	340.48
cluster47130	Chr7:10080040-10080253	2.34	Down	T	Potri.007G076800	19.71	46.1
cluster47154	Chr7:10296816-10296994	2.82	Down	T	Potri.007G078700	26.8	75.54
cluster47167	Chr7:10485534-10485815	2.27	Down	T	Potri.007G081100	24.44	55.54
cluster47196	Chr7:10680446-10680727	2.19	Down	T	Potri.007G082500	54.79	119.97
cluster47219	Chr7:10785711-10787413	2.67	Down	T	Potri.007G083100	26.8	71.65
cluster47262	Chr7:11024117-11027320	2.17	Down	T	Potri.007G084500	465.9	1011.43
cluster47312	Chr7:11358405-11358988	2.86	Down	F	Potri.007G087600	50.06	143.3
cluster47351	Chr7:11606040-11607271	2.82	Down	T	Potri.007G089700	28.77	81.09
cluster47378	Chr7:11841947-11842448	3.61	Down	T	Potri.007G091500	16.16	58.32
cluster47421	Chr7:12136629-12137243	2.31	Down	T	Potri.007G094700	37.45	86.65
cluster47451	Chr7:12371460-12371710	3.29	Down	T	Potri.007G097500	10.64	34.99
cluster47511	Chr7:12921401-12922023	2.37	Down	T	Potri.007G104600	20.89	49.43
cluster47596	Chr7:13777410-13778047	2.55	Down	T	Potri.007G117300	16.55	42.21
cluster47605	Chr7:13839796-13841077	2.29	Down	T	Potri.007G118700	113.91	260.49
cluster47623	Chr7:13996682-13997383	2.39	Down	F	Potri.007G121300	26.01	62.21
cluster47649	Chr7:14211055-14212629	2.63	Down	T	Potri.007G125200	1044.52	2746.58
cluster47652	Chr7:14229868-14230467	2.55	Down	F	Potri.007G125800	16.55	42.21
cluster47665	Chr7:14422293-14422467	2.64	Down	T	Potri.007G128300	12.22	32.21
cluster47669	Chr7:14471101-14471279	2.81	Down	T	Potri.007G129000	107.61	302.15
cluster47736	Chr7:15149276-15149812	2.17	Down	T	Potri.007G140600	203.39	442.12
cluster47737	Chr7:15151048-15154075	2.07	Down	T	Potri.007G140600	428.45	888.68
cluster47742	Chr7:15182899-15183592	2.65	Down	F	Potri.007G141400	33.11	87.76
cluster47752	Chr7:15247118-15251412	2.14	Down	T	Potri.007G142500	3680.26	7873.72
cluster47759	Chr7:15272503-15276064	2.04	Down	T	Potri.007G142900	229.01	468.22
cluster47762	Chr7:15285003-15285809	2.99	Down	T	Potri.007G143100	18.92	56.65
cluster47811	Chr8:15635-15844	2.22	Down	F	Potri.008G000500	1010.62	2246.14
cluster47812	Chr8:24436-24604	2.11	Down	F	Potri.008G000700	163.97	346.59
cluster47829	Chr8:212200-213667	2.4	Down	T	Potri.008G003700	26.8	64.43
cluster47854	Chr8:466407-466926	2.09	Down	T	Potri.008G008400	36.66	76.65
cluster47861	Chr8:592063-592348	2.23	Down	T	Potri.008G010700	56.76	126.64
cluster47901	Chr8:1024819-1025119	3.04	Down	T	Potri.008G019300	15.37	46.66
cluster47937	Chr8:1524705-1526366	2.34	Down	T	Potri.008G028300	92.23	216.06
cluster47971	Chr8:1820770-1821279	4.35	Down	T	Potri.008G032900	67.4	293.26
cluster47980	Chr8:1970737-1971130	2.18	Down	F	Potri.008G035600	97.36	212.73
cluster48035	Chr8:2582651-2583696	2.31	Down	T	Potri.008G044900	81.59	188.29
cluster48075	Chr8:2990442-2992286	2.09	Down	T	Potri.008G050600	61.88	129.41
cluster48086	Chr8:3135199-3135728	2.67	Down	T	Potri.008G052900	157.27	419.9
cluster48097	Chr8:3358751-3358871	2.86	Down	F	Potri.008G056800	200.63	573.2
cluster48099	Chr8:3379835-3380777	2.78	Down	T	Potri.008G057200	47.3	131.64
cluster48109	Chr8:3457012-3457250	3.45	Down	T	Potri.008G058000	11.43	39.44
cluster48118	Chr8:3506824-3507596	3.14	Down	F	Potri.008G058500	44.54	139.97
cluster48139	Chr8:3692691-3694011	5.49	Down	F	Potri.008G061200	7.49	41.1
cluster48174	Chr8:4051809-4052156	2.3	Down	T	Potri.008G066700	51.24	117.75
cluster48178	Chr8:4083570-4083923	2.78	Down	T	Potri.008G067300	48.09	133.86
cluster48258	Chr8:4950839-4951015	2.5	Down	T	Potri.008G079500	31.93	79.98
cluster48292	Chr8:5305001-5305242	5.53	Down	F	Potri.008G084500	5.12	28.33
cluster48354	Chr8:6197296-6197590	2.38	Down	T	Potri.008G098800	107.61	256.05
cluster48482	Chr8:7529627-7529991	3.78	Down	T	Potri.008G117100	125.34	473.22
cluster48536	Chr8:8119103-8119510	4.77	Down	F	Potri.008G124700	5.12	24.44
cluster48602	Chr8:8763247-8763384	2.61	Down	T	Potri.008G132500	23.65	61.65
cluster48632	Chr8:9126569-9127378	3.06	Down	T	Potri.008G137100	114.7	351.03
cluster48641	Chr8:9171101-9171545	2.83	Down	T	Potri.008G137900	35.08	99.42
cluster48723	Chr8:10054875-10055317	2.36	Down	T	Potri.008G149200	53.61	126.64
cluster48793	Chr8:10673320-10673685	3.72	Down	F	Potri.008G157400	15.37	57.21
cluster48794	Chr8:10673887-10674394	4.23	Down	F	Potri.008G157400	5.52	23.33
cluster48800	Chr8:10707563-10707796	2.21	Down	T	Potri.008G157900	151.75	336.03
cluster48828	Chr8:11026717-11027872	2.06	Down	T	Potri.008G162200	27.2	56.1
cluster48852	Chr8:11237951-11238087	2.38	Down	T	Potri.008G164900	57.15	136.08
cluster48877	Chr8:11400945-11401983	5.32	Down	F	Potri.008G167000	3.55	18.88
cluster48947	Chr8:12027268-12027408	2.5	Down	F	Potri.008G175700	157.27	393.24
cluster48981	Chr8:12381035-12381429	6.58	Down	F	Potri.008G181600	7.09	46.66
cluster48982	Chr8:12387159-12387935	2.22	Down	T	Potri.008G181700	35.08	77.76
cluster49076	Chr8:12960159-12960403	3.14	Down	T	Potri.008G187800	47.3	148.3
cluster49099	Chr8:13115395-13116456	2.04	Down	F	Potri.008G189300	44.93	91.65
cluster49100	Chr8:13117720-13118603	2.2	Down	F	Potri.008G189300	18.92	41.66
cluster49141	Chr8:13422914-13423048	3.04	Down	T	Potri.008G192800	27.59	83.87
cluster49152	Chr8:13526265-13526895	2.14	Down	T	Potri.008G193900	102.88	219.95
cluster49229	Chr8:14146774-14149131	2.05	Down	T	Potri.008G201000	202.99	416.01
cluster49237	Chr8:14207847-14208032	2.6	Down	F	Potri.008G201600	14.98	38.88
cluster49375	Chr8:15226636-15227259	3.57	Down	T	Potri.008G207300	73.71	263.27
cluster49417	Chr8:15828373-15828625	3.86	Down	F	Potri.008G208400	9.07	34.99
cluster49420	Chr8:15831247-15832201	3.2	Down	T	Potri.008G208700	94.2	301.6
cluster49423	Chr8:15853626-15854664	2.46	Down	F	Potri.008G208800	13.8	33.88
cluster49508	Chr8:16454681-16455021	2.21	Down	T	Potri.008G211100	69.37	153.3
cluster49556	Chr8:16748898-16749512	2.47	Down	T	Potri.008G212900	27.2	67.21
cluster49702	Chr8:17828645-17829439	2.65	Down	T	Potri.008G217400	36.66	97.2
cluster49870	Chr8:18844042-18845045	2.78	Down	T	Potri.008G222400	57.15	158.85
cluster49891	Chr8:18936220-18936705	2.42	Down	T	Potri.008G223100	33.9	82.2
cluster49907	Chr8:19028183-19029948	3.12	Down	T	Potri.008G223900	120312	375062
cluster49926	Chr8:19138249-19142532	2.36	Down	T	Potri.008G224300	217915	513487
cluster49927	Chr8:19148364-19154790	2.92	Down	T	Potri.008G224400	429326	1.25208e+06
cluster49929	Chr8:19167051-19170057	3	Down	T	Potri.008G224500	240643	722925
cluster49930	Chr8:19184150-19192729	2.73	Down	T	Potri.008G224600	641118	1.7475e+06
cluster49983	Chr9:222556-223367	2.78	Down	T	Potri.009G000300	145.44	404.91
cluster50014	Chr9:500229-500878	3.04	Down	T	Potri.009G001300	17.74	53.88
cluster50018	Chr9:542423-542761	3.03	Down	F	Potri.009G001400	85.93	260.49
cluster50046	Chr9:741498-742978	2.4	Down	T	Potri.009G003000	18.53	44.43
cluster50051	Chr9:776357-776714	2.46	Down	T	Potri.009G003300	87.9	216.06
cluster50064	Chr9:870032-871503	2.21	Down	F	Potri.009G003600	130.86	289.38
cluster50129	Chr9:1328816-1329726	7.06	Down	F	Potri.009G007300	2.36	16.66
cluster50166	Chr9:1585978-1586351	2.28	Down	T	Potri.009G008900	611.34	1394.67
cluster50205	Chr9:1880242-1880501	2.07	Down	T	Potri.009G010400	25.23	52.21
cluster50313	Chr9:2724680-2725060	3.86	Down	T	Potri.009G016300	16.55	63.87
cluster50314	Chr9:2726909-2727620	2.4	Down	F	Potri.009G016300	94.6	226.61
cluster50316	Chr9:2730064-2730905	2.67	Down	F	Potri.009G016400	89.47	238.83
cluster50361	Chr9:2970366-2970528	3.16	Down	T	Potri.009G018000	73.71	233.28
cluster50371	Chr9:3069900-3071373	2.46	Down	T	Potri.009G018800	184.86	455.45
cluster50624	Chr9:4992156-4992305	2.61	Down	T	Potri.009G043300	45.72	119.42
cluster50638	Chr9:5183872-5184029	2.42	Down	T	Potri.009G046200	29.56	71.65
cluster50639	Chr9:5196059-5196225	2.42	Down	T	Potri.009G046400	51.63	124.97
cluster50653	Chr9:5355125-5355405	2.71	Down	T	Potri.009G048200	46.9	127.19
cluster50654	Chr9:5362617-5363007	2.04	Down	T	Potri.009G048300	150.57	307.15
cluster50673	Chr9:5522647-5527987	2.13	Down	T	Potri.009G050400	325.97	693.73
cluster50684	Chr9:5666262-5666575	2.05	Down	T	Potri.009G052000	68.98	141.08
cluster50721	Chr9:5983664-5983860	2.28	Down	T	Potri.009G057000	123.77	281.6
cluster50722	Chr9:6003071-6003401	2.22	Down	T	Potri.009G057400	22.47	49.99
cluster50752	Chr9:6358126-6358687	2.04	Down	T	Potri.009G061700	78.04	158.85
cluster50773	Chr9:6527478-6527690	2.24	Down	T	Potri.009G064400	21.28	47.77
cluster50781	Chr9:6587282-6587938	2.56	Down	T	Potri.009G065100	30.35	77.76
cluster50909	Chr9:8038737-8038931	2.4	Down	T	Potri.009G086100	74.1	177.74
cluster50933	Chr9:8327551-8327757	2.66	Down	F	Potri.009G090800	73.31	194.95
cluster50969	Chr9:8657879-8658090	5.12	Down	F	Potri.009G095900	13.01	66.65
cluster50986	Chr9:8833667-8833782	4.38	Down	T	Potri.009G099200	123.77	541.54
cluster51002	Chr9:9012308-9012798	3.19	Down	T	Potri.009G102100	37.45	119.42
cluster51031	Chr9:9355512-9356699	3.81	Down	F	Potri.009G108100	100.51	382.69
cluster51045	Chr9:9572618-9573244	2.77	Down	T	Potri.009G112100	104.06	288.27
cluster51054	Chr9:9661057-9661261	2.36	Down	T	Potri.009G113600	29.17	68.87
cluster51066	Chr9:9780042-9781037	2.16	Down	T	Potri.009G115700	65.43	141.63
cluster51104	Chr9:10151900-10152067	2.2	Down	T	Potri.009G121300	529.35	1165.84
cluster51120	Chr9:10333372-10334438	2.84	Down	F	Potri.009G124100	30.74	87.2
cluster51129	Chr9:10454952-10456355	2.61	Down	T	Potri.009G126100	152.15	397.13
cluster51160	Chr9:10782986-10783750	2.15	Down	T	Potri.009G133200	289.31	622.08
cluster51211	Chr9:11381963-11382476	2.97	Down	T	Potri.009G143300	81.98	243.28
cluster51217	Chr9:11443143-11443259	2.19	Down	T	Potri.009G144500	66.22	144.97
cluster51226	Chr9:11506480-11507500	2.25	Down	T	Potri.009G145300	115.88	260.49
cluster51230	Chr9:11539490-11540113	2.09	Down	T	Potri.009G145800	32.72	68.32
cluster51231	Chr9:11560295-11560588	2.51	Down	T	Potri.009G146300	29.17	73.32
cluster51266	Chr9:11997825-11998590	2.12	Down	T	Potri.009G153300	99.72	211.06
cluster51273	Chr9:12076074-12078041	3.22	Down	T	Potri.009G154800	1335.01	4304.55
cluster51280	Chr9:12196674-12197893	4.96	Down	T	Potri.009G157000	32.72	162.18
cluster51310	Chr9:12604294-12604885	2.7	Down	T	Potri.009G164800	111.94	302.15
cluster51311	Chr9:12605129-12605747	2.38	Down	T	Potri.009G164800	67.8	161.07
cluster51330	Chr9:12824560-12825737	2.49	Down	T	Potri.009G168700	72.92	181.62
cluster7321	Chr10:62330-62804	2.71	Down	T	Potri.010G000600	90.66	246.05
cluster7546	Chr10:1738232-1738440	3.07	Down	T	Potri.010G013900	119.04	365.47
cluster7599	Chr10:2116732-2117196	2.63	Down	T	Potri.010G016200	61.09	160.52
cluster7675	Chr10:2678181-2678382	3.24	Down	T	Potri.010G019700	73.31	237.72
cluster7710	Chr10:2972667-2973298	2.35	Down	T	Potri.010G021100	33.11	77.76
cluster7717	Chr10:2998768-2999724	2.41	Down	T	Potri.010G021300	102.88	248.28
cluster7755	Chr10:3280836-3280969	2.37	Down	T	Potri.010G023200	57.94	137.19
cluster7814	Chr10:3741172-3741387	2.41	Down	T	Potri.010G026600	100.12	241.05
cluster7933	Chr10:4511232-4511663	2.64	Down	T	Potri.010G030700	79.23	209.4
cluster8018	Chr10:5229805-5230076	2.38	Down	F	Potri.010G032700	100.12	238.28
cluster8033	Chr10:5340238-5340732	2.49	Down	F	Potri.010G033200	60.31	149.97
cluster8161	Chr10:6125691-6126050	3.38	Down	T	Potri.010G035100	13.8	46.66
cluster8176	Chr10:6235112-6236871	2.65	Down	T	Potri.010G036000	33.11	87.76
cluster8189	Chr10:6447880-6448778	2.31	Down	T	Potri.010G037700	22.86	52.77
cluster8203	Chr10:6538388-6538532	2.87	Down	T	Potri.010G038400	51.63	148.3
cluster8367	Chr10:7648335-7649398	2.91	Down	F	Potri.010G045700	18.92	54.99
cluster8417	Chr10:7973715-7975683	2.4	Down	T	Potri.010G048800	161.6	387.69
cluster8430	Chr10:8086121-8087565	2.07	Down	F	Potri.010G050200	31.93	66.1
cluster8457	Chr10:8333565-8333927	2.09	Down	F	Potri.010G052900	93.81	196.07
cluster8567	Chr10:8978623-8980286	2.33	Down	T	Potri.010G061400	158.45	369.36
cluster8568	Chr10:8980496-8980856	2.25	Down	T	Potri.010G061400	31.14	69.98
cluster8646	Chr10:9670080-9670767	3.01	Down	T	Potri.010G069800	26.41	79.43
cluster8736	Chr10:10264973-10265414	2.02	Down	T	Potri.010G076700	63.07	127.19
cluster8738	Chr10:10316571-10320156	2.11	Down	T	Potri.010G078100	129.28	273.27
cluster8883	Chr10:11264179-11264375	2.76	Down	T	Potri.010G088900	28.38	78.32
cluster8930	Chr10:11643315-11643558	2.49	Down	F	Potri.010G093500	21.68	53.88
cluster8980	Chr10:12201352-12201682	2.54	Down	T	Potri.010G100600	92.63	234.95
cluster9005	Chr10:12553734-12554446	2.47	Down	F	Potri.010G105200	664.55	1641.28
cluster9014	Chr10:12684494-12684861	4.71	Down	T	Potri.010G107000	22.86	107.75
cluster9017	Chr10:12739462-12739801	2.9	Down	T	Potri.010G107800	417.81	1210.27
cluster9036	Chr10:12838247-12839728	2.61	Down	T	Potri.010G109100	280.64	732.05
cluster9110	Chr10:13779193-13781746	2.76	Down	T	Potri.010G121000	38.63	106.64
cluster9176	Chr10:14500116-14500288	2.06	Down	T	Potri.010G129800	155.3	319.37
cluster9198	Chr10:14691417-14691525	2.74	Down	T	Potri.010G132200	700.03	1915.66
cluster9222	Chr10:14926094-14926480	2.94	Down	T	Potri.010G135400	352.77	1036.42
cluster9243	Chr10:15168978-15169529	2.67	Down	F	Potri.010G139000	26.8	71.65
cluster9251	Chr10:15197074-15197675	2.35	Down	F	Potri.010G139400	34.29	80.54
cluster9252	Chr10:15203350-15203606	2.86	Down	T	Potri.010G139500	68.98	197.18
cluster9279	Chr10:15525065-15527042	2.91	Down	T	Potri.010G144800	35.47	103.31
cluster9372	Chr10:16664639-16665047	2.62	Down	F	Potri.010G161200	11.43	29.99
cluster9395	Chr10:16937612-16941414	2.66	Down	T	Potri.010G165800	934.16	2484.42
cluster9403	Chr10:16982428-16982700	3.03	Down	T	Potri.010G166900	169.49	513.77
cluster9464	Chr10:17737598-17737907	2.26	Down	T	Potri.010G178100	168.31	379.91
cluster9465	Chr10:17744866-17745263	2.29	Down	T	Potri.010G178200	82.38	188.29
cluster9468	Chr10:17786103-17786496	2.39	Down	F	Potri.010G178800	33.9	81.09
cluster9492	Chr10:18033303-18033435	2.66	Down	F	Potri.010G182700	17.34	46.1
cluster9493	Chr10:18035119-18035378	4.32	Down	T	Potri.010G182700	24.83	107.2
cluster9523	Chr10:18374585-18375055	3.02	Down	T	Potri.010G187800	256.2	773.15
cluster9529	Chr10:18441298-18441504	2.26	Down	T	Potri.010G188400	57.55	129.97
cluster9546	Chr10:18663055-18663562	2.09	Down	T	Potri.010G191800	59.91	124.97
cluster9585	Chr10:18981148-18981511	3.09	Down	T	Potri.010G196600	26.41	81.65
cluster9600	Chr10:19126418-19126821	4.06	Down	T	Potri.010G199000	57.94	234.95
cluster9608	Chr10:19240661-19241516	3	Down	F	Potri.010G200500	63.07	189.4
cluster9688	Chr10:20151406-20151602	2.29	Down	F	Potri.010G213500	1866.73	4277.34
cluster9693	Chr10:20266471-20266817	2.38	Down	T	Potri.010G215500	16.55	39.44
cluster9743	Chr10:20811287-20811513	2.83	Down	F	Potri.010G224000	295.22	835.92
cluster9771	Chr10:21197031-21197472	2.48	Down	T	Potri.010G229500	202.6	503.22
cluster9780	Chr10:21293462-21294325	2.15	Down	T	Potri.010G231200	106.42	228.28
cluster9799	Chr10:21547195-21547413	2.71	Down	T	Potri.010G235100	49.66	134.41
cluster9802	Chr10:21579130-21579308	2.65	Down	T	Potri.010G235800	39.02	103.31
cluster9807	Chr10:21691091-21691289	2.76	Down	T	Potri.010G237900	9.46	26.11
cluster9836	Chr10:22137317-22137655	2.58	Down	T	Potri.010G247700	23.26	59.99
cluster9857	Chr10:22507433-22508148	2.46	Down	T	Potri.010G254700	21.68	53.32
cluster9882	Chr11:129137-129650	2.55	Down	T	Potri.011G002300	27.2	69.43
cluster9883	Chr11:133451-133711	3.4	Down	T	Potri.011G002400	11.43	38.88
cluster9945	Chr11:569693-570596	2.42	Down	T	Potri.011G007700	29.17	70.54
cluster9948	Chr11:608215-608379	3.66	Down	T	Potri.011G008400	31.14	113.86
cluster9993	Chr11:906406-907026	2.81	Down	T	Potri.011G011500	258.96	727.05
cluster10023	Chr11:1049947-1055458	2.05	Down	T	Potri.011G013100	1175.77	2413.88
cluster10078	Chr11:1401200-1402813	2.46	Down	T	Potri.011G016900	201.02	494.33
cluster10093	Chr11:1455699-1456156	4.38	Down	T	Potri.011G017400	2983.78	13059.2
cluster10094	Chr11:1456659-1457196	2.41	Down	T	Potri.011G017400	173.82	418.79
cluster10129	Chr11:1631654-1633062	2.38	Down	T	Potri.011G019100	60.7	144.41
cluster10159	Chr11:1755447-1755635	2.54	Down	F	Potri.011G020500	296.01	751.49
cluster10169	Chr11:1815682-1816262	2.31	Down	T	Potri.011G021300	121.01	279.93
cluster10209	Chr11:2135855-2136330	2.03	Down	T	Potri.011G026000	119.43	242.17
cluster10236	Chr11:2326446-2326710	2.22	Down	T	Potri.011G028300	21.28	47.21
cluster10237	Chr11:2333045-2333332	2.69	Down	T	Potri.011G028400	872.67	2343.9
cluster10270	Chr11:2604350-2604548	2.66	Down	T	Potri.011G031400	41.39	109.97
cluster10335	Chr11:3058133-3058730	2.03	Down	F	Potri.011G036300	52.82	107.2
cluster10354	Chr11:3155851-3159977	2.38	Down	T	Potri.011G037400	541.97	1287.48
cluster10363	Chr11:3241210-3243668	2.45	Down	T	Potri.011G038300	2745.71	6718.99
cluster10391	Chr11:3438446-3438709	2.71	Down	T	Potri.011G040500	36.66	99.42
cluster10394	Chr11:3441412-3442138	2.32	Down	T	Potri.011G040600	31.14	72.21
cluster10529	Chr11:4263158-4263428	2.27	Down	T	Potri.011G049700	56.36	127.75
cluster10617	Chr11:4889442-4889609	2.19	Down	T	Potri.011G055800	57.94	126.64
cluster10686	Chr11:5406776-5407063	2.34	Down	T	Potri.011G060200	37.45	87.76
cluster10814	Chr11:6349457-6350014	2.58	Down	T	Potri.011G068000	109.18	281.6
cluster10933	Chr11:7202242-7203483	4.29	Down	F	Potri.011G074500	8.28	35.55
cluster10934	Chr11:7203782-7210977	2.07	Down	F	Potri.011G074600	3498.55	7250.53
cluster10936	Chr11:7214715-7218039	2.42	Down	T	Potri.011G074900	22315.7	54004.6
cluster10966	Chr11:7414659-7415146	3.49	Down	T	Potri.011G076100	16.55	57.76
cluster11018	Chr11:7757706-7758641	2.53	Down	T	Potri.011G078300	307.05	777.04
cluster11019	Chr11:7777412-7777597	2.17	Down	T	Potri.011G078600	109.18	237.17
cluster11039	Chr11:7893768-7894694	3.56	Down	F	Potri.011G079500	373.66	1329.69
cluster11064	Chr11:8079186-8080141	2.62	Down	T	Potri.011G080900	11.43	29.99
cluster11099	Chr11:8319581-8320513	2.02	Down	T	Potri.011G082800	603.85	1218.6
cluster11163	Chr11:8744784-8745076	2.95	Down	F	Potri.011G084400	130.47	384.35
cluster11184	Chr11:8949960-8950383	3.44	Down	T	Potri.011G084800	23.26	79.98
cluster11185	Chr11:8950605-8950880	3.1	Down	T	Potri.011G084800	21.68	67.21
cluster11210	Chr11:9247619-9248664	2.08	Down	T	Potri.011G085300	45.33	94.42
cluster11211	Chr11:9249577-9250555	2.61	Down	T	Potri.011G085300	56.76	148.3
cluster11214	Chr11:9395473-9396520	2.15	Down	T	Potri.011G085400	44.15	94.98
cluster11215	Chr11:9397433-9398573	2.88	Down	T	Potri.011G085400	81.59	234.95
cluster11242	Chr11:9670437-9670819	3.02	Down	T	Potri.011G085700	87.11	262.72
cluster11348	Chr11:10690140-10690417	2.23	Down	T	Potri.011G088600	27.59	61.65
cluster11361	Chr11:10756790-10757259	3.67	Down	T	Potri.011G089500	238.47	875.35
cluster11387	Chr11:11077544-11078462	2.46	Down	T	Potri.011G091400	94.2	232.17
cluster11443	Chr11:11509613-11515070	2.1	Down	T	Potri.011G094700	5667.21	11882.2
cluster11472	Chr11:11720944-11721396	3.1	Down	T	Potri.011G096200	396.13	1229.16
cluster11488	Chr11:11836182-11837575	3.12	Down	T	Potri.011G097200	16.55	51.65
cluster11491	Chr11:11840969-11842403	2.08	Down	T	Potri.011G097300	160.82	333.81
cluster11492	Chr11:11842705-11842840	3.31	Down	T	Potri.011G097300	208.9	691.51
cluster11517	Chr11:12063227-12063603	2.64	Down	T	Potri.011G098900	57.55	152.19
cluster11686	Chr11:13229145-13229810	2.08	Down	T	Potri.011G108200	33.9	70.54
cluster11692	Chr11:13261170-13261702	2.39	Down	T	Potri.011G108300	38.63	92.2
cluster11727	Chr11:13546128-13546709	3.35	Down	T	Potri.011G110600	6.31	21.11
cluster11742	Chr11:13648874-13649951	2.6	Down	T	Potri.011G111600	72.13	187.18
cluster11771	Chr11:13855244-13856695	2.27	Down	T	Potri.011G113400	1041.37	2365
cluster11772	Chr11:13858499-13863217	2.6	Down	F	Potri.011G113500	2088.25	5419.85
cluster11842	Chr11:14326229-14326644	2.83	Down	F	Potri.011G117900	302.71	855.91
cluster11843	Chr11:14349797-14349968	2.52	Down	F	Potri.011G118100	141.11	356.03
cluster11931	Chr11:14920210-14920338	2.71	Down	F	Potri.011G124400	253.05	685.4
cluster11932	Chr11:14922997-14923220	2.52	Down	T	Potri.011G124400	64.64	162.74
cluster12077	Chr11:15843444-15844340	2.96	Down	T	Potri.011G134000	79.62	235.5
cluster12080	Chr11:15859005-15859783	2.27	Down	F	Potri.011G134200	83.96	190.51
cluster12088	Chr11:15903303-15903858	2.45	Down	T	Potri.011G135200	104.45	256.05
cluster12095	Chr11:15983493-15983835	3.17	Down	T	Potri.011G136000	76.47	242.17
cluster12148	Chr11:16524702-16524877	2.3	Down	T	Potri.011G145100	31.93	73.32
cluster12157	Chr11:16601448-16601963	2.29	Down	T	Potri.011G146300	83.56	191.07
cluster12190	Chr11:16911216-16911581	2.1	Down	T	Potri.011G150700	66.61	139.97
cluster12191	Chr11:16912367-16912672	2.29	Down	T	Potri.011G150700	63.07	144.41
cluster12379	Chr11:18322968-18323100	5.19	Down	T	Potri.011G167500	117.07	607.64
cluster12402	Chr12:13405-13906	2.38	Down	T	Potri.012G000300	20.1	47.77
cluster12408	Chr12:49344-50468	2.29	Down	T	Potri.012G000400	29.56	67.76
cluster12426	Chr12:180904-181188	2.68	Down	T	Potri.012G001800	70.55	188.84
cluster12433	Chr12:262583-264714	2.7	Down	T	Potri.012G003100	2240.79	6060.25
cluster12434	Chr12:265417-265698	3.8	Down	T	Potri.012G003100	41.39	157.19
cluster12443	Chr12:298614-298878	2.67	Down	T	Potri.012G003400	53.61	143.3
cluster12452	Chr12:363710-367415	2.41	Down	T	Potri.012G004100	2711.81	6532.36
cluster12500	Chr12:714644-718411	2.48	Down	T	Potri.012G008400	1130.45	2807.12
cluster12521	Chr12:880324-885540	2.7	Down	T	Potri.012G010200	2946.33	7969.81
cluster12525	Chr12:903062-904747	2.55	Down	T	Potri.012G010400	33.5	85.54
cluster12717	Chr12:2436147-2436412	4.64	Down	T	Potri.012G027900	6.7	31.1
cluster12790	Chr12:2890511-2890707	2.29	Down	F	Potri.012G032600	1866.73	4278.45
cluster12829	Chr12:3173724-3173927	3.26	Down	T	Potri.012G035600	67.01	218.28
cluster12927	Chr12:3963787-3964135	2.59	Down	T	Potri.012G043800	48.48	125.53
cluster12951	Chr12:4079947-4080115	2.15	Down	T	Potri.012G044700	33.9	72.76
cluster12999	Chr12:4429297-4429787	2.77	Down	F	Potri.012G047400	11.82	32.77
cluster13032	Chr12:4629812-4630867	2.22	Down	T	Potri.012G049100	338.98	753.16
cluster13213	Chr12:6041649-6042014	3.2	Down	F	Potri.012G058100	16.16	51.65
cluster13233	Chr12:6146833-6147245	2.32	Down	T	Potri.012G059100	18.92	43.88
cluster13344	Chr12:6948186-6949119	2.72	Down	T	Potri.012G062300	250.68	681.51
cluster13368	Chr12:7087312-7087918	2.92	Down	T	Potri.012G062600	259.75	757.6
cluster13412	Chr12:7540745-7541767	4.75	Down	T	Potri.012G063600	35.08	166.63
cluster13470	Chr12:8221259-8222111	2.59	Down	F	Potri.012G064800	55.58	143.86
cluster13516	Chr12:8583149-8584450	2.62	Down	T	Potri.012G065800	48.88	128.3
cluster13555	Chr12:9065140-9066064	2.87	Down	T	Potri.012G068200	21.28	61.1
cluster13589	Chr12:9352890-9353004	2.18	Down	T	Potri.012G069900	42.57	92.76
cluster13673	Chr12:9786952-9787112	2.42	Down	T	Potri.012G072300	170.67	413.79
cluster13717	Chr12:10103713-10103849	2.5	Down	T	Potri.012G075900	105.63	264.38
cluster13775	Chr12:10500997-10501228	2.66	Down	F	Potri.012G079100	422.54	1122.52
cluster13867	Chr12:11130889-11132502	15.61	Down	T	Potri.012G084000	4.34	67.76
cluster14076	Chr12:12539752-12540739	2.16	Down	T	Potri.012G100200	186.04	402.68
cluster14121	Chr12:12827223-12828384	2.71	Down	T	Potri.012G104000	15.77	42.77
cluster14224	Chr12:13717199-13722634	2.69	Down	T	Potri.012G116900	1953.45	5247.11
cluster14225	Chr12:13735101-13735278	2.85	Down	T	Potri.012G117000	76.07	217.17
cluster14244	Chr12:13786302-13786600	2.61	Down	T	Potri.012G117100	13.4	34.99
cluster14245	Chr12:13787722-13789171	2.57	Down	T	Potri.012G117100	343.71	884.24
cluster14293	Chr12:14198032-14202569	3.4	Down	T	Potri.012G122700	6159.51	20968.4
cluster14296	Chr12:14211646-14212595	2.97	Down	T	Potri.012G122800	14.58	43.32
cluster14304	Chr12:14301093-14303851	2.45	Down	T	Potri.012G124000	639.32	1566.86
cluster14311	Chr12:14417147-14417991	2.74	Down	F	Potri.012G125900	14.58	39.99
cluster14330	Chr12:14674706-14674899	2.59	Down	T	Potri.012G129800	35.87	92.76
cluster14336	Chr12:14776694-14776966	2.32	Down	T	Potri.012G131200	21.28	49.43
cluster14430	Chr12:15521434-15522030	2.27	Down	F	Potri.012G141900	20.1	45.54
cluster14567	Chr13:1228172-1229841	2.84	Down	T	Potri.013G018900	21.28	60.54
cluster14629	Chr13:1842193-1842353	3.07	Down	T	Potri.013G027800	77.26	237.17
cluster14636	Chr13:1892141-1892278	3.1	Down	F	Potri.013G028500	119.82	371.02
cluster14640	Chr13:1951117-1952259	2.38	Down	T	Potri.013G029600	21.68	51.65
cluster14768	Chr13:3134360-3134603	2.19	Down	T	Potri.013G044100	295.62	647.07
cluster14769	Chr13:3135069-3135676	2.16	Down	T	Potri.013G044100	43.75	94.42
cluster14781	Chr13:3237667-3237976	3.71	Down	F	Potri.013G045400	72.92	270.49
cluster14835	Chr13:3749340-3749459	2.55	Down	T	Potri.013G051200	83.56	213.28
cluster14858	Chr13:3887778-3888045	2.6	Down	T	Potri.013G052600	46.51	121.08
cluster14921	Chr13:4267673-4268117	2.08	Down	T	Potri.013G056900	70.55	146.63
cluster15033	Chr13:5001056-5001198	4.29	Down	F	Potri.013G065000	8.28	35.55
cluster15044	Chr13:5118686-5119614	4.23	Down	F	Potri.013G066500	5.52	23.33
cluster15235	Chr13:6404005-6404781	2.76	Down	T	Potri.013G074700	9.85	27.22
cluster15311	Chr13:6935011-6935308	3.48	Down	F	Potri.013G079700	18.53	64.43
cluster15312	Chr13:6935565-6936255	3.23	Down	F	Potri.013G079700	9.46	30.55
cluster15320	Chr13:7006974-7007972	8.65	Down	T	Potri.013G080300	13.8	119.42
cluster15330	Chr13:7052814-7053969	12.88	Down	T	Potri.013G080500	8.28	106.64
cluster15391	Chr13:7497871-7499026	12.88	Down	T	Potri.013G082800	8.28	106.64
cluster15414	Chr13:7671259-7671525	2.22	Down	T	Potri.013G083300	65.43	144.97
cluster15447	Chr13:7969753-7969865	3.79	Down	F	Potri.013G085000	90.66	343.25
cluster15591	Chr13:9337531-9338812	2.3	Down	T	Potri.013G089100	105.24	241.61
cluster15666	Chr13:9857164-9857771	3.03	Down	T	Potri.013G092500	24.04	72.76
cluster15679	Chr13:9918354-9921460	2.11	Down	T	Potri.013G093000	839.95	1774.03
cluster15725	Chr13:10204574-10204808	2.03	Down	T	Potri.013G094300	56.36	114.42
cluster15727	Chr13:10233399-10234888	2.19	Down	T	Potri.013G094800	50.06	109.42
cluster15735	Chr13:10304637-10304946	2.1	Down	T	Potri.013G095500	47.69	99.98
cluster15912	Chr13:11493460-11493665	2.03	Down	T	Potri.013G101700	72.53	147.19
cluster15921	Chr13:11597404-11597600	2.3	Down	F	Potri.013G102600	24.83	57.21
cluster15922	Chr13:11604793-11605942	2.83	Down	F	Potri.013G102600	38.23	108.31
cluster15939	Chr13:11753632-11753794	2.07	Down	T	Potri.013G103800	43.75	90.53
cluster15947	Chr13:11774120-11775540	15.62	Down	T	Potri.013G104100	19.31	301.6
cluster15999	Chr13:12173866-12174322	2.26	Down	T	Potri.013G108100	59.91	135.52
cluster16219	Chr13:13606367-13611167	2.23	Down	T	Potri.013G122200	2055.54	4587.26
cluster16225	Chr13:13646349-13646581	2.06	Down	T	Potri.013G122500	115.49	238.28
cluster16357	Chr13:14658294-14660819	2.19	Down	F	Potri.013G136500	538.81	1182.5
cluster16359	Chr13:14662482-14663168	2.27	Down	F	Potri.013G136600	32.72	74.43
cluster16361	Chr13:14665154-14666428	2.32	Down	F	Potri.013G136700	16.55	38.32
cluster16362	Chr13:14666589-14672655	2.6	Down	F	Potri.013G136700	2141.46	5568.7
cluster16368	Chr13:14683799-14685463	2.9	Down	F	Potri.013G137300	1161.98	3365.33
cluster16369	Chr13:14685591-14688523	2.52	Down	F	Potri.013G137400	374.45	942.56
cluster16376	Chr13:14719348-14721691	2.96	Down	F	Potri.013G137900	80.01	236.61
cluster16378	Chr13:14723383-14723708	3.21	Down	F	Potri.013G138100	144.26	463.78
cluster16379	Chr13:14724182-14725214	2.07	Down	F	Potri.013G138100	45.72	94.42
cluster16383	Chr13:14756516-14758379	3.34	Down	F	Potri.013G139100	754.42	2521.08
cluster16390	Chr13:14787624-14795728	2.41	Down	T	Potri.013G139800	57281.1	137976
cluster16392	Chr13:14797663-14798380	6.71	Down	F	Potri.013G140200	6.7	44.99
cluster16399	Chr13:14814463-14815257	3.47	Down	F	Potri.013G140500	22.07	76.65
cluster16403	Chr13:14828616-14829817	2.92	Down	F	Potri.013G141000	5191.85	15153.7
cluster16404	Chr13:14830796-14831436	3.12	Down	F	Potri.013G141000	46.12	143.86
cluster16405	Chr13:14831599-14832832	3.35	Down	F	Potri.013G141000	50.06	167.74
cluster16408	Chr13:14838352-14840176	2.39	Down	F	Potri.013G141200	430.03	1026.43
cluster16414	Chr13:14852745-14854141	17.87	Down	F	Potri.013G141800	93.02	1662.39
cluster16418	Chr13:14865740-14866418	2.13	Down	F	Potri.013G142000	560.1	1192.5
cluster16420	Chr13:14868416-14869290	2.01	Down	F	Potri.013G142100	600.7	1205.27
cluster16423	Chr13:14873008-14874397	3.45	Down	F	Potri.013G142200	39.81	137.19
cluster16426	Chr13:14881217-14882797	2.36	Down	F	Potri.013G142600	43.75	103.31
cluster16428	Chr13:14885257-14887587	2.99	Down	F	Potri.013G142800	72.53	216.62
cluster16431	Chr13:14890076-14891108	2.07	Down	F	Potri.013G143000	45.72	94.42
cluster16432	Chr13:14891591-14892849	2.24	Down	F	Potri.013G143100	51.24	114.97
cluster16513	Chr13:15551660-15552311	2.25	Down	T	Potri.013G151400	123.77	278.82
cluster16562	Chr13:15844812-15844950	2.43	Down	T	Potri.013G155700	98.93	240.5
cluster16661	Chr14:193876-194337	3.32	Down	T	Potri.014G001900	6.7	22.22
cluster16662	Chr14:194553-195537	9.42	Down	T	Potri.014G001900	1.18	11.11
cluster16663	Chr14:196221-196472	2.43	Down	T	Potri.014G001900	34.69	84.42
cluster16703	Chr14:394279-394971	2.58	Down	T	Potri.014G003200	11.43	29.44
cluster16706	Chr14:414681-415240	2.18	Down	T	Potri.014G003400	236.89	517.1
cluster16707	Chr14:415597-418984	2.27	Down	T	Potri.014G003400	452.89	1027.54
cluster16713	Chr14:432914-434068	3.56	Down	T	Potri.014G003600	6.7	23.88
cluster16763	Chr14:654593-656407	3.93	Down	T	Potri.014G005600	7.49	29.44
cluster16773	Chr14:775530-776407	3.56	Down	T	Potri.014G007600	7.49	26.66
cluster16814	Chr14:1094189-1095655	2.43	Down	T	Potri.014G010700	362.23	880.91
cluster16816	Chr14:1098811-1100780	2.06	Down	T	Potri.014G010700	235.71	486
cluster16847	Chr14:1240626-1241503	3.56	Down	T	Potri.014G012000	7.49	26.66
cluster16884	Chr14:1728283-1728799	2.51	Down	T	Potri.014G018200	30.35	76.09
cluster16886	Chr14:1741298-1741470	2.27	Down	T	Potri.014G018500	48.48	109.97
cluster16935	Chr14:2123634-2123886	2.13	Down	T	Potri.014G024800	46.51	98.87
cluster17016	Chr14:2746158-2747501	2.47	Down	T	Potri.014G033500	15.77	38.88
cluster17099	Chr14:3347749-3348920	2.22	Down	F	Potri.014G041100	26.8	59.43
cluster17118	Chr14:3543950-3544612	2.27	Down	T	Potri.014G044400	35.47	80.54
cluster17141	Chr14:3868946-3869338	2.72	Down	T	Potri.014G048600	16172.3	44064.2
cluster17153	Chr14:3929777-3929898	2.6	Down	T	Potri.014G049000	40.99	106.64
cluster17207	Chr14:4466850-4467059	3.26	Down	T	Potri.014G057800	69.77	227.72
cluster17275	Chr14:4955642-4961096	2.18	Down	T	Potri.014G063000	5139.04	11212.4
cluster17284	Chr14:5084202-5085229	2.62	Down	T	Potri.014G063700	368.54	964.22
cluster17336	Chr14:5477743-5477913	2.1	Down	T	Potri.014G067200	119.43	251.05
cluster17373	Chr14:5837185-5837801	2.13	Down	F	Potri.014G072300	61.09	129.97
cluster17429	Chr14:6400631-6404620	2.31	Down	T	Potri.014G080100	1396.9	3230.91
cluster17509	Chr14:7088808-7089185	2.55	Down	T	Potri.014G090100	16.55	42.21
cluster17526	Chr14:7239437-7240123	2.91	Down	F	Potri.014G092700	31.53	91.65
cluster17595	Chr14:7800110-7800244	2	Down	T	Potri.014G099900	101.69	203.84
cluster17675	Chr14:8494745-8495217	2.06	Down	F	Potri.014G108100	27.2	56.1
cluster17707	Chr14:8858018-8859107	12.98	Down	T	Potri.014G113300	5.52	71.65
cluster17824	Chr14:9803929-9804151	2.36	Down	T	Potri.014G128000	72.13	169.96
cluster17830	Chr14:9845840-9847130	3.42	Down	T	Potri.014G128500	37.05	126.64
cluster17845	Chr14:10016615-10018157	2	Down	T	Potri.014G131500	325.57	652.63
cluster17881	Chr14:10280767-10281036	3.68	Down	T	Potri.014G135000	16.16	59.43
cluster17908	Chr14:10521976-10522551	2.26	Down	T	Potri.014G137600	44.54	100.53
cluster17953	Chr14:10986468-10986890	4.45	Down	T	Potri.014G143900	5.12	22.77
cluster17960	Chr14:11043100-11044154	2.82	Down	T	Potri.014G144700	95.39	268.83
cluster18001	Chr14:11407517-11409810	2.06	Down	T	Potri.014G149100	39.02	80.54
cluster18021	Chr14:11535449-11535792	2.88	Down	T	Potri.014G150300	25.62	73.87
cluster18034	Chr14:11600467-11600795	2.89	Down	T	Potri.014G150800	55.58	160.52
cluster18064	Chr14:11839336-11840316	3.07	Down	T	Potri.014G152500	60.31	184.96
cluster18065	Chr14:11840543-11841646	2.91	Down	T	Potri.014G152500	24.04	69.98
cluster18084	Chr14:11919307-11919926	2.28	Down	F	Potri.014G153100	42.17	96.09
cluster18101	Chr14:12024368-12024957	2.6	Down	T	Potri.014G154700	12.61	32.77
cluster18219	Chr14:12823671-12824898	2.89	Down	T	Potri.014G162500	59.52	172.18
cluster18229	Chr14:12885649-12886122	2.56	Down	F	Potri.014G163200	32.72	83.87
cluster18233	Chr14:12899125-12900720	4.61	Down	F	Potri.014G163500	5.91	27.22
cluster18287	Chr14:13279164-13279585	2.01	Down	T	Potri.014G167400	113.52	228.28
cluster18309	Chr14:13426626-13427776	5.73	Down	F	Potri.014G168000	12.61	72.21
cluster18368	Chr14:13984757-13985853	2.7	Down	F	Potri.014G172400	115.49	312.15
cluster18387	Chr14:14198891-14199214	3.66	Down	T	Potri.014G174900	13.8	50.54
cluster18398	Chr14:14276920-14277156	2.55	Down	F	Potri.014G175600	30.74	78.32
cluster18443	Chr14:14557696-14558051	2.24	Down	F	Potri.014G177500	141.11	315.48
cluster18536	Chr14:15150838-15152498	2.16	Down	T	Potri.014G180500	129.28	278.82
cluster18578	Chr14:15393834-15393945	3.05	Down	F	Potri.014G182200	263.69	805.37
cluster18600	Chr14:15486802-15487013	3.35	Down	F	Potri.014G182600	8.28	27.77
cluster18753	Chr14:16257707-16260113	3.05	Down	T	Potri.014G185400	212787	648387
cluster18754	Chr14:16266418-16276932	2.73	Down	T	Potri.014G185500	638378	1.74553e+06
cluster18763	Chr14:16336060-16338050	2.51	Down	T	Potri.014G185900	121.4	304.93
cluster18768	Chr14:16350265-16352337	3.05	Down	T	Potri.014G186000	171119	521698
cluster18771	Chr14:16382923-16384893	2.34	Down	T	Potri.014G186200	208147	487348
cluster18781	Chr14:16445636-16448530	2.54	Down	T	Potri.014G186600	325153	824790
cluster18864	Chr14:16985553-16986841	3.34	Down	F	Potri.014G188300	94.2	314.37
cluster19037	Chr14:18177227-18178142	2.15	Down	T	Potri.014G194200	26.41	56.65
cluster19045	Chr14:18225016-18225735	2.1	Down	T	Potri.014G194500	34.69	72.76
cluster19092	Chr14:18596500-18599784	3.29	Down	F	Potri.014G196100	919.57	3028.74
cluster19126	Chr14:18897714-18898355	2.67	Down	F	Potri.014G198400	58.73	156.63
cluster19132	Chr15:68194-70911	2.05	Down	T	Potri.015G001100	122.58	251.61
cluster19133	Chr15:73343-73693	3.37	Down	T	Potri.015G001200	26.01	87.76
cluster19137	Chr15:85053-85615	2.51	Down	T	Potri.015G001400	48.48	121.64
cluster19160	Chr15:238264-238833	3.46	Down	T	Potri.015G003100	191.96	664.29
cluster19162	Chr15:247336-247896	3.7	Down	T	Potri.015G003500	16.95	62.76
cluster19283	Chr15:1316820-1318317	2.6	Down	T	Potri.015G018300	166.73	432.68
cluster19382	Chr15:2039843-2040122	2.1	Down	T	Potri.015G026200	128.5	269.38
cluster19483	Chr15:2749396-2749605	2.62	Down	T	Potri.015G033400	65.04	170.52
cluster19599	Chr15:3606534-3607744	3.99	Down	T	Potri.015G039400	18.53	73.87
cluster19620	Chr15:3752521-3752839	2.47	Down	T	Potri.015G040500	31.53	77.76
cluster19657	Chr15:4074093-4074289	2.19	Down	T	Potri.015G043000	206.93	453.78
cluster19708	Chr15:4431822-4432979	2.07	Down	T	Potri.015G044900	115.88	239.39
cluster19829	Chr15:5252981-5254529	2.55	Down	T	Potri.015G049300	82.38	209.95
cluster19841	Chr15:5371310-5371554	2.59	Down	T	Potri.015G050200	36.26	93.87
cluster20217	Chr15:8516537-8518149	2.96	Down	T	Potri.015G062100	30.74	91.09
cluster20381	Chr15:9787323-9790116	2.4	Down	T	Potri.015G073300	214.42	515.44
cluster20425	Chr15:10030336-10032300	2.67	Down	T	Potri.015G075500	36.26	96.64
cluster20474	Chr15:10456948-10457875	2.66	Down	F	Potri.015G079500	290.89	773.15
cluster20488	Chr15:10618007-10618963	2.48	Down	T	Potri.015G081900	51.63	128.3
cluster20534	Chr15:10993743-10994322	2.89	Down	T	Potri.015G087000	70.95	204.95
cluster20550	Chr15:11100602-11100822	3.5	Down	T	Potri.015G088500	82.77	289.38
cluster20559	Chr15:11178409-11178693	2.42	Down	T	Potri.015G089300	43.75	106.09
cluster20583	Chr15:11417907-11418367	3.79	Down	T	Potri.015G092300	11.43	43.32
cluster20678	Chr15:12274435-12274894	5.23	Down	F	Potri.015G104700	2.76	14.44
cluster20680	Chr15:12281998-12282163	3.07	Down	T	Potri.015G104800	8.67	26.66
cluster20707	Chr15:12509094-12509469	2.92	Down	T	Potri.015G107700	21.28	62.21
cluster20712	Chr15:12546183-12547052	2.82	Down	T	Potri.015G108200	180.13	507.66
cluster20736	Chr15:12882217-12885639	2.11	Down	T	Potri.015G113500	1800.12	3793.56
cluster20836	Chr15:13452291-13452393	2.28	Down	F	Potri.015G119800	29.96	68.32
cluster20863	Chr15:13682019-13683143	2.87	Down	F	Potri.015G123100	19.71	56.65
cluster20866	Chr15:13693067-13693499	2.18	Down	T	Potri.015G123200	25.23	54.99
cluster20876	Chr15:13753416-13753941	2.34	Down	T	Potri.015G124000	402.44	942.56
cluster20932	Chr15:14348674-14349333	2.02	Down	T	Potri.015G133600	72.53	146.63
cluster20989	Chr15:14939123-14940689	2.55	Down	T	Potri.015G143200	55.97	142.74
cluster21038	Chr16:121880-122467	2.17	Down	T	Potri.016G002500	47.3	102.75
cluster21076	Chr16:584869-585455	2.55	Down	T	Potri.016G011300	70.95	181.07
cluster21104	Chr16:874564-875513	2.91	Down	F	Potri.016G016200	29.56	86.09
cluster21136	Chr16:1213848-1214467	2.05	Down	T	Potri.016G021900	122.19	249.94
cluster21142	Chr16:1235572-1236456	2.28	Down	T	Potri.016G022200	18.53	42.21
cluster21258	Chr16:2461441-2463818	4.05	Down	T	Potri.016G040200	7181.96	29090.4
cluster21281	Chr16:2673013-2673824	2.71	Down	T	Potri.016G043100	105.24	285.49
cluster21300	Chr16:2919212-2919773	2.08	Down	T	Potri.016G046200	118.25	245.5
cluster21399	Chr16:3735784-3735959	3.99	Down	T	Potri.016G056400	4.73	18.88
cluster21482	Chr16:4291045-4291174	2.79	Down	T	Potri.016G061500	67.01	187.18
cluster21599	Chr16:5168773-5168949	2.74	Down	T	Potri.016G070300	22.07	60.54
cluster21634	Chr16:5437640-5438521	2.25	Down	T	Potri.016G072700	93126.6	209910
cluster21653	Chr16:5565389-5565965	2.18	Down	T	Potri.016G073700	35.47	77.2
cluster21667	Chr16:5707145-5707616	3.37	Down	T	Potri.016G075700	13.01	43.88
cluster21764	Chr16:6395689-6399204	2.2	Down	T	Potri.016G082500	639.32	1406.34
cluster21785	Chr16:6488147-6488562	2.42	Down	T	Potri.016G083400	78.44	189.96
cluster21819	Chr16:6667457-6667629	2.06	Down	T	Potri.016G084900	54.39	112.2
cluster21825	Chr16:6715691-6716157	2.22	Down	T	Potri.016G085200	34.29	76.09
cluster21846	Chr16:6858237-6859563	2.41	Down	T	Potri.016G086800	17.74	42.77
cluster21889	Chr16:7276667-7277640	3.03	Down	F	Potri.016G089700	82.38	249.39
cluster21935	Chr16:7600331-7600687	2.12	Down	T	Potri.016G092100	73.71	156.63
cluster22063	Chr16:8215330-8217323	2.65	Down	F	Potri.016G094100	141.9	375.47
cluster22064	Chr16:8217481-8218459	2.18	Down	F	Potri.016G094100	361.05	787.04
cluster22135	Chr16:8970616-8971655	2.79	Down	T	Potri.016G095200	67.01	187.18
cluster22145	Chr16:9059277-9059486	2.14	Down	T	Potri.016G095700	126.92	271.05
cluster22196	Chr16:9477008-9478041	2.12	Down	F	Potri.016G098000	68.19	144.41
cluster22233	Chr16:9724582-9724869	3.23	Down	T	Potri.016G099400	63.46	204.95
cluster22249	Chr16:9847327-9847930	2.49	Down	T	Potri.016G100900	28.77	71.65
cluster22330	Chr16:10478812-10479229	4.23	Down	F	Potri.016G105000	5.91	24.99
cluster22429	Chr16:11135743-11136543	2.11	Down	T	Potri.016G108300	31.53	66.65
cluster22503	Chr16:11690753-11691278	2.05	Down	T	Potri.016G113200	247.93	508.21
cluster22592	Chr16:12368854-12369291	2.39	Down	T	Potri.016G118500	136.38	326.59
cluster22593	Chr16:12370583-12371012	2.35	Down	F	Potri.016G118500	56.76	133.3
cluster22600	Chr16:12434960-12435127	2.27	Down	T	Potri.016G119400	85.93	194.95
cluster22604	Chr16:12463905-12464200	2.16	Down	T	Potri.016G119800	39.02	84.42
cluster22622	Chr16:12610373-12610648	2.16	Down	T	Potri.016G121500	94.99	204.95
cluster22643	Chr16:12728154-12733881	3.72	Down	T	Potri.016G123400	5301.82	19733.7
cluster22728	Chr16:13303429-13304231	2.24	Down	T	Potri.016G130600	72.13	161.63
cluster22742	Chr16:13361370-13362599	2.9	Down	T	Potri.016G130900	60.7	176.07
cluster22743	Chr16:13362839-13365532	2.6	Down	T	Potri.016G130900	214.82	558.2
cluster22839	Chr16:13920692-13920934	2.09	Down	T	Potri.016G135900	43.75	91.65
cluster22887	Chr16:14327884-14329897	2.15	Down	T	Potri.016G141800	72.92	156.63
cluster22899	Chr16:14424127-14424449	2.54	Down	T	Potri.016G143600	70.95	179.96
cluster22906	Chr17:41683-42345	2.55	Down	T	Potri.017G000800	73.71	187.73
cluster22909	Chr17:73983-74272	2.71	Down	T	Potri.017G001300	36.26	98.31
cluster22926	Chr17:181112-181735	2.35	Down	T	Potri.017G003400	83.56	196.07
cluster22938	Chr17:226599-227112	2.72	Down	T	Potri.017G003900	94.99	258.83
cluster22987	Chr17:596114-597307	2.11	Down	F	Potri.017G008200	52.82	111.64
cluster22999	Chr17:647345-647803	2.12	Down	F	Potri.017G008400	27.2	57.76
cluster23004	Chr17:661939-663228	2.09	Down	F	Potri.017G008500	86.32	180.51
cluster23009	Chr17:675430-675906	2.2	Down	F	Potri.017G008600	26.8	58.88
cluster23010	Chr17:682627-683667	2.04	Down	F	Potri.017G008700	29.96	61.1
cluster23037	Chr17:784671-784958	2.34	Down	F	Potri.017G009200	17.34	40.55
cluster23038	Chr17:793507-793985	2.09	Down	F	Potri.017G009400	33.5	69.98
cluster23087	Chr17:1092025-1092496	2.31	Down	T	Potri.017G013000	36.26	83.87
cluster23137	Chr17:1574034-1574645	3.47	Down	T	Potri.017G018700	10.25	35.55
cluster23190	Chr17:1859379-1861059	2.16	Down	T	Potri.017G020900	46.9	101.09
cluster23220	Chr17:1979797-1980574	2.38	Down	T	Potri.017G022200	25.23	59.99
cluster23233	Chr17:2129744-2130334	2.24	Down	T	Potri.017G023900	26.01	58.32
cluster23263	Chr17:2257154-2257431	3.23	Down	T	Potri.017G024600	271.18	877.02
cluster23300	Chr17:2523423-2523899	2.47	Down	T	Potri.017G028200	154.9	382.13
cluster23301	Chr17:2524758-2525992	2.23	Down	T	Potri.017G028200	212.85	474.89
cluster23322	Chr17:2690407-2692088	2.41	Down	T	Potri.017G031200	143.87	346.03
cluster23323	Chr17:2692224-2694066	2.02	Down	T	Potri.017G031200	69.77	141.08
cluster23339	Chr17:2768852-2769055	3.36	Down	T	Potri.017G031900	65.04	218.28
cluster23343	Chr17:2798470-2798676	5.97	Down	F	Potri.017G032300	5.12	30.55
cluster23347	Chr17:2812778-2813126	5.9	Down	F	Potri.017G032500	6.31	37.21
cluster23349	Chr17:2821712-2822214	6.5	Down	F	Potri.017G032700	7.09	46.1
cluster23355	Chr17:2882389-2882805	3.66	Down	T	Potri.017G033600	5.91	21.66
cluster23374	Chr17:3077971-3078175	2.29	Down	T	Potri.017G036700	48.48	111.09
cluster23378	Chr17:3097806-3098429	2.02	Down	T	Potri.017G037100	34.69	69.98
cluster23385	Chr17:3140723-3140946	2.3	Down	F	Potri.017G038400	201.02	463.23
cluster23468	Chr17:3783871-3784541	2.57	Down	T	Potri.017G045200	31.53	81.09
cluster23528	Chr17:4192828-4192938	2.08	Down	T	Potri.017G050300	48.88	101.64
cluster23544	Chr17:4262319-4262917	3.32	Down	T	Potri.017G051000	42.96	142.74
cluster23552	Chr17:4305737-4306137	2.99	Down	T	Potri.017G051200	40.99	122.75
cluster23750	Chr17:5540273-5540916	2.17	Down	T	Potri.017G060000	225.46	489.33
cluster23752	Chr17:5580339-5580952	2.3	Down	T	Potri.017G060300	801.72	1846.79
cluster23781	Chr17:5744833-5744958	4.49	Down	F	Potri.017G061600	123.37	554.32
cluster23802	Chr17:5856942-5857440	3.26	Down	F	Potri.017G062700	7.49	24.44
cluster23820	Chr17:6016912-6018840	2.36	Down	T	Potri.017G063600	37.84	89.42
cluster23849	Chr17:6163453-6164782	2.59	Down	T	Potri.017G064200	16.95	43.88
cluster23935	Chr17:6948694-6950934	2.58	Down	T	Potri.017G066600	770.58	1990.09
cluster24013	Chr17:7620774-7621667	2.56	Down	F	Potri.017G068300	13.01	33.33
cluster24025	Chr17:7750285-7750412	3.3	Down	F	Potri.017G068900	5153.62	17007.7
cluster24026	Chr17:7752043-7752152	2.68	Down	F	Potri.017G068900	7350.26	19727.1
cluster24032	Chr17:7772889-7773012	3.59	Down	F	Potri.017G069000	1049.64	3770.79
cluster24063	Chr17:8056931-8058066	2.55	Down	T	Potri.017G070300	106.82	272.16
cluster24068	Chr17:8096211-8096763	2.57	Down	T	Potri.017G070600	18.13	46.66
cluster24120	Chr17:8421666-8421957	2.5	Down	F	Potri.017G072700	15.77	39.44
cluster24162	Chr17:8696297-8696732	3.1	Down	F	Potri.017G074500	53.21	164.96
cluster24247	Chr17:9398108-9398672	2.19	Down	T	Potri.017G080100	283.79	621.52
cluster24248	Chr17:9398874-9399243	3.8	Down	T	Potri.017G080100	78.44	297.71
cluster24249	Chr17:9399455-9402265	2.23	Down	T	Potri.017G080100	538.03	1200.28
cluster24617	Chr17:12174435-12174754	2.15	Down	T	Potri.017G104700	25.62	54.99
cluster24659	Chr17:12526173-12527007	2.63	Down	T	Potri.017G109200	67.01	176.07
cluster24669	Chr17:12605518-12605864	2.12	Down	T	Potri.017G110500	85.93	182.18
cluster24672	Chr17:12615018-12615118	3.74	Down	T	Potri.017G110600	10.25	38.32
cluster24695	Chr17:12794875-12795059	2.65	Down	T	Potri.017G112200	149.78	397.13
cluster24727	Chr17:13012961-13013153	3.24	Down	F	Potri.017G114600	20.89	67.76
cluster24728	Chr17:13013934-13014322	3.7	Down	F	Potri.017G114600	86.32	319.37
cluster24744	Chr17:13094826-13095122	2.64	Down	T	Potri.017G115800	12.61	33.33
cluster24794	Chr17:13606130-13607006	2.08	Down	T	Potri.017G123600	106.42	221.61
cluster24796	Chr17:13609020-13609238	2.5	Down	T	Potri.017G123700	46.9	117.19
cluster24834	Chr17:13904255-13904800	2.76	Down	T	Potri.017G127400	97.75	269.38
cluster24835	Chr17:13905805-13906760	2.13	Down	T	Potri.017G127400	180.52	384.91
cluster24853	Chr17:14066751-14066915	2.02	Down	T	Potri.017G129800	150.17	303.26
cluster24869	Chr17:14242122-14243114	2.17	Down	F	Potri.017G132100	69.37	150.52
cluster24889	Chr17:14386567-14387842	2.28	Down	F	Potri.017G134400	71.74	163.85
cluster24896	Chr17:14486758-14487115	2.62	Down	T	Potri.017G136300	84.35	221.06
cluster24897	Chr17:14487914-14488159	2.55	Down	T	Potri.017G136300	130.86	333.81
cluster24924	Chr17:14799006-14801594	2.06	Down	T	Potri.017G140100	2431.96	5006.61
cluster24929	Chr17:14834865-14836529	2.66	Down	F	Potri.017G140600	10.64	28.33
cluster24930	Chr17:14838726-14840102	2.79	Down	F	Potri.017G140700	104.85	292.15
cluster24975	Chr17:15300057-15300626	2.01	Down	T	Potri.017G145200	29.56	59.43
cluster24976	Chr17:15301176-15301476	2.4	Down	T	Potri.017G145200	33.5	80.54
cluster24980	Chr17:15328892-15329082	2.83	Down	T	Potri.017G145600	147.81	417.68
cluster25045	Chr17:15763733-15764987	2.34	Down	T	Potri.017G151500	482.45	1128.63
cluster25046	Chr17:15765125-15765925	2.36	Down	T	Potri.017G151500	408.35	965.33
cluster25052	Chr17:15816333-15818519	2	Down	T	Potri.017G152000	1122.56	2246.14
cluster25088	Chr18:12090-13830	2.06	Down	F	Potri.018G000200	489.15	1006.99
cluster25187	Chr18:744641-745740	2.22	Down	F	Potri.018G010300	23.26	51.65
cluster25213	Chr18:899360-900252	2.34	Down	F	Potri.018G011900	18.53	43.32
cluster25224	Chr18:973514-974350	19.86	Down	T	Potri.018G012700	8.28	164.41
cluster25324	Chr18:1830271-1830485	2.58	Down	T	Potri.018G022800	52.03	134.41
cluster25325	Chr18:1859180-1859355	3.29	Down	T	Potri.018G023200	89.08	293.26
cluster25486	Chr18:3017260-3017731	2.59	Down	T	Potri.018G036800	14.58	37.77
cluster25630	Chr18:4018845-4019929	2.91	Down	T	Potri.018G044200	44.15	128.3
cluster25803	Chr18:5179856-5180859	2.13	Down	T	Potri.018G050400	32.32	68.87
cluster25804	Chr18:5181771-5182880	2.86	Down	T	Potri.018G050400	77.65	222.17
cluster25805	Chr18:5183401-5184899	2.56	Down	T	Potri.018G050400	176.98	453.78
cluster25830	Chr18:5337066-5338269	4.23	Down	T	Potri.018G051400	13.4	56.65
cluster25867	Chr18:5569062-5569772	5.79	Down	F	Potri.018G053400	3.55	20.55
cluster25884	Chr18:5682527-5682892	2.18	Down	T	Potri.018G054000	20.1	43.88
cluster25898	Chr18:5763320-5763617	2.02	Down	T	Potri.018G054800	65.04	131.08
cluster25931	Chr18:6091863-6092748	2.53	Down	T	Potri.018G057600	328.33	832.03
cluster26174	Chr18:8068386-8068755	2.33	Down	F	Potri.018G063900	29.56	68.87
cluster26229	Chr18:8539371-8540589	2.37	Down	T	Potri.018G067100	35.08	83.31
cluster26323	Chr18:9161234-9161930	2.48	Down	T	Potri.018G071300	14.98	37.21
cluster26458	Chr18:10420423-10421775	2.68	Down	T	Potri.018G078600	67.4	180.51
cluster26473	Chr18:10476379-10477991	2.47	Down	T	Potri.018G079100	28.77	71.09
cluster26624	Chr18:11580801-11581996	6.29	Down	F	Potri.018G088500	10.25	64.43
cluster26634	Chr18:11614345-11615503	6.01	Down	F	Potri.018G088600	10.25	61.65
cluster26642	Chr18:11665865-11666663	3.26	Down	T	Potri.018G089000	28.77	93.87
cluster26644	Chr18:11670179-11672177	2.06	Down	T	Potri.018G089100	52.03	107.2
cluster26654	Chr18:11698168-11699324	6.01	Down	F	Potri.018G089200	10.25	61.65
cluster26659	Chr18:11723409-11724342	6.57	Down	F	Potri.018G089300	8.28	54.43
cluster26664	Chr18:11737926-11739073	6.07	Down	F	Potri.018G089400	10.25	62.21
cluster26699	Chr18:11965232-11965793	4.47	Down	T	Potri.018G090600	54.79	244.94
cluster26762	Chr18:12398515-12398927	2.22	Down	T	Potri.018G095500	361.44	800.92
cluster26782	Chr18:12598889-12603916	2.24	Down	T	Potri.018G097600	264.87	593.75
cluster26835	Chr18:12974883-12976185	2.05	Down	T	Potri.018G102300	124.95	256.61
cluster26837	Chr18:12978428-12979561	2.01	Down	F	Potri.018G102300	68.19	137.19
cluster26940	Chr18:13989113-13989233	2.32	Down	F	Potri.018G115200	134.41	311.59
cluster26941	Chr18:13990805-13991078	2.38	Down	F	Potri.018G115200	85.93	204.4
cluster26942	Chr18:13993161-13993432	2.63	Down	F	Potri.018G115200	217.18	571.53
cluster26959	Chr18:14149592-14153847	2.06	Down	T	Potri.018G117200	3461.1	7116.67
cluster27065	Chr18:15333803-15333952	2.5	Down	T	Potri.018G132500	149.78	373.8
cluster27072	Chr18:15422436-15422586	2.24	Down	T	Potri.018G134300	104.06	233.28
cluster27081	Chr18:15451351-15452714	2.98	Down	T	Potri.018G134600	48.88	145.52
cluster27092	Chr18:15507861-15513717	3.39	Down	T	Potri.018G135400	7574.54	25679
cluster27143	Chr18:15800202-15800879	2.72	Down	T	Potri.018G138300	63.46	172.74
cluster27230	Chr18:16448062-16448866	2.9	Down	F	Potri.018G144700	13.8	39.99
cluster27237	Chr18:16466544-16467582	2.3	Down	F	Potri.018G144800	21.28	48.88
cluster27247	Chr18:16658237-16659364	2.56	Down	F	Potri.018G148000	16.95	43.32
cluster27249	Chr18:16688682-16689316	2.49	Down	T	Potri.018G148400	33.5	83.31
cluster27276	Chr19:33715-37590	2.23	Down	T	Potri.019G000200	873.06	1945.1
cluster27313	Chr19:275350-275547	2.43	Down	T	Potri.019G002200	21.28	51.65
cluster27317	Chr19:293783-294211	2.05	Down	T	Potri.019G002500	78.44	160.52
cluster27326	Chr19:338225-338401	3.33	Down	T	Potri.019G003000	23.65	78.87
cluster27353	Chr19:523656-524673	2.82	Down	T	Potri.019G004900	10.25	28.88
cluster27356	Chr19:557528-559370	2.03	Down	T	Potri.019G005200	636.57	1295.25
cluster27366	Chr19:613600-614520	2.23	Down	T	Potri.019G005500	53.61	119.42
cluster27367	Chr19:614904-616440	2.64	Down	T	Potri.019G005500	43.75	115.53
cluster27403	Chr19:879245-880324	4.09	Down	F	Potri.019G007400	50.06	204.95
cluster27404	Chr19:896201-896566	3.88	Down	F	Potri.019G007700	48.09	186.62
cluster27495	Chr19:1390766-1391845	4.05	Down	F	Potri.019G011400	49.66	201.06
cluster27514	Chr19:1520245-1520412	2.65	Down	F	Potri.019G013700	60.31	159.96
cluster27588	Chr19:1926781-1929015	2.27	Down	F	Potri.019G016800	67.01	152.19
cluster27600	Chr19:1993223-1993812	2.13	Down	T	Potri.019G017400	373.66	797.59
cluster27650	Chr19:2311141-2311256	4.15	Down	T	Potri.019G020100	21.28	88.31
cluster27731	Chr19:2803071-2803257	2.64	Down	T	Potri.019G024400	21.28	56.1
cluster27793	Chr19:3100462-3101593	3.15	Down	T	Potri.019G027000	6.7	21.11
cluster27819	Chr19:3190084-3191710	3.35	Down	F	Potri.019G027900	39.81	133.3
cluster27822	Chr19:3203464-3204684	2.08	Down	F	Potri.019G028600	39.81	82.76
cluster27914	Chr19:3822281-3823192	3.21	Down	F	Potri.019G033500	81.2	261.05
cluster27951	Chr19:4084601-4085027	4.16	Down	T	Potri.019G036200	7.88	32.77
cluster27966	Chr19:4189360-4190901	3.84	Down	T	Potri.019G037000	56.76	217.73
cluster28065	Chr19:4776788-4777312	3.91	Down	F	Potri.019G041200	42.57	166.63
cluster28104	Chr19:5085689-5086948	2.78	Down	T	Potri.019G043500	43.75	121.64
cluster28110	Chr19:5138203-5138533	2.97	Down	T	Potri.019G043800	41.39	122.75
cluster28298	Chr19:6690541-6691808	2.94	Down	T	Potri.019G047500	246.74	724.83
cluster28434	Chr19:7794710-7794980	2.63	Down	T	Potri.019G051600	50.85	133.86
cluster28469	Chr19:8021527-8021968	2.25	Down	T	Potri.019G052600	50.85	114.42
cluster28493	Chr19:8278645-8279084	2.01	Down	T	Potri.019G053900	54.79	109.97
cluster28500	Chr19:8387302-8389963	2.2	Down	T	Potri.019G054400	332.67	732.05
cluster28501	Chr19:8391269-8391627	2.43	Down	T	Potri.019G054400	21.28	51.65
cluster28543	Chr19:8898652-8898975	2.67	Down	T	Potri.019G057400	128.89	344.36
cluster28590	Chr19:9171713-9175949	2.11	Down	T	Potri.019G059900	2747.28	5795.31
cluster28632	Chr19:9344366-9344632	2.33	Down	T	Potri.019G060900	20.5	47.77
cluster28654	Chr19:9567981-9568904	2.34	Down	F	Potri.019G063300	287.34	673.18
cluster28658	Chr19:9590059-9590395	2.49	Down	T	Potri.019G063400	73.31	182.74
cluster28670	Chr19:9678958-9679472	2.53	Down	T	Potri.019G064100	99.72	252.72
cluster28690	Chr19:9782297-9783110	2.12	Down	T	Potri.019G064900	33.5	71.09
cluster28707	Chr19:9937668-9939657	2.07	Down	T	Potri.019G066900	50.06	103.86
cluster28769	Chr19:10336357-10338057	2.08	Down	T	Potri.019G069900	51.63	107.2
cluster28770	Chr19:10340119-10341366	2.15	Down	T	Potri.019G069900	94.99	203.84
cluster28772	Chr19:10379097-10379220	2.17	Down	T	Potri.019G070500	24.04	52.21
cluster28853	Chr19:10915712-10916237	2.53	Down	T	Potri.019G075000	212.85	539.32
cluster28862	Chr19:10943341-10943870	2.44	Down	T	Potri.019G075300	185.65	452.67
cluster28890	Chr19:11194178-11195495	3.56	Down	T	Potri.019G078200	36.66	130.53
cluster28916	Chr19:11352516-11353234	2.63	Down	T	Potri.019G079600	40.6	106.64
cluster28995	Chr19:11932981-11933178	2.36	Down	F	Potri.019G087600	87.5	206.62
cluster29056	Chr19:12322258-12322683	2.1	Down	T	Potri.019G092700	32.72	68.87
cluster29085	Chr19:12474536-12475246	4.09	Down	T	Potri.019G094400	54.79	223.84
cluster29141	Chr19:12735010-12735576	2.42	Down	F	Potri.019G096400	25.23	61.1
cluster29148	Chr19:12839574-12840376	2.48	Down	T	Potri.019G098500	14.98	37.21
cluster29150	Chr19:12841756-12843622	2.43	Down	T	Potri.019G098500	38.23	92.76
cluster29197	Chr19:13377467-13377909	4.78	Down	F	Potri.019G105400	16.95	81.09
cluster29200	Chr19:13406378-13406761	3.42	Down	F	Potri.019G105700	18.53	63.32
cluster29201	Chr19:13416326-13416804	2.79	Down	F	Potri.019G105900	20.5	57.21
cluster29206	Chr19:13447097-13447226	2.63	Down	F	Potri.019G106200	11.82	31.1
cluster29216	Chr19:13513506-13513938	3.22	Down	F	Potri.019G106600	22.07	71.09
cluster29233	Chr19:13618796-13619212	2.84	Down	F	Potri.019G107700	28.38	80.54
cluster29236	Chr19:13633253-13633807	2.74	Down	F	Potri.019G107800	20.89	57.21
cluster29237	Chr19:13643433-13643800	2.66	Down	F	Potri.019G108000	13.8	36.66
cluster29239	Chr19:13659908-13660301	3.6	Down	F	Potri.019G108200	14.19	51.1
cluster29252	Chr19:13779764-13780116	2.04	Down	T	Potri.019G109400	71.74	146.63
cluster29284	Chr19:13922120-13923071	2.72	Down	F	Potri.019G110200	11.43	31.1
cluster29290	Chr19:13960681-13961815	2.13	Down	F	Potri.019G110400	62.67	133.3
cluster29316	Chr19:14183338-14184068	2.77	Down	F	Potri.019G113200	37.84	104.98
cluster29322	Chr19:14257213-14262396	2.67	Down	F	Potri.019G114400	120.22	321.04
cluster29464	Chr19:15307648-15308083	2.58	Down	T	Potri.019G125900	126.92	327.15
cluster29497	Chr19:15513946-15514113	2.38	Down	F	Potri.019G128700	303.5	723.72
cluster29527	Chr19:15742628-15742899	2.69	Down	T	Potri.019G131800	64.64	173.85
cluster29557	Chr19:15940203-15940950	2.91	Down	F	Potri.019G134000	50.06	145.52
cluster10	Chr1:22650-23367	3.95	Down	T	intergenic	24.04	94.98
cluster10002	Chr11:942006-943337	2.09	Down	T	intergenic	150.96	315.48
cluster10003	Chr11:945465-947898	2.45	Down	T	intergenic	62.28	152.74
cluster10006	Chr11:951576-953367	2.21	Down	T	intergenic	53.21	117.75
cluster10007	Chr11:961225-961954	3.13	Down	F	intergenic	177.77	557.09
cluster10008	Chr11:964374-964702	2.61	Down	T	intergenic	28.77	74.98
cluster10011	Chr11:978355-979062	4.23	Down	T	intergenic	52.82	223.28
cluster10014	Chr11:983688-984925	2.41	Down	T	intergenic	43.75	105.53
cluster1002	Chr1:7733229-7734062	3.48	Down	T	intergenic	17.74	61.65
cluster10020	Chr11:1013367-1018568	2.91	Down	T	intergenic	2556.12	7445.48
cluster10021	Chr11:1025486-1027376	2.1	Down	T	intergenic	251.08	526.54
cluster10027	Chr11:1073110-1073799	2.44	Down	T	intergenic	67.4	164.41
cluster10029	Chr11:1099920-1100258	2.46	Down	T	intergenic	106.82	263.27
cluster10030	Chr11:1112936-1115805	2.26	Down	T	intergenic	67.8	153.3
cluster10031	Chr11:1116033-1117755	3.49	Down	T	intergenic	52.42	182.74
cluster1004	Chr1:7746925-7747618	2.12	Down	T	intergenic	87.9	186.62
cluster10040	Chr11:1159353-1159716	2.32	Down	T	intergenic	47.69	110.53
cluster10041	Chr11:1164762-1165183	2.08	Down	T	intergenic	96.17	199.95
cluster10044	Chr11:1183419-1184205	2.26	Down	T	intergenic	194.32	438.79
cluster10045	Chr11:1188132-1188887	2.37	Down	T	intergenic	253.05	600.97
cluster10048	Chr11:1193958-1195167	2.94	Down	T	intergenic	44.15	129.97
cluster10052	Chr11:1227016-1227644	3.52	Down	F	intergenic	22.86	80.54
cluster10053	Chr11:1236860-1237056	2.08	Down	T	intergenic	58.34	121.08
cluster10054	Chr11:1253747-1253921	3.06	Down	T	intergenic	77.26	236.61
cluster10055	Chr11:1256243-1256609	2.04	Down	T	intergenic	43.36	88.31
cluster10056	Chr11:1264861-1266455	2.1	Down	T	intergenic	489.94	1026.98
cluster10057	Chr11:1267041-1268801	2.18	Down	T	intergenic	1599.49	3493.63
cluster10058	Chr11:1277080-1277484	2.25	Down	T	intergenic	86.71	195.51
cluster10059	Chr11:1278098-1278259	2.05	Down	T	intergenic	57.55	117.75
cluster1006	Chr1:7750304-7750467	2.91	Down	T	intergenic	103.66	302.15
cluster10060	Chr11:1281682-1281945	4.39	Down	T	intergenic	48.48	212.73
cluster10062	Chr11:1298855-1299473	2.24	Down	T	intergenic	328.73	737.05
cluster10063	Chr11:1305469-1305760	2.65	Down	T	intergenic	754.42	1997.87
cluster10066	Chr11:1347224-1349060	2.83	Down	T	intergenic	438.3	1241.38
cluster10067	Chr11:1358507-1359004	2.1	Down	T	intergenic	126.92	266.6
cluster10068	Chr11:1359204-1359752	3.97	Down	T	intergenic	11.04	43.88
cluster10070	Chr11:1360950-1363014	2.26	Down	T	intergenic	351.98	797.04
cluster10080	Chr11:1409541-1410083	2.7	Down	F	intergenic	203.78	549.32
cluster10082	Chr11:1423173-1423797	2.82	Down	F	intergenic	202.99	572.09
cluster10083	Chr11:1424745-1426581	2.99	Down	T	intergenic	407.17	1215.83
cluster10092	Chr11:1453514-1454032	2.25	Down	T	intergenic	126.52	284.38
cluster10099	Chr11:1478371-1478514	2.29	Down	T	intergenic	112.34	257.72
cluster101	Chr1:886117-886416	2.6	Down	T	intergenic	17.74	46.1
cluster10101	Chr11:1484325-1484978	16.4	Down	T	intergenic	3.15	51.65
cluster10105	Chr11:1503032-1504021	2.41	Down	T	intergenic	123.77	297.71
cluster10107	Chr11:1513212-1514343	2.16	Down	T	intergenic	26.01	56.1
cluster10109	Chr11:1520040-1520266	2.6	Down	F	intergenic	12.61	32.77
cluster1011	Chr1:7780333-7780891	2.82	Down	F	intergenic	25.62	72.21
cluster10112	Chr11:1536918-1538865	2.13	Down	T	intergenic	27.59	58.88
cluster10113	Chr11:1539402-1540807	2.75	Down	T	intergenic	22.86	62.76
cluster10114	Chr11:1551555-1553849	2.01	Down	T	intergenic	201.02	403.79
cluster10116	Chr11:1587330-1587779	2.48	Down	T	intergenic	13.01	32.21
cluster10118	Chr11:1596027-1597246	3.18	Down	T	intergenic	298.77	949.78
cluster10120	Chr11:1607894-1608998	2.1	Down	T	intergenic	229.79	483.22
cluster10122	Chr11:1609919-1610467	4.47	Down	T	intergenic	9.07	40.55
cluster10124	Chr11:1611701-1613753	2.28	Down	T	intergenic	346.47	789.26
cluster10127	Chr11:1624635-1625113	2.08	Down	T	intergenic	66.61	138.86
cluster10130	Chr11:1633279-1634048	3.27	Down	T	intergenic	11.04	36.1
cluster10136	Chr11:1649568-1651304	2.51	Down	T	intergenic	751.66	1885.12
cluster1014	Chr1:7815842-7816155	3.16	Down	F	intergenic	184.86	584.31
cluster10140	Chr11:1667736-1668366	2.26	Down	T	intergenic	144.26	326.59
cluster10156	Chr11:1747438-1747575	2.67	Down	T	intergenic	257.39	687.62
cluster10157	Chr11:1747863-1749138	2.09	Down	T	intergenic	162.39	339.92
cluster10158	Chr11:1750244-1750494	2.03	Down	T	intergenic	92.63	187.73
cluster10160	Chr11:1764846-1765274	2.55	Down	T	intergenic	12.61	32.21
cluster10166	Chr11:1791021-1791520	2.63	Down	F	intergenic	14.58	38.32
cluster10170	Chr11:1827485-1828571	2.02	Down	T	intergenic	54.39	109.97
cluster10173	Chr11:1833586-1834688	2.46	Down	T	intergenic	33.9	83.31
cluster10176	Chr11:1839469-1839959	3.8	Down	T	intergenic	5.12	19.44
cluster10178	Chr11:1861362-1861843	2.15	Down	T	intergenic	21.68	46.66
cluster1018	Chr1:7848275-7848669	2.41	Down	T	intergenic	35.47	85.54
cluster10185	Chr11:1914344-1914611	3.34	Down	T	intergenic	38.23	127.75
cluster10194	Chr11:1984798-1985128	2.27	Down	T	intergenic	48.88	111.09
cluster10196	Chr11:2057409-2057820	2.64	Down	T	intergenic	100.12	264.38
cluster102	Chr1:887367-887760	2.75	Down	T	intergenic	74.89	206.06
cluster1020	Chr1:7851303-7851498	3.58	Down	T	intergenic	5.12	18.33
cluster10201	Chr11:2077700-2079550	2.17	Down	T	intergenic	59.52	129.41
cluster10206	Chr11:2121303-2121769	2.88	Down	T	intergenic	132.83	382.69
cluster1021	Chr1:7858935-7859160	2.24	Down	T	intergenic	18.13	40.55
cluster10210	Chr11:2139191-2139640	2.31	Down	T	intergenic	111.94	258.27
cluster10213	Chr11:2159927-2160675	2.87	Down	F	intergenic	186.44	535.43
cluster10216	Chr11:2168669-2169368	4.85	Down	T	intergenic	3.55	17.22
cluster10217	Chr11:2170857-2172293	4.93	Down	T	intergenic	6.31	31.1
cluster10219	Chr11:2179623-2180597	2.5	Down	T	intergenic	47.69	119.42
cluster10220	Chr11:2181177-2181365	2.18	Down	F	intergenic	21.68	47.21
cluster10226	Chr11:2224180-2224454	3.26	Down	T	intergenic	7.49	24.44
cluster10227	Chr11:2228445-2229037	2.02	Down	T	intergenic	91.84	185.51
cluster10228	Chr11:2229788-2230755	2.39	Down	T	intergenic	68.19	162.74
cluster10232	Chr11:2260907-2261739	2.61	Down	F	intergenic	37.45	97.75
cluster10235	Chr11:2312711-2313885	2.5	Down	T	intergenic	13.8	34.44
cluster10238	Chr11:2347111-2347381	2.34	Down	F	intergenic	50.06	117.19
cluster10239	Chr11:2352080-2352232	2.13	Down	T	intergenic	41.78	88.87
cluster10242	Chr11:2392140-2392854	2.12	Down	T	intergenic	82.38	174.4
cluster10246	Chr11:2412399-2412661	2.15	Down	T	intergenic	67.4	144.97
cluster10247	Chr11:2412881-2413374	2.47	Down	T	intergenic	25.23	62.21
cluster10248	Chr11:2413411-2414371	2.5	Down	T	intergenic	109.18	272.71
cluster10254	Chr11:2479580-2480677	2.8	Down	T	intergenic	178.95	501.55
cluster10255	Chr11:2486955-2487214	2.1	Down	T	intergenic	27.2	57.21
cluster10256	Chr11:2488855-2490084	2.6	Down	T	intergenic	1073.69	2792.68
cluster10257	Chr11:2503663-2504343	2.33	Down	T	intergenic	66.22	154.41
cluster10258	Chr11:2504592-2504952	2.28	Down	T	intergenic	52.03	118.86
cluster10265	Chr11:2560266-2560900	2.43	Down	T	intergenic	136.38	331.03
cluster10272	Chr11:2646583-2647267	2.41	Down	T	intergenic	53.21	128.3
cluster10275	Chr11:2653079-2653933	2.43	Down	T	intergenic	83.56	202.73
cluster10276	Chr11:2666151-2666312	2.92	Down	T	intergenic	10.64	31.1
cluster1028	Chr1:7913716-7914000	2.55	Down	T	intergenic	69.77	177.74
cluster10283	Chr11:2728092-2728428	3.52	Down	T	intergenic	8.67	30.55
cluster10286	Chr11:2744333-2744727	2.39	Down	T	intergenic	15.37	36.66
cluster10287	Chr11:2745498-2745844	2.87	Down	T	intergenic	33.5	96.09
cluster10291	Chr11:2763589-2764432	2.79	Down	F	intergenic	246.74	689.28
cluster10292	Chr11:2764885-2765905	2.96	Down	F	intergenic	19.31	57.21
cluster10293	Chr11:2771189-2772118	2.75	Down	T	intergenic	267.24	735.38
cluster10299	Chr11:2809528-2810740	2.28	Down	T	intergenic	33.9	77.2
cluster10306	Chr11:2860623-2861149	2.28	Down	T	intergenic	164.76	375.47
cluster10308	Chr11:2867856-2868646	2.55	Down	T	intergenic	32.72	83.31
cluster10309	Chr11:2881571-2882646	2.16	Down	T	intergenic	146.63	317.15
cluster10311	Chr11:2886914-2887447	2.28	Down	F	intergenic	51.63	117.75
cluster10313	Chr11:2905589-2906497	2.15	Down	T	intergenic	42.96	92.2
cluster10314	Chr11:2912916-2913904	2.82	Down	T	intergenic	23.26	65.54
cluster10316	Chr11:2919619-2920135	2.37	Down	F	intergenic	147.42	349.92
cluster10317	Chr11:2935090-2935986	2.1	Down	T	intergenic	284.19	598.19
cluster10326	Chr11:2986238-2990752	2.48	Down	T	intergenic	1673.6	4152.92
cluster10327	Chr11:2995402-2995900	2.75	Down	T	intergenic	121.4	333.81
cluster1033	Chr1:7938651-7939533	2.83	Down	T	intergenic	78.04	221.06
cluster10332	Chr11:3039113-3044439	2.87	Down	T	intergenic	3055.51	8754.62
cluster10337	Chr11:3065023-3065408	2.23	Down	F	intergenic	18.92	42.21
cluster10344	Chr11:3104579-3104876	4.83	Down	T	intergenic	5.52	26.66
cluster10345	Chr11:3107675-3107780	2.62	Down	F	intergenic	30.74	80.54
cluster10347	Chr11:3112961-3113999	4.42	Down	T	intergenic	346.47	1530.2
cluster10352	Chr11:3152532-3153930	2.09	Down	T	intergenic	218.76	457.12
cluster10353	Chr11:3154229-3155831	2.26	Down	T	intergenic	2872.63	6498.48
cluster10356	Chr11:3170549-3171194	3.76	Down	F	intergenic	8.28	31.1
cluster10359	Chr11:3212685-3215200	2.11	Down	T	intergenic	746.14	1571.86
cluster10360	Chr11:3222632-3228878	3.37	Down	T	intergenic	7789.36	26274.4
cluster10364	Chr11:3247915-3248730	2.05	Down	T	intergenic	37.45	76.65
cluster10365	Chr11:3252208-3252520	3.27	Down	T	intergenic	44.54	145.52
cluster10366	Chr11:3253345-3253949	2.74	Down	T	intergenic	153.72	421.01
cluster10367	Chr11:3261914-3268861	3.38	Down	T	intergenic	8468.88	28657.8
cluster10368	Chr11:3269167-3270651	2.62	Down	T	intergenic	782.4	2049.52
cluster10374	Chr11:3314638-3315123	3.13	Down	T	intergenic	16.16	50.54
cluster10375	Chr11:3320462-3322795	2.51	Down	T	intergenic	240.04	602.64
cluster10378	Chr11:3342101-3342234	3.5	Down	T	intergenic	14.58	51.1
cluster10379	Chr11:3352397-3352911	2.17	Down	T	intergenic	165.55	358.81
cluster10380	Chr11:3354068-3354407	2.25	Down	T	intergenic	24.44	54.99
cluster10384	Chr11:3390616-3390844	2.95	Down	T	intergenic	13.01	38.32
cluster10385	Chr11:3393739-3394017	3.99	Down	T	intergenic	68.98	274.94
cluster10389	Chr11:3429707-3429949	2.39	Down	T	intergenic	27.2	64.98
cluster10390	Chr11:3433404-3433896	2.94	Down	T	intergenic	9.07	26.66
cluster10392	Chr11:3439044-3439872	2.15	Down	T	intergenic	98.15	211.06
cluster10395	Chr11:3443413-3443631	2.43	Down	T	intergenic	22.86	55.54
cluster10404	Chr11:3477298-3477825	2.54	Down	T	intergenic	38.63	98.31
cluster10409	Chr11:3499254-3500522	2.06	Down	T	intergenic	69.77	143.86
cluster1041	Chr1:7983945-7984146	2.71	Down	T	intergenic	36.66	99.42
cluster10413	Chr11:3531400-3531676	2.77	Down	T	intergenic	137.96	381.58
cluster10415	Chr11:3539807-3540062	2.33	Down	T	intergenic	42.17	98.31
cluster10417	Chr11:3541667-3541857	2.76	Down	T	intergenic	18.92	52.21
cluster10418	Chr11:3544507-3545563	2.25	Down	T	intergenic	100.51	226.06
cluster10422	Chr11:3554514-3554679	2.94	Down	T	intergenic	74.1	217.73
cluster10423	Chr11:3567979-3568150	2.28	Down	T	intergenic	48.09	109.42
cluster10428	Chr11:3606497-3607132	2.05	Down	T	intergenic	100.12	204.95
cluster1043	Chr1:7994081-7995317	2.21	Down	T	intergenic	31.93	70.54
cluster10430	Chr11:3609318-3609449	2.61	Down	T	intergenic	40.6	106.09
cluster10437	Chr11:3669009-3669604	2.26	Down	T	intergenic	20.89	47.21
cluster1044	Chr1:7998497-7998876	2.28	Down	T	intergenic	35.08	79.98
cluster10441	Chr11:3704440-3704833	2.53	Down	F	intergenic	26.8	67.76
cluster10442	Chr11:3708552-3709242	2.34	Down	T	intergenic	60.7	142.19
cluster10443	Chr11:3733433-3733578	2.6	Down	F	intergenic	17.74	46.1
cluster10445	Chr11:3738264-3738494	2.51	Down	T	intergenic	126.13	316.59
cluster10449	Chr11:3792319-3792486	2.66	Down	T	intergenic	17.74	47.21
cluster1045	Chr1:7999152-7999882	2.4	Down	T	intergenic	14.58	34.99
cluster10451	Chr11:3799213-3799394	2.03	Down	T	intergenic	106.82	217.17
cluster10452	Chr11:3802236-3802404	2.59	Down	T	intergenic	71.74	185.51
cluster10455	Chr11:3810567-3810782	2.22	Down	T	intergenic	28.77	63.87
cluster1046	Chr1:8003704-8003879	3.27	Down	T	intergenic	73.31	239.94
cluster10461	Chr11:3842034-3842254	2.58	Down	T	intergenic	16.16	41.66
cluster10465	Chr11:3876181-3876441	2.01	Down	T	intergenic	55.18	111.09
cluster10468	Chr11:3889248-3889535	3.5	Down	F	intergenic	22.86	79.98
cluster10469	Chr11:3900143-3900269	2.21	Down	T	intergenic	132.83	293.26
cluster10470	Chr11:3903218-3903620	2.56	Down	T	intergenic	33.9	86.65
cluster10474	Chr11:3923349-3924020	2.12	Down	T	intergenic	35.08	74.43
cluster10475	Chr11:3941392-3941851	3.06	Down	T	intergenic	31.93	97.75
cluster10476	Chr11:3943289-3944403	2.27	Down	T	intergenic	72.53	164.96
cluster10478	Chr11:3946051-3946687	7.06	Down	F	intergenic	1.18	8.33
cluster10480	Chr11:3960013-3963381	2.02	Down	T	intergenic	53.61	108.31
cluster10484	Chr11:3979231-3979690	2.43	Down	T	intergenic	70.16	170.52
cluster10487	Chr11:3994486-3995004	2.5	Down	T	intergenic	54.39	136.08
cluster10490	Chr11:4007836-4008041	2.36	Down	T	intergenic	170.28	402.68
cluster10492	Chr11:4015240-4015466	2.3	Down	T	intergenic	135.98	313.26
cluster10495	Chr11:4051706-4051823	2.24	Down	T	intergenic	35.47	79.43
cluster10497	Chr11:4079847-4081386	2.34	Down	T	intergenic	38.23	89.42
cluster10499	Chr11:4105397-4105617	2.57	Down	T	intergenic	55.18	141.63
cluster105	Chr1:902811-903773	2.95	Down	F	intergenic	12.22	36.1
cluster10504	Chr11:4138776-4139397	2.3	Down	T	intergenic	51.63	118.86
cluster10507	Chr11:4145351-4146248	3.09	Down	T	intergenic	92.63	286.6
cluster10508	Chr11:4148760-4149588	3.08	Down	T	intergenic	23.65	72.76
cluster10509	Chr11:4157834-4158999	2.51	Down	T	intergenic	122.58	307.71
cluster10512	Chr11:4163668-4163949	3.19	Down	T	intergenic	97.75	312.15
cluster10513	Chr11:4170123-4171159	2.04	Down	T	intergenic	160.03	327.15
cluster10516	Chr11:4176683-4177509	2.01	Down	T	intergenic	63.85	128.3
cluster10519	Chr11:4185119-4190416	2.28	Down	T	intergenic	1694.09	3863.54
cluster10520	Chr11:4191777-4193157	2.21	Down	T	intergenic	38.23	84.42
cluster10521	Chr11:4199110-4199638	3.35	Down	T	intergenic	9.46	31.66
cluster10527	Chr11:4254713-4256241	2.87	Down	T	intergenic	33.9	97.2
cluster10530	Chr11:4281509-4282224	4.13	Down	T	intergenic	3247.86	13421.9
cluster10535	Chr11:4317830-4318289	2.64	Down	T	intergenic	21.68	57.21
cluster10536	Chr11:4319155-4319434	3.13	Down	T	intergenic	26.41	82.76
cluster10538	Chr11:4362913-4363678	2.2	Down	T	intergenic	52.82	116.08
cluster10539	Chr11:4369810-4370023	2.95	Down	T	intergenic	17.34	51.1
cluster10545	Chr11:4401986-4402568	2.93	Down	T	intergenic	9.85	28.88
cluster10546	Chr11:4403076-4403676	2.36	Down	T	intergenic	124.95	295.49
cluster10549	Chr11:4438486-4438606	3.19	Down	T	intergenic	28.38	90.53
cluster10553	Chr11:4451824-4452095	2.36	Down	T	intergenic	268.42	634.3
cluster10554	Chr11:4462408-4462634	2.42	Down	T	intergenic	60.7	147.19
cluster10559	Chr11:4514723-4515280	3.07	Down	T	intergenic	51.24	157.19
cluster10560	Chr11:4517284-4517454	2.02	Down	T	intergenic	74.1	149.97
cluster10563	Chr11:4521561-4522584	2.76	Down	T	intergenic	296.01	816.48
cluster10564	Chr11:4524265-4524872	2.16	Down	F	intergenic	73.71	158.85
cluster10565	Chr11:4525082-4525888	2.67	Down	T	intergenic	11.43	30.55
cluster10571	Chr11:4581803-4582025	2.15	Down	T	intergenic	33.9	72.76
cluster10574	Chr11:4591031-4591311	2.15	Down	T	intergenic	41.78	89.98
cluster10575	Chr11:4594955-4595231	2.47	Down	T	intergenic	1009.83	2493.31
cluster10576	Chr11:4597436-4597902	2.47	Down	T	intergenic	81.59	201.62
cluster10577	Chr11:4601233-4601732	2.35	Down	T	intergenic	120.61	283.82
cluster10580	Chr11:4625920-4626510	2.87	Down	T	intergenic	11.82	33.88
cluster10584	Chr11:4662840-4663126	2.7	Down	T	intergenic	47.3	127.75
cluster10585	Chr11:4664119-4664268	2.58	Down	T	intergenic	20.89	53.88
cluster10587	Chr11:4681203-4682012	5.64	Down	T	intergenic	5.91	33.33
cluster10590	Chr11:4705262-4706369	3.43	Down	T	intergenic	14.58	49.99
cluster10591	Chr11:4707135-4707724	2.14	Down	T	intergenic	24.44	52.21
cluster10594	Chr11:4727233-4728397	2.26	Down	T	intergenic	91.05	205.51
cluster10599	Chr11:4763193-4763744	3.09	Down	T	intergenic	35.08	108.31
cluster106	Chr1:924462-925049	2.12	Down	T	intergenic	85.53	181.07
cluster10600	Chr11:4769440-4770064	3.37	Down	T	intergenic	42.17	142.19
cluster10601	Chr11:4770693-4773945	2.01	Down	T	intergenic	165.15	331.59
cluster10604	Chr11:4787016-4787725	2.53	Down	F	intergenic	145.05	367.14
cluster10612	Chr11:4875740-4876547	2.59	Down	T	intergenic	16.95	43.88
cluster10618	Chr11:4894302-4895384	2.15	Down	T	intergenic	99.33	213.28
cluster10620	Chr11:4903525-4903830	2.07	Down	T	intergenic	111.94	231.61
cluster10621	Chr11:4904586-4904861	2.52	Down	T	intergenic	39.42	99.42
cluster1063	Chr1:8142792-8143171	2.59	Down	F	intergenic	134.01	346.59
cluster10635	Chr11:5000558-5000695	2.19	Down	T	intergenic	22.86	49.99
cluster10645	Chr11:5050068-5050798	2.22	Down	T	intergenic	40.6	89.98
cluster10649	Chr11:5068269-5068459	2.06	Down	F	intergenic	174.22	359.36
cluster1065	Chr1:8154650-8155035	3.88	Down	F	intergenic	300.74	1167.51
cluster10653	Chr11:5101487-5103353	2.79	Down	T	intergenic	57.15	159.41
cluster10654	Chr11:5122501-5122610	2.9	Down	T	intergenic	13.8	39.99
cluster10655	Chr11:5123755-5124051	2.6	Down	T	intergenic	13.01	33.88
cluster10657	Chr11:5132474-5133260	2.82	Down	T	intergenic	17.74	49.99
cluster10658	Chr11:5170266-5170945	2.18	Down	T	intergenic	72.53	158.3
cluster10664	Chr11:5252077-5252249	2.43	Down	T	intergenic	245.17	595.42
cluster10669	Chr11:5278559-5278861	2.82	Down	T	intergenic	44.93	126.64
cluster10691	Chr11:5429078-5429903	5.1	Down	T	intergenic	5.12	26.11
cluster10699	Chr11:5547002-5547474	2	Down	T	intergenic	64.64	129.41
cluster107	Chr1:927659-928475	3.02	Down	T	intergenic	22.47	67.76
cluster10700	Chr11:5548513-5548680	2.84	Down	T	intergenic	26.41	74.98
cluster10705	Chr11:5573562-5577718	2.42	Down	T	intergenic	81.59	197.73
cluster10714	Chr11:5631930-5632697	2.02	Down	T	intergenic	35.47	71.65
cluster10715	Chr11:5633902-5634096	2.13	Down	T	intergenic	29.17	62.21
cluster10723	Chr11:5668326-5669118	39.87	Down	T	intergenic	0.39	15.55
cluster10728	Chr11:5680372-5681315	5.31	Down	T	intergenic	6.7	35.55
cluster10729	Chr11:5682868-5683560	2.45	Down	T	intergenic	34.29	83.87
cluster10733	Chr11:5707799-5708747	3.17	Down	T	intergenic	11.04	34.99
cluster10738	Chr11:5733962-5734653	6.36	Down	T	intergenic	25.23	160.52
cluster10739	Chr11:5735044-5736042	3.75	Down	T	intergenic	36.26	136.08
cluster10742	Chr11:5801681-5802050	2.39	Down	T	intergenic	15.37	36.66
cluster10743	Chr11:5810122-5810291	2.31	Down	T	intergenic	152.93	353.25
cluster10747	Chr11:5864215-5864384	2.38	Down	T	intergenic	20.1	47.77
cluster10748	Chr11:5882088-5882272	2.45	Down	T	intergenic	41.78	102.2
cluster10749	Chr11:5894953-5895252	2.04	Down	T	intergenic	31.93	64.98
cluster10750	Chr11:5897274-5897695	2.24	Down	T	intergenic	81.2	182.18
cluster10752	Chr11:5913505-5913657	3.72	Down	F	intergenic	5.52	20.55
cluster10753	Chr11:5925909-5926028	3.06	Down	T	intergenic	74.5	227.72
cluster10756	Chr11:5932647-5933593	3.07	Down	T	intergenic	11.04	33.88
cluster10760	Chr11:5990540-5990715	2.75	Down	T	intergenic	23.26	63.87
cluster10762	Chr11:6001352-6001553	2.7	Down	T	intergenic	45.72	123.3
cluster10765	Chr11:6012706-6013441	2.43	Down	T	intergenic	120.61	292.71
cluster10772	Chr11:6036466-6036760	2.53	Down	T	intergenic	41.78	105.53
cluster10777	Chr11:6066857-6067475	5.88	Down	T	intergenic	7.09	41.66
cluster10778	Chr11:6067754-6068437	2.41	Down	T	intergenic	31.53	76.09
cluster10781	Chr11:6080891-6081876	3.64	Down	T	intergenic	4.73	17.22
cluster10791	Chr11:6185472-6186103	2.12	Down	T	intergenic	32.72	69.43
cluster10794	Chr11:6207895-6208433	2.53	Down	T	intergenic	71.34	180.51
cluster10795	Chr11:6208667-6208942	2.65	Down	T	intergenic	53.21	141.08
cluster10796	Chr11:6209239-6210014	2.31	Down	T	intergenic	91.44	211.62
cluster10799	Chr11:6224214-6226176	2.91	Down	T	intergenic	69.37	202.18
cluster1080	Chr1:8287600-8288677	2.8	Down	T	intergenic	140.71	393.8
cluster10802	Chr11:6240333-6240435	2.08	Down	T	intergenic	54.39	113.31
cluster10804	Chr11:6264465-6264643	3.11	Down	T	intergenic	28.77	89.42
cluster10806	Chr11:6285116-6285397	2.18	Down	T	intergenic	40.2	87.76
cluster10808	Chr11:6312471-6312646	3.82	Down	T	intergenic	61.09	233.28
cluster10809	Chr11:6312776-6313084	3.63	Down	T	intergenic	59.91	217.73
cluster1081	Chr1:8288961-8289173	2.87	Down	F	intergenic	121.4	348.81
cluster10812	Chr11:6340845-6341284	2.09	Down	T	intergenic	92.63	193.29
cluster10813	Chr11:6343449-6343704	2.05	Down	T	intergenic	68.98	141.63
cluster10817	Chr11:6361125-6361462	2.4	Down	T	intergenic	53.61	128.86
cluster10819	Chr11:6393471-6393762	2.29	Down	T	intergenic	80.8	184.96
cluster10821	Chr11:6404669-6405569	2.71	Down	T	intergenic	493.49	1339.69
cluster10822	Chr11:6409245-6410152	2.82	Down	T	intergenic	9.46	26.66
cluster10829	Chr11:6492130-6492335	3.25	Down	T	intergenic	42.96	139.41
cluster10830	Chr11:6509019-6509369	2.6	Down	F	intergenic	18.13	47.21
cluster10835	Chr11:6547910-6548493	2.35	Down	T	intergenic	111.94	262.72
cluster10842	Chr11:6605751-6606526	3.25	Down	T	intergenic	26.01	84.42
cluster10845	Chr11:6622125-6623165	2.2	Down	T	intergenic	50.85	111.64
cluster10846	Chr11:6630128-6630378	3.59	Down	F	intergenic	111.55	400.46
cluster10847	Chr11:6650476-6651175	2.87	Down	T	intergenic	340.55	976.44
cluster10849	Chr11:6677258-6677864	2.56	Down	T	intergenic	52.03	133.3
cluster10850	Chr11:6678459-6681744	2.31	Down	T	intergenic	107.61	248.28
cluster10852	Chr11:6684438-6685543	8.94	Down	T	intergenic	2.36	21.11
cluster10853	Chr11:6693377-6694833	2.74	Down	T	intergenic	65.82	180.51
cluster10859	Chr11:6722247-6722790	2.09	Down	T	intergenic	44.15	92.2
cluster1086	Chr1:8381447-8381651	2.07	Down	T	intergenic	82.38	170.52
cluster10862	Chr11:6740157-6740346	2.93	Down	T	intergenic	48.09	141.08
cluster10871	Chr11:6840153-6840924	2.26	Down	T	intergenic	57.15	129.41
cluster10872	Chr11:6842581-6843403	2.18	Down	T	intergenic	89.87	196.07
cluster10877	Chr11:6872256-6872802	2.67	Down	T	intergenic	18.92	50.54
cluster10879	Chr11:6874818-6875574	2.23	Down	T	intergenic	53.21	118.86
cluster1088	Chr1:8388107-8389189	5.64	Down	T	intergenic	8.28	46.66
cluster10882	Chr11:6880303-6880733	2.41	Down	T	intergenic	16.16	38.88
cluster10884	Chr11:6893306-6894041	6.97	Down	T	intergenic	7.49	52.21
cluster10889	Chr11:6912292-6913498	4.84	Down	T	intergenic	17.34	83.87
cluster10896	Chr11:6976773-6976950	2.76	Down	T	intergenic	20.5	56.65
cluster10897	Chr11:6980614-6981278	2.47	Down	T	intergenic	72.53	178.85
cluster109	Chr1:968763-971133	2.56	Down	T	intergenic	350.8	899.23
cluster1090	Chr1:8419615-8419947	3.79	Down	T	intergenic	25.62	97.2
cluster10900	Chr11:7004349-7005894	2.09	Down	T	intergenic	175.4	366.58
cluster10904	Chr11:7037463-7040513	2.15	Down	T	intergenic	222.7	479.89
cluster1091	Chr1:8422804-8423256	2.46	Down	T	intergenic	49.27	121.08
cluster10912	Chr11:7053680-7054493	3.82	Down	T	intergenic	9.46	36.1
cluster10913	Chr11:7056042-7057466	4.79	Down	T	intergenic	5.91	28.33
cluster10915	Chr11:7058753-7059768	2.12	Down	T	intergenic	149.39	316.04
cluster10916	Chr11:7061130-7062062	2.95	Down	T	intergenic	12.22	36.1
cluster10917	Chr11:7076556-7076715	2.59	Down	T	intergenic	46.9	121.64
cluster10921	Chr11:7093207-7093881	2.1	Down	T	intergenic	91.84	193.29
cluster10924	Chr11:7131570-7132325	2.58	Down	T	intergenic	29.96	77.2
cluster10926	Chr11:7161106-7166415	2.65	Down	T	intergenic	3046.84	8065.34
cluster10928	Chr11:7182237-7183295	3.69	Down	T	intergenic	48.88	180.51
cluster10935	Chr11:7211348-7212140	2.3	Down	T	intergenic	217.18	499.33
cluster10938	Chr11:7220538-7227434	2.43	Down	T	intergenic	2314.5	5624.24
cluster10946	Chr11:7267590-7268693	3.5	Down	T	intergenic	9.85	34.44
cluster10951	Chr11:7289275-7291796	3.16	Down	T	intergenic	82.38	260.49
cluster10953	Chr11:7294943-7300447	2.83	Down	T	intergenic	98.54	278.82
cluster10956	Chr11:7311599-7312570	2.57	Down	T	intergenic	40.6	104.42
cluster10959	Chr11:7351707-7351962	2.19	Down	T	intergenic	33.5	73.32
cluster10962	Chr11:7368322-7369788	2.08	Down	T	intergenic	201.81	419.35
cluster10963	Chr11:7373880-7374086	2.3	Down	T	intergenic	266.45	612.63
cluster10968	Chr11:7438655-7438772	2.02	Down	T	intergenic	58.34	117.75
cluster10970	Chr11:7443392-7443547	2.88	Down	T	intergenic	76.86	221.61
cluster10971	Chr11:7449502-7450389	2.42	Down	T	intergenic	13.8	33.33
cluster10973	Chr11:7463835-7464201	3.66	Down	T	intergenic	13.8	50.54
cluster10974	Chr11:7464884-7465072	2.98	Down	T	intergenic	290.49	865.35
cluster10977	Chr11:7471909-7472648	2.77	Down	T	intergenic	74.1	204.95
cluster1098	Chr1:8458065-8458410	2.74	Down	T	intergenic	140.32	384.91
cluster10987	Chr11:7544125-7544375	2.32	Down	T	intergenic	89.47	207.73
cluster10988	Chr11:7546373-7546665	2.87	Down	T	intergenic	50.06	143.86
cluster1099	Chr1:8459466-8459659	2.46	Down	T	intergenic	18.53	45.54
cluster10996	Chr11:7590090-7590498	2.76	Down	F	intergenic	27.59	76.09
cluster11	Chr1:30335-31403	2.2	Down	T	intergenic	23.26	51.1
cluster11000	Chr11:7613939-7614243	2.11	Down	T	intergenic	104.06	219.39
cluster11003	Chr11:7661785-7662835	2.79	Down	T	intergenic	38.63	107.75
cluster11005	Chr11:7667703-7668211	2.17	Down	T	intergenic	67.01	145.52
cluster11010	Chr11:7701394-7702373	2.57	Down	T	intergenic	22.07	56.65
cluster11011	Chr11:7702509-7704365	2.01	Down	T	intergenic	53.21	107.2
cluster11017	Chr11:7754083-7754719	2.62	Down	F	intergenic	16.95	44.43
cluster11020	Chr11:7786869-7787524	5.42	Down	F	intergenic	5.12	27.77
cluster11028	Chr11:7830989-7831214	2.42	Down	T	intergenic	40.2	97.2
cluster11036	Chr11:7864891-7865077	2.98	Down	T	intergenic	158.45	472.67
cluster1104	Chr1:8526851-8527707	3.08	Down	T	intergenic	14.98	46.1
cluster11050	Chr11:7972940-7976542	2.09	Down	T	intergenic	1197.85	2507.19
cluster11054	Chr11:7997092-7997479	2.42	Down	F	intergenic	39.42	95.53
cluster11055	Chr11:7998316-7998585	3.18	Down	F	intergenic	21.68	68.87
cluster11062	Chr11:8072379-8072770	2.74	Down	T	intergenic	149.39	409.9
cluster11063	Chr11:8076013-8077146	2.05	Down	T	intergenic	31.93	65.54
cluster11065	Chr11:8086250-8086680	2.5	Down	F	intergenic	67.01	167.74
cluster11073	Chr11:8134162-8134595	2.47	Down	T	intergenic	52.03	128.3
cluster11077	Chr11:8153241-8153818	2.02	Down	T	intergenic	70.55	142.19
cluster1108	Chr1:8551783-8552352	2.38	Down	T	intergenic	108.39	258.27
cluster11091	Chr11:8238529-8238709	2.72	Down	T	intergenic	11.43	31.1
cluster11095	Chr11:8270785-8271054	2.4	Down	T	intergenic	22.47	53.88
cluster11097	Chr11:8273123-8273897	2.03	Down	T	intergenic	44.54	90.53
cluster111	Chr1:981979-982460	3.16	Down	T	intergenic	9.85	31.1
cluster1110	Chr1:8556881-8557082	2.85	Down	T	intergenic	31.93	91.09
cluster11101	Chr11:8333805-8335352	2.21	Down	T	intergenic	86.32	191.07
cluster11104	Chr11:8350690-8350857	2.84	Down	F	intergenic	28.38	80.54
cluster11106	Chr11:8418009-8418723	2.43	Down	T	intergenic	66.61	161.63
cluster1111	Chr1:8559285-8560485	2.86	Down	T	intergenic	28.77	82.2
cluster11118	Chr11:8492664-8493994	2.71	Down	T	intergenic	31.53	85.54
cluster11119	Chr11:8495817-8496526	2.33	Down	T	intergenic	68.98	160.52
cluster11122	Chr11:8517068-8517555	2.31	Down	T	intergenic	256.2	590.97
cluster11123	Chr11:8518774-8520698	2.32	Down	T	intergenic	607.79	1411.34
cluster11133	Chr11:8584713-8585613	2.52	Down	T	intergenic	73.31	184.4
cluster11135	Chr11:8606237-8607614	2.85	Down	T	intergenic	117.07	333.26
cluster11137	Chr11:8618266-8619382	5.01	Down	T	intergenic	3.55	17.77
cluster11139	Chr11:8622756-8624019	3.06	Down	T	intergenic	27.59	84.42
cluster11142	Chr11:8630656-8631367	4.07	Down	T	intergenic	10.64	43.32
cluster11160	Chr11:8725241-8725521	2.94	Down	T	intergenic	45.33	133.3
cluster11165	Chr11:8753173-8754362	2.29	Down	T	intergenic	67.8	155.52
cluster11175	Chr11:8892428-8893039	2.51	Down	T	intergenic	62.28	156.63
cluster11177	Chr11:8900745-8901102	3.41	Down	T	intergenic	10.25	34.99
cluster11181	Chr11:8937676-8938900	2.44	Down	T	intergenic	16.16	39.44
cluster11183	Chr11:8944071-8945052	2.65	Down	T	intergenic	23.26	61.65
cluster11187	Chr11:8969452-8975186	2.28	Down	T	intergenic	1822.19	4157.36
cluster11188	Chr11:8975398-8975510	3.2	Down	T	intergenic	8.67	27.77
cluster1119	Chr1:8588987-8589420	3.84	Down	T	intergenic	24.44	93.87
cluster11193	Chr11:8985571-8986913	2.49	Down	T	intergenic	662.19	1649.06
cluster11194	Chr11:8998223-8998882	2.64	Down	T	intergenic	60.7	159.96
cluster11195	Chr11:9000130-9000704	2.41	Down	T	intergenic	2180.09	5253.22
cluster11196	Chr11:9001865-9002281	3.44	Down	T	intergenic	65.82	226.61
cluster11198	Chr11:9034039-9034746	2.13	Down	T	intergenic	53.21	113.31
cluster112	Chr1:982702-983336	2.25	Down	T	intergenic	232.55	524.32
cluster11203	Chr11:9097626-9098722	2.27	Down	T	intergenic	245.95	557.65
cluster11209	Chr11:9142295-9142568	3.03	Down	T	intergenic	15.77	47.77
cluster1121	Chr1:8628925-8630185	2.54	Down	F	intergenic	155.3	394.91
cluster11212	Chr11:9251045-9251275	3.49	Down	F	intergenic	22.47	78.32
cluster11213	Chr11:9251439-9252383	2.4	Down	F	intergenic	51.24	122.75
cluster11216	Chr11:9399461-9400476	2.46	Down	T	intergenic	146.23	359.36
cluster11218	Chr11:9422911-9423055	7.38	Down	T	intergenic	1.58	11.66
cluster11219	Chr11:9423310-9424059	6.12	Down	T	intergenic	2.36	14.44
cluster1122	Chr1:8641883-8642109	2.32	Down	T	intergenic	37.84	87.76
cluster11227	Chr11:9482306-9482744	3.19	Down	T	intergenic	145.44	463.78
cluster11229	Chr11:9518904-9519619	2.8	Down	T	intergenic	82.38	230.5
cluster11231	Chr11:9540271-9540517	3.43	Down	T	intergenic	9.07	31.1
cluster11233	Chr11:9558315-9558924	2.11	Down	T	intergenic	42.57	89.98
cluster11235	Chr11:9561460-9561967	3.64	Down	T	intergenic	9.46	34.44
cluster11265	Chr11:9843194-9844063	20.39	Down	T	intergenic	0.79	16.11
cluster11274	Chr11:10026104-10026245	2.84	Down	T	intergenic	31.93	90.53
cluster11275	Chr11:10029755-10030169	3.12	Down	T	intergenic	20.1	62.76
cluster11278	Chr11:10041027-10041434	3.11	Down	T	intergenic	11.43	35.55
cluster11287	Chr11:10058769-10060745	2.46	Down	T	intergenic	94.2	231.61
cluster11288	Chr11:10060962-10068344	2.24	Down	T	intergenic	1837.17	4115.15
cluster1129	Chr1:8710578-8710925	2.13	Down	T	intergenic	41.78	88.87
cluster11292	Chr11:10100298-10100834	3.74	Down	T	intergenic	10.25	38.32
cluster11293	Chr11:10144311-10144660	2.06	Down	F	intergenic	27.99	57.76
cluster11295	Chr11:10158380-10158737	3.6	Down	T	intergenic	460.77	1659.06
cluster11298	Chr11:10169044-10170328	2.66	Down	T	intergenic	20.89	55.54
cluster11299	Chr11:10173156-10173646	2.72	Down	T	intergenic	21.68	58.88
cluster1130	Chr1:8720507-8721120	5.01	Down	T	intergenic	7.09	35.55
cluster11310	Chr11:10221296-10222416	2.31	Down	T	intergenic	58.34	134.97
cluster11314	Chr11:10303020-10304352	2.39	Down	T	intergenic	93.81	223.84
cluster11316	Chr11:10348289-10349725	2.07	Down	T	intergenic	160.82	333.26
cluster11317	Chr11:10349992-10350421	2.19	Down	T	intergenic	57.55	126.08
cluster11323	Chr11:10489085-10489565	2.9	Down	T	intergenic	50.45	146.08
cluster11331	Chr11:10577179-10577668	2.09	Down	T	intergenic	33.5	69.98
cluster11337	Chr11:10597171-10597529	2.81	Down	T	intergenic	91.05	255.5
cluster1134	Chr1:8757459-8757675	2.34	Down	T	intergenic	146.23	342.14
cluster11343	Chr11:10648726-10649429	2.93	Down	T	intergenic	9.85	28.88
cluster11344	Chr11:10649705-10651688	3.52	Down	T	intergenic	13.4	47.21
cluster1135	Chr1:8770620-8770765	3.07	Down	T	intergenic	33.11	101.64
cluster11352	Chr11:10710893-10711135	2.44	Down	T	intergenic	23.26	56.65
cluster11355	Chr11:10715947-10717531	2.24	Down	T	intergenic	3342.07	7477.14
cluster11359	Chr11:10752271-10752506	2.03	Down	F	intergenic	25.23	51.1
cluster11364	Chr11:10829005-10829465	2.3	Down	T	intergenic	31.93	73.32
cluster11366	Chr11:10834756-10836229	2.21	Down	T	intergenic	138.74	306.6
cluster11371	Chr11:10897924-10898360	15.06	Down	T	intergenic	1.18	17.77
cluster11375	Chr11:10937512-10937792	2.76	Down	F	intergenic	69.77	192.73
cluster11377	Chr11:10946223-10946800	2.01	Down	T	intergenic	260.93	525.43
cluster11378	Chr11:10957064-10957827	2.66	Down	T	intergenic	24.83	66.1
cluster1138	Chr1:8782700-8783688	2.13	Down	T	intergenic	86.71	184.4
cluster11380	Chr11:11009635-11010012	2.06	Down	T	intergenic	117.85	243.28
cluster11382	Chr11:11013553-11015406	2.39	Down	T	intergenic	18.13	43.32
cluster11389	Chr11:11091853-11092289	17.11	Down	T	intergenic	2.76	47.21
cluster1139	Chr1:8786819-8788054	2.3	Down	T	intergenic	91.84	211.62
cluster11393	Chr11:11150353-11151340	2.28	Down	T	intergenic	55.97	127.75
cluster11395	Chr11:11153871-11154282	2.39	Down	T	intergenic	22.07	52.77
cluster11397	Chr11:11197923-11198405	4.58	Down	T	intergenic	3.15	14.44
cluster114	Chr1:986648-987676	2.22	Down	T	intergenic	2216.75	4927.18
cluster11404	Chr11:11260396-11260586	3.12	Down	T	intergenic	27.2	84.98
cluster11405	Chr11:11261343-11261477	2.46	Down	T	intergenic	42.17	103.86
cluster11416	Chr11:11353347-11354094	3.91	Down	F	intergenic	5.12	20
cluster11417	Chr11:11356260-11356487	3.52	Down	T	intergenic	7.09	24.99
cluster11421	Chr11:11380165-11380341	2.46	Down	F	intergenic	35.47	87.2
cluster11427	Chr11:11407205-11408222	2.65	Down	T	intergenic	19.71	52.21
cluster1143	Chr1:8803605-8804383	5.42	Down	T	intergenic	5.12	27.77
cluster11430	Chr11:11418227-11419804	2.28	Down	T	intergenic	24.83	56.65
cluster11439	Chr11:11502378-11502985	2.55	Down	F	intergenic	20.89	53.32
cluster11448	Chr11:11541992-11542679	3.1	Down	T	intergenic	147.42	457.12
cluster1145	Chr1:8815342-8815674	2.28	Down	T	intergenic	102.09	232.72
cluster11451	Chr11:11592878-11593643	2.73	Down	T	intergenic	190.77	520.43
cluster11452	Chr11:11594153-11594342	3.14	Down	F	intergenic	10.25	32.21
cluster11464	Chr11:11659741-11660071	3.25	Down	T	intergenic	100.12	325.48
cluster11475	Chr11:11730740-11730896	2.2	Down	T	intergenic	97.75	214.95
cluster11487	Chr11:11828321-11829505	2.84	Down	T	intergenic	124.55	353.81
cluster11489	Chr11:11838809-11839366	2.45	Down	T	intergenic	21.28	52.21
cluster1149	Chr1:8843833-8844164	2.38	Down	T	intergenic	90.66	215.51
cluster11490	Chr11:11839721-11840323	2.86	Down	T	intergenic	26.41	75.54
cluster11494	Chr11:11856166-11856817	2.33	Down	T	intergenic	111.55	259.94
cluster11495	Chr11:11857463-11858189	2.1	Down	T	intergenic	43.36	91.09
cluster11497	Chr11:11867504-11868312	3.06	Down	T	intergenic	11.43	34.99
cluster11498	Chr11:11874505-11874881	2.42	Down	T	intergenic	13.8	33.33
cluster1150	Chr1:8861947-8862658	2.66	Down	T	intergenic	17.34	46.1
cluster11500	Chr11:11880531-11881575	3.07	Down	T	intergenic	8.67	26.66
cluster11505	Chr11:11959750-11959958	2.44	Down	T	intergenic	74.89	182.74
cluster11511	Chr11:11992654-11993814	2.49	Down	T	intergenic	30.35	75.54
cluster11512	Chr11:11994415-11994975	3.49	Down	T	intergenic	24.83	86.65
cluster11514	Chr11:12021583-12021892	2.23	Down	T	intergenic	82.38	183.85
cluster11518	Chr11:12065931-12066898	4.18	Down	T	intergenic	22.86	95.53
cluster11520	Chr11:12072409-12073127	2.28	Down	T	intergenic	106.42	242.17
cluster11522	Chr11:12086074-12086915	2.05	Down	T	intergenic	30.35	62.21
cluster11525	Chr11:12105653-12105802	2.26	Down	F	intergenic	86.32	195.51
cluster11527	Chr11:12120255-12120630	2.22	Down	T	intergenic	26.8	59.43
cluster1153	Chr1:8890381-8891091	3.03	Down	T	intergenic	67.01	202.73
cluster11535	Chr11:12169363-12169681	2.09	Down	T	intergenic	48.09	100.53
cluster11536	Chr11:12170372-12170656	2.35	Down	T	intergenic	66.61	156.63
cluster11546	Chr11:12203624-12204419	4.49	Down	T	intergenic	6.31	28.33
cluster11547	Chr11:12205757-12206812	2.98	Down	T	intergenic	40.99	122.19
cluster1155	Chr1:8893004-8893210	4.83	Down	F	intergenic	29.56	142.74
cluster11552	Chr11:12231234-12231838	4.07	Down	T	intergenic	36.26	147.74
cluster11553	Chr11:12232168-12234109	2.38	Down	T	intergenic	1502.93	3576.39
cluster11556	Chr11:12265104-12265663	2.22	Down	T	intergenic	42.96	95.53
cluster11557	Chr11:12265992-12266900	2.75	Down	T	intergenic	15.37	42.21
cluster11558	Chr11:12270154-12271084	2.65	Down	T	intergenic	26.01	68.87
cluster11559	Chr11:12273173-12273362	2.64	Down	T	intergenic	15.37	40.55
cluster11564	Chr11:12310869-12311558	2.24	Down	T	intergenic	132.04	295.49
cluster11575	Chr11:12415017-12415717	3.38	Down	T	intergenic	31.53	106.64
cluster11578	Chr11:12419082-12420896	4.01	Down	T	intergenic	56.76	227.72
cluster11586	Chr11:12442744-12443177	2.09	Down	T	intergenic	39.81	83.31
cluster11588	Chr11:12445619-12445755	2.89	Down	T	intergenic	21.68	62.76
cluster11589	Chr11:12490225-12490597	3.57	Down	T	intergenic	11.04	39.44
cluster11591	Chr11:12499650-12499819	3.06	Down	F	intergenic	271.18	830.36
cluster11596	Chr11:12541205-12542412	2.1	Down	T	intergenic	169.49	356.03
cluster11597	Chr11:12552216-12552450	2.03	Down	T	intergenic	46.51	94.42
cluster11598	Chr11:12558969-12559692	2.6	Down	T	intergenic	119.82	311.59
cluster1160	Chr1:8999380-9000514	2.68	Down	T	intergenic	44.15	118.31
cluster11600	Chr11:12579631-12580109	2.88	Down	T	intergenic	11857.5	34198.7
cluster11603	Chr11:12622923-12623143	2.05	Down	T	intergenic	89.47	183.29
cluster11605	Chr11:12630451-12631715	2.14	Down	T	intergenic	112.34	239.94
cluster11606	Chr11:12639757-12640317	2.64	Down	T	intergenic	40.99	108.31
cluster11609	Chr11:12669465-12669718	2.66	Down	T	intergenic	41.39	109.97
cluster11618	Chr11:12758943-12759889	2.21	Down	T	intergenic	51.63	113.86
cluster11619	Chr11:12760700-12761720	4.23	Down	T	intergenic	8.67	36.66
cluster11621	Chr11:12770488-12771508	4.23	Down	T	intergenic	8.67	36.66
cluster11624	Chr11:12783152-12783713	3.56	Down	T	intergenic	6.7	23.88
cluster11629	Chr11:12835173-12835859	3.12	Down	T	intergenic	43.75	136.63
cluster11630	Chr11:12845289-12845781	3.04	Down	T	intergenic	175.4	533.76
cluster11632	Chr11:12854691-12855108	2.28	Down	T	intergenic	63.07	143.86
cluster11633	Chr11:12859601-12865716	2.06	Down	T	intergenic	5312.86	10940.8
cluster11635	Chr11:12873658-12874382	3.11	Down	T	intergenic	123.37	383.8
cluster11638	Chr11:12880020-12881158	2.07	Down	T	intergenic	167.12	346.59
cluster1164	Chr1:9044598-9045100	2.12	Down	T	intergenic	29.56	62.76
cluster11642	Chr11:12899763-12900114	2.35	Down	T	intergenic	16.55	38.88
cluster11643	Chr11:12914823-12915224	2.99	Down	F	intergenic	68.19	203.84
cluster11646	Chr11:12942719-12942884	2.13	Down	T	intergenic	39.81	84.98
cluster11647	Chr11:12951100-12951269	3.78	Down	T	intergenic	132.83	502.66
cluster11648	Chr11:12968763-12971898	2.46	Down	T	intergenic	1645.22	4051.28
cluster11649	Chr11:12988632-12989547	3.53	Down	T	intergenic	50.85	179.4
cluster11650	Chr11:12992220-12993272	2.04	Down	T	intergenic	217.58	444.9
cluster11653	Chr11:12998493-12999801	3.38	Down	T	intergenic	71.74	242.17
cluster11657	Chr11:13024937-13025110	3.81	Down	T	intergenic	7.88	29.99
cluster11659	Chr11:13035755-13037041	2.52	Down	F	intergenic	115.88	292.15
cluster11664	Chr11:13067905-13068316	2.86	Down	T	intergenic	13.8	39.44
cluster11665	Chr11:13068949-13069440	5.9	Down	T	intergenic	8.28	48.88
cluster11668	Chr11:13089903-13090196	2.76	Down	T	intergenic	313.75	865.35
cluster11669	Chr11:13096310-13096855	2.65	Down	T	intergenic	95.78	253.83
cluster1167	Chr1:9082310-9085999	2.05	Down	T	intergenic	847.05	1737.93
cluster11671	Chr11:13106645-13106984	2.66	Down	T	intergenic	25.23	67.21
cluster11672	Chr11:13107320-13107911	2.35	Down	T	intergenic	111.15	261.61
cluster11675	Chr11:13147258-13148139	2.34	Down	T	intergenic	481.66	1126.96
cluster11676	Chr11:13148687-13154284	2.29	Down	T	intergenic	4381.46	10037.1
cluster11677	Chr11:13167472-13168052	2.15	Down	T	intergenic	25.62	54.99
cluster1168	Chr1:9099955-9100854	2.6	Down	T	intergenic	394.55	1026.43
cluster11687	Chr11:13231482-13232868	2.25	Down	T	intergenic	623.56	1404.67
cluster11688	Chr11:13233113-13235229	2.18	Down	T	intergenic	1631.03	3550.28
cluster11690	Chr11:13241547-13241827	2.93	Down	T	intergenic	36.26	106.09
cluster11693	Chr11:13268434-13268604	2.58	Down	T	intergenic	11.43	29.44
cluster11695	Chr11:13279142-13279352	2.47	Down	T	intergenic	25.23	62.21
cluster11696	Chr11:13281466-13282502	2.77	Down	T	intergenic	12.61	34.99
cluster11697	Chr11:13307077-13307381	2.99	Down	T	intergenic	25.23	75.54
cluster1170	Chr1:9114291-9114406	2.31	Down	T	intergenic	19.71	45.54
cluster11707	Chr11:13407015-13407796	2.5	Down	T	intergenic	66.61	166.63
cluster11709	Chr11:13432732-13436784	2.07	Down	T	intergenic	162.79	337.7
cluster11711	Chr11:13463791-13463938	2.46	Down	T	intergenic	35.87	88.31
cluster11712	Chr11:13465085-13465300	3.52	Down	T	intergenic	68.19	239.94
cluster11719	Chr11:13503714-13504013	3.52	Down	T	intergenic	18.92	66.65
cluster11721	Chr11:13520948-13521125	3.35	Down	T	intergenic	51.24	171.63
cluster11728	Chr11:13554273-13554492	2.53	Down	T	intergenic	59.91	151.63
cluster11731	Chr11:13561476-13561861	3.1	Down	F	intergenic	11.82	36.66
cluster11733	Chr11:13565501-13566068	2.3	Down	T	intergenic	264.87	609.86
cluster11734	Chr11:13566692-13567305	4.38	Down	T	intergenic	51.24	224.39
cluster11735	Chr11:13568028-13568194	2.52	Down	F	intergenic	82.77	208.28
cluster11743	Chr11:13658952-13659823	2.17	Down	T	intergenic	45.72	99.42
cluster11745	Chr11:13682068-13683333	2.46	Down	T	intergenic	38.63	94.98
cluster11752	Chr11:13725725-13725990	3.01	Down	T	intergenic	46.51	139.97
cluster11754	Chr11:13734283-13734384	2.5	Down	T	intergenic	34.69	86.65
cluster11760	Chr11:13788068-13789230	2.03	Down	T	intergenic	45.33	92.2
cluster11764	Chr11:13826628-13827401	2.09	Down	F	intergenic	26.01	54.43
cluster11766	Chr11:13829327-13830255	2.26	Down	T	intergenic	36.66	82.76
cluster11768	Chr11:13837933-13839446	2.03	Down	T	intergenic	26.8	54.43
cluster11773	Chr11:13864543-13864909	2.46	Down	T	intergenic	26.01	63.87
cluster1178	Chr1:9168209-9168399	2.1	Down	T	intergenic	25.62	53.88
cluster11785	Chr11:13923346-13924126	2.12	Down	T	intergenic	53.61	113.86
cluster11786	Chr11:13925264-13928659	2.27	Down	T	intergenic	411.9	935.34
cluster1179	Chr1:9169124-9169714	2.99	Down	T	intergenic	35.08	104.98
cluster11791	Chr11:13954133-13954771	2.68	Down	T	intergenic	165.94	445.45
cluster11792	Chr11:13955578-13955958	3.43	Down	T	intergenic	46.51	159.41
cluster11798	Chr11:13995294-13997661	2.16	Down	T	intergenic	413.87	895.9
cluster11801	Chr11:14030198-14030478	2.54	Down	T	intergenic	18.13	46.1
cluster11802	Chr11:14040151-14040806	2.28	Down	T	intergenic	491.12	1120.29
cluster1181	Chr1:9182996-9183812	2.82	Down	T	intergenic	18.13	51.1
cluster11811	Chr11:14107444-14107598	2.07	Down	T	intergenic	101.3	209.95
cluster11814	Chr11:14157790-14158669	2.52	Down	T	intergenic	16.55	41.66
cluster11816	Chr11:14161571-14161984	2.84	Down	T	intergenic	154.51	438.79
cluster11818	Chr11:14171151-14171877	2.87	Down	T	intergenic	21.68	62.21
cluster11821	Chr11:14181233-14181672	2.93	Down	T	intergenic	20.1	58.88
cluster11822	Chr11:14181952-14182390	2.08	Down	T	intergenic	142.69	297.15
cluster11824	Chr11:14204452-14204814	3.01	Down	T	intergenic	77.26	232.72
cluster11827	Chr11:14225202-14226362	2.19	Down	T	intergenic	114.7	251.61
cluster11829	Chr11:14242252-14242364	2.81	Down	T	intergenic	50.06	140.52
cluster11831	Chr11:14256013-14256296	2.37	Down	T	intergenic	33.5	79.43
cluster11835	Chr11:14283227-14283723	2.22	Down	T	intergenic	26.01	57.76
cluster11845	Chr11:14368768-14368885	2.35	Down	T	intergenic	18.92	44.43
cluster11846	Chr11:14370011-14370141	3.41	Down	F	intergenic	66.22	225.5
cluster11847	Chr11:14370579-14371000	2.38	Down	T	intergenic	21.68	51.65
cluster11854	Chr11:14391728-14392025	2.16	Down	T	intergenic	92.63	200.51
cluster11855	Chr11:14392376-14392860	2.52	Down	T	intergenic	41.39	104.42
cluster11856	Chr11:14394280-14395011	2.27	Down	T	intergenic	88.69	201.06
cluster1186	Chr1:9244670-9244953	2.41	Down	T	intergenic	180.13	434.9
cluster11866	Chr11:14441755-14441888	2.43	Down	T	intergenic	40.2	97.75
cluster1187	Chr1:9247218-9247373	2.17	Down	T	intergenic	207.72	451.56
cluster11870	Chr11:14467480-14468794	3.17	Down	T	intergenic	29.96	94.98
cluster11871	Chr11:14482570-14482742	2.07	Down	T	intergenic	55.18	114.42
cluster11874	Chr11:14505712-14505938	2.05	Down	F	intergenic	28.38	58.32
cluster11880	Chr11:14555993-14556992	2.26	Down	T	intergenic	109.58	247.16
cluster11881	Chr11:14557111-14557524	2.14	Down	T	intergenic	227.82	488.22
cluster11882	Chr11:14560787-14560917	4.63	Down	T	intergenic	2.76	12.77
cluster11884	Chr11:14565083-14565410	2.16	Down	T	intergenic	225.85	487.11
cluster11885	Chr11:14578312-14578627	2.82	Down	T	intergenic	68.58	193.29
cluster11886	Chr11:14582535-14582954	2.56	Down	F	intergenic	74.5	191.07
cluster11887	Chr11:14595399-14595818	2.57	Down	F	intergenic	74.5	191.62
cluster11895	Chr11:14654378-14655062	2.76	Down	T	intergenic	10.25	28.33
cluster11896	Chr11:14656085-14657224	4.93	Down	T	intergenic	3.94	19.44
cluster11902	Chr11:14672509-14672656	2.54	Down	T	intergenic	60.31	153.3
cluster11907	Chr11:14716921-14717101	2.05	Down	T	intergenic	91.05	186.62
cluster1191	Chr1:9278498-9278958	2.57	Down	T	intergenic	575.08	1477.43
cluster1192	Chr1:9293027-9293585	2.06	Down	T	intergenic	72.13	148.85
cluster11920	Chr11:14838297-14838967	3.4	Down	T	intergenic	6.7	22.77
cluster11921	Chr11:14840884-14841318	2.94	Down	T	intergenic	203.39	597.08
cluster11928	Chr11:14915412-14916113	2.01	Down	T	intergenic	36.26	72.76
cluster11929	Chr11:14916729-14917046	2.06	Down	T	intergenic	54.79	112.75
cluster11937	Chr11:14941012-14941552	2.68	Down	T	intergenic	59.52	159.41
cluster11938	Chr11:14943034-14943826	2.2	Down	T	intergenic	21.68	47.77
cluster11939	Chr11:14955115-14955232	2.9	Down	T	intergenic	46.51	134.97
cluster11940	Chr11:14957764-14957961	2.9	Down	T	intergenic	39.42	114.42
cluster11942	Chr11:14967499-14967618	3.3	Down	T	intergenic	52.42	172.74
cluster11943	Chr11:14971640-14971860	2.36	Down	T	intergenic	84.35	199.4
cluster11948	Chr11:15026911-15027057	5.9	Down	T	intergenic	37.45	221.06
cluster11950	Chr11:15037208-15037428	2.35	Down	T	intergenic	74.5	174.96
cluster11956	Chr11:15064383-15064876	2.59	Down	F	intergenic	71.74	186.07
cluster11958	Chr11:15069053-15069259	2.92	Down	T	intergenic	154.9	452.12
cluster11959	Chr11:15076163-15076412	2.09	Down	T	intergenic	207.33	433.23
cluster11963	Chr11:15123371-15124291	2.47	Down	T	intergenic	50.06	123.86
cluster11966	Chr11:15135835-15136980	2.63	Down	T	intergenic	17.74	46.66
cluster11968	Chr11:15139017-15139523	2.89	Down	T	intergenic	49.27	142.19
cluster11971	Chr11:15173486-15174023	2.2	Down	T	intergenic	52.42	115.53
cluster11972	Chr11:15180703-15180977	2.35	Down	T	intergenic	70.55	165.52
cluster11976	Chr11:15204196-15206015	2.86	Down	T	intergenic	93.42	267.16
cluster11978	Chr11:15211383-15214807	2.26	Down	T	intergenic	195.9	442.12
cluster11980	Chr11:15229966-15230149	2.24	Down	T	intergenic	111.55	249.39
cluster11981	Chr11:15248527-15248886	2.12	Down	T	intergenic	309.02	654.85
cluster11983	Chr11:15264777-15264997	2.36	Down	T	intergenic	84.35	199.4
cluster11984	Chr11:15268901-15269020	2.31	Down	T	intergenic	21.68	49.99
cluster11989	Chr11:15285802-15285975	3.28	Down	T	intergenic	64.25	211.06
cluster1199	Chr1:9327771-9328808	2.53	Down	T	intergenic	38.23	96.64
cluster11990	Chr11:15299128-15299235	2.54	Down	T	intergenic	39.81	101.09
cluster11992	Chr11:15332364-15339826	3.3	Down	T	intergenic	7425.15	24472.1
cluster11996	Chr11:15346516-15352529	3.36	Down	T	intergenic	7438.95	24968.6
cluster11999	Chr11:15354790-15355785	2.14	Down	T	intergenic	166.73	356.58
cluster12012	Chr11:15441970-15442198	2.47	Down	T	intergenic	39.42	97.2
cluster12014	Chr11:15467532-15467826	3.19	Down	T	intergenic	89.87	286.6
cluster12015	Chr11:15468732-15469255	2.26	Down	T	intergenic	101.3	228.84
cluster12017	Chr11:15475202-15475320	2.39	Down	T	intergenic	19.31	46.1
cluster12019	Chr11:15489717-15490175	2.9	Down	T	intergenic	21.28	61.65
cluster12026	Chr11:15527098-15527307	2.78	Down	T	intergenic	14.19	39.44
cluster12029	Chr11:15549230-15551011	2.7	Down	T	intergenic	109.18	294.38
cluster12033	Chr11:15575166-15575472	2.13	Down	T	intergenic	189.59	404.35
cluster12038	Chr11:15594408-15594566	2.11	Down	T	intergenic	62.67	132.19
cluster12039	Chr11:15595066-15595322	3.33	Down	T	intergenic	63.85	212.73
cluster1205	Chr1:9358146-9358298	2.92	Down	T	intergenic	26.41	77.2
cluster12060	Chr11:15714255-15714563	2.65	Down	T	intergenic	29.96	79.43
cluster12064	Chr11:15721425-15723057	2.51	Down	T	intergenic	354.74	891.46
cluster12069	Chr11:15784042-15784931	2.58	Down	T	intergenic	21.28	54.99
cluster1207	Chr1:9393832-9394886	2.07	Down	T	intergenic	119.82	247.72
cluster12070	Chr11:15791196-15791982	2.78	Down	F	intergenic	49.27	137.19
cluster12073	Chr11:15810434-15813605	2.15	Down	T	intergenic	712.64	1535.2
cluster12078	Chr11:15848812-15849301	2.1	Down	T	intergenic	29.56	62.21
cluster12082	Chr11:15874335-15874927	5.69	Down	T	intergenic	53.61	304.93
cluster12086	Chr11:15895666-15895920	2.22	Down	T	intergenic	149.78	333.26
cluster12091	Chr11:15941709-15942092	2.33	Down	T	intergenic	90.26	209.95
cluster12092	Chr11:15953103-15953424	2.05	Down	T	intergenic	96.17	197.18
cluster12094	Chr11:15974025-15974555	2.61	Down	T	intergenic	65.04	169.96
cluster12097	Chr11:16019211-16019837	2.72	Down	T	intergenic	165.15	449.34
cluster12107	Chr11:16117976-16118200	2.37	Down	T	intergenic	116.67	276.05
cluster12109	Chr11:16143501-16144011	2.54	Down	T	intergenic	43.36	109.97
cluster12114	Chr11:16157204-16157435	2.88	Down	T	intergenic	9.46	27.22
cluster12118	Chr11:16208544-16208712	3.03	Down	F	intergenic	161.21	488.22
cluster12119	Chr11:16213148-16213640	2.63	Down	T	intergenic	1061.86	2789.35
cluster1212	Chr1:9453339-9453988	2.49	Down	T	intergenic	22.07	54.99
cluster12122	Chr11:16254393-16254501	3.43	Down	T	intergenic	86.71	297.15
cluster12123	Chr11:16289315-16289498	2.29	Down	T	intergenic	125.34	286.6
cluster12128	Chr11:16340643-16341156	2.34	Down	T	intergenic	237.28	554.87
cluster1213	Chr1:9456130-9456692	3.26	Down	T	intergenic	29.96	97.75
cluster12139	Chr11:16392280-16392964	2.06	Down	T	intergenic	63.07	129.97
cluster1215	Chr1:9464846-9465678	3.66	Down	T	intergenic	19.71	72.21
cluster12153	Chr11:16558915-16559137	2.58	Down	T	intergenic	36.66	94.42
cluster12154	Chr11:16560251-16560900	5.29	Down	T	intergenic	3.15	16.66
cluster12156	Chr11:16587291-16587450	2.09	Down	T	intergenic	57.94	121.08
cluster12159	Chr11:16612502-16613059	2.79	Down	T	intergenic	226.64	631.52
cluster1216	Chr1:9466041-9467321	2.92	Down	T	intergenic	10.64	31.1
cluster12163	Chr11:16640721-16640907	3	Down	T	intergenic	72.92	218.84
cluster12168	Chr11:16701732-16702687	2.17	Down	T	intergenic	35.87	77.76
cluster12169	Chr11:16735662-16737856	2.18	Down	T	intergenic	362.23	790.37
cluster12179	Chr11:16858033-16858515	2.86	Down	F	intergenic	14.19	40.55
cluster12180	Chr11:16864246-16864902	2.76	Down	T	intergenic	38.23	105.53
cluster12181	Chr11:16866078-16866322	3.53	Down	F	intergenic	77.26	272.71
cluster12182	Chr11:16869477-16869892	3.14	Down	T	intergenic	47.69	149.97
cluster12183	Chr11:16876090-16876292	3.11	Down	F	intergenic	61.88	192.18
cluster12188	Chr11:16891919-16893640	2.32	Down	T	intergenic	108.39	251.05
cluster12194	Chr11:16929092-16929829	3.27	Down	F	intergenic	16.16	52.77
cluster12196	Chr11:16937785-16938572	2.71	Down	T	intergenic	24.83	67.21
cluster12201	Chr11:16965262-16965497	2.85	Down	T	intergenic	34.69	98.87
cluster12204	Chr11:16978235-16978521	2.13	Down	T	intergenic	144.66	307.71
cluster12206	Chr11:16988450-16988613	2.36	Down	T	intergenic	81.59	192.18
cluster12210	Chr11:17017734-17017843	2.19	Down	T	intergenic	31.93	69.98
cluster12212	Chr11:17027646-17028632	2.45	Down	T	intergenic	13.4	32.77
cluster12213	Chr11:17028869-17029942	9.73	Down	T	intergenic	3.94	38.32
cluster12216	Chr11:17042235-17043178	2.45	Down	T	intergenic	31.93	78.32
cluster12220	Chr11:17050102-17050529	2.11	Down	T	intergenic	76.07	160.52
cluster12222	Chr11:17068793-17069320	2.15	Down	T	intergenic	83.96	180.51
cluster12231	Chr11:17157042-17157853	2.14	Down	T	intergenic	47.69	102.2
cluster12240	Chr11:17190308-17190530	2.67	Down	F	intergenic	94.6	252.72
cluster12243	Chr11:17208498-17208910	2.09	Down	T	intergenic	60.7	126.64
cluster12249	Chr11:17255674-17256312	2.48	Down	T	intergenic	34.69	86.09
cluster12256	Chr11:17316611-17317575	2.27	Down	F	intergenic	17.34	39.44
cluster1226	Chr1:9526408-9526784	2.62	Down	T	intergenic	90.26	236.61
cluster12261	Chr11:17395115-17395586	2.04	Down	T	intergenic	168.31	342.7
cluster12265	Chr11:17489637-17489782	2.07	Down	T	intergenic	98.93	204.4
cluster12268	Chr11:17520203-17521385	2.25	Down	T	intergenic	262.12	589.31
cluster12269	Chr11:17524244-17524499	2.53	Down	T	intergenic	34.69	87.76
cluster1227	Chr1:9528678-9529093	2.11	Down	T	intergenic	56.76	119.97
cluster12272	Chr11:17539827-17540711	2.03	Down	T	intergenic	31.14	63.32
cluster12279	Chr11:17590300-17592515	2.95	Down	T	intergenic	173.04	510.99
cluster12280	Chr11:17592675-17593494	2.68	Down	T	intergenic	24.83	66.65
cluster12288	Chr11:17680069-17680368	2.86	Down	T	intergenic	13.8	39.44
cluster12290	Chr11:17708473-17708747	2.64	Down	T	intergenic	44.54	117.75
cluster12292	Chr11:17732127-17733317	3.85	Down	T	intergenic	22.07	84.98
cluster12293	Chr11:17739316-17740890	2.62	Down	T	intergenic	16.95	44.43
cluster12295	Chr11:17771167-17772350	2.63	Down	T	intergenic	37.84	99.42
cluster12308	Chr11:17865722-17866285	2.5	Down	F	intergenic	227.82	570.42
cluster12313	Chr11:17874121-17875406	2.4	Down	T	intergenic	30.74	73.87
cluster12314	Chr11:17877681-17880643	2.06	Down	T	intergenic	1479.28	3041.51
cluster12315	Chr11:17881745-17885998	2.36	Down	T	intergenic	3967.99	9349.49
cluster12318	Chr11:17898492-17900068	2.82	Down	T	intergenic	11.82	33.33
cluster12319	Chr11:17914832-17915042	3.6	Down	T	intergenic	63.46	228.28
cluster12320	Chr11:17919699-17920498	2.81	Down	T	intergenic	87.11	244.94
cluster12321	Chr11:17920838-17922335	2.16	Down	T	intergenic	435.94	941.45
cluster12326	Chr11:17928098-17929973	2.01	Down	T	intergenic	44.15	88.87
cluster12327	Chr11:17930286-17932893	2.56	Down	T	intergenic	152.15	389.91
cluster12329	Chr11:17934358-17935089	2.81	Down	T	intergenic	87.11	244.94
cluster12330	Chr11:17935429-17936926	2.16	Down	T	intergenic	435.94	941.45
cluster12335	Chr11:17970454-17970718	2.34	Down	T	intergenic	61.49	143.86
cluster12337	Chr11:17973970-17974245	2.18	Down	T	intergenic	20.1	43.88
cluster12342	Chr11:18021956-18022229	2.2	Down	T	intergenic	58.73	129.41
cluster12344	Chr11:18039831-18041680	2.46	Down	T	intergenic	1315.7	3238.13
cluster1235	Chr1:9576345-9578295	2.33	Down	T	intergenic	2140.67	4989.39
cluster12356	Chr11:18126985-18127976	2.02	Down	T	intergenic	173.43	351.03
cluster12357	Chr11:18128295-18128636	2.06	Down	T	intergenic	62.67	128.86
cluster12361	Chr11:18163316-18163589	2.75	Down	T	intergenic	26.01	71.65
cluster12365	Chr11:18195417-18195643	2.19	Down	T	intergenic	115.49	253.27
cluster12366	Chr11:18196673-18197182	2.1	Down	T	intergenic	32.72	68.87
cluster12368	Chr11:18218946-18219086	2.54	Down	T	intergenic	65.43	166.07
cluster12369	Chr11:18231350-18232017	2.06	Down	T	intergenic	71.34	146.63
cluster12372	Chr11:18263135-18263494	4.99	Down	F	intergenic	92.63	462.67
cluster12383	Chr11:18350244-18350596	2.13	Down	T	intergenic	42.96	91.65
cluster12385	Chr11:18402592-18402751	2.32	Down	T	intergenic	154.9	358.81
cluster12388	Chr11:18414378-18414563	2.73	Down	T	intergenic	55.58	151.63
cluster12396	Chr11:18464952-18466592	2.6	Down	T	intergenic	157.66	409.35
cluster12399	Chr12:5721-6449	2.57	Down	T	intergenic	20.1	51.65
cluster12400	Chr12:9687-9811	2.1	Down	T	intergenic	269.6	565.98
cluster12403	Chr12:14713-15287	3.04	Down	F	intergenic	19.71	59.99
cluster12405	Chr12:29467-29621	2.29	Down	T	intergenic	80.01	183.29
cluster12410	Chr12:63006-63552	2.2	Down	T	intergenic	44.15	97.2
cluster12411	Chr12:65106-65818	3.06	Down	T	intergenic	123.77	378.8
cluster12414	Chr12:86524-86704	2.68	Down	T	intergenic	71.34	191.07
cluster12415	Chr12:87382-87611	2.1	Down	T	intergenic	92.23	193.84
cluster12420	Chr12:116783-117883	2.89	Down	T	intergenic	98.15	283.82
cluster12423	Chr12:152481-152728	2.33	Down	T	intergenic	90.26	210.51
cluster1243	Chr1:9616269-9616491	2.82	Down	T	intergenic	12.22	34.44
cluster12438	Chr12:280897-281879	2.1	Down	T	intergenic	33.9	71.09
cluster12439	Chr12:285669-286349	3.47	Down	T	intergenic	33.9	117.75
cluster12440	Chr12:286564-288119	2.49	Down	T	intergenic	91.84	228.84
cluster12442	Chr12:289650-291013	2.14	Down	T	intergenic	35.08	74.98
cluster12446	Chr12:318848-319018	2.04	Down	T	intergenic	51.24	104.42
cluster12450	Chr12:328661-330705	2.65	Down	T	intergenic	132.83	351.58
cluster12458	Chr12:430382-431694	2.5	Down	T	intergenic	166.33	416.01
cluster12459	Chr12:432833-433190	3.15	Down	T	intergenic	11.82	37.21
cluster12460	Chr12:434966-435408	2.93	Down	T	intergenic	111.15	326.04
cluster12461	Chr12:454919-455271	2.23	Down	T	intergenic	39.02	87.2
cluster12467	Chr12:497148-498301	2.61	Down	T	intergenic	15.77	41.1
cluster12476	Chr12:591539-591887	2.13	Down	T	intergenic	146.23	311.04
cluster12477	Chr12:592549-593041	2.7	Down	T	intergenic	71.74	193.84
cluster12479	Chr12:600721-600922	2.85	Down	T	intergenic	17.74	50.54
cluster12481	Chr12:625661-625902	3.75	Down	T	intergenic	22.07	82.76
cluster12487	Chr12:679426-687717	2.37	Down	T	intergenic	3690.9	8736.29
cluster12489	Chr12:696883-697595	2.21	Down	T	intergenic	258.57	570.98
cluster1249	Chr1:9654259-9655283	3.91	Down	T	intergenic	3497.76	13682.4
cluster12492	Chr12:702346-702608	2.95	Down	T	intergenic	16.95	49.99
[truncated: 13,795 more rows]

## Sheet: Table S9
Table S9 Summary of 6-Benzylaminopurine-responsive allele variation loci.
SNP	REF	ALT	CK			6-BA			Annotation
			Number of Ref	Number of Alt	Allele Level	Number of Ref	Number of Alt	Allele Level	Gene	Region
Chr01:10001297	C	T	12	6	0.333333	9	3	0.25	Potri.001G123400	UTR5
Chr01:10001309	C	T	4	9	0.692308	3	6	0.666667	Potri.001G123400	UTR5
Chr01:10010256	T	C	53	58	0.522523	32	27	0.457627	Potri.001G123500	exonic
Chr01:10010293	T	C	62	32	0.340426	29	27	0.482143	Potri.001G123500	exonic
Chr01:10010428	A	G	54	40	0.425532	31	13	0.295455	Potri.001G123500	exonic
Chr01:10010434	T	C	49	37	0.430233	28	12	0.3	Potri.001G123500	exonic
Chr01:10010759	A	G	37	7	0.159091	30	7	0.189189	Potri.001G123500	exonic
Chr01:10011082	G	A	54	13	0.19403	41	7	0.145833	Potri.001G123500	exonic
Chr01:10011083	G	T	13	49	0.790323	7	38	0.844444	Potri.001G123500	exonic
Chr01:10011304	T	C	30	19	0.387755	18	12	0.4	Potri.001G123500	exonic
Chr01:10011401	C	G	39	25	0.390625	26	15	0.365854	Potri.001G123500	exonic
Chr01:10011402	C	G	38	24	0.387097	26	15	0.365854	Potri.001G123500	exonic
Chr01:10011580	C	T	21	24	0.533333	18	11	0.37931	Potri.001G123500	exonic
Chr01:10011620	C	A	18	5	0.217391	11	11	0.5	Potri.001G123500	exonic
Chr01:10012097	C	T	62	28	0.311111	35	31	0.469697	Potri.001G123500	exonic
Chr01:10012107	T	A	24	53	0.688312	25	33	0.568966	Potri.001G123500	exonic
Chr01:10012558	T	G	4	2	0.333333	1	3	0.75	Potri.001G123500	exonic
Chr01:10012605	T	C	16	25	0.609756	11	17	0.607143	Potri.001G123500	intronic
Chr01:10015172	A	G	31	8	0.205128	31	9	0.225	Potri.001G123500	exonic
Chr01:10015262	A	G	41	9	0.18	32	6	0.157895	Potri.001G123500	exonic
Chr01:10015464	A	G	32	19	0.372549	27	14	0.341463	Potri.001G123500	exonic
Chr01:10020935	T	C	14	12	0.461538	18	3	0.142857	Potri.001G123600	exonic
Chr01:10020983	T	C	3	5	0.625	2	8	0.8	Potri.001G123600	exonic
Chr01:10036212	T	A	2	2	0.5	1	3	0.75	Potri.001G123700	exonic
Chr01:10041028	G	C	4	2	0.333333	1	2	0.666667	Potri.001G123700	intronic
Chr01:10048914	A	C	22	21	0.488372	9	6	0.4	Potri.001G123800	exonic
Chr01:10048998	A	G	23	13	0.361111	15	4	0.210526	Potri.001G123800	exonic
Chr01:10049058	T	A	22	9	0.290323	10	6	0.375	Potri.001G123800	exonic
Chr01:10049672	T	C	7	9	0.5625	1	3	0.75	Potri.001G123800	exonic
Chr01:10049843	A	G	5	18	0.782609	3	12	0.8	Potri.001G123800	exonic
Chr01:10050946	A	G	8	4	0.333333	1	2	0.666667	Potri.001G123800	exonic
Chr01:10050969	G	T	8	17	0.68	3	3	0.5	Potri.001G123800	exonic
Chr01:10051373	G	A	21	9	0.3	14	8	0.363636	Potri.001G123800	exonic
Chr01:10051427	G	T	13	19	0.59375	6	17	0.73913	Potri.001G123800	exonic
Chr01:10051886	T	C	8	5	0.384615	3	3	0.5	Potri.001G123800	intronic
Chr01:10052339	T	G	15	17	0.53125	7	9	0.5625	Potri.001G123800	exonic
Chr01:10052356	G	A	18	25	0.581395	7	12	0.631579	Potri.001G123800	exonic
Chr01:10053729	A	G	29	37	0.560606	18	27	0.6	Potri.001G123800	exonic
Chr01:10053759	C	G	33	21	0.388889	23	14	0.378378	Potri.001G123800	exonic
Chr01:10054365	A	G	28	11	0.282051	10	6	0.375	Potri.001G123800	UTR5
Chr01:10081361	A	G	8	13	0.619048	1	9	0.9	Potri.001G124000	exonic
Chr01:10081392	A	C	6	10	0.625	1	6	0.857143	Potri.001G124000	exonic
Chr01:10098517	A	T	2	5	0.714286	3	3	0.5	Potri.001G124100	UTR5
Chr01:10098550	C	T	7	16	0.695652	11	10	0.47619	Potri.001G124100	exonic
Chr01:10104091	A	G	5	7	0.583333	5	4	0.444444	Potri.001G124200	UTR3
Chr01:10105445	G	A	6	8	0.571429	5	6	0.545455	Potri.001G124200	exonic
Chr01:10105512	G	A	12	11	0.478261	10	5	0.333333	Potri.001G124200	exonic
Chr01:10105550	T	C	12	8	0.4	9	3	0.25	Potri.001G124200	exonic
Chr01:10105644	A	G	16	5	0.238095	13	4	0.235294	Potri.001G124200	exonic
Chr01:10105940	G	T	18	25	0.581395	21	18	0.461538	Potri.001G124200	exonic
Chr01:10105996	A	G	16	9	0.36	14	12	0.461538	Potri.001G124200	UTR5
Chr01:10118964	G	A	4	3	0.428571	3	2	0.4	Potri.001G124300	exonic
Chr01:10122239	A	G	45	44	0.494382	46	28	0.378378	Potri.001G124400	exonic
Chr01:10122461	C	T	14	16	0.533333	13	20	0.606061	Potri.001G124400	exonic
Chr01:10122483	T	C	25	21	0.456522	36	15	0.294118	Potri.001G124400	exonic
Chr01:10122567	G	A	21	12	0.363636	29	3	0.09375	Potri.001G124400	exonic
Chr01:10122639	G	T	17	29	0.630435	15	33	0.6875	Potri.001G124400	exonic
Chr01:10123014	C	G	11	4	0.266667	8	2	0.2	Potri.001G124400	UTR3
Chr01:10123780	C	A	4	4	0.5	1	5	0.833333	Potri.001G124500	UTR5
Chr01:10123838	T	A	9	14	0.608696	10	5	0.333333	Potri.001G124500	UTR5
Chr01:10126442	C	T	1	4	0.8	3	4	0.571429	Potri.001G124500	exonic
Chr01:10127767	T	C	20	19	0.487179	6	14	0.7	Potri.001G124500	exonic
Chr01:10127791	G	A	20	8	0.285714	12	3	0.2	Potri.001G124500	UTR3
Chr01:10127874	T	C	21	8	0.275862	11	2	0.153846	Potri.001G124500	UTR3
Chr01:101356	G	C	21	12	0.363636	10	7	0.411765	Potri.001G001300	UTR3
Chr01:101446	C	A	6	26	0.8125	6	11	0.647059	Potri.001G001300	UTR3
Chr01:101464	A	C	40	11	0.215686	21	10	0.322581	Potri.001G001300	UTR3
Chr01:101513	G	A	66	25	0.274725	35	17	0.326923	Potri.001G001300	UTR3
Chr01:101566	A	G	24	12	0.333333	13	7	0.35	Potri.001G001300	exonic
Chr01:10188008	T	A	2	3	0.6	1	4	0.8	Potri.001G125700	UTR3
Chr01:10191265	C	T	11	6	0.352941	7	4	0.363636	Potri.001G125700	exonic
Chr01:10191270	G	C	6	13	0.684211	4	8	0.666667	Potri.001G125700	exonic
Chr01:10191427	C	T	36	5	0.121951	16	7	0.304348	Potri.001G125700	exonic
Chr01:10191458	C	T	20	6	0.230769	10	7	0.411765	Potri.001G125700	exonic
Chr01:10194489	G	A	15	19	0.558824	13	6	0.315789	Potri.001G125700	exonic
Chr01:10194647	A	G	19	8	0.296296	13	5	0.277778	Potri.001G125700	UTR5
Chr01:10197859	T	C	12	8	0.4	9	3	0.25	Potri.001G125800	UTR3
Chr01:10197880	A	G	13	11	0.458333	10	3	0.230769	Potri.001G125800	UTR3
Chr01:10197941	T	C	10	13	0.565217	6	3	0.333333	Potri.001G125800	UTR3
Chr01:10198000	C	T	17	16	0.484848	5	5	0.5	Potri.001G125800	exonic
Chr01:10199342	A	G	24	15	0.384615	8	3	0.272727	Potri.001G125800	exonic
Chr01:10199393	C	T	25	13	0.342105	10	9	0.473684	Potri.001G125800	exonic
Chr01:10199470	T	C	19	37	0.660714	11	8	0.421053	Potri.001G125800	exonic
Chr01:10199534	A	G	17	36	0.679245	5	6	0.545455	Potri.001G125800	exonic
Chr01:10199647	G	A	22	20	0.47619	11	14	0.56	Potri.001G125800	exonic
Chr01:10199921	C	T	18	20	0.526316	9	9	0.5	Potri.001G125800	exonic
Chr01:10200065	A	C	21	11	0.34375	7	8	0.533333	Potri.001G125800	exonic
Chr01:10200111	T	C	12	25	0.675676	9	6	0.4	Potri.001G125800	exonic
Chr01:10240561	T	C	4	3	0.428571	3	5	0.625	Potri.001G126200	intronic
Chr01:10240603	G	A	4	4	0.5	5	3	0.375	Potri.001G126200	intronic
Chr01:10240649	A	G	4	3	0.428571	8	2	0.2	Potri.001G126200	intronic
Chr01:10240697	A	T	3	4	0.571429	1	7	0.875	Potri.001G126200	intronic
Chr01:10240770	G	A	1	3	0.75	2	3	0.6	Potri.001G126200	intronic
Chr01:10241213	T	C	5	6	0.545455	4	3	0.428571	Potri.001G126200	exonic
Chr01:10243150	C	T	7	2	0.222222	2	4	0.666667	Potri.001G126200	exonic
Chr01:10245470	T	C	5	3	0.375	1	2	0.666667	Potri.001G126200	exonic
Chr01:10263142	A	C	32	11	0.255814	22	5	0.185185	Potri.001G126400	UTR3
Chr01:10264747	A	G	32	20	0.384615	18	9	0.333333	Potri.001G126400	exonic
Chr01:10265156	A	G	8	5	0.384615	3	8	0.727273	Potri.001G126400	exonic
Chr01:10265241	A	G	26	26	0.5	21	20	0.487805	Potri.001G126400	exonic
Chr01:10265337	A	T	34	23	0.403509	19	22	0.536585	Potri.001G126400	exonic
Chr01:10265361	C	T	22	29	0.568627	19	13	0.40625	Potri.001G126400	exonic
Chr01:10265493	C	T	30	16	0.347826	9	7	0.4375	Potri.001G126400	exonic
Chr01:10265532	A	C	35	13	0.270833	17	11	0.392857	Potri.001G126400	exonic
Chr01:10265721	T	G	16	11	0.407407	11	6	0.352941	Potri.001G126400	exonic
Chr01:10266048	A	G	22	30	0.576923	10	21	0.677419	Potri.001G126400	exonic
Chr01:10269012	T	C	20	11	0.354839	25	6	0.193548	Potri.001G126500	UTR3
Chr01:10273677	A	G	27	10	0.27027	37	8	0.177778	Potri.001G126500	exonic
Chr01:10273777	G	T	5	15	0.75	8	9	0.529412	Potri.001G126500	UTR5
Chr01:1027419	T	C	3	3	0.5	3	1	0.25	Potri.001G014900	UTR5
Chr01:10305356	T	G	6	4	0.4	2	4	0.666667	Potri.001G127000	UTR5
Chr01:10306236	T	C	3	5	0.625	2	2	0.5	Potri.001G127100	exonic
Chr01:10306263	G	C	2	8	0.8	2	2	0.5	Potri.001G127100	exonic
Chr01:10306735	T	A	13	6	0.315789	8	9	0.529412	Potri.001G127100	exonic
Chr01:10306791	T	A	4	5	0.555556	6	4	0.4	Potri.001G127100	exonic
Chr01:10323234	A	G	40	18	0.310345	20	15	0.428571	Potri.001G127300	exonic
Chr01:10323308	A	G	13	40	0.754717	16	24	0.6	Potri.001G127300	exonic
Chr01:10323344	A	G	35	8	0.186047	19	9	0.321429	Potri.001G127300	exonic
Chr01:10324080	T	C	2	3	0.6	3	4	0.571429	Potri.001G127300	exonic
Chr01:10324423	G	T	13	15	0.535714	10	4	0.285714	Potri.001G127300	exonic
Chr01:10324499	A	C	41	12	0.226415	21	5	0.192308	Potri.001G127300	exonic
Chr01:10324792	T	A	3	2	0.4	1	2	0.666667	Potri.001G127300	intronic
Chr01:10324802	T	C	2	2	0.5	1	2	0.666667	Potri.001G127300	intronic
Chr01:10325196	T	A	20	28	0.583333	24	17	0.414634	Potri.001G127300	exonic
Chr01:10325336	A	G	25	22	0.468085	11	15	0.576923	Potri.001G127300	exonic
Chr01:10325343	T	C	14	23	0.621622	12	9	0.428571	Potri.001G127300	exonic
Chr01:1037594	T	C	8	5	0.384615	2	2	0.5	Potri.001G015000	UTR3
Chr01:10385335	G	A	37	8	0.177778	20	5	0.2	Potri.001G128200	exonic
Chr01:10389167	T	C	8	19	0.703704	2	6	0.75	Potri.001G128200	exonic
Chr01:10389383	C	T	35	20	0.363636	15	10	0.4	Potri.001G128200	exonic
Chr01:10389563	T	G	22	3	0.12	8	2	0.2	Potri.001G128200	exonic
Chr01:10389644	T	G	16	5	0.238095	8	4	0.333333	Potri.001G128200	exonic
Chr01:10390672	T	C	23	8	0.258065	14	6	0.3	Potri.001G128200	UTR3
Chr01:10414483	T	C	9	7	0.4375	2	2	0.5	Potri.001G128700	exonic
Chr01:10414649	T	C	2	2	0.5	1	3	0.75	Potri.001G128700	exonic
Chr01:10416093	A	G	10	9	0.473684	3	5	0.625	Potri.001G128700	exonic
Chr01:10416360	A	G	8	16	0.666667	3	8	0.727273	Potri.001G128700	exonic
Chr01:10418050	G	C	17	5	0.227273	5	4	0.444444	Potri.001G128700	exonic
Chr01:10418055	T	C	5	15	0.75	3	4	0.571429	Potri.001G128700	exonic
Chr01:10422438	G	T	12	7	0.368421	2	3	0.6	Potri.001G128800	exonic
Chr01:10429009	T	A	12	17	0.586207	7	6	0.461538	Potri.001G129000	UTR3
Chr01:10429085	T	A	12	12	0.5	6	5	0.454545	Potri.001G129000	UTR3
Chr01:10429241	A	G	14	10	0.416667	6	5	0.454545	Potri.001G129000	UTR3
Chr01:10430607	G	T	10	6	0.375	6	4	0.4	Potri.001G129000	exonic
Chr01:10430637	G	A	4	8	0.666667	2	5	0.714286	Potri.001G129000	exonic
Chr01:10430643	C	T	7	4	0.363636	5	2	0.285714	Potri.001G129000	exonic
Chr01:10431110	G	A	5	4	0.444444	3	2	0.4	Potri.001G129000	exonic
Chr01:10431148	G	A	8	6	0.428571	4	5	0.555556	Potri.001G129000	exonic
Chr01:10431193	A	T	8	12	0.6	5	5	0.5	Potri.001G129000	exonic
Chr01:10431319	T	C	10	10	0.5	3	6	0.666667	Potri.001G129000	exonic
Chr01:10431331	G	T	11	8	0.421053	2	6	0.75	Potri.001G129000	exonic
Chr01:10436221	A	G	4	6	0.6	5	5	0.5	Potri.001G129000	intronic
Chr01:10436226	G	T	3	5	0.625	5	5	0.5	Potri.001G129000	intronic
Chr01:10436285	T	C	6	6	0.5	8	2	0.2	Potri.001G129000	intronic
Chr01:10440999	G	T	27	19	0.413043	16	17	0.515152	Potri.001G129100	UTR3
Chr01:10441203	C	A	41	60	0.594059	18	29	0.617021	Potri.001G129100	exonic
Chr01:10441814	A	G	20	33	0.622642	14	17	0.548387	Potri.001G129100	exonic
Chr01:10441961	G	A	25	32	0.561404	9	15	0.625	Potri.001G129100	exonic
Chr01:10442613	A	G	33	7	0.175	17	2	0.105263	Potri.001G129100	exonic
Chr01:10442844	G	A	15	8	0.347826	13	3	0.1875	Potri.001G129100	exonic
Chr01:10442997	T	A	20	13	0.393939	13	5	0.277778	Potri.001G129100	exonic
Chr01:10443164	G	A	6	5	0.454545	7	3	0.3	Potri.001G129100	intronic
Chr01:10443644	A	G	5	9	0.642857	1	3	0.75	Potri.001G129100	exonic
Chr01:10444676	A	C	11	13	0.541667	9	9	0.5	Potri.001G129100	exonic
Chr01:10444755	C	T	27	3	0.1	10	2	0.166667	Potri.001G129100	UTR5
Chr01:10466145	G	A	40	30	0.428571	44	27	0.380282	Potri.001G129500	exonic
Chr01:10466169	C	G	24	7	0.225806	20	7	0.259259	Potri.001G129500	exonic
Chr01:10469376	A	G	11	7	0.388889	9	2	0.181818	Potri.001G129500	exonic
Chr01:10469571	T	A	6	4	0.4	6	6	0.5	Potri.001G129500	UTR3
Chr01:10473241	A	G	6	9	0.6	4	2	0.333333	Potri.001G129600	exonic
Chr01:10473865	T	A	8	5	0.384615	4	5	0.555556	Potri.001G129600	exonic
Chr01:10474619	A	G	10	5	0.333333	4	3	0.428571	Potri.001G129600	exonic
Chr01:10476635	C	T	14	10	0.416667	7	9	0.5625	Potri.001G129600	exonic
Chr01:10480162	A	T	9	6	0.4	7	8	0.533333	Potri.001G129600	exonic
Chr01:10482485	C	T	14	11	0.44	9	5	0.357143	Potri.001G129600	exonic
Chr01:10483796	G	T	2	3	0.6	1	4	0.8	Potri.001G129600	upstream
Chr01:10483878	A	T	2	4	0.666667	3	2	0.4	Potri.001G129600	upstream
Chr01:10492166	G	A	12	2	0.142857	4	2	0.333333	Potri.001G129800	exonic
Chr01:10493314	A	T	13	10	0.434783	4	5	0.555556	Potri.001G129800	UTR5
Chr01:10493528	A	C	23	10	0.30303	9	9	0.5	Potri.001G129800	UTR5
Chr01:10512854	A	C	20	3	0.130435	6	4	0.4	Potri.001G130100	exonic
Chr01:10512863	C	T	5	16	0.761905	5	7	0.583333	Potri.001G130100	exonic
Chr01:10513454	T	C	1	3	0.75	3	3	0.5	Potri.001G130100	exonic
Chr01:10516374	T	C	6	6	0.5	3	6	0.666667	Potri.001G130100	exonic
Chr01:10518005	G	A	227	44	0.162362	153	25	0.140449	Potri.001G130200	UTR3
Chr01:10518830	C	A	7	2	0.222222	1	2	0.666667	Potri.001G130200	intronic
Chr01:10522736	C	G	4	5	0.555556	2	3	0.6	Potri.001G130400	exonic
Chr01:10522780	C	T	4	3	0.428571	1	3	0.75	Potri.001G130400	exonic
Chr01:10527899	C	T	9	5	0.357143	2	7	0.777778	Potri.001G130500	exonic
Chr01:10528029	T	C	7	16	0.695652	2	12	0.857143	Potri.001G130500	exonic
Chr01:10528342	G	A	17	5	0.227273	8	5	0.384615	Potri.001G130500	exonic
Chr01:10540728	C	T	1	5	0.833333	2	4	0.666667	Potri.001G130800	exonic
Chr01:10543625	C	T	2	12	0.857143	3	9	0.75	Potri.001G130900	exonic
Chr01:105446	C	T	9	6	0.4	5	2	0.285714	Potri.001G001400	exonic
Chr01:10544602	C	T	3	4	0.571429	2	4	0.666667	Potri.001G130900	exonic
Chr01:10547166	A	C	17	9	0.346154	14	11	0.44	Potri.001G130900	exonic
Chr01:10550364	T	C	2	2	0.5	1	2	0.666667	Potri.001G131000	UTR5
Chr01:10550365	G	C	2	2	0.5	1	2	0.666667	Potri.001G131000	UTR5
Chr01:10550465	T	C	23	3	0.115385	14	2	0.125	Potri.001G131000	exonic
Chr01:10551300	G	C	78	50	0.390625	27	29	0.517857	Potri.001G131000	exonic
Chr01:10551729	T	C	11	104	0.904348	7	33	0.825	Potri.001G131000	UTR3
Chr01:10551751	G	C	103	11	0.0964912	32	7	0.179487	Potri.001G131000	UTR3
Chr01:10556567	A	G	80	40	0.333333	50	22	0.305556	Potri.001G131300	exonic
Chr01:10556624	G	A	99	47	0.321918	51	24	0.32	Potri.001G131300	exonic
Chr01:10556689	T	C	64	70	0.522388	30	30	0.5	Potri.001G131300	exonic
Chr01:10556695	C	T	66	60	0.47619	29	26	0.472727	Potri.001G131300	exonic
Chr01:10556891	C	T	23	26	0.530612	9	8	0.470588	Potri.001G131300	exonic
Chr01:10557659	C	T	8	7	0.466667	9	4	0.307692	Potri.001G131300	exonic
Chr01:10557665	T	G	10	10	0.5	4	13	0.764706	Potri.001G131300	exonic
Chr01:10576299	T	C	3	5	0.625	4	2	0.333333	Potri.001G131400	UTR5
Chr01:10576326	T	G	3	9	0.75	4	4	0.5	Potri.001G131400	UTR5
Chr01:10576361	C	G	14	3	0.176471	8	4	0.333333	Potri.001G131400	UTR5
Chr01:10577805	A	G	1	4	0.8	2	3	0.6	Potri.001G131400	intronic
Chr01:10578154	G	T	29	12	0.292683	11	11	0.5	Potri.001G131400	exonic
Chr01:10578161	G	A	13	25	0.657895	16	11	0.407407	Potri.001G131400	exonic
Chr01:10578359	T	C	5	7	0.583333	2	2	0.5	Potri.001G131400	exonic
Chr01:10579062	A	T	16	23	0.589744	8	9	0.529412	Potri.001G131400	exonic
Chr01:10579525	T	C	3	3	0.5	5	2	0.285714	Potri.001G131400	exonic
Chr01:10579584	G	A	12	15	0.555556	11	16	0.592593	Potri.001G131400	exonic
Chr01:10579675	C	T	16	12	0.428571	15	6	0.285714	Potri.001G131400	exonic
Chr01:10580035	C	T	17	5	0.227273	2	3	0.6	Potri.001G131400	exonic
Chr01:10580155	C	T	7	3	0.3	1	4	0.8	Potri.001G131400	exonic
Chr01:10581533	C	T	5	4	0.444444	3	3	0.5	Potri.001G131400	UTR3
Chr01:10581541	T	A	5	4	0.444444	3	2	0.4	Potri.001G131400	UTR3
Chr01:10594621	C	T	2	10	0.833333	4	2	0.333333	Potri.001G131500	exonic
Chr01:10599269	C	G	11	13	0.541667	5	9	0.642857	Potri.001G131600	exonic
Chr01:10599299	T	A	9	11	0.55	4	6	0.6	Potri.001G131600	exonic
Chr01:10599313	T	C	5	6	0.545455	2	4	0.666667	Potri.001G131600	exonic
Chr01:10646607	A	T	17	12	0.413793	6	7	0.538462	Potri.001G132400	exonic
Chr01:10651528	G	A	2	2	0.5	1	2	0.666667	Potri.001G132500	exonic
Chr01:10651535	C	G	2	1	0.333333	1	1	0.5	Potri.001G132500	exonic
Chr01:10653126	C	T	9	5	0.357143	6	3	0.333333	Potri.001G132600	exonic
Chr01:10653223	C	T	16	13	0.448276	4	4	0.5	Potri.001G132600	exonic
Chr01:10653300	A	G	7	6	0.461538	5	3	0.375	Potri.001G132600	exonic
Chr01:10653395	T	G	2	2	0.5	2	1	0.333333	Potri.001G132600	intronic
Chr01:10656401	T	C	3	10	0.769231	1	2	0.666667	Potri.001G132600	exonic
Chr01:10661781	T	G	6	5	0.454545	3	5	0.625	Potri.001G132700	UTR5
Chr01:10661853	C	G	37	12	0.244898	35	5	0.125	Potri.001G132700	UTR5
Chr01:10661881	A	G	13	32	0.711111	7	30	0.810811	Potri.001G132700	UTR5
Chr01:10665116	C	T	20	18	0.473684	18	10	0.357143	Potri.001G132700	exonic
Chr01:10665743	G	A	84	84	0.5	66	41	0.383178	Potri.001G132700	exonic
Chr01:10666824	A	G	37	33	0.471429	21	19	0.475	Potri.001G132700	UTR3
Chr01:10666918	G	T	24	4	0.142857	15	3	0.166667	Potri.001G132700	UTR3
Chr01:10666923	A	T	24	4	0.142857	17	3	0.15	Potri.001G132700	exonic
Chr01:10671799	A	T	6	2	0.25	3	6	0.666667	Potri.001G132800	exonic
Chr01:10671912	G	A	13	5	0.277778	4	1	0.2	Potri.001G132800	exonic
Chr01:10694992	A	C	7	5	0.416667	3	6	0.666667	Potri.001G132900	UTR3
Chr01:10700340	A	G	10	3	0.230769	3	5	0.625	Potri.001G133000	exonic
Chr01:10700770	T	C	7	4	0.363636	3	2	0.4	Potri.001G133000	exonic
Chr01:10718255	A	G	5	1	0.166667	1	4	0.8	Potri.001G133300	exonic
Chr01:10719129	G	A	4	6	0.6	3	2	0.4	Potri.001G133400	UTR3
Chr01:10719491	G	T	18	12	0.4	13	4	0.235294	Potri.001G133400	exonic
Chr01:10721581	A	T	11	3	0.214286	6	5	0.454545	Potri.001G133400	UTR5
Chr01:10721626	A	T	15	9	0.375	12	7	0.368421	Potri.001G133400	UTR5
Chr01:10721656	T	A	9	13	0.590909	7	12	0.631579	Potri.001G133400	UTR5
Chr01:10733582	T	C	26	5	0.16129	8	4	0.333333	Potri.001G133500	exonic
Chr01:10733597	G	T	20	5	0.2	8	4	0.333333	Potri.001G133500	exonic
Chr01:10741331	G	A	4	7	0.636364	3	3	0.5	Potri.001G133600	exonic
Chr01:10741342	G	T	10	4	0.285714	4	3	0.428571	Potri.001G133600	exonic
Chr01:10741379	G	A	7	2	0.222222	6	2	0.25	Potri.001G133600	exonic
Chr01:10770459	C	G	141	195	0.580357	86	97	0.530055	Potri.001G134000	exonic
Chr01:10771076	G	C	125	197	0.611801	57	112	0.662722	Potri.001G134000	exonic
Chr01:10771536	C	A	7	6	0.461538	2	2	0.5	Potri.001G134000	intronic
Chr01:10771557	A	G	4	3	0.428571	1	2	0.666667	Potri.001G134000	intronic
Chr01:10772449	T	C	370	224	0.377104	231	121	0.34375	Potri.001G134000	exonic
Chr01:10772886	T	C	55	397	0.878319	26	289	0.91746	Potri.001G134000	UTR5
Chr01:10778110	A	G	11	6	0.352941	12	3	0.2	Potri.001G134100	intronic
Chr01:10778129	A	T	5	9	0.642857	2	9	0.818182	Potri.001G134100	intronic
Chr01:10779923	T	C	27	46	0.630137	34	30	0.46875	Potri.001G134100	UTR5
Chr01:10779943	C	T	44	26	0.371429	29	34	0.539683	Potri.001G134100	UTR5
Chr01:10798338	T	C	6	1	0.142857	6	2	0.25	Potri.001G134400 \Potri.001G134500	intergenic
Chr01:10798462	G	A	4	2	0.333333	10	2	0.166667	Potri.001G134400 \Potri.001G134500	intergenic
Chr01:10811673	T	C	5	1	0.166667	1	3	0.75	Potri.001G134500	intronic
Chr01:10811770	C	T	8	3	0.272727	2	4	0.666667	Potri.001G134500	exonic
Chr01:10811862	T	C	15	4	0.210526	9	2	0.181818	Potri.001G134500	exonic
Chr01:10812200	T	A	23	12	0.342857	18	8	0.307692	Potri.001G134500	intronic
Chr01:10812207	G	T	19	10	0.344828	22	5	0.185185	Potri.001G134500	intronic
Chr01:10812289	G	A	16	16	0.5	15	11	0.423077	Potri.001G134500	intronic
Chr01:10812474	C	A	35	30	0.461538	16	21	0.567568	Potri.001G134500	intronic
Chr01:10812519	T	C	33	19	0.365385	30	11	0.268293	Potri.001G134500	intronic
Chr01:10812550	T	C	29	21	0.42	24	8	0.25	Potri.001G134500	intronic
Chr01:10812603	C	T	8	12	0.6	2	14	0.875	Potri.001G134500	intronic
Chr01:10812613	T	C	2	8	0.8	3	3	0.5	Potri.001G134500	intronic
Chr01:10812716	A	T	23	8	0.258065	14	4	0.222222	Potri.001G134500	exonic
Chr01:10812802	C	G	33	9	0.214286	11	8	0.421053	Potri.001G134500	intronic
Chr01:10812975	G	C	59	15	0.202703	33	6	0.153846	Potri.001G134500	exonic
Chr01:10813084	T	C	14	20	0.588235	10	8	0.444444	Potri.001G134500	exonic
Chr01:10813098	A	T	23	11	0.323529	13	6	0.315789	Potri.001G134500	exonic
Chr01:10813228	G	A	15	5	0.25	11	6	0.352941	Potri.001G134500	exonic
Chr01:10813485	A	G	69	29	0.295918	34	15	0.306122	Potri.001G134500	exonic
Chr01:10813498	A	G	105	16	0.132231	47	8	0.145455	Potri.001G134500	exonic
Chr01:10813528	G	A	84	37	0.305785	49	14	0.222222	Potri.001G134500	exonic
Chr01:10813541	T	C	50	42	0.456522	22	27	0.55102	Potri.001G134500	exonic
Chr01:10813642	G	T	76	38	0.333333	45	20	0.307692	Potri.001G134500	exonic
Chr01:10813864	T	A	28	7	0.2	14	7	0.333333	Potri.001G134500	exonic
Chr01:10814044	C	T	75	11	0.127907	48	7	0.127273	Potri.001G134500	exonic
Chr01:10814050	A	T	10	86	0.895833	8	51	0.864407	Potri.001G134500	exonic
Chr01:10814323	T	C	39	13	0.25	23	12	0.342857	Potri.001G134500	exonic
Chr01:10814391	G	C	24	43	0.641791	20	22	0.52381	Potri.001G134500	exonic
Chr01:10814405	A	G	20	38	0.655172	17	22	0.564103	Potri.001G134500	exonic
Chr01:10814440	C	G	39	11	0.22	26	12	0.315789	Potri.001G134500	exonic
Chr01:10831227	C	A	6	8	0.571429	3	3	0.5	Potri.001G134800	exonic
Chr01:10833008	A	G	4	4	0.5	1	2	0.666667	Potri.001G134800	exonic
Chr01:10834548	A	T	4	4	0.5	4	3	0.428571	Potri.001G134800	exonic
Chr01:10834554	A	T	5	5	0.5	4	3	0.428571	Potri.001G134800	exonic
Chr01:10834596	T	A	7	8	0.533333	4	5	0.555556	Potri.001G134800	exonic
Chr01:10844764	T	C	15	11	0.423077	7	8	0.533333	Potri.001G135000	exonic
Chr01:10844801	A	G	11	8	0.421053	8	4	0.333333	Potri.001G135000	exonic
Chr01:10845688	C	G	7	7	0.5	6	3	0.333333	Potri.001G135000	UTR3
Chr01:10850080	T	C	28	29	0.508772	22	21	0.488372	Potri.001G135200	exonic
Chr01:10850206	C	A	4	5	0.555556	3	5	0.625	Potri.001G135200	exonic
Chr01:10852726	T	C	5	5	0.5	8	6	0.428571	Potri.001G135200	exonic
Chr01:10852853	T	A	35	34	0.492754	29	28	0.491228	Potri.001G135200	exonic
Chr01:10852858	A	G	32	36	0.529412	32	27	0.457627	Potri.001G135200	exonic
Chr01:10853015	T	C	34	14	0.291667	28	10	0.263158	Potri.001G135200	UTR3
Chr01:10857996	A	C	6	6	0.5	2	4	0.666667	Potri.001G135300	exonic
Chr01:10858469	T	C	7	8	0.533333	5	6	0.545455	Potri.001G135300	exonic
Chr01:10858505	C	T	6	5	0.454545	2	4	0.666667	Potri.001G135300	exonic
Chr01:10861869	T	C	6	10	0.625	5	6	0.545455	Potri.001G135300	exonic
Chr01:10861986	A	G	7	9	0.5625	3	4	0.571429	Potri.001G135300	exonic
Chr01:10862065	C	T	14	11	0.44	9	8	0.470588	Potri.001G135300	exonic
Chr01:10862117	C	T	16	15	0.483871	4	12	0.75	Potri.001G135300	exonic
Chr01:10862235	G	A	14	10	0.416667	6	9	0.6	Potri.001G135300	exonic
Chr01:10862265	G	A	6	15	0.714286	7	5	0.416667	Potri.001G135300	exonic
Chr01:10862352	A	G	16	16	0.5	4	13	0.764706	Potri.001G135300	exonic
Chr01:10862422	T	C	17	13	0.433333	4	16	0.8	Potri.001G135300	exonic
Chr01:10862446	G	A	13	17	0.566667	3	13	0.8125	Potri.001G135300	exonic
Chr01:10862511	G	A	20	11	0.354839	13	7	0.35	Potri.001G135300	exonic
Chr01:10867646	A	G	32	9	0.219512	23	9	0.28125	Potri.001G135400	UTR5
Chr01:10867816	A	G	21	17	0.447368	8	12	0.6	Potri.001G135400	intronic
Chr01:10868011	A	G	26	19	0.422222	22	3	0.12	Potri.001G135400	exonic
Chr01:10868159	T	C	31	33	0.515625	18	13	0.419355	Potri.001G135400	exonic
Chr01:10868222	T	C	41	25	0.378788	20	17	0.459459	Potri.001G135400	exonic
Chr01:10868240	T	C	22	37	0.627119	14	19	0.575758	Potri.001G135400	exonic
Chr01:10868265	A	C	34	7	0.170732	20	9	0.310345	Potri.001G135400	exonic
Chr01:10868330	G	A	42	13	0.236364	24	3	0.111111	Potri.001G135400	exonic
Chr01:10868457	G	A	15	11	0.423077	3	5	0.625	Potri.001G135400	exonic
Chr01:10868534	A	G	15	3	0.166667	7	3	0.3	Potri.001G135400	exonic
Chr01:10868552	C	T	16	5	0.238095	10	4	0.285714	Potri.001G135400	exonic
Chr01:10868596	T	C	20	10	0.333333	8	6	0.428571	Potri.001G135400	exonic
Chr01:10868657	G	T	19	11	0.366667	4	9	0.692308	Potri.001G135400	exonic
Chr01:10868713	A	G	28	14	0.333333	10	6	0.375	Potri.001G135400	exonic
Chr01:10868927	G	A	17	7	0.291667	7	9	0.5625	Potri.001G135400	exonic
Chr01:10869186	G	A	10	11	0.52381	4	5	0.555556	Potri.001G135400	exonic
Chr01:10869422	A	G	13	14	0.518519	7	6	0.461538	Potri.001G135400	exonic
Chr01:10869618	A	G	32	4	0.111111	13	9	0.409091	Potri.001G135400	exonic
Chr01:10870243	T	C	9	2	0.181818	2	3	0.6	Potri.001G135500	exonic
Chr01:10880866	G	A	3	8	0.727273	3	5	0.625	Potri.001G135700	exonic
Chr01:10889950	C	T	5	4	0.444444	1	3	0.75	Potri.001G135900	exonic
Chr01:1090647	A	G	20	61	0.753086	17	20	0.540541	Potri.001G015400	UTR3
Chr01:1090752	C	A	235	118	0.334278	121	73	0.376289	Potri.001G015400	exonic
Chr01:10908451	C	T	1	2	0.666667	4	5	0.555556	Potri.001G136000	exonic
Chr01:1090947	T	G	427	133	0.2375	216	80	0.27027	Potri.001G015400	exonic
Chr01:1091035	T	G	380	171	0.310345	192	88	0.314286	Potri.001G015400	exonic
Chr01:10910602	A	C	10	16	0.615385	6	2	0.25	Potri.001G136000	exonic
Chr01:1091148	A	G	221	215	0.493119	125	94	0.429224	Potri.001G015400	exonic
Chr01:1091586	G	C	241	168	0.410758	114	86	0.43	Potri.001G015400	exonic
Chr01:1091620	G	T	264	305	0.536028	137	157	0.534014	Potri.001G015400	exonic
Chr01:1091634	A	T	265	289	0.521661	150	157	0.511401	Potri.001G015400	exonic
Chr01:1091820	G	C	12	7	0.368421	2	5	0.714286	Potri.001G015400	intronic
Chr01:1092654	G	A	5	5	0.5	3	2	0.4	Potri.001G015400	intronic
Chr01:10928720	A	T	2	2	0.5	1	4	0.8	Potri.001G136200	exonic
Chr01:1093004	T	A	366	267	0.421801	163	134	0.451178	Potri.001G015400	exonic
Chr01:1093083	C	T	144	200	0.581395	81	87	0.517857	Potri.001G015400	exonic
Chr01:1093113	A	T	120	74	0.381443	49	51	0.51	Potri.001G015400	exonic
Chr01:10931157	G	A	2	2	0.5	1	5	0.833333	Potri.001G136200	exonic
Chr01:10932016	A	T	3	8	0.727273	6	2	0.25	Potri.001G136200	exonic
Chr01:10932074	T	C	11	6	0.352941	5	6	0.545455	Potri.001G136200	exonic
Chr01:10932697	A	G	12	8	0.4	4	6	0.6	Potri.001G136200	upstream
Chr01:1094687	A	G	123	54	0.305085	71	33	0.317308	Potri.001G015400	exonic
Chr01:1094693	A	G	116	39	0.251613	63	25	0.284091	Potri.001G015400	exonic
Chr01:1096129	A	G	36	87	0.707317	34	55	0.617978	Potri.001G015400	exonic
Chr01:1096261	T	C	219	23	0.0950413	117	19	0.139706	Potri.001G015400	exonic
Chr01:1096273	G	A	198	15	0.0704225	107	13	0.108333	Potri.001G015400	exonic
Chr01:10969538	T	G	17	9	0.346154	2	9	0.818182	Potri.001G136600	UTR3
Chr01:10969566	C	T	21	42	0.666667	23	11	0.323529	Potri.001G136600	UTR3
Chr01:10969737	A	T	124	65	0.343915	47	38	0.447059	Potri.001G136600	UTR3
Chr01:10969825	T	C	61	35	0.364583	29	20	0.408163	Potri.001G136600	UTR3
Chr01:10971485	T	C	18	13	0.419355	10	8	0.444444	Potri.001G136600	exonic
Chr01:10971784	T	C	5	5	0.5	3	4	0.571429	Potri.001G136600	intronic
Chr01:10971884	T	C	15	9	0.375	10	5	0.333333	Potri.001G136600	intronic
Chr01:10973139	T	A	3	5	0.625	2	2	0.5	Potri.001G136600	intronic
Chr01:10974881	A	G	20	16	0.444444	10	9	0.473684	Potri.001G136600	intronic
Chr01:10974906	A	G	22	12	0.352941	10	10	0.5	Potri.001G136600	intronic
Chr01:10974953	T	C	8	12	0.6	9	5	0.357143	Potri.001G136600	intronic
Chr01:10977181	T	C	9	10	0.526316	8	6	0.428571	Potri.001G136600	UTR5
Chr01:10977240	A	T	4	8	0.666667	1	3	0.75	Potri.001G136600	UTR5
Chr01:10994254	C	T	1	4	0.8	1	3	0.75	Potri.001G136800	intronic
Chr01:10994441	T	G	3	6	0.666667	6	4	0.4	Potri.001G136800	intronic
Chr01:11000326	T	C	129	48	0.271186	85	35	0.291667	Potri.001G136900	UTR3
Chr01:11000363	A	G	82	16	0.163265	57	12	0.173913	Potri.001G136900	UTR3
Chr01:11003117	T	C	10	8	0.444444	11	4	0.266667	Potri.001G137000	exonic
Chr01:11003162	T	C	14	2	0.125	8	5	0.384615	Potri.001G137000	exonic
Chr01:11003166	T	C	14	2	0.125	8	5	0.384615	Potri.001G137000	exonic
Chr01:11003321	T	C	6	12	0.666667	10	7	0.411765	Potri.001G137000	exonic
Chr01:11009351	A	G	11	4	0.266667	1	3	0.75	Potri.001G137200	intronic
Chr01:11009395	G	A	7	7	0.5	5	2	0.285714	Potri.001G137200	exonic
Chr01:11010292	C	T	128	135	0.513308	74	73	0.496599	Potri.001G137200	exonic
Chr01:11011419	T	C	98	16	0.140351	38	12	0.24	Potri.001G137200	exonic
Chr01:11011596	C	T	97	58	0.374194	53	38	0.417582	Potri.001G137200	exonic
Chr01:11011651	T	C	96	105	0.522388	52	56	0.518519	Potri.001G137200	exonic
Chr01:11011722	C	T	148	106	0.417323	76	57	0.428571	Potri.001G137200	exonic
Chr01:11011788	T	C	133	105	0.441176	67	58	0.464	Potri.001G137200	exonic
Chr01:11011854	C	T	121	120	0.497925	72	60	0.454545	Potri.001G137200	exonic
Chr01:11012235	C	A	129	40	0.236686	67	37	0.355769	Potri.001G137200	exonic
Chr01:11012247	C	G	118	36	0.233766	64	29	0.311828	Potri.001G137200	exonic
Chr01:11012380	C	G	71	21	0.228261	29	12	0.292683	Potri.001G137200	exonic
Chr01:11012395	A	C	71	41	0.366071	29	24	0.45283	Potri.001G137200	exonic
Chr01:11012425	T	G	91	45	0.330882	40	16	0.285714	Potri.001G137200	UTR5
Chr01:11012446	G	C	127	34	0.21118	49	9	0.155172	Potri.001G137200	UTR5
Chr01:11013281	A	T	17	3	0.15	4	3	0.428571	Potri.001G137200	intronic
Chr01:11014362	T	C	17	2	0.105263	4	3	0.428571	Potri.001G137300	exonic
Chr01:11014443	G	A	47	52	0.525253	31	25	0.446429	Potri.001G137200	UTR5
Chr01:11015523	A	G	22	18	0.45	5	6	0.545455	Potri.001G137400	UTR3
Chr01:110401	T	G	5	6	0.545455	4	2	0.333333	Potri.001G001500	UTR5
Chr01:110442	G	T	12	5	0.294118	8	2	0.2	Potri.001G001500	exonic
Chr01:110461	T	C	21	8	0.275862	11	3	0.214286	Potri.001G001500	exonic
Chr01:110564	C	A	16	8	0.333333	3	13	0.8125	Potri.001G001500	exonic
Chr01:1106128	T	A	4321	105	0.0237235	96	368	0.793103	Potri.001G015500	exonic
Chr01:11062953	C	T	4	2	0.333333	3	2	0.4	Potri.001G137700	exonic
Chr01:1106344	G	T	1629	674	0.292662	438	141	0.243523	Potri.001G015500	exonic
Chr01:11064911	G	A	5	4	0.444444	3	2	0.4	Potri.001G137700	exonic
Chr01:11065308	A	C	6	2	0.25	2	3	0.6	Potri.001G137700	exonic
Chr01:11065365	A	T	4	7	0.636364	5	2	0.285714	Potri.001G137700	exonic
Chr01:110655	T	G	30	23	0.433962	25	10	0.285714	Potri.001G001500	exonic
Chr01:11067015	G	A	3	2	0.4	1	2	0.666667	Potri.001G137700	exonic
Chr01:1106884	A	G	1205	186	0.133717	261	36	0.121212	Potri.001G015500	exonic
Chr01:11070004	G	T	14	4	0.222222	9	3	0.25	Potri.001G137700	UTR5
Chr01:1107202	A	G	645	198	0.234875	123	26	0.174497	Potri.001G015500	exonic
Chr01:1107641	A	C	7	8	0.533333	1	5	0.833333	Potri.001G015500	intronic
Chr01:1108017	A	G	68	140	0.673077	6	28	0.823529	Potri.001G015500	exonic
Chr01:1108191	T	A	684	337	0.330069	128	79	0.381643	Potri.001G015500	exonic
Chr01:1108959	G	T	565	259	0.31432	140	49	0.259259	Potri.001G015500	exonic
Chr01:1109100	T	C	167	88	0.345098	64	32	0.333333	Potri.001G015500	exonic
Chr01:11105210	A	G	78	79	0.503185	65	54	0.453782	Potri.001G137900	exonic
Chr01:1110522	A	C	113	55	0.327381	9	11	0.55	Potri.001G015500	exonic
Chr01:11105280	T	C	57	60	0.512821	42	41	0.493976	Potri.001G137900	exonic
Chr01:11105289	A	G	68	60	0.46875	41	40	0.493827	Potri.001G137900	exonic
Chr01:11105316	A	C	67	59	0.468254	41	39	0.4875	Potri.001G137900	exonic
Chr01:11105406	A	T	70	56	0.444444	45	40	0.470588	Potri.001G137900	exonic
Chr01:111129	T	C	20	13	0.393939	26	9	0.257143	Potri.001G001500	exonic
Chr01:11124920	T	A	4	2	0.333333	5	5	0.5	Potri.001G138300	exonic
Chr01:11127871	C	T	11	10	0.47619	10	6	0.375	Potri.001G138400	exonic
Chr01:111286	T	C	21	9	0.3	5	11	0.6875	Potri.001G001500	exonic
Chr01:11129394	A	G	3	5	0.625	3	2	0.4	Potri.001G138400	intronic
Chr01:111297	T	A	21	8	0.275862	4	12	0.75	Potri.001G001500	exonic
Chr01:111355	A	G	21	12	0.363636	11	15	0.576923	Potri.001G001500	exonic
Chr01:11138465	C	A	11	2	0.153846	8	2	0.2	Potri.001G138500	intronic
Chr01:11140075	C	G	5	4	0.444444	5	3	0.375	Potri.001G138500	exonic
Chr01:111406	G	A	11	15	0.576923	21	9	0.3	Potri.001G001500	exonic
Chr01:11140925	T	G	14	11	0.44	10	8	0.444444	Potri.001G138500	exonic
Chr01:11140960	C	T	24	18	0.428571	13	11	0.458333	Potri.001G138500	exonic
Chr01:11140996	G	A	24	19	0.44186	12	14	0.538462	Potri.001G138500	exonic
Chr01:111474	A	T	13	14	0.518519	16	8	0.333333	Potri.001G001500	exonic
Chr01:11147747	G	A	10	4	0.285714	9	3	0.25	Potri.001G138700	exonic
Chr01:11147772	G	T	10	3	0.230769	9	3	0.25	Potri.001G138700	UTR3
Chr01:111489	G	A	15	14	0.482759	16	8	0.333333	Potri.001G001500	exonic
Chr01:11153272	G	T	10	13	0.565217	3	10	0.769231	Potri.001G138900	exonic
Chr01:11153417	G	A	28	14	0.333333	28	10	0.263158	Potri.001G138900	exonic
Chr01:11153503	T	A	10	29	0.74359	11	15	0.576923	Potri.001G138900	exonic
Chr01:11154092	C	T	14	7	0.333333	5	3	0.375	Potri.001G138900	exonic
Chr01:111553	A	T	14	8	0.363636	8	12	0.6	Potri.001G001500	exonic
Chr01:11157126	T	A	5	4	0.444444	4	5	0.555556	Potri.001G139000	UTR3
Chr01:11157160	A	T	4	3	0.428571	4	2	0.333333	Potri.001G139000	UTR3
Chr01:11157507	G	A	12	15	0.555556	9	8	0.470588	Potri.001G138900	exonic
Chr01:111592	T	C	19	13	0.40625	15	7	0.318182	Potri.001G001500	UTR3
Chr01:11167905	C	A	5	2	0.285714	2	2	0.5	Potri.001G139200	exonic
Chr01:111707	T	C	5	5	0.5	3	4	0.571429	Potri.001G001500	UTR3
Chr01:11173548	C	G	4	3	0.428571	6	2	0.25	Potri.001G139300	exonic
Chr01:11186914	G	A	7	4	0.363636	4	7	0.636364	Potri.001G139400	exonic
Chr01:1118744	T	A	17	27	0.613636	13	18	0.580645	Potri.001G015600	exonic
Chr01:11188125	A	G	13	6	0.315789	7	6	0.461538	Potri.001G139400	exonic
Chr01:11188196	G	T	3	6	0.666667	2	2	0.5	Potri.001G139400	exonic
Chr01:11189317	G	A	9	9	0.5	9	7	0.4375	Potri.001G139400	exonic
Chr01:11189366	G	A	8	6	0.428571	5	3	0.375	Potri.001G139400	exonic
Chr01:1118960	G	T	37	28	0.430769	12	5	0.294118	Potri.001G015600	exonic
Chr01:11190301	C	T	8	3	0.272727	4	2	0.333333	Potri.001G139400	exonic
Chr01:11190401	T	A	3	8	0.727273	5	3	0.375	Potri.001G139400	exonic
Chr01:11191502	C	G	17	7	0.291667	7	5	0.416667	Potri.001G139400	exonic
Chr01:1119153	C	T	9	11	0.55	2	4	0.666667	Potri.001G015600	exonic
Chr01:1119158	T	G	10	7	0.411765	4	2	0.333333	Potri.001G015600	exonic
Chr01:1119500	A	G	55	13	0.191176	25	4	0.137931	Potri.001G015600	exonic
Chr01:1119818	A	G	34	12	0.26087	6	3	0.333333	Potri.001G015600	exonic
Chr01:11207703	A	G	4	3	0.428571	4	2	0.333333	Potri.001G139500	UTR5
Chr01:11207780	A	G	21	13	0.382353	11	10	0.47619	Potri.001G139500	exonic
Chr01:11207921	G	A	3	2	0.4	1	2	0.666667	Potri.001G139500	exonic
Chr01:11207944	A	T	3	10	0.769231	4	5	0.555556	Potri.001G139500	exonic
Chr01:11207958	A	G	5	8	0.615385	2	7	0.777778	Potri.001G139500	exonic
Chr01:1120807	T	A	13	18	0.580645	3	4	0.571429	Potri.001G015600	exonic
Chr01:11208242	G	C	17	17	0.5	9	14	0.608696	Potri.001G139500	exonic
Chr01:11208857	A	G	19	23	0.547619	12	25	0.675676	Potri.001G139500	exonic
Chr01:11208885	G	A	22	15	0.405405	24	11	0.314286	Potri.001G139500	exonic
Chr01:11209028	T	C	11	11	0.5	10	11	0.52381	Potri.001G139500	exonic
Chr01:11209103	G	A	5	9	0.642857	6	13	0.684211	Potri.001G139500	exonic
Chr01:11209273	C	T	22	2	0.0833333	18	3	0.142857	Potri.001G139500	exonic
Chr01:11209424	T	C	22	11	0.333333	14	8	0.363636	Potri.001G139500	exonic
Chr01:11209605	C	G	25	12	0.324324	3	7	0.7	Potri.001G139500	exonic
Chr01:11209653	A	G	13	17	0.566667	7	6	0.461538	Potri.001G139500	exonic
Chr01:11210928	T	C	8	22	0.733333	5	8	0.615385	Potri.001G139500	exonic
Chr01:11210967	T	C	14	32	0.695652	5	14	0.736842	Potri.001G139500	exonic
Chr01:11211007	C	T	26	6	0.1875	12	2	0.142857	Potri.001G139500	exonic
Chr01:1121694	G	T	26	18	0.409091	11	5	0.3125	Potri.001G015600	exonic
Chr01:11224959	G	A	30	8	0.210526	17	5	0.227273	Potri.001G139600	exonic
Chr01:11225596	C	T	13	6	0.315789	4	4	0.5	Potri.001G139600	exonic
Chr01:11226558	T	A	42	36	0.461538	23	19	0.452381	Potri.001G139600	exonic
Chr01:11226985	A	G	27	18	0.4	15	8	0.347826	Potri.001G139600	exonic
Chr01:11227706	A	T	49	42	0.461538	25	20	0.444444	Potri.001G139600	exonic
Chr01:11228427	T	C	43	30	0.410959	25	15	0.375	Potri.001G139600	exonic
Chr01:11229227	T	C	41	12	0.226415	13	12	0.48	Potri.001G139600	exonic
Chr01:11229299	G	T	45	40	0.470588	21	29	0.58	Potri.001G139600	exonic
Chr01:11229451	A	G	30	7	0.189189	11	3	0.214286	Potri.001G139600	exonic
Chr01:11229460	T	C	26	4	0.133333	10	1	0.0909091	Potri.001G139600	exonic
Chr01:11230361	T	A	53	55	0.509259	29	22	0.431373	Potri.001G139600	exonic
Chr01:11230407	G	A	26	28	0.518519	14	16	0.533333	Potri.001G139600	exonic
Chr01:11230424	C	A	21	21	0.5	12	11	0.478261	Potri.001G139600	exonic
Chr01:11230818	G	C	17	13	0.433333	7	3	0.3	Potri.001G139600	exonic
Chr01:11231095	G	A	49	57	0.537736	27	28	0.509091	Potri.001G139600	exonic
Chr01:11231638	A	G	33	19	0.365385	12	17	0.586207	Potri.001G139600	exonic
Chr01:11232061	A	G	4	7	0.636364	1	3	0.75	Potri.001G139600	exonic
Chr01:11249762	C	G	4	10	0.714286	6	3	0.333333	Potri.001G139800	UTR5
Chr01:11250084	T	C	21	5	0.192308	12	4	0.25	Potri.001G139800	exonic
Chr01:11251775	G	A	14	4	0.222222	7	6	0.461538	Potri.001G139800	exonic
Chr01:11251789	C	T	7	17	0.708333	6	9	0.6	Potri.001G139800	exonic
Chr01:11287224	T	C	50	112	0.691358	20	64	0.761905	Potri.001G140200	exonic
Chr01:11287563	T	C	7	11	0.611111	7	5	0.416667	Potri.001G140200	intronic
Chr01:11287742	A	G	21	5	0.192308	5	2	0.285714	Potri.001G140200	intronic
Chr01:11287757	T	C	8	26	0.764706	2	5	0.714286	Potri.001G140200	intronic
Chr01:11287795	A	C	7	26	0.787879	2	6	0.75	Potri.001G140200	intronic
Chr01:11288167	T	C	170	36	0.174757	71	11	0.134146	Potri.001G140200	exonic
Chr01:11288245	T	A	303	56	0.155989	86	12	0.122449	Potri.001G140200	exonic
Chr01:11288420	A	T	21	19	0.475	4	8	0.666667	Potri.001G140200	exonic
Chr01:11288559	A	G	58	171	0.746725	19	65	0.77381	Potri.001G140200	exonic
Chr01:11288642	T	G	6	29	0.828571	3	9	0.75	Potri.001G140200	UTR3
Chr01:11289143	A	G	72	44	0.37931	26	10	0.277778	Potri.001G140200	UTR3
Chr01:11290584	T	C	25	7	0.21875	21	3	0.125	Potri.001G140300	UTR3
Chr01:11292037	C	T	5	2	0.285714	3	4	0.571429	Potri.001G140300	exonic
Chr01:11292074	G	T	5	2	0.285714	3	4	0.571429	Potri.001G140300	exonic
Chr01:11293479	C	G	17	3	0.15	6	6	0.5	Potri.001G140300	exonic
Chr01:11293495	A	C	16	3	0.157895	4	4	0.5	Potri.001G140300	exonic
Chr01:112997	A	G	20	9	0.310345	15	7	0.318182	Potri.001G001600	UTR3
Chr01:11306881	G	A	29	28	0.491228	17	20	0.540541	Potri.001G140600	exonic
Chr01:11307037	G	A	62	42	0.403846	33	29	0.467742	Potri.001G140600	exonic
Chr01:11307100	A	T	34	48	0.585366	27	33	0.55	Potri.001G140600	exonic
Chr01:11307115	A	G	30	34	0.53125	23	27	0.54	Potri.001G140600	exonic
Chr01:11310565	G	A	5	4	0.444444	5	6	0.545455	Potri.001G140600	exonic
Chr01:11310672	C	T	10	11	0.52381	7	6	0.461538	Potri.001G140600	UTR5
Chr01:11310710	A	T	10	9	0.473684	5	7	0.583333	Potri.001G140600	UTR5
Chr01:11310732	A	G	6	3	0.333333	2	3	0.6	Potri.001G140600	UTR5
Chr01:11329352	T	C	6	5	0.454545	6	2	0.25	Potri.001G140800	UTR5
Chr01:11330116	T	G	12	17	0.586207	9	8	0.470588	Potri.001G140800	exonic
Chr01:11331912	C	T	10	4	0.285714	1	6	0.857143	Potri.001G140800	exonic
Chr01:11331945	T	C	6	15	0.714286	7	5	0.416667	Potri.001G140800	exonic
Chr01:11331977	G	T	16	9	0.36	6	11	0.647059	Potri.001G140800	exonic
Chr01:11332018	T	C	9	13	0.590909	8	9	0.529412	Potri.001G140800	exonic
Chr01:11332244	A	G	9	4	0.307692	6	4	0.4	Potri.001G140800	UTR3
Chr01:113380	C	T	70	40	0.363636	26	34	0.566667	Potri.001G001600	exonic
Chr01:11343358	T	C	2	3	0.6	1	2	0.666667	Potri.001G141100	exonic
Chr01:11348743	A	T	10	5	0.333333	6	2	0.25	Potri.001G141200	exonic
Chr01:11349411	C	T	11	2	0.153846	9	3	0.25	Potri.001G141200	exonic
Chr01:11349445	T	G	2	12	0.857143	3	9	0.75	Potri.001G141200	exonic
Chr01:11349559	C	T	8	8	0.5	10	4	0.285714	Potri.001G141200	exonic
Chr01:11349571	A	G	8	6	0.428571	4	9	0.692308	Potri.001G141200	exonic
Chr01:11349634	T	C	4	4	0.5	3	5	0.625	Potri.001G141200	exonic
Chr01:11349665	G	C	6	3	0.333333	4	3	0.428571	Potri.001G141200	exonic
Chr01:11357490	T	C	56	18	0.243243	52	17	0.246377	Potri.001G141300	UTR3
Chr01:11357513	C	T	28	65	0.698925	28	58	0.674419	Potri.001G141300	UTR3
Chr01:11357640	G	C	107	21	0.164062	141	23	0.140244	Potri.001G141300	exonic
Chr01:11358359	A	G	2	3	0.6	1	6	0.857143	Potri.001G141300	intronic
Chr01:11358391	C	A	2	2	0.5	1	4	0.8	Potri.001G141300	intronic
Chr01:11358595	A	T	99	44	0.307692	72	42	0.368421	Potri.001G141300	exonic
Chr01:11359485	A	C	3	2	0.4	5	2	0.285714	Potri.001G141300	intronic
Chr01:11359860	A	G	1	5	0.833333	1	4	0.8	Potri.001G141300	intronic
Chr01:11359949	C	A	106	110	0.509259	99	107	0.519417	Potri.001G141300	exonic
Chr01:11363562	T	C	4	2	0.333333	3	3	0.5	Potri.001G141400	exonic
Chr01:11363574	G	C	3	3	0.5	4	2	0.333333	Potri.001G141400	exonic
Chr01:11363661	T	C	3	2	0.4	3	3	0.5	Potri.001G141400	exonic
Chr01:11363670	T	C	3	3	0.5	2	4	0.666667	Potri.001G141400	exonic
Chr01:11382826	A	T	4	8	0.666667	5	6	0.545455	Potri.001G141500	intronic
Chr01:11382858	G	C	12	4	0.25	10	5	0.333333	Potri.001G141500	intronic
Chr01:11383117	T	C	10	9	0.473684	5	7	0.583333	Potri.001G141500	intronic
Chr01:11383254	A	G	48	36	0.428571	35	25	0.416667	Potri.001G141500	exonic
Chr01:11383338	T	G	13	2	0.133333	11	3	0.214286	Potri.001G141500	exonic
Chr01:11384350	A	G	12	2	0.142857	5	2	0.285714	Potri.001G141500	intronic
Chr01:11384363	A	T	2	12	0.857143	2	5	0.714286	Potri.001G141500	intronic
Chr01:1139133	A	G	2	7	0.777778	1	4	0.8	Potri.001G015700	exonic
Chr01:1139674	A	C	4	4	0.5	1	2	0.666667	Potri.001G015700	exonic
Chr01:11405386	G	A	4	5	0.555556	4	3	0.428571	Potri.001G141600	exonic
Chr01:11405896	T	C	14	17	0.548387	13	2	0.133333	Potri.001G141600	exonic
Chr01:1140806	A	T	7	7	0.5	6	9	0.6	Potri.001G015700	exonic
Chr01:1140857	G	A	7	2	0.222222	2	4	0.666667	Potri.001G015700	exonic
Chr01:114445	A	C	61	28	0.314607	42	18	0.3	Potri.001G001600	exonic
Chr01:11446569	G	T	6	7	0.538462	1	5	0.833333	Potri.001G142100	UTR3
Chr01:11448038	C	T	4	9	0.692308	1	5	0.833333	Potri.001G142100	intronic
Chr01:11448165	A	C	4	12	0.75	2	3	0.6	Potri.001G142100	intronic
Chr01:11449306	A	G	60	6	0.0909091	34	9	0.209302	Potri.001G142100	exonic
Chr01:11449392	C	T	19	13	0.40625	18	10	0.357143	Potri.001G142100	exonic
Chr01:11449675	T	C	22	9	0.290323	21	6	0.222222	Potri.001G142100	exonic
Chr01:11449742	T	G	40	17	0.298246	29	17	0.369565	Potri.001G142100	exonic
Chr01:11449981	A	C	31	12	0.27907	22	7	0.241379	Potri.001G142100	exonic
Chr01:11450814	G	A	4	5	0.555556	5	5	0.5	Potri.001G142100	exonic
Chr01:11450853	A	G	6	8	0.571429	5	6	0.545455	Potri.001G142100	exonic
Chr01:114566	G	T	54	40	0.425532	37	22	0.372881	Potri.001G001600	exonic
Chr01:11468960	A	G	18	76	0.808511	4	22	0.846154	Potri.001G142200	exonic
Chr01:11469032	C	A	60	27	0.310345	17	11	0.392857	Potri.001G142200	exonic
Chr01:11469206	T	A	53	20	0.273973	22	5	0.185185	Potri.001G142200	exonic
Chr01:11469306	G	T	70	17	0.195402	14	7	0.333333	Potri.001G142200	exonic
Chr01:11469314	A	G	23	69	0.75	11	14	0.56	Potri.001G142200	exonic
Chr01:11469383	T	A	102	30	0.227273	19	16	0.457143	Potri.001G142200	exonic
Chr01:11469440	T	C	103	57	0.35625	17	19	0.527778	Potri.001G142200	exonic
Chr01:11469491	G	A	102	96	0.484848	30	17	0.361702	Potri.001G142200	exonic
Chr01:11469536	G	C	72	92	0.560976	17	27	0.613636	Potri.001G142200	exonic
Chr01:11469573	C	A	89	31	0.258333	25	7	0.21875	Potri.001G142200	exonic
Chr01:11469659	T	C	106	27	0.203008	24	6	0.2	Potri.001G142200	exonic
Chr01:11469692	G	A	87	23	0.209091	18	5	0.217391	Potri.001G142200	exonic
Chr01:11469723	A	C	23	36	0.610169	5	6	0.545455	Potri.001G142200	exonic
Chr01:11469836	C	T	85	52	0.379562	29	14	0.325581	Potri.001G142200	exonic
Chr01:11469995	T	C	142	25	0.149701	26	7	0.212121	Potri.001G142200	exonic
Chr01:11470040	A	T	157	86	0.353909	40	25	0.384615	Potri.001G142200	exonic
Chr01:11470121	T	G	114	122	0.516949	32	29	0.47541	Potri.001G142200	exonic
Chr01:11470565	A	G	61	48	0.440367	18	12	0.4	Potri.001G142200	exonic
Chr01:11470574	G	T	53	47	0.47	9	18	0.666667	Potri.001G142200	exonic
Chr01:11482702	C	T	3	2	0.4	1	2	0.666667	Potri.001G142300	UTR5
Chr01:11483151	A	T	3	3	0.5	1	4	0.8	Potri.001G142300	UTR5
Chr01:11483205	T	C	2	5	0.714286	1	3	0.75	Potri.001G142300	UTR5
Chr01:11506874	A	G	1	2	0.666667	2	2	0.5	Potri.001G142500	exonic
Chr01:11506875	T	A	1	2	0.666667	2	2	0.5	Potri.001G142500	exonic
Chr01:11519350	G	A	131	19	0.126667	121	19	0.135714	Potri.001G142600	UTR3
Chr01:11519576	G	C	109	46	0.296774	64	46	0.418182	Potri.001G142600	exonic
Chr01:11639612	C	G	56	91	0.619048	39	59	0.602041	Potri.001G143200	exonic
Chr01:11639636	C	T	92	35	0.275591	62	29	0.318681	Potri.001G143200	exonic
Chr01:11639696	T	C	78	28	0.264151	58	18	0.236842	Potri.001G143200	exonic
Chr01:11640182	A	T	4	2	0.333333	2	3	0.6	Potri.001G143200	intronic
Chr01:11640451	T	G	46	5	0.0980392	32	11	0.255814	Potri.001G143200	exonic
Chr01:11640485	C	T	25	77	0.754902	23	64	0.735632	Potri.001G143200	exonic
Chr01:11640507	C	G	79	45	0.362903	66	31	0.319588	Potri.001G143200	exonic
Chr01:11640583	C	A	33	34	0.507463	21	24	0.533333	Potri.001G143200	exonic
Chr01:11640853	C	T	5	5	0.5	2	5	0.714286	Potri.001G143200	exonic
Chr01:1164224	G	A	4	3	0.428571	2	2	0.5	Potri.001G015900	intronic
Chr01:1164613	A	T	24	8	0.25	12	2	0.142857	Potri.001G015900	exonic
Chr01:11648982	A	G	11	6	0.352941	5	4	0.444444	Potri.001G143400	UTR3
Chr01:11649567	T	C	18	4	0.181818	8	3	0.272727	Potri.001G143400	exonic
Chr01:1164988	T	G	26	25	0.490196	8	9	0.529412	Potri.001G015900	exonic
Chr01:1165131	A	C	34	30	0.46875	13	14	0.518519	Potri.001G015900	exonic
Chr01:11651343	T	C	86	61	0.414966	53	31	0.369048	Potri.001G143400	exonic
Chr01:1165264	A	G	30	27	0.473684	15	14	0.482759	Potri.001G015900	exonic
Chr01:1165378	T	A	33	28	0.459016	12	19	0.612903	Potri.001G015900	exonic
Chr01:1165595	G	A	31	18	0.367347	21	7	0.25	Potri.001G015900	exonic
Chr01:1165603	G	T	31	14	0.311111	21	6	0.222222	Potri.001G015900	exonic
Chr01:1165647	A	C	7	20	0.740741	4	9	0.692308	Potri.001G015900	exonic
Chr01:116573	G	A	28	51	0.64557	25	21	0.456522	Potri.001G001600	exonic
Chr01:11659794	C	A	4	4	0.5	4	2	0.333333	Potri.001G143500	exonic
Chr01:1166227	G	A	30	23	0.433962	20	14	0.411765	Potri.001G015900	exonic
Chr01:1166231	T	G	25	28	0.528302	13	16	0.551724	Potri.001G015900	exonic
Chr01:11672161	C	G	9	13	0.590909	6	4	0.4	Potri.001G143600	exonic
Chr01:11672169	A	T	15	9	0.375	5	7	0.583333	Potri.001G143600	exonic
Chr01:1167410	T	G	2	8	0.8	1	2	0.666667	Potri.001G016000 \Potri.001G015900	upstream\x3bdownstream
Chr01:11675089	G	A	8	8	0.5	7	6	0.461538	Potri.001G143600	UTR3
Chr01:11675150	A	G	8	5	0.384615	6	3	0.333333	Potri.001G143600	UTR3
Chr01:11698307	A	G	6	30	0.833333	12	18	0.6	Potri.001G143900	UTR3
Chr01:11698340	A	G	54	7	0.114754	36	4	0.1	Potri.001G143900	UTR3
Chr01:11698408	T	C	54	24	0.307692	43	18	0.295082	Potri.001G143900	UTR3
Chr01:11699002	T	C	9	29	0.763158	6	8	0.571429	Potri.001G143900	exonic
Chr01:11699184	G	A	18	4	0.181818	10	6	0.375	Potri.001G143900	exonic
Chr01:11699658	T	C	18	14	0.4375	11	4	0.266667	Potri.001G143900	exonic
Chr01:11699682	G	A	14	17	0.548387	4	11	0.733333	Potri.001G143900	exonic
Chr01:11699927	A	G	38	14	0.269231	23	4	0.148148	Potri.001G143900	exonic
Chr01:11700186	A	C	8	21	0.724138	5	16	0.761905	Potri.001G143900	intronic
Chr01:11700308	G	A	30	6	0.166667	22	4	0.153846	Potri.001G143900	UTR5
Chr01:11702377	C	T	7	4	0.363636	2	9	0.818182	Potri.001G144000	exonic
Chr01:11702432	A	G	11	10	0.47619	16	7	0.304348	Potri.001G144000	exonic
Chr01:11702441	C	T	11	13	0.541667	8	17	0.68	Potri.001G144000	exonic
Chr01:11702605	G	T	4	5	0.555556	2	3	0.6	Potri.001G144000	exonic
Chr01:11705906	T	C	13	11	0.458333	8	8	0.5	Potri.001G144000	exonic
Chr01:11706382	T	A	5	3	0.375	12	4	0.25	Potri.001G144000	exonic
Chr01:11715235	A	G	2	1	0.333333	2	2	0.5	Potri.001G144200	exonic
Chr01:11715244	C	T	1	2	0.666667	2	3	0.6	Potri.001G144200	exonic
Chr01:11722555	T	C	27	6	0.181818	9	8	0.470588	Potri.001G144300	exonic
Chr01:11735021	T	C	3	3	0.5	1	3	0.75	Potri.001G144400	exonic
Chr01:11737402	G	A	3	4	0.571429	3	2	0.4	Potri.001G144400	UTR5
Chr01:11747950	C	T	10	31	0.756098	11	13	0.541667	Potri.001G144500	exonic
Chr01:11747954	C	G	35	14	0.285714	14	12	0.461538	Potri.001G144500	exonic
Chr01:11748014	C	T	49	28	0.363636	24	13	0.351351	Potri.001G144500	exonic
Chr01:11748134	C	A	40	37	0.480519	20	19	0.487179	Potri.001G144500	exonic
Chr01:11748135	A	C	40	39	0.493671	21	19	0.475	Potri.001G144500	exonic
Chr01:11748345	A	G	26	17	0.395349	12	14	0.538462	Potri.001G144500	exonic
Chr01:11748392	T	C	54	53	0.495327	33	29	0.467742	Potri.001G144500	exonic
Chr01:11748477	T	A	39	56	0.589474	44	27	0.380282	Potri.001G144500	exonic
Chr01:11748623	G	A	21	30	0.588235	24	23	0.489362	Potri.001G144500	exonic
Chr01:11748722	C	T	12	39	0.764706	9	22	0.709677	Potri.001G144500	exonic
Chr01:11752473	T	C	19	18	0.486486	12	17	0.586207	Potri.001G144500	exonic
Chr01:11753314	A	G	17	2	0.105263	7	2	0.222222	Potri.001G144500	exonic
Chr01:11753320	A	G	15	10	0.4	10	2	0.166667	Potri.001G144500	exonic
Chr01:11753639	T	C	26	20	0.434783	24	16	0.4	Potri.001G144500	UTR3
Chr01:11753661	A	T	26	16	0.380952	24	17	0.414634	Potri.001G144500	UTR3
Chr01:11753680	A	T	30	32	0.516129	24	23	0.489362	Potri.001G144500	UTR3
Chr01:11753711	T	C	25	26	0.509804	18	19	0.513514	Potri.001G144500	UTR3
Chr01:11753745	G	A	20	21	0.512195	11	16	0.592593	Potri.001G144500	UTR3
Chr01:1176457	A	G	24	16	0.4	16	8	0.333333	Potri.001G016200	exonic
Chr01:1176675	G	A	63	47	0.427273	24	21	0.466667	Potri.001G016200	exonic
Chr01:1177380	T	A	6	5	0.454545	3	2	0.4	Potri.001G016200	exonic
Chr01:11782603	G	A	124	164	0.569444	124	100	0.446429	Potri.001G144800 \Potri.001G144900	UTR5\x3bUTR3
Chr01:1178543	G	A	13	11	0.458333	4	7	0.636364	Potri.001G016200	exonic
Chr01:1178570	G	T	9	5	0.357143	2	4	0.666667	Potri.001G016200	exonic
Chr01:11787870	C	A	19	31	0.62	21	41	0.66129	Potri.001G145100	exonic
Chr01:11787879	T	C	31	14	0.311111	37	17	0.314815	Potri.001G145100	exonic
Chr01:1181634	C	G	6	6	0.5	6	2	0.25	Potri.001G016300	exonic
Chr01:1181749	A	G	13	22	0.628571	9	13	0.590909	Potri.001G016300	exonic
Chr01:1181887	G	C	14	10	0.416667	2	9	0.818182	Potri.001G016300	exonic
Chr01:1182125	A	T	13	20	0.606061	8	11	0.578947	Potri.001G016300	exonic
Chr01:1182436	C	T	16	11	0.407407	9	4	0.307692	Potri.001G016300	exonic
Chr01:1182493	T	G	13	6	0.315789	5	4	0.444444	Potri.001G016300	exonic
Chr01:1182571	T	G	24	17	0.414634	11	7	0.388889	Potri.001G016300	exonic
Chr01:1182709	T	C	28	20	0.416667	16	20	0.555556	Potri.001G016300	exonic
Chr01:1182889	T	G	17	13	0.433333	12	24	0.666667	Potri.001G016300	exonic
Chr01:1182961	A	G	9	16	0.64	20	14	0.411765	Potri.001G016300	exonic
Chr01:1182970	T	C	16	9	0.36	12	17	0.586207	Potri.001G016300	exonic
Chr01:11843935	G	C	36	16	0.307692	13	14	0.518519	Potri.001G145400	exonic
Chr01:11844163	C	T	51	35	0.406977	28	19	0.404255	Potri.001G145400	exonic
Chr01:11844179	T	C	40	46	0.534884	23	29	0.557692	Potri.001G145400	exonic
Chr01:11857176	C	T	26	13	0.333333	15	4	0.210526	Potri.001G145700	exonic
Chr01:11857328	C	T	15	12	0.444444	4	6	0.6	Potri.001G145700	intronic
Chr01:11857329	A	G	15	12	0.444444	4	6	0.6	Potri.001G145700	intronic
Chr01:11857383	A	T	3	10	0.769231	2	2	0.5	Potri.001G145700	intronic
Chr01:11858011	A	C	19	17	0.472222	3	2	0.4	Potri.001G145700	exonic
Chr01:11858023	G	A	18	12	0.4	3	3	0.5	Potri.001G145700	exonic
Chr01:11858794	A	T	1	5	0.833333	1	4	0.8	Potri.001G145700	intronic
Chr01:118615	C	T	9	11	0.55	6	7	0.538462	Potri.001G001700	downstream
Chr01:11862952	A	G	11	8	0.421053	9	3	0.25	Potri.001G145700 \Potri.001G145800	intergenic
Chr01:11863023	G	T	11	7	0.388889	5	3	0.375	Potri.001G145700 \Potri.001G145800	intergenic
Chr01:11863072	T	A	31	8	0.205128	18	3	0.142857	Potri.001G145700 \Potri.001G145800	intergenic
Chr01:11863280	T	A	15	24	0.615385	10	24	0.705882	Potri.001G145700 \Potri.001G145800	intergenic
Chr01:118676	C	A	10	15	0.6	9	5	0.357143	Potri.001G001700	downstream
Chr01:11869759	A	G	13	15	0.535714	5	6	0.545455	Potri.001G145900	exonic
Chr01:118699	T	C	15	7	0.318182	4	7	0.636364	Potri.001G001700	downstream
Chr01:11870129	A	G	1	9	0.9	1	4	0.8	Potri.001G145900	exonic
Chr01:11870994	G	T	2	3	0.6	4	5	0.555556	Potri.001G145900	intronic
Chr01:11871609	T	G	21	8	0.275862	25	5	0.166667	Potri.001G145900	exonic
Chr01:11872299	A	G	9	16	0.64	11	18	0.62069	Potri.001G145900	exonic
Chr01:11872593	C	T	38	5	0.116279	31	16	0.340426	Potri.001G145900	exonic
Chr01:11872629	A	T	8	20	0.714286	22	22	0.5	Potri.001G145900	exonic
Chr01:11873040	G	A	23	8	0.258065	17	5	0.227273	Potri.001G145900	exonic
Chr01:11873281	A	G	2	2	0.5	1	3	0.75	Potri.001G145900	intronic
Chr01:11873455	G	T	2	3	0.6	2	2	0.5	Potri.001G145900	intronic
Chr01:11873560	A	C	7	3	0.3	4	2	0.333333	Potri.001G145900	intronic
Chr01:11873573	C	T	3	10	0.769231	2	5	0.714286	Potri.001G145900	intronic
Chr01:118741	G	A	16	8	0.333333	7	2	0.222222	Potri.001G001700	downstream
Chr01:11883831	G	T	17	4	0.190476	14	3	0.176471	Potri.001G146000	exonic
Chr01:11884051	T	C	22	14	0.388889	20	13	0.393939	Potri.001G146000	exonic
Chr01:11884173	G	T	13	3	0.1875	11	3	0.214286	Potri.001G146000	exonic
Chr01:11884228	A	G	14	18	0.5625	12	7	0.368421	Potri.001G146000	exonic
Chr01:11884304	C	A	13	8	0.380952	8	10	0.555556	Potri.001G146000	exonic
Chr01:11884317	C	T	14	7	0.333333	9	11	0.55	Potri.001G146000	exonic
Chr01:11884571	G	T	16	2	0.111111	16	3	0.157895	Potri.001G146000	exonic
Chr01:11884609	C	A	6	23	0.793103	5	15	0.75	Potri.001G146000	exonic
Chr01:11887576	G	T	17	6	0.26087	13	9	0.409091	Potri.001G146100	exonic
Chr01:11888848	C	T	5	3	0.375	1	2	0.666667	Potri.001G146100	intronic
Chr01:11888849	C	T	5	3	0.375	1	2	0.666667	Potri.001G146100	intronic
Chr01:11890105	T	G	19	25	0.568182	9	14	0.608696	Potri.001G146100	UTR5
Chr01:11901187	C	A	19	17	0.472222	7	13	0.65	Potri.001G146200	exonic
Chr01:11901253	G	A	31	36	0.537313	22	32	0.592593	Potri.001G146200	exonic
Chr01:11901310	G	A	20	32	0.615385	14	26	0.65	Potri.001G146200	exonic
Chr01:11901359	T	C	33	8	0.195122	27	3	0.1	Potri.001G146200	exonic
Chr01:11901400	T	C	27	9	0.25	28	9	0.243243	Potri.001G146200	exonic
Chr01:11901448	T	C	18	21	0.538462	18	19	0.513514	Potri.001G146200	exonic
Chr01:11923189	T	C	21	8	0.275862	10	8	0.444444	Potri.001G146400	exonic
Chr01:11925776	G	C	22	18	0.45	8	11	0.578947	Potri.001G146400	exonic
Chr01:11925794	G	T	28	19	0.404255	10	11	0.52381	Potri.001G146400	exonic
Chr01:11928482	G	A	31	16	0.340426	23	18	0.439024	Potri.001G146400	exonic
Chr01:11928558	G	A	16	30	0.652174	9	31	0.775	Potri.001G146400	exonic
Chr01:11928596	C	T	22	13	0.371429	27	10	0.27027	Potri.001G146400	exonic
Chr01:11933315	C	A	6	8	0.571429	5	2	0.285714	Potri.001G146500	UTR3
Chr01:11948838	C	T	4	4	0.5	2	6	0.75	Potri.001G146700	UTR3
Chr01:11949169	G	A	29	11	0.275	21	10	0.322581	Potri.001G146700	exonic
Chr01:11949351	A	G	6	10	0.625	4	4	0.5	Potri.001G146700	exonic
Chr01:11949382	A	G	8	5	0.384615	4	2	0.333333	Potri.001G146700	exonic
Chr01:11953485	A	G	19	6	0.24	14	2	0.125	Potri.001G146800	exonic
Chr01:11954361	G	A	4	13	0.764706	4	3	0.428571	Potri.001G146800	exonic
Chr01:11954370	A	G	15	4	0.210526	4	4	0.5	Potri.001G146800	exonic
Chr01:11954397	G	A	14	2	0.125	3	2	0.4	Potri.001G146800	exonic
Chr01:11965574	C	T	31	29	0.483333	14	26	0.65	Potri.001G146900	exonic
Chr01:11966261	G	A	29	45	0.608108	18	26	0.590909	Potri.001G146900	exonic
Chr01:11966312	T	C	41	42	0.506024	29	19	0.395833	Potri.001G146900	exonic
Chr01:11966349	G	A	33	30	0.47619	14	23	0.621622	Potri.001G146900	exonic
Chr01:11966429	G	A	35	38	0.520548	9	18	0.666667	Potri.001G146900	exonic
Chr01:11966686	A	G	7	13	0.65	2	4	0.666667	Potri.001G146900	exonic
Chr01:11966797	G	A	11	14	0.56	7	3	0.3	Potri.001G146900	exonic
Chr01:1196680	G	C	33	12	0.266667	19	6	0.24	Potri.001G016600	exonic
Chr01:1196744	A	G	25	10	0.285714	11	7	0.388889	Potri.001G016600	exonic
Chr01:1196774	G	A	39	15	0.277778	20	10	0.333333	Potri.001G016600	exonic
Chr01:1196957	T	A	41	33	0.445946	28	25	0.471698	Potri.001G016600	exonic
Chr01:1197012	T	C	35	37	0.513889	16	17	0.515152	Potri.001G016600	exonic
Chr01:1197119	C	G	39	26	0.4	29	15	0.340909	Potri.001G016600	exonic
Chr01:11972083	A	G	11	5	0.3125	13	7	0.35	Potri.001G147000	exonic
Chr01:11972317	A	G	8	13	0.619048	20	11	0.354839	Potri.001G147000	exonic
Chr01:11972439	C	A	8	22	0.733333	11	24	0.685714	Potri.001G147000	exonic
Chr01:11972494	A	C	26	11	0.297297	14	13	0.481481	Potri.001G147000	exonic
Chr01:11972525	A	G	11	16	0.592593	10	11	0.52381	Potri.001G147000	exonic
Chr01:11972579	T	A	8	3	0.272727	4	3	0.428571	Potri.001G147000	exonic
Chr01:11972734	G	T	3	7	0.7	10	7	0.411765	Potri.001G147000	exonic
Chr01:11972780	C	T	8	3	0.272727	8	7	0.466667	Potri.001G147000	exonic
Chr01:11972898	G	C	6	3	0.333333	6	2	0.25	Potri.001G147000	exonic
Chr01:11972938	T	C	4	5	0.555556	4	3	0.428571	Potri.001G147000	exonic
Chr01:1197307	A	G	32	26	0.448276	20	21	0.512195	Potri.001G016600	exonic
Chr01:1197434	G	A	36	51	0.586207	25	49	0.662162	Potri.001G016600	exonic
Chr01:1197453	G	A	51	36	0.413793	49	28	0.363636	Potri.001G016600	exonic
Chr01:1197485	A	T	48	24	0.333333	36	24	0.4	Potri.001G016600	exonic
Chr01:1197833	A	C	15	8	0.347826	13	5	0.277778	Potri.001G016600	exonic
Chr01:11980672	A	C	5	11	0.6875	1	3	0.75	Potri.001G147200	UTR3
Chr01:1198566	G	C	3	2	0.4	2	2	0.5	Potri.001G016600	exonic
Chr01:11989912	T	C	3	18	0.857143	3	11	0.785714	Potri.001G147300	exonic
Chr01:11990242	A	G	5	3	0.375	2	2	0.5	Potri.001G147300	exonic
Chr01:11990366	T	A	2	12	0.857143	1	7	0.875	Potri.001G147300	UTR3
Chr01:11992597	A	G	24	25	0.510204	19	11	0.366667	Potri.001G147400	exonic
Chr01:11992722	C	T	5	5	0.5	3	2	0.4	Potri.001G147400	exonic
Chr01:11992724	C	G	2	4	0.666667	2	1	0.333333	Potri.001G147400	exonic
Chr01:120006	A	G	12	5	0.294118	2	4	0.666667	Potri.001G001700	intronic
Chr01:12007796	C	A	12	39	0.764706	2	15	0.882353	Potri.001G147600	exonic
Chr01:12007856	C	T	27	7	0.205882	17	4	0.190476	Potri.001G147600	exonic
Chr01:12008000	A	G	5	17	0.772727	10	9	0.473684	Potri.001G147600	exonic
Chr01:12008521	G	A	15	6	0.285714	13	2	0.133333	Potri.001G147600	exonic
Chr01:12008612	A	G	7	2	0.222222	2	4	0.666667	Potri.001G147600	exonic
Chr01:12009103	T	C	1	5	0.833333	3	4	0.571429	Potri.001G147600	intronic
Chr01:120136	C	T	1	5	0.833333	3	3	0.5	Potri.001G001700	exonic
Chr01:12019577	A	G	16	25	0.609756	5	7	0.583333	Potri.001G147700	exonic
Chr01:12019625	T	G	26	6	0.1875	8	3	0.272727	Potri.001G147700	exonic
Chr01:120199	A	G	10	2	0.166667	5	2	0.285714	Potri.001G001700	intronic
Chr01:120201	G	A	10	2	0.166667	5	2	0.285714	Potri.001G001700	intronic
Chr01:12020249	T	G	6	11	0.647059	4	2	0.333333	Potri.001G147700	exonic
Chr01:12020557	A	G	5	8	0.615385	1	3	0.75	Potri.001G147700	UTR5
Chr01:120235	G	A	1	7	0.875	2	4	0.666667	Potri.001G001700	exonic
Chr01:12036786	T	C	18	3	0.142857	13	3	0.1875	Potri.001G147900	downstream
Chr01:12039986	T	A	19	15	0.441176	11	16	0.592593	Potri.001G148000	exonic
Chr01:12040543	A	G	9	16	0.64	9	11	0.55	Potri.001G148000	exonic
Chr01:12040773	A	G	2	6	0.75	1	5	0.833333	Potri.001G148000	exonic
Chr01:12049211	A	G	13	11	0.458333	10	3	0.230769	Potri.001G148100	exonic
Chr01:12049591	G	A	17	19	0.527778	11	16	0.592593	Potri.001G148100	exonic
Chr01:12050979	A	T	16	3	0.157895	6	1	0.142857	Potri.001G148100	exonic
Chr01:12051030	A	T	32	3	0.0857143	13	2	0.133333	Potri.001G148100	exonic
Chr01:12053682	C	T	7	9	0.5625	7	2	0.222222	Potri.001G148100	exonic
Chr01:12055747	A	G	3	2	0.4	4	2	0.333333	Potri.001G148100	intronic
Chr01:12055766	A	G	4	3	0.428571	1	4	0.8	Potri.001G148100	intronic
Chr01:12055992	G	A	3	8	0.727273	3	7	0.7	Potri.001G148100	exonic
Chr01:12056374	T	A	2	5	0.714286	5	2	0.285714	Potri.001G148100	exonic
Chr01:12057193	C	G	13	3	0.1875	4	1	0.2	Potri.001G148100	exonic
Chr01:12057873	A	C	1	2	0.666667	1	4	0.8	Potri.001G148100	intronic
Chr01:12061005	C	T	9	4	0.307692	3	6	0.666667	Potri.001G148100	exonic
Chr01:12061011	C	T	5	10	0.666667	6	4	0.4	Potri.001G148100	exonic
Chr01:12061050	A	G	11	10	0.47619	9	7	0.4375	Potri.001G148100	exonic
Chr01:12061072	G	A	10	11	0.52381	7	8	0.533333	Potri.001G148100	exonic
Chr01:12061369	A	T	6	2	0.25	4	2	0.333333	Potri.001G148100	UTR3
Chr01:12061414	A	T	4	2	0.333333	3	2	0.4	Potri.001G148100	UTR3
Chr01:120692	A	G	20	24	0.545455	11	20	0.645161	Potri.001G001700	exonic
Chr01:120784	C	T	24	4	0.142857	13	5	0.277778	Potri.001G001700	exonic
Chr01:1208182	G	C	1	2	0.666667	2	2	0.5	Potri.001G016700	exonic
Chr01:1208219	T	C	3	5	0.625	4	5	0.555556	Potri.001G016700	exonic
Chr01:1208272	A	G	11	8	0.421053	10	8	0.444444	Potri.001G016700	exonic
Chr01:1208305	A	G	10	10	0.5	10	7	0.411765	Potri.001G016700	exonic
Chr01:1208344	A	T	19	6	0.24	6	6	0.5	Potri.001G016700	exonic
Chr01:1208487	C	T	2	2	0.5	5	3	0.375	Potri.001G016700	UTR3
Chr01:12085600	T	C	1	5	0.833333	2	7	0.777778	Potri.001G148300	exonic
Chr01:12086560	A	G	5	3	0.375	4	5	0.555556	Potri.001G148300	exonic
Chr01:12089101	T	A	1	2	0.666667	2	3	0.6	Potri.001G148300	exonic
Chr01:120894	T	C	12	6	0.333333	7	6	0.461538	Potri.001G001700	exonic
Chr01:12090139	A	G	10	4	0.285714	3	3	0.5	Potri.001G148300	exonic
Chr01:12090208	G	A	2	5	0.714286	2	2	0.5	Potri.001G148300	exonic
Chr01:12090463	G	A	7	10	0.588235	2	2	0.5	Potri.001G148300	exonic
Chr01:12102063	T	C	14	13	0.481481	3	4	0.571429	Potri.001G148400	exonic
Chr01:12102117	A	T	18	14	0.4375	9	5	0.357143	Potri.001G148400	exonic
Chr01:12104790	G	T	7	12	0.631579	4	8	0.666667	Potri.001G148400	exonic
Chr01:12105043	A	G	7	9	0.5625	3	6	0.666667	Potri.001G148400	intronic
Chr01:12106339	T	G	1	4	0.8	1	2	0.666667	Potri.001G148400	exonic
Chr01:12106446	G	C	22	15	0.405405	11	9	0.45	Potri.001G148400	exonic
Chr01:12106761	A	G	19	11	0.366667	7	7	0.5	Potri.001G148400	exonic
Chr01:12107641	T	G	13	2	0.133333	10	3	0.230769	Potri.001G148400	exonic
Chr01:12107648	C	T	12	2	0.142857	10	3	0.230769	Potri.001G148400	exonic
Chr01:12110233	A	G	12	10	0.454545	6	9	0.6	Potri.001G148400	UTR5
Chr01:12110247	G	T	6	4	0.4	9	5	0.357143	Potri.001G148400	UTR5
Chr01:12134009	C	T	5	2	0.285714	8	2	0.2	Potri.001G148500	exonic
Chr01:12134155	C	T	10	7	0.411765	2	8	0.8	Potri.001G148500	exonic
Chr01:1216268	A	G	6	7	0.538462	2	2	0.5	Potri.001G016900	exonic
Chr01:1216303	A	G	11	3	0.214286	4	3	0.428571	Potri.001G016900	exonic
Chr01:1216468	A	G	15	11	0.423077	19	8	0.296296	Potri.001G016900	exonic
Chr01:1216505	C	G	7	13	0.65	7	15	0.681818	Potri.001G016900	exonic
Chr01:1216538	A	T	3	5	0.625	4	11	0.733333	Potri.001G016900	exonic
Chr01:1216547	C	A	2	3	0.6	11	2	0.153846	Potri.001G016900	exonic
Chr01:1217970	G	C	4	4	0.5	5	2	0.285714	Potri.001G017000	UTR3
Chr01:1218966	G	T	14	4	0.222222	17	2	0.105263	Potri.001G017000	exonic
Chr01:1219224	A	G	22	6	0.214286	17	6	0.26087	Potri.001G017000	exonic
Chr01:12205904	G	A	2	12	0.857143	6	10	0.625	Potri.001G148700	exonic
Chr01:12206004	C	T	31	5	0.138889	21	5	0.192308	Potri.001G148700	exonic
Chr01:12206568	A	T	21	18	0.461538	9	24	0.727273	Potri.001G148700	exonic
Chr01:1221568	C	G	6	4	0.4	3	3	0.5	Potri.001G017000	exonic
Chr01:1221637	C	T	10	9	0.473684	3	5	0.625	Potri.001G017000	exonic
Chr01:1221803	T	A	48	10	0.172414	33	3	0.0833333	Potri.001G017000	exonic
Chr01:1221971	T	C	27	26	0.490566	19	16	0.457143	Potri.001G017000	exonic
Chr01:12226492	C	T	3	4	0.571429	5	5	0.5	Potri.001G148800	intronic
Chr01:12226624	T	C	4	7	0.636364	4	5	0.555556	Potri.001G148800	exonic
Chr01:12226796	T	C	5	2	0.285714	1	3	0.75	Potri.001G148800	intronic
Chr01:12226854	C	T	8	4	0.333333	2	2	0.5	Potri.001G148800	intronic
Chr01:12226963	T	C	2	7	0.777778	2	3	0.6	Potri.001G148800	intronic
Chr01:12231645	G	A	7	3	0.3	9	2	0.181818	Potri.001G148800	intronic
Chr01:12233071	T	A	35	3	0.0789474	13	2	0.133333	Potri.001G148800	exonic
Chr01:12234205	A	G	50	34	0.404762	25	24	0.489796	Potri.001G148800	exonic
Chr01:12234586	G	A	1	4	0.8	3	4	0.571429	Potri.001G148800	exonic
Chr01:12237177	T	C	38	22	0.366667	16	7	0.304348	Potri.001G148800	exonic
Chr01:12237236	A	T	26	12	0.315789	10	5	0.333333	Potri.001G148800	exonic
Chr01:12237270	C	T	8	11	0.578947	3	5	0.625	Potri.001G148800	exonic
Chr01:12240499	C	G	16	18	0.529412	18	9	0.333333	Potri.001G148800	exonic
Chr01:12240522	T	A	17	14	0.451613	9	15	0.625	Potri.001G148800	exonic
Chr01:12240555	A	T	9	7	0.4375	6	7	0.538462	Potri.001G148800	exonic
Chr01:12241115	A	G	25	14	0.358974	13	6	0.315789	Potri.001G148800	exonic
Chr01:12244463	A	C	3	9	0.75	6	5	0.454545	Potri.001G148800	exonic
Chr01:12244612	A	C	10	13	0.565217	14	16	0.533333	Potri.001G148800	exonic
Chr01:12244739	C	T	19	6	0.24	13	7	0.35	Potri.001G148800	exonic
Chr01:12244828	T	A	20	9	0.310345	14	3	0.176471	Potri.001G148800	exonic
Chr01:12244904	G	C	25	9	0.264706	13	5	0.277778	Potri.001G148800	exonic
Chr01:12245006	A	G	11	13	0.541667	6	6	0.5	Potri.001G148800	exonic
Chr01:12246859	T	G	1	6	0.857143	1	4	0.8	Potri.001G148800	intronic
Chr01:12246892	A	G	2	10	0.833333	2	5	0.714286	Potri.001G148800	intronic
Chr01:12247342	A	G	4	6	0.6	2	2	0.5	Potri.001G148800	intronic
Chr01:12247807	C	G	15	6	0.285714	3	3	0.5	Potri.001G148800	exonic
Chr01:12249091	A	G	20	4	0.166667	12	2	0.142857	Potri.001G148800	exonic
Chr01:12249114	G	A	10	18	0.642857	5	12	0.705882	Potri.001G148800	exonic
Chr01:12249200	C	A	9	11	0.55	5	6	0.545455	Potri.001G148800	exonic
Chr01:12251313	G	A	3	5	0.625	5	2	0.285714	Potri.001G148800	intronic
Chr01:12252779	A	G	4	3	0.428571	3	2	0.4	Potri.001G148800	exonic
Chr01:12254736	G	A	10	15	0.6	5	19	0.791667	Potri.001G148800	exonic
Chr01:12254805	C	T	22	10	0.3125	16	9	0.36	Potri.001G148800	exonic
Chr01:12254837	G	A	12	26	0.684211	11	12	0.521739	Potri.001G148800	exonic
Chr01:12254979	T	C	15	22	0.594595	13	16	0.551724	Potri.001G148800	exonic
Chr01:12254989	G	T	24	16	0.4	16	16	0.5	Potri.001G148800	exonic
Chr01:12255027	C	T	10	15	0.6	12	7	0.368421	Potri.001G148800	exonic
Chr01:12255075	A	T	4	7	0.636364	8	2	0.2	Potri.001G148800	exonic
Chr01:12255716	A	C	17	7	0.291667	13	11	0.458333	Potri.001G148800	exonic
Chr01:12255718	C	T	18	7	0.28	15	11	0.423077	Potri.001G148800	exonic
Chr01:12255878	T	C	21	15	0.416667	10	10	0.5	Potri.001G148800	exonic
Chr01:12257946	A	T	2	5	0.714286	1	4	0.8	Potri.001G148800	intronic
Chr01:12259695	G	T	15	11	0.423077	12	15	0.555556	Potri.001G148800	exonic
Chr01:12259709	A	T	9	16	0.64	13	9	0.409091	Potri.001G148800	exonic
Chr01:12259793	A	G	25	11	0.305556	9	10	0.526316	Potri.001G148800	exonic
Chr01:12261426	A	G	3	3	0.5	1	2	0.666667	Potri.001G148800	intronic
Chr01:12262156	G	A	11	8	0.421053	4	7	0.636364	Potri.001G148800	exonic
Chr01:12262564	G	T	10	14	0.583333	8	9	0.529412	Potri.001G148800	exonic
Chr01:12265262	T	C	20	25	0.555556	7	3	0.3	Potri.001G148800	exonic
Chr01:12267273	A	G	9	17	0.653846	6	6	0.5	Potri.001G148800	exonic
Chr01:12267291	T	G	22	9	0.290323	10	6	0.375	Potri.001G148800	exonic
Chr01:122713	T	C	3	10	0.769231	4	5	0.555556	Potri.001G001700	exonic
Chr01:12282743	C	T	2	2	0.5	1	2	0.666667	Potri.001G149000	exonic
Chr01:12287169	C	T	6	2	0.25	3	3	0.5	Potri.001G149100	exonic
Chr01:12314317	A	T	9	5	0.357143	4	2	0.333333	Potri.001G149200	UTR5
Chr01:12321720	G	T	13	5	0.277778	1	3	0.75	Potri.001G149400	exonic
Chr01:12330445	G	T	8	10	0.555556	2	4	0.666667	Potri.001G149600	UTR3
Chr01:12330480	A	G	11	8	0.421053	4	2	0.333333	Potri.001G149600	UTR3
Chr01:12330659	C	T	26	13	0.333333	16	11	0.407407	Potri.001G149600	exonic
Chr01:12331372	T	A	33	33	0.5	29	18	0.382979	Potri.001G149600	exonic
Chr01:12331447	G	T	21	25	0.543478	13	20	0.606061	Potri.001G149600	exonic
Chr01:12331925	C	T	13	22	0.628571	7	8	0.533333	Potri.001G149600	exonic
Chr01:12332112	G	A	8	11	0.578947	4	5	0.555556	Potri.001G149600	exonic
Chr01:12332392	T	C	32	17	0.346939	19	19	0.5	Potri.001G149600	exonic
Chr01:12332505	G	A	49	52	0.514851	30	62	0.673913	Potri.001G149600	exonic
Chr01:12339050	G	C	6	6	0.5	3	5	0.625	Potri.001G149800	exonic
Chr01:12340612	A	G	12	3	0.2	8	3	0.272727	Potri.001G149800	exonic
Chr01:12340686	A	T	13	11	0.458333	9	4	0.307692	Potri.001G149800	exonic
Chr01:12340714	C	T	12	14	0.538462	4	9	0.692308	Potri.001G149800	exonic
Chr01:12340741	A	C	16	11	0.407407	12	6	0.333333	Potri.001G149800	exonic
Chr01:12342686	C	A	14	11	0.44	3	8	0.727273	Potri.001G149900	exonic
Chr01:12387724	A	G	8	12	0.6	7	10	0.588235	Potri.001G150300	UTR5
Chr01:12387749	T	C	20	26	0.565217	21	16	0.432432	Potri.001G150300	UTR5
Chr01:12387788	C	G	35	26	0.42623	21	25	0.543478	Potri.001G150300	exonic
Chr01:12387885	T	A	27	21	0.4375	23	13	0.361111	Potri.001G150300	exonic
Chr01:12388384	A	G	2	2	0.5	1	3	0.75	Potri.001G150300	intronic
Chr01:12396954	A	T	1	2	0.666667	3	2	0.4	Potri.001G150400	exonic
Chr01:12397364	A	G	5	3	0.375	2	3	0.6	Potri.001G150400	exonic
Chr01:12397394	A	G	4	2	0.333333	1	2	0.666667	Potri.001G150400	exonic
Chr01:1240015	A	G	11	14	0.56	2	2	0.5	Potri.001G017300	UTR3
Chr01:1240029	T	G	20	11	0.354839	7	2	0.222222	Potri.001G017300	UTR3
Chr01:12400341	A	G	38	11	0.22449	10	9	0.473684	Potri.001G150500	exonic
Chr01:12400415	C	G	123	55	0.308989	59	40	0.40404	Potri.001G150500	exonic
Chr01:12400450	T	A	67	120	0.641711	48	67	0.582609	Potri.001G150500	exonic
Chr01:12400567	A	G	116	53	0.313609	45	33	0.423077	Potri.001G150500	exonic
Chr01:12401047	T	C	68	21	0.235955	28	14	0.333333	Potri.001G150500	exonic
Chr01:12401841	C	A	64	44	0.407407	32	23	0.418182	Potri.001G150500	exonic
Chr01:12402578	A	G	16	22	0.578947	15	9	0.375	Potri.001G150500	exonic
Chr01:12402669	G	A	23	30	0.566038	17	18	0.514286	Potri.001G150500	exonic
Chr01:12402708	T	C	38	22	0.366667	19	12	0.387097	Potri.001G150500	exonic
Chr01:12403160	T	G	58	5	0.0793651	34	4	0.105263	Potri.001G150500	exonic
Chr01:1240390	T	C	25	11	0.305556	15	4	0.210526	Potri.001G017300	exonic
Chr01:1240479	T	C	5	12	0.705882	5	6	0.545455	Potri.001G017300	exonic
Chr01:1241139	G	C	14	18	0.5625	3	1	0.25	Potri.001G017300	exonic
Chr01:1241276	G	A	45	21	0.318182	18	8	0.307692	Potri.001G017300	exonic
Chr01:1241342	C	T	54	37	0.406593	22	19	0.463415	Potri.001G017300	exonic
Chr01:1241358	A	T	42	51	0.548387	22	25	0.531915	Potri.001G017300	exonic
Chr01:1241542	C	T	56	7	0.111111	22	4	0.153846	Potri.001G017300	exonic
Chr01:1241660	A	C	21	14	0.4	16	6	0.272727	Potri.001G017300	UTR5
Chr01:1241883	A	G	31	20	0.392157	14	14	0.5	Potri.001G017300	UTR5
Chr01:12432396	A	T	3	4	0.571429	1	3	0.75	Potri.001G150800	downstream
Chr01:12432448	T	C	3	4	0.571429	1	2	0.666667	Potri.001G150800	downstream
Chr01:12446865	C	G	7	13	0.65	8	8	0.5	Potri.001G150900	exonic
Chr01:12450514	T	A	9	5	0.357143	5	2	0.285714	Potri.001G150900	exonic
Chr01:12450798	C	G	19	14	0.424242	14	5	0.263158	Potri.001G150900	exonic
Chr01:12451078	A	G	5	7	0.583333	5	3	0.375	Potri.001G150900	exonic
Chr01:12451628	A	G	6	7	0.538462	2	2	0.5	Potri.001G150900	exonic
Chr01:12456462	T	G	8	4	0.333333	4	1	0.2	Potri.001G150900	exonic
Chr01:12460774	T	C	1	4	0.8	2	2	0.5	Potri.001G150900	exonic
Chr01:12461930	T	C	5	2	0.285714	2	2	0.5	Potri.001G150900	intronic
Chr01:12461944	T	A	5	2	0.285714	1	2	0.666667	Potri.001G150900	intronic
Chr01:12482083	C	A	115	45	0.28125	61	26	0.298851	Potri.001G151300	exonic
Chr01:12482165	C	T	15	21	0.583333	12	10	0.454545	Potri.001G151300	exonic
Chr01:12483526	C	T	104	60	0.365854	58	43	0.425743	Potri.001G151300	exonic
Chr01:12483686	T	A	289	70	0.194986	161	52	0.244131	Potri.001G151300	exonic
Chr01:12503824	T	C	3	10	0.769231	5	2	0.285714	Potri.001G151700	exonic
Chr01:12507301	A	G	1	3	0.75	2	3	0.6	Potri.001G151700	exonic
Chr01:12531728	A	T	39	54	0.580645	22	39	0.639344	Potri.001G151800	exonic
Chr01:12532050	A	T	112	86	0.434343	78	72	0.48	Potri.001G151800	exonic
Chr01:12533114	G	T	6	6	0.5	6	13	0.684211	Potri.001G151800	intronic
Chr01:12533221	C	G	77	50	0.393701	91	46	0.335766	Potri.001G151800	exonic
Chr01:12549905	T	C	2	3	0.6	1	2	0.666667	Potri.001G152000	exonic
Chr01:12550957	G	A	23	14	0.378378	13	3	0.1875	Potri.001G152000	UTR5
Chr01:12560020	T	C	1	5	0.833333	2	4	0.666667	Potri.001G152100	intronic
Chr01:12561262	C	A	8	4	0.333333	5	6	0.545455	Potri.001G152100	exonic
Chr01:12561520	G	A	7	11	0.611111	3	4	0.571429	Potri.001G152100	exonic
Chr01:12561539	A	C	11	7	0.388889	3	4	0.571429	Potri.001G152100	exonic
Chr01:125669	T	C	27	5	0.15625	18	4	0.181818	Potri.001G001800	UTR3
Chr01:12571126	T	A	53	33	0.383721	19	11	0.366667	Potri.001G152200	UTR3
Chr01:12571829	A	G	2	2	0.5	3	5	0.625	Potri.001G152200	intronic
Chr01:12571941	A	G	3	8	0.727273	7	4	0.363636	Potri.001G152200	intronic
Chr01:12572599	C	T	65	45	0.409091	62	20	0.243902	Potri.001G152200	exonic
Chr01:12599069	A	G	26	13	0.333333	16	10	0.384615	Potri.001G152600	exonic
Chr01:12599075	C	G	32	18	0.36	21	14	0.4	Potri.001G152600	exonic
Chr01:12599138	C	T	68	43	0.387387	44	34	0.435897	Potri.001G152600	exonic
Chr01:12599839	T	G	1	4	0.8	1	2	0.666667	Potri.001G152600	intronic
Chr01:12600330	T	C	31	40	0.56338	20	22	0.52381	Potri.001G152600	exonic
Chr01:12600408	G	A	39	29	0.426471	18	12	0.4	Potri.001G152600	exonic
Chr01:12601747	G	A	73	72	0.496552	33	42	0.56	Potri.001G152600	exonic
Chr01:12611247	G	T	3	3	0.5	4	3	0.428571	Potri.001G152800	exonic
Chr01:12611294	T	A	8	3	0.272727	5	4	0.444444	Potri.001G152800	exonic
Chr01:12615280	C	T	19	23	0.547619	14	17	0.548387	Potri.001G153000	UTR3
Chr01:12615423	C	T	20	20	0.5	7	12	0.631579	Potri.001G153000	UTR3
Chr01:12615612	G	T	4	5	0.555556	3	5	0.625	Potri.001G153000	exonic
Chr01:12616064	T	C	26	12	0.315789	9	9	0.5	Potri.001G153000	exonic
Chr01:1262080	T	C	11	3	0.214286	10	3	0.230769	Potri.001G017500	exonic
Chr01:1262236	G	A	11	4	0.266667	11	7	0.388889	Potri.001G017500	exonic
Chr01:1262242	G	C	11	4	0.266667	15	7	0.318182	Potri.001G017500	exonic
Chr01:1262319	C	T	14	15	0.517241	13	23	0.638889	Potri.001G017500	exonic
Chr01:1262424	G	C	12	10	0.454545	16	14	0.466667	Potri.001G017500	exonic
Chr01:1262662	C	T	20	10	0.333333	21	18	0.461538	Potri.001G017500	exonic
Chr01:1262761	A	C	18	4	0.181818	22	4	0.153846	Potri.001G017500	exonic
Chr01:1262896	T	G	12	13	0.52	28	17	0.377778	Potri.001G017500	exonic
Chr01:1263027	G	T	10	4	0.285714	7	3	0.3	Potri.001G017500	UTR3
Chr01:12630455	G	A	8	3	0.272727	3	3	0.5	Potri.001G153100	exonic
Chr01:12630458	C	G	8	3	0.272727	3	3	0.5	Potri.001G153100	exonic
Chr01:12630572	C	T	4	5	0.555556	3	2	0.4	Potri.001G153100	exonic
Chr01:12630855	A	G	18	10	0.357143	12	3	0.2	Potri.001G153100	exonic
Chr01:12630893	T	A	9	18	0.666667	3	10	0.769231	Potri.001G153100	exonic
Chr01:12631344	T	C	21	22	0.511628	4	11	0.733333	Potri.001G153100	exonic
Chr01:12631375	T	C	14	14	0.5	3	4	0.571429	Potri.001G153100	exonic
Chr01:12631381	A	T	13	11	0.458333	2	3	0.6	Potri.001G153100	exonic
Chr01:12656688	C	A	25	36	0.590164	11	12	0.521739	Potri.001G153300	exonic
Chr01:12659651	A	G	11	10	0.47619	3	7	0.7	Potri.001G153300	exonic
Chr01:12665152	T	A	13	5	0.277778	7	3	0.3	Potri.001G153400	exonic
Chr01:12665629	T	C	24	24	0.5	11	16	0.592593	Potri.001G153400	exonic
Chr01:12665683	T	C	17	25	0.595238	12	10	0.454545	Potri.001G153400	exonic
Chr01:12665760	G	A	59	41	0.41	27	12	0.307692	Potri.001G153400	exonic
Chr01:12665780	C	T	41	50	0.549451	15	21	0.583333	Potri.001G153400	exonic
Chr01:12665803	A	G	43	35	0.448718	13	9	0.409091	Potri.001G153400	exonic
Chr01:12665839	C	T	17	23	0.575	6	5	0.454545	Potri.001G153400	exonic
Chr01:12665967	T	C	6	11	0.647059	2	6	0.75	Potri.001G153400	exonic
Chr01:12666197	C	T	11	7	0.388889	5	7	0.583333	Potri.001G153400	exonic
Chr01:12666227	G	A	7	11	0.611111	6	4	0.4	Potri.001G153400	exonic
Chr01:12666254	T	A	9	5	0.357143	1	5	0.833333	Potri.001G153400	exonic
Chr01:12667589	A	G	21	5	0.192308	2	1	0.333333	Potri.001G153400	exonic
Chr01:1267465	T	A	3	1	0.25	2	3	0.6	Potri.001G017600	exonic
Chr01:12722532	T	C	39	8	0.170213	17	6	0.26087	Potri.001G154200	exonic
Chr01:12722578	G	T	99	21	0.175	52	11	0.174603	Potri.001G154200	exonic
Chr01:12722687	A	C	55	21	0.276316	21	15	0.416667	Potri.001G154200	exonic
Chr01:12722846	A	G	171	77	0.310484	64	31	0.326316	Potri.001G154200	exonic
Chr01:12722861	T	C	93	192	0.673684	37	70	0.654206	Potri.001G154200	exonic
Chr01:12722969	A	G	124	200	0.617284	69	69	0.5	Potri.001G154200 \Potri.001G154200	exonic\x3bsplicing
Chr01:12723083	G	C	123	199	0.618012	48	84	0.636364	Potri.001G154200	exonic
Chr01:12723110	A	G	140	215	0.605634	49	97	0.664384	Potri.001G154200	exonic
Chr01:12723162	A	C	232	117	0.335244	99	46	0.317241	Potri.001G154200	exonic
Chr01:12723205	T	C	151	41	0.213542	54	23	0.298701	Potri.001G154200	exonic
Chr01:12723209	A	C	40	151	0.790576	21	54	0.72	Potri.001G154200	exonic
Chr01:12746918	T	C	90	28	0.237288	45	9	0.166667	Potri.001G154300	UTR5
Chr01:12746960	T	C	90	69	0.433962	43	26	0.376812	Potri.001G154300	UTR5
Chr01:12747110	T	C	127	143	0.52963	53	50	0.485437	Potri.001G154300	exonic
Chr01:12747916	A	G	100	93	0.481865	42	32	0.432432	Potri.001G154300	exonic
Chr01:12748542	A	G	85	88	0.508671	50	29	0.367089	Potri.001G154300	exonic
Chr01:12748904	A	C	11	6	0.352941	1	2	0.666667	Potri.001G154300	intronic
Chr01:12749012	C	T	5	5	0.5	1	6	0.857143	Potri.001G154300	intronic
Chr01:12749776	A	C	31	48	0.607595	14	18	0.5625	Potri.001G154300	exonic
Chr01:12749813	G	T	48	31	0.392405	18	13	0.419355	Potri.001G154300	exonic
Chr01:12755207	T	C	8	7	0.466667	7	3	0.3	Potri.001G154400	intronic
Chr01:12755661	G	A	31	24	0.436364	14	17	0.548387	Potri.001G154400	exonic
Chr01:12762396	C	T	31	15	0.326087	9	5	0.357143	Potri.001G154500	exonic
Chr01:12762646	A	G	13	39	0.75	6	14	0.7	Potri.001G154500	exonic
Chr01:12763610	A	G	12	31	0.72093	7	6	0.461538	Potri.001G154500	UTR3
Chr01:12776824	A	G	1	2	0.666667	2	2	0.5	Potri.001G154600	intronic
Chr01:12777081	T	C	16	17	0.515152	7	14	0.666667	Potri.001G154600	exonic
Chr01:12777124	C	A	15	16	0.516129	7	13	0.65	Potri.001G154600	exonic
Chr01:12777693	A	G	24	41	0.630769	19	35	0.648148	Potri.001G154600	exonic
Chr01:12777786	A	G	29	76	0.72381	30	54	0.642857	Potri.001G154600	exonic
Chr01:12777844	T	C	77	10	0.114943	46	7	0.132075	Potri.001G154600	exonic
Chr01:12777965	G	T	28	8	0.222222	20	5	0.2	Potri.001G154600	exonic
Chr01:12779068	A	G	23	6	0.206897	12	2	0.142857	Potri.001G154700	exonic
Chr01:12779173	T	C	7	25	0.78125	3	14	0.823529	Potri.001G154700	exonic
Chr01:12779260	A	G	37	18	0.327273	12	6	0.333333	Potri.001G154700	exonic
Chr01:12779421	G	C	18	3	0.142857	7	4	0.363636	Potri.001G154700	exonic
Chr01:12781817	A	G	9	9	0.5	4	5	0.555556	Potri.001G154700	exonic
Chr01:12788733	C	T	6	6	0.5	1	5	0.833333	Potri.001G154900	exonic
Chr01:12789184	T	G	13	4	0.235294	3	2	0.4	Potri.001G154900	exonic
Chr01:12789717	C	A	6	4	0.4	2	8	0.8	Potri.001G154900	exonic
Chr01:12789777	A	G	9	4	0.307692	1	7	0.875	Potri.001G154900	exonic
Chr01:12789864	A	G	12	9	0.428571	3	5	0.625	Potri.001G154900	exonic
Chr01:12789936	A	T	7	5	0.416667	2	2	0.5	Potri.001G154900	exonic
Chr01:12796268	G	A	2	5	0.714286	3	2	0.4	Potri.001G155000	exonic
Chr01:12806115	C	T	8	8	0.5	5	6	0.545455	Potri.001G155100	exonic
Chr01:12806725	C	T	11	17	0.607143	9	8	0.470588	Potri.001G155100	exonic
Chr01:12806731	A	G	19	13	0.40625	10	9	0.473684	Potri.001G155100	exonic
Chr01:12830977	C	T	18	14	0.4375	10	3	0.230769	Potri.001G155200	exonic
Chr01:12831585	A	G	12	9	0.428571	5	4	0.444444	Potri.001G155200	exonic
Chr01:12831790	C	A	6	5	0.454545	3	5	0.625	Potri.001G155200	exonic
Chr01:12831828	G	A	15	11	0.423077	9	5	0.357143	Potri.001G155200	exonic
Chr01:12831922	T	C	9	3	0.25	6	5	0.454545	Potri.001G155200	exonic
Chr01:12832638	A	G	11	8	0.421053	15	4	0.210526	Potri.001G155200	exonic
Chr01:12833829	T	C	9	6	0.4	5	7	0.583333	Potri.001G155200	exonic
Chr01:12834016	A	T	9	12	0.571429	10	3	0.230769	Potri.001G155200	exonic
Chr01:128360	G	A	22	13	0.371429	7	12	0.631579	Potri.001G002000	UTR3
Chr01:12836068	A	C	2	5	0.714286	3	5	0.625	Potri.001G155200	exonic
Chr01:12836111	G	A	12	2	0.142857	7	3	0.3	Potri.001G155200	exonic
Chr01:12836213	G	A	11	5	0.3125	6	3	0.333333	Potri.001G155200	exonic
Chr01:12836313	T	A	19	5	0.208333	3	4	0.571429	Potri.001G155200	exonic
Chr01:12836377	A	G	9	9	0.5	5	4	0.444444	Potri.001G155200	exonic
Chr01:12836472	G	T	14	5	0.263158	1	2	0.666667	Potri.001G155200	exonic
Chr01:12836700	T	C	1	2	0.666667	2	3	0.6	Potri.001G155200	exonic
Chr01:12836815	C	G	17	15	0.46875	7	3	0.3	Potri.001G155200	exonic
Chr01:128437	G	T	103	18	0.14876	28	6	0.176471	Potri.001G002000	UTR3
Chr01:12845676	A	G	10	25	0.714286	13	14	0.518519	Potri.001G155300	UTR5
Chr01:12845733	A	T	15	31	0.673913	21	14	0.4	Potri.001G155300	exonic
Chr01:12845734	C	T	32	15	0.319149	16	21	0.567568	Potri.001G155300	exonic
Chr01:12847885	A	G	24	23	0.489362	4	16	0.8	Potri.001G155300	exonic
Chr01:12847927	A	T	16	29	0.644444	9	10	0.526316	Potri.001G155300	exonic
Chr01:12848203	T	C	12	9	0.428571	10	7	0.411765	Potri.001G155300	UTR3
Chr01:12848369	A	T	10	11	0.52381	12	12	0.5	Potri.001G155300	UTR3
Chr01:12867112	T	C	49	150	0.753769	22	40	0.645161	Potri.001G155500	exonic
Chr01:12867143	C	G	98	27	0.216	19	11	0.366667	Potri.001G155500	exonic
Chr01:12867453	T	C	21	4	0.16	4	3	0.428571	Potri.001G155500	exonic
Chr01:12867966	A	T	148	51	0.256281	46	11	0.192982	Potri.001G155500	exonic
Chr01:12867993	T	A	162	52	0.242991	54	13	0.19403	Potri.001G155500	exonic
Chr01:12869042	T	C	25	28	0.528302	8	7	0.466667	Potri.001G155500	exonic
Chr01:12869114	C	T	66	18	0.214286	12	2	0.142857	Potri.001G155500	exonic
Chr01:12870071	C	T	82	41	0.333333	24	7	0.225806	Potri.001G155500	exonic
Chr01:12870117	T	C	54	119	0.687861	12	22	0.647059	Potri.001G155500	exonic
Chr01:12870898	A	G	3	49	0.942308	2	9	0.818182	Potri.001G155500	exonic
Chr01:12870960	T	C	22	42	0.65625	4	9	0.692308	Potri.001G155500	exonic
Chr01:12873486	T	G	76	121	0.614213	23	19	0.452381	Potri.001G155500	exonic
Chr01:12873668	T	C	34	38	0.527778	8	6	0.428571	Potri.001G155500	exonic
Chr01:12890190	T	C	29	11	0.275	28	15	0.348837	Potri.001G155700	exonic
Chr01:12890286	T	C	28	19	0.404255	22	28	0.56	Potri.001G155700	exonic
Chr01:12890319	T	C	24	24	0.5	39	18	0.315789	Potri.001G155700	exonic
Chr01:12890353	C	A	19	22	0.536585	16	33	0.673469	Potri.001G155700	exonic
Chr01:12890355	A	G	23	17	0.425	33	15	0.3125	Potri.001G155700	exonic
Chr01:12890402	A	G	25	16	0.390244	31	23	0.425926	Potri.001G155700	exonic
Chr01:12890484	A	G	17	11	0.392857	25	10	0.285714	Potri.001G155700	exonic
Chr01:129009	A	G	95	122	0.562212	47	55	0.539216	Potri.001G002000	exonic
Chr01:12913689	T	C	7	2	0.222222	5	3	0.375	Potri.001G155800	exonic
Chr01:129148	G	A	14	17	0.548387	7	7	0.5	Potri.001G002000	exonic
Chr01:12924384	C	T	11	7	0.388889	3	3	0.5	Potri.001G155900	exonic
Chr01:12936776	T	C	6	4	0.4	4	7	0.636364	Potri.001G156000	UTR5
[truncated: 64,364 more rows]

## Sheet: Table S10
Table S10 Summary of P. tomentosa bisfulfite sequencing data.
[truncated: 7 more rows]

[truncated: 7 more sheets: Table S11, Table S12, Table S13, Table S14, Table S15, Table S16, Table S17]
